# Supplementary material for: Telescope: Characterization of the retrotranscriptome by accurate estimation of transposable element expression
Source: PubMed Central journal article supplement (PMC6786656; doi:10.1371/journal.pcbi.1006453), 2019-09-30

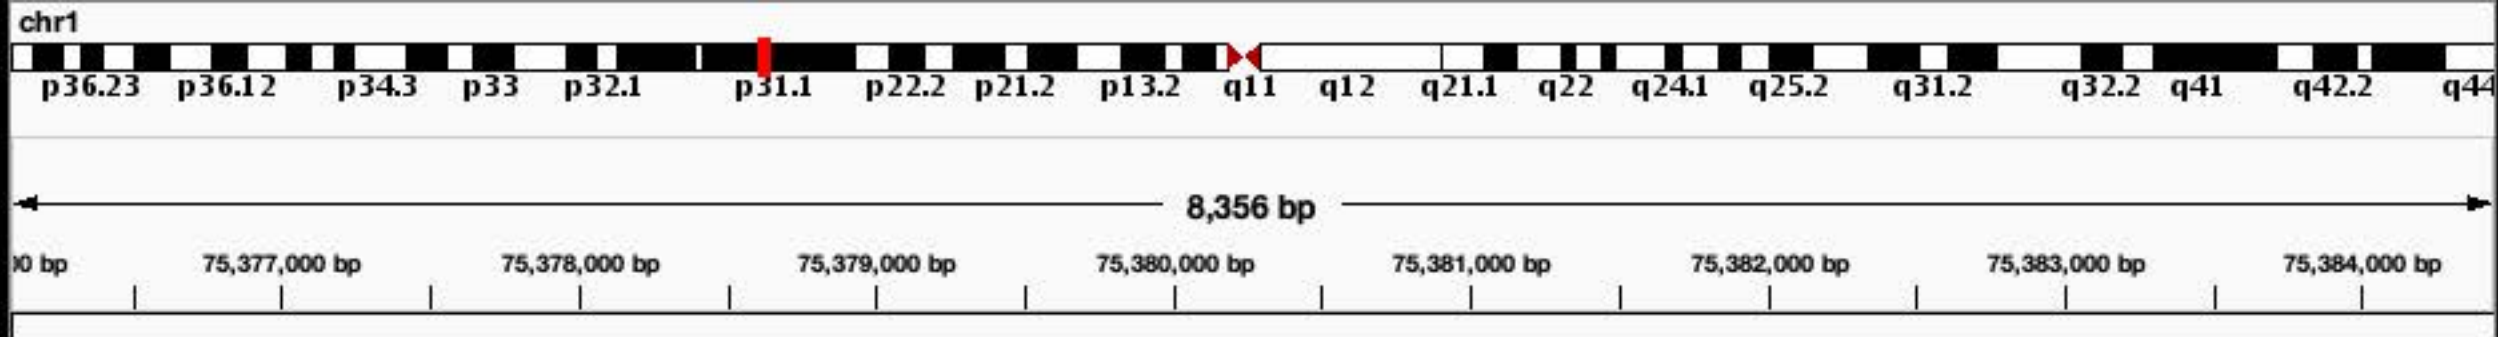

Gene

hg38.subramanianT1.gtf

hg38.subramanianT2.gtf

transcripts.gtf

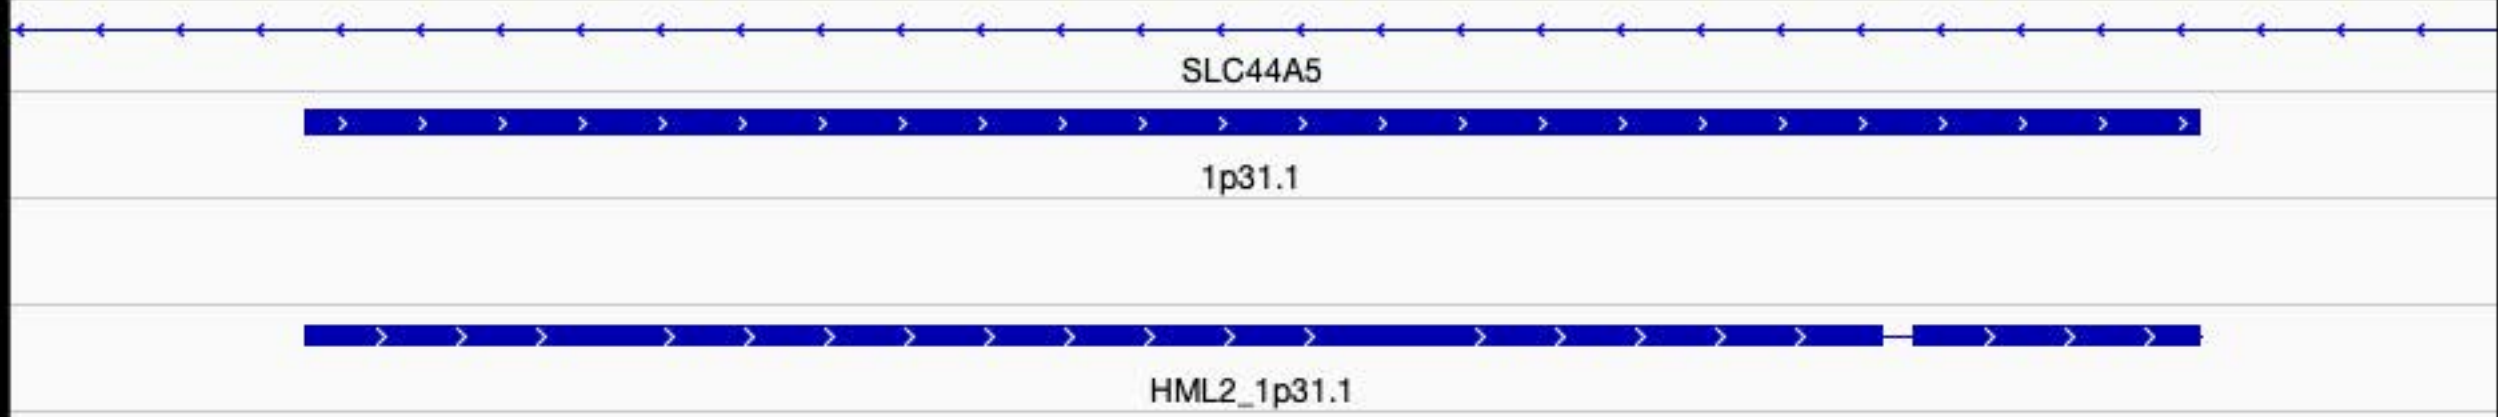

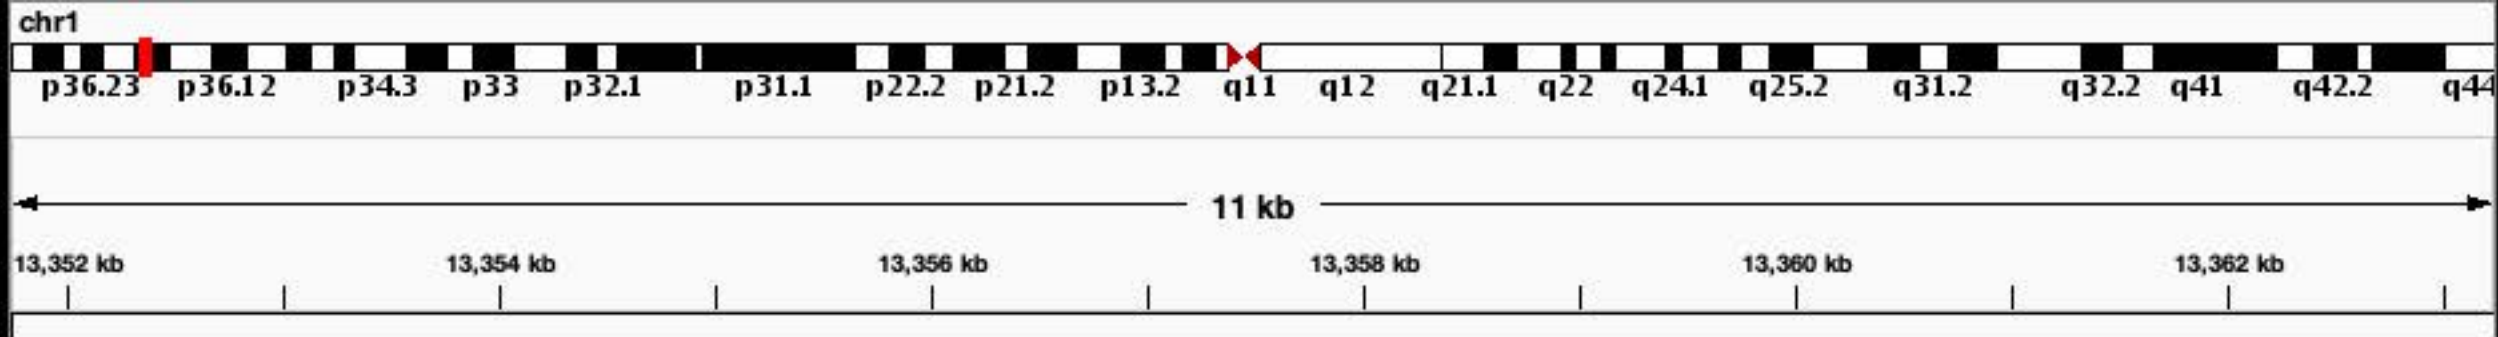

Gene

hg38.subramanianT1.gtf

hg38.subramanianT2.gtf

transcripts.gtf

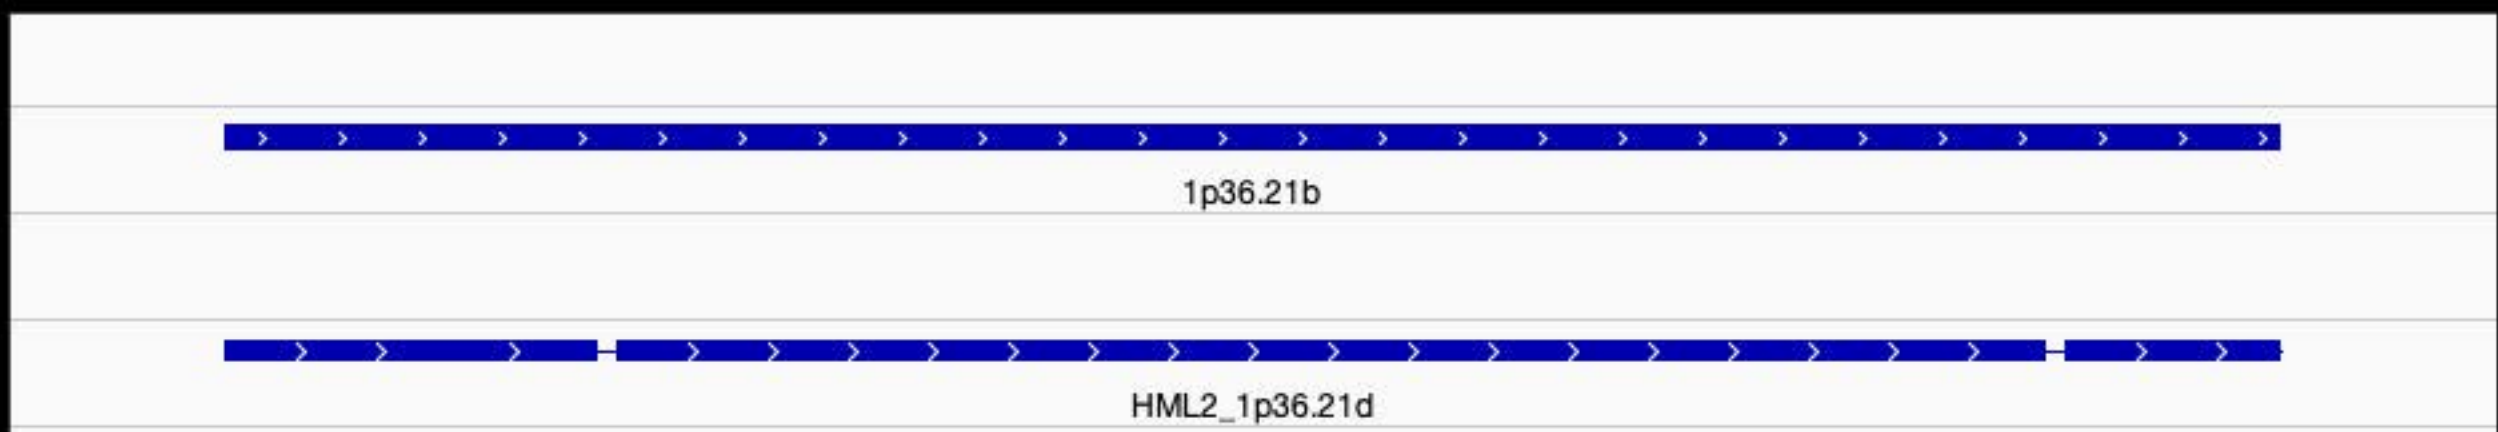

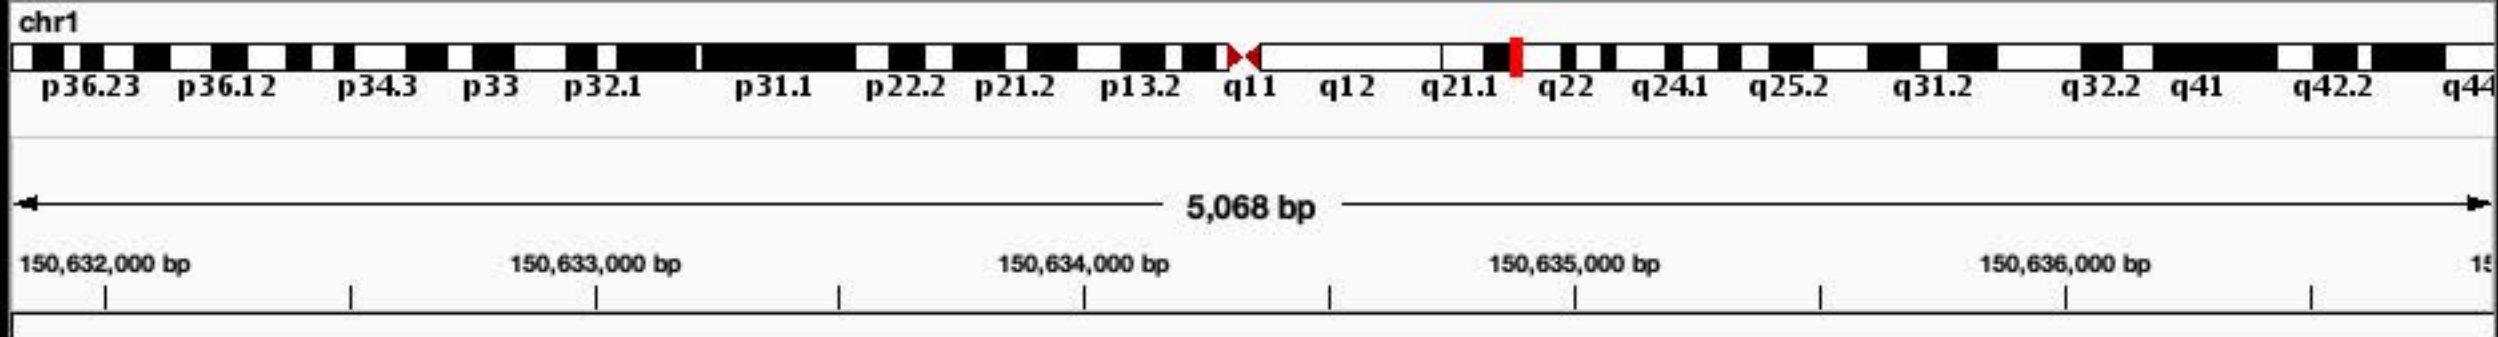

Gene

hg38.subramanianT1.gtf

hg38.subramanianT2.gtf

transcripts.gtf

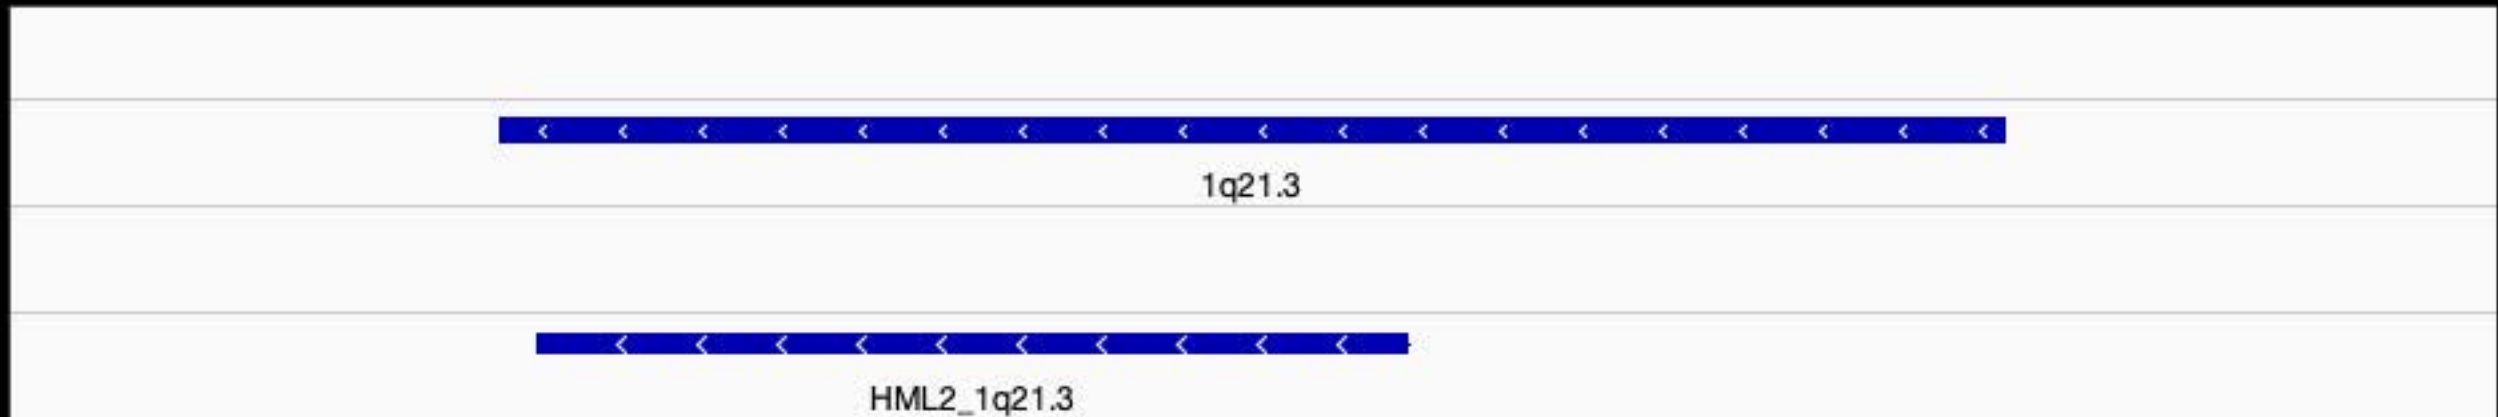

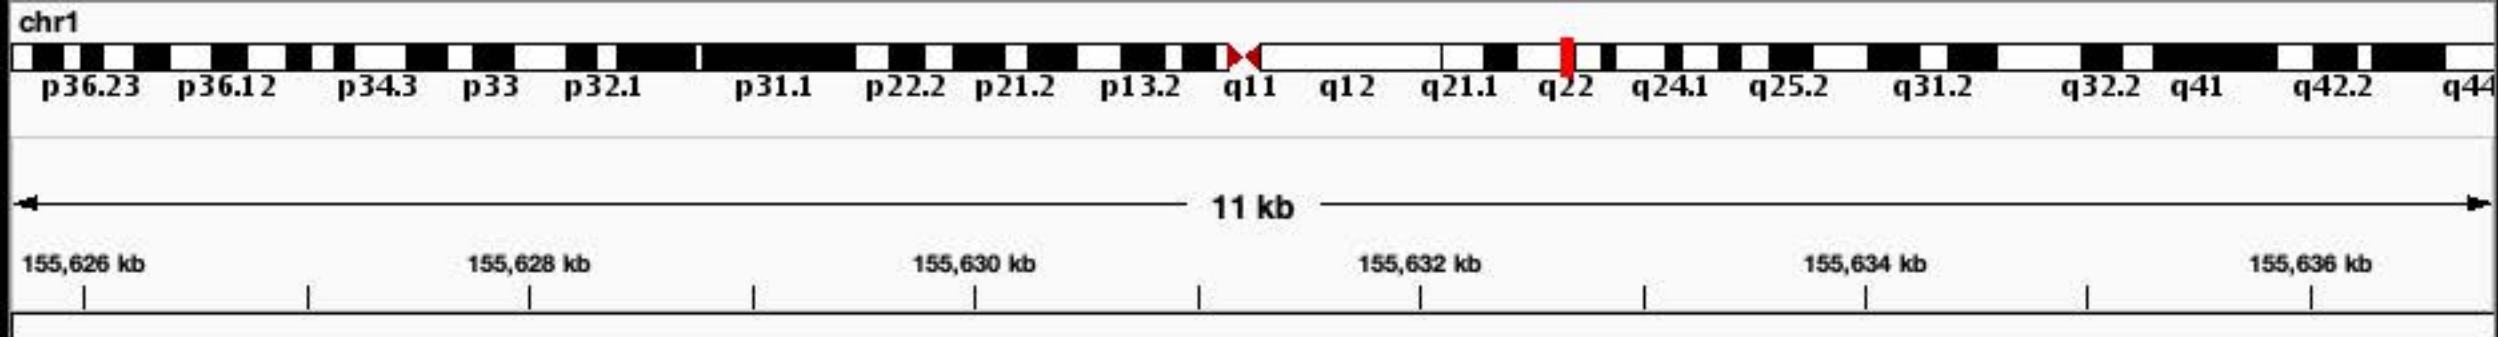

Gene

hg38.subramanianT1.gtf

hg38.subramanianT2.gtf

transcripts.gtf

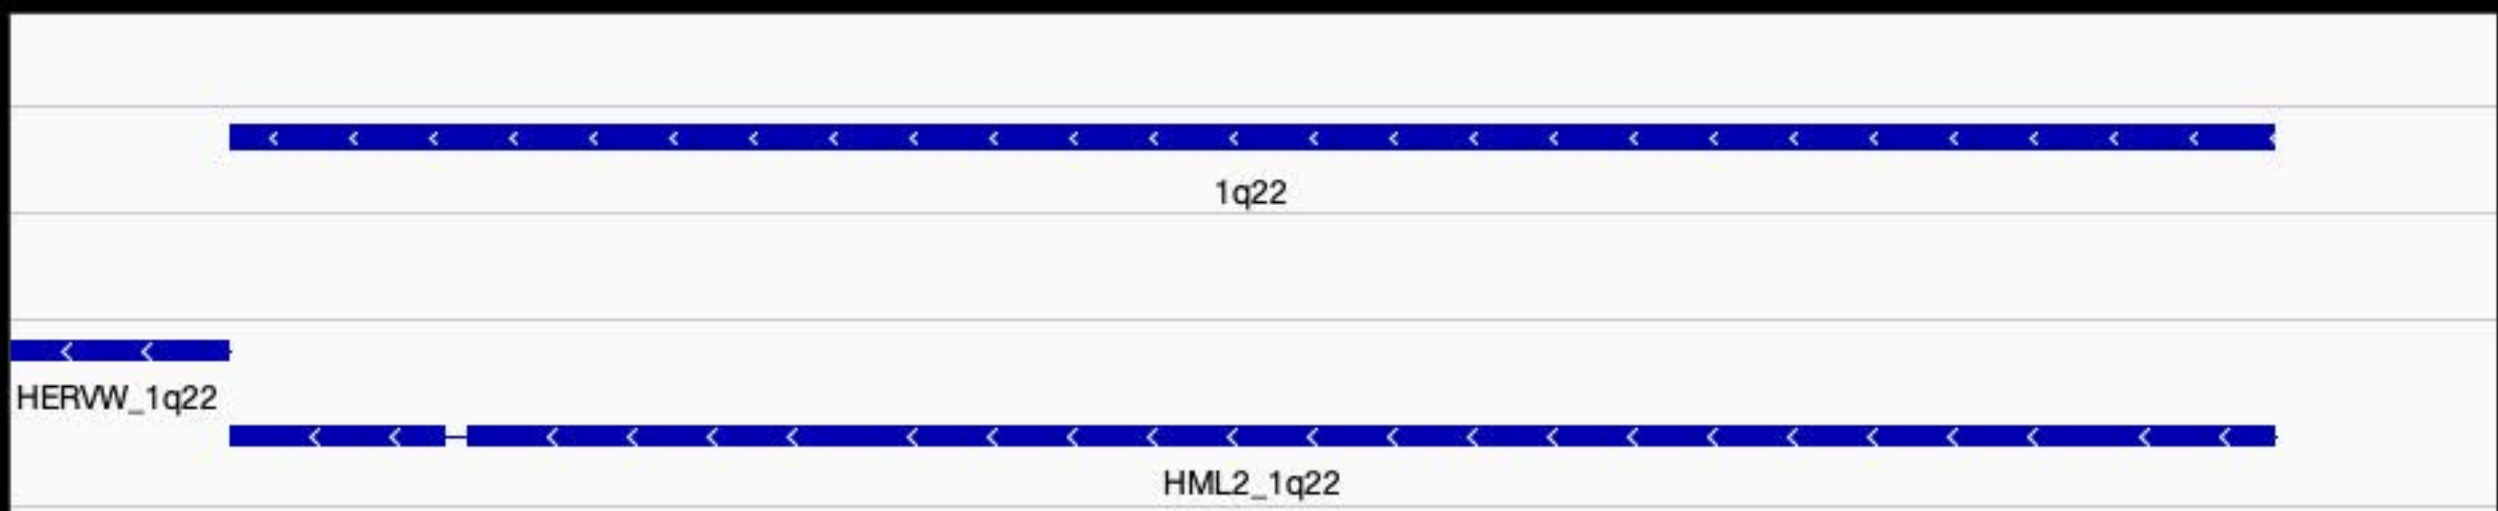

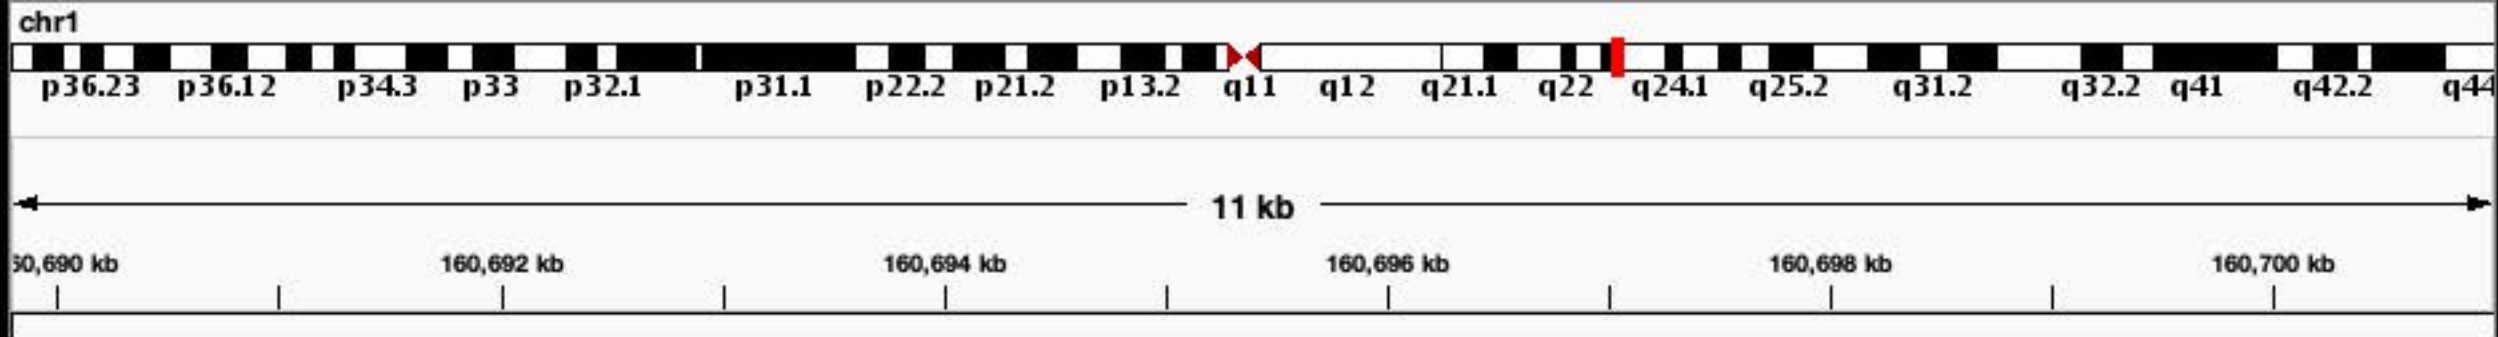

Gene

hg38.subramanianT1.gtf

hg38.subramanianT2.gtf

transcripts.gtf

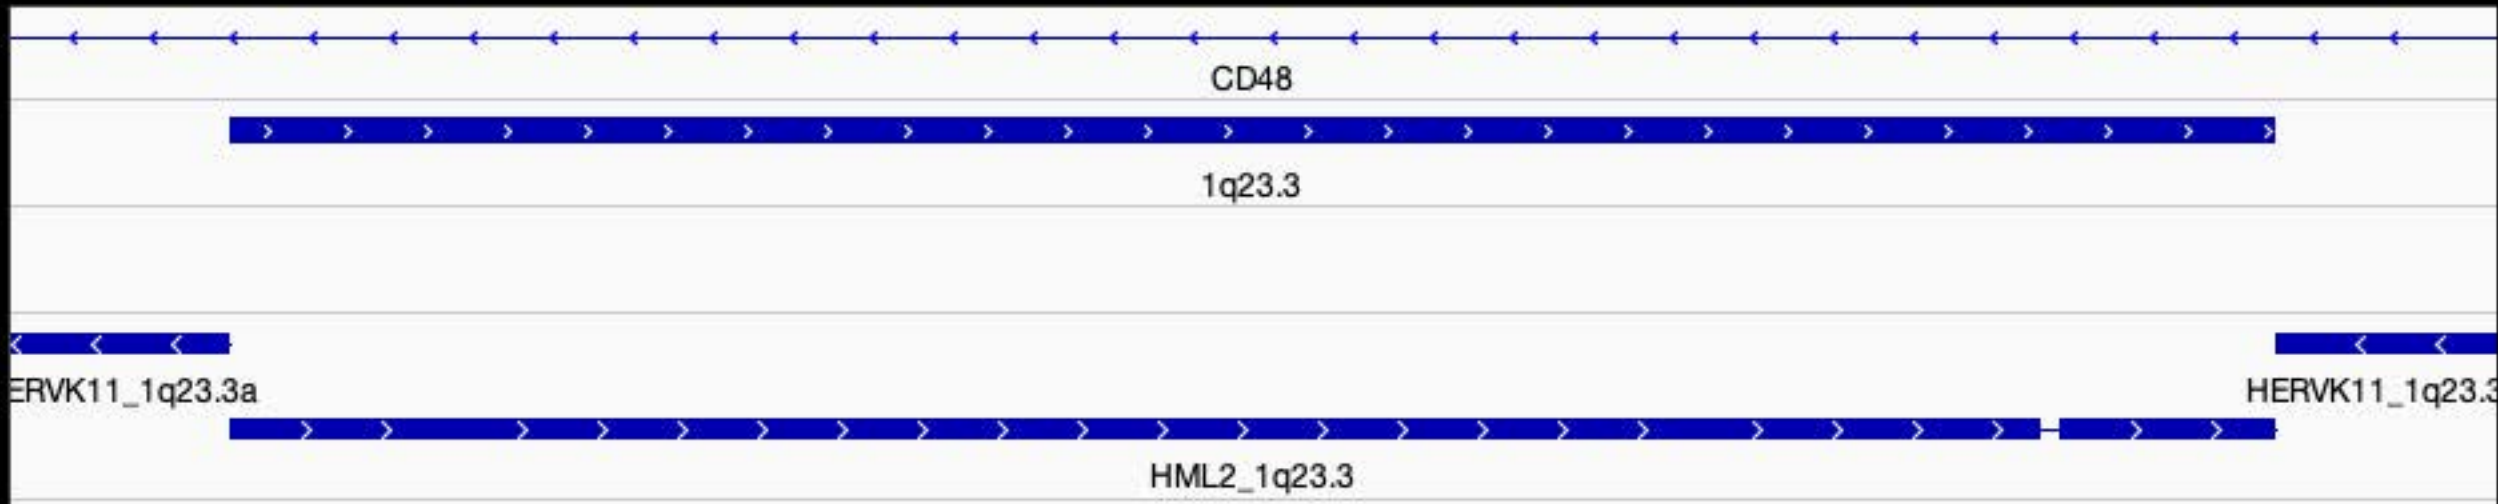

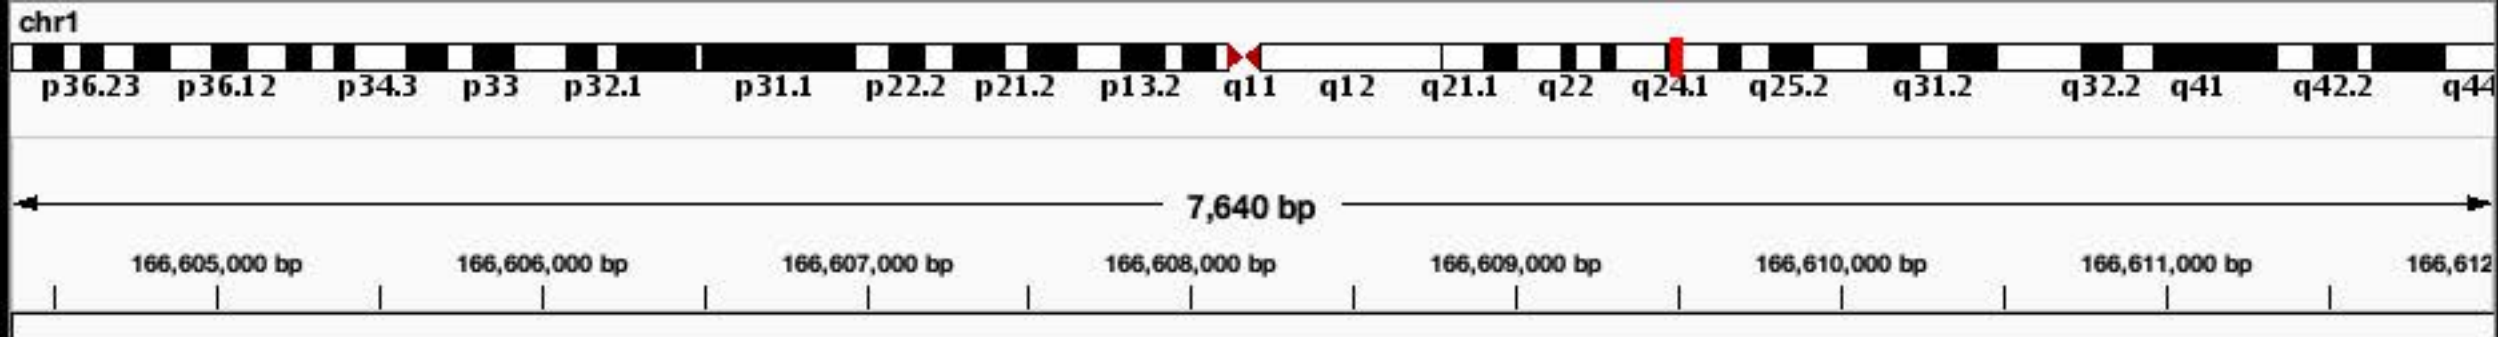

Gene

hg38.subramanianT1.gtf

hg38.subramanianT2.gtf

transcripts.gtf

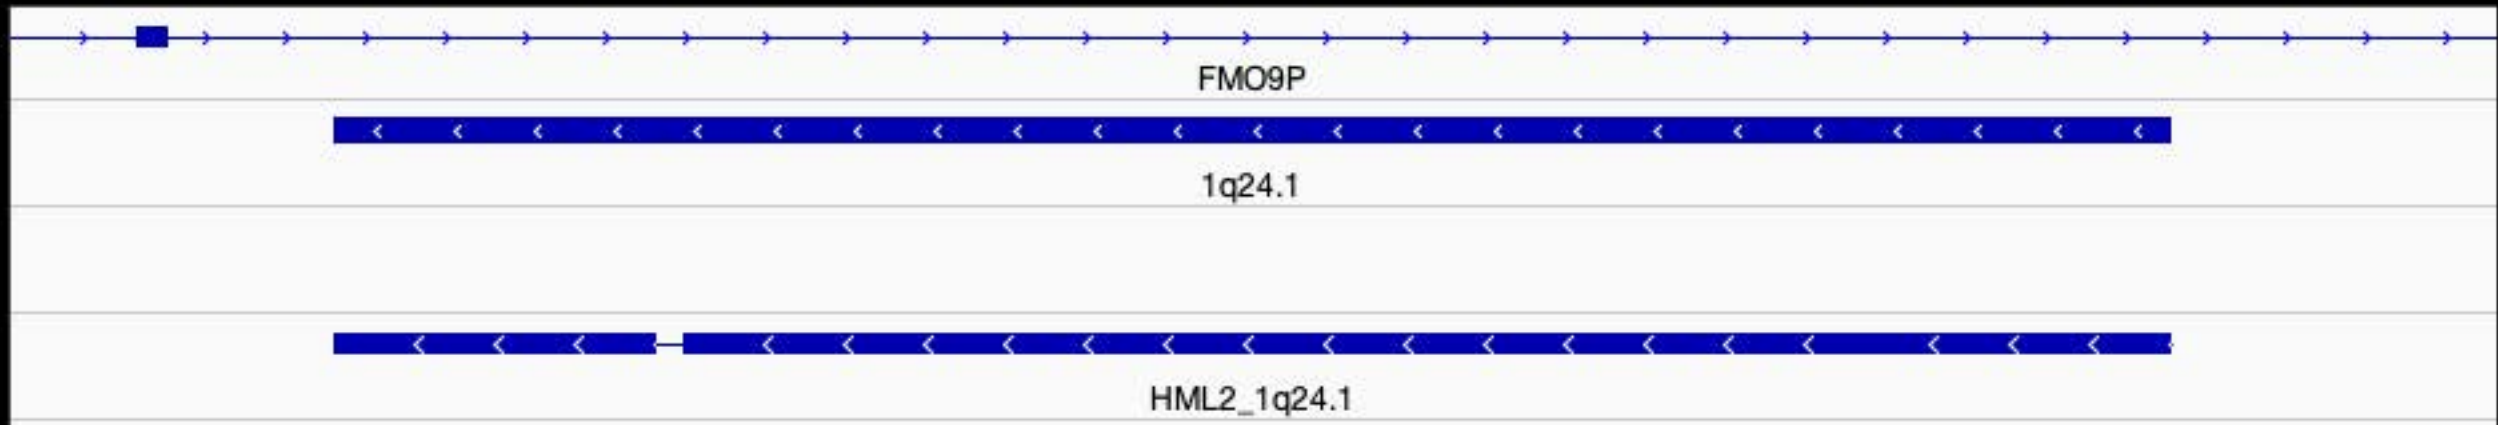

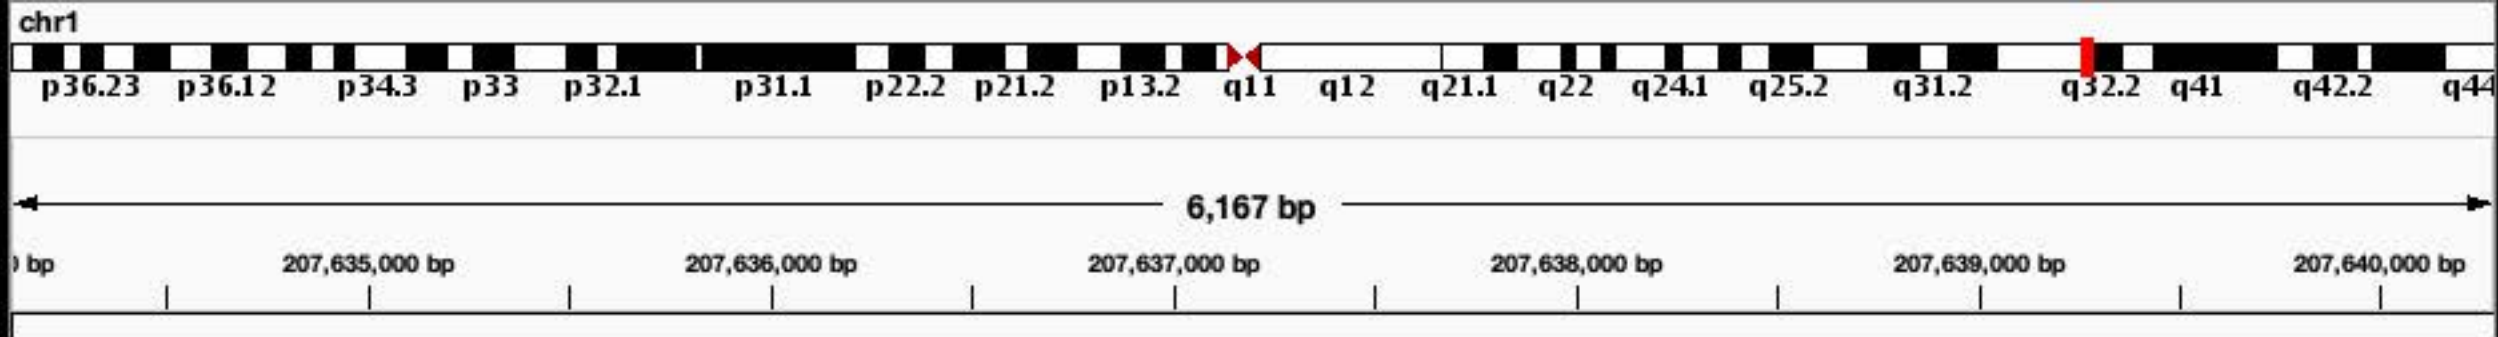

- Gene
- hg38.subramanianT1.gtf
- hg38.subramanianT2.gtf
- transcripts.gtf

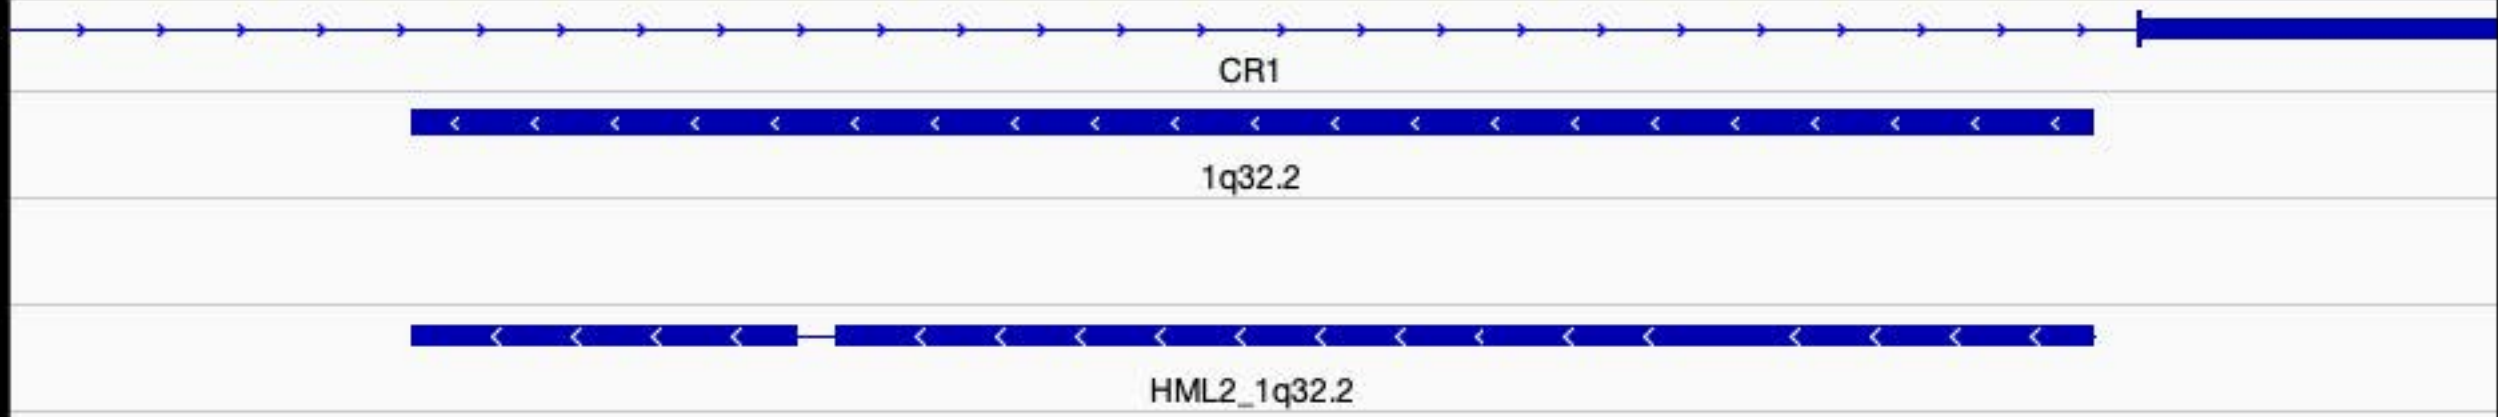

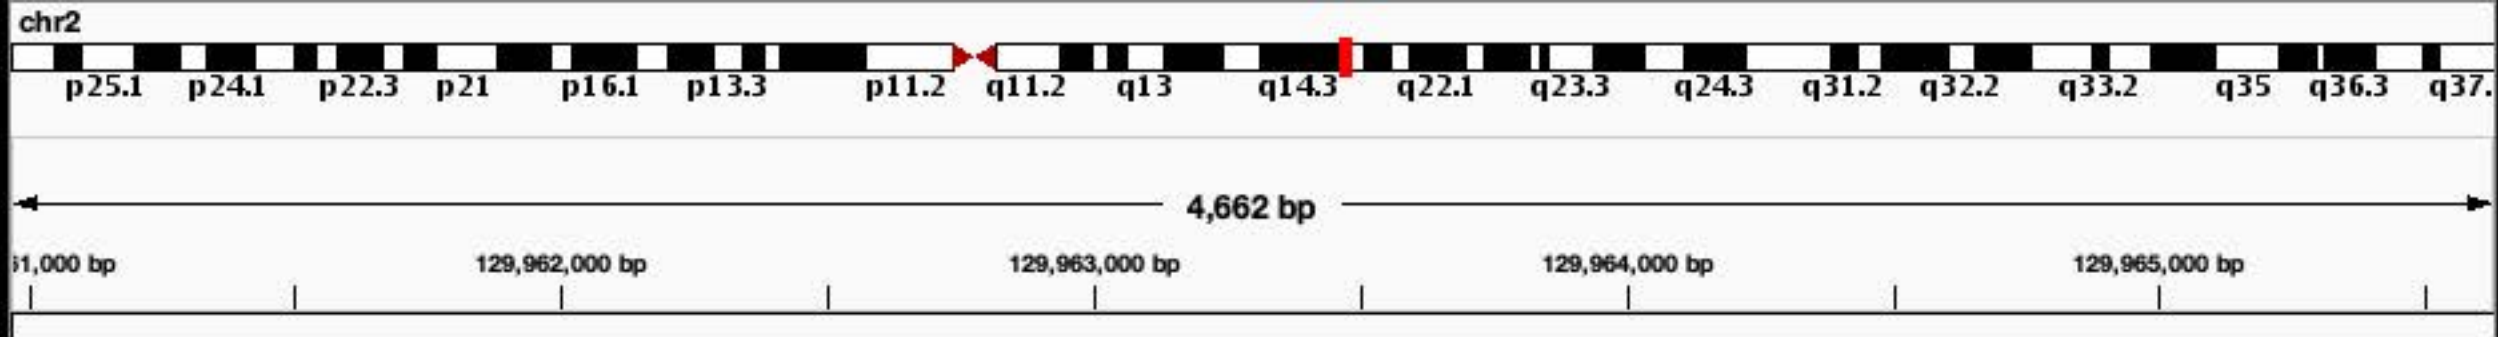

Gene

hg38.subramanianT1.gtf

hg38.subramanianT2.gtf

transcripts.gtf

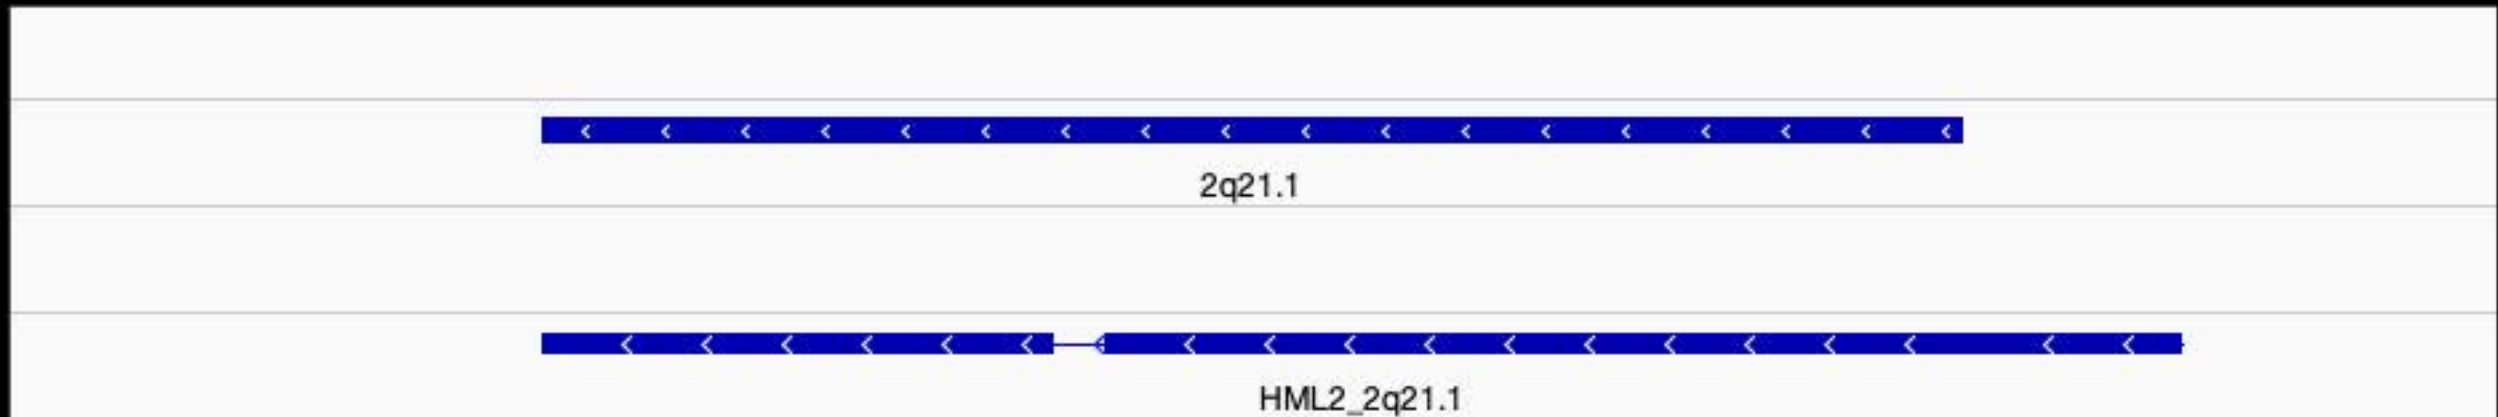



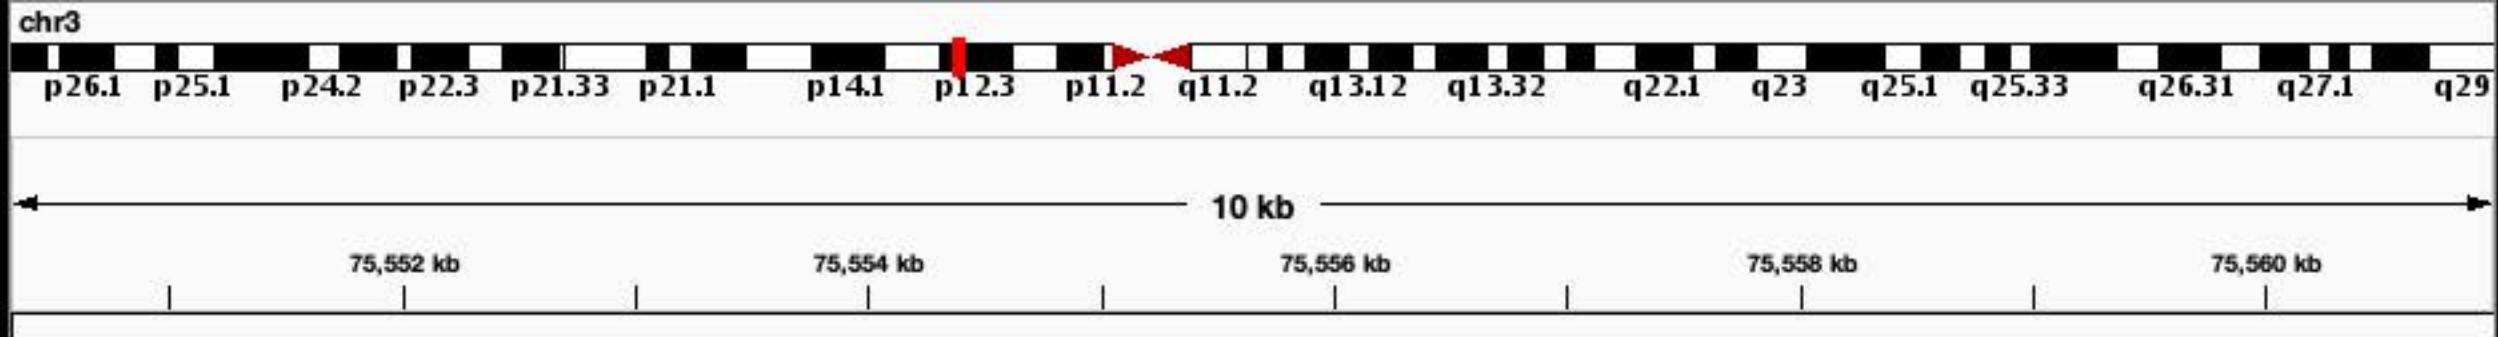

Gene

hg38.subramanianT1.gtf

hg38.subramanianT2.gtf

transcripts.gtf

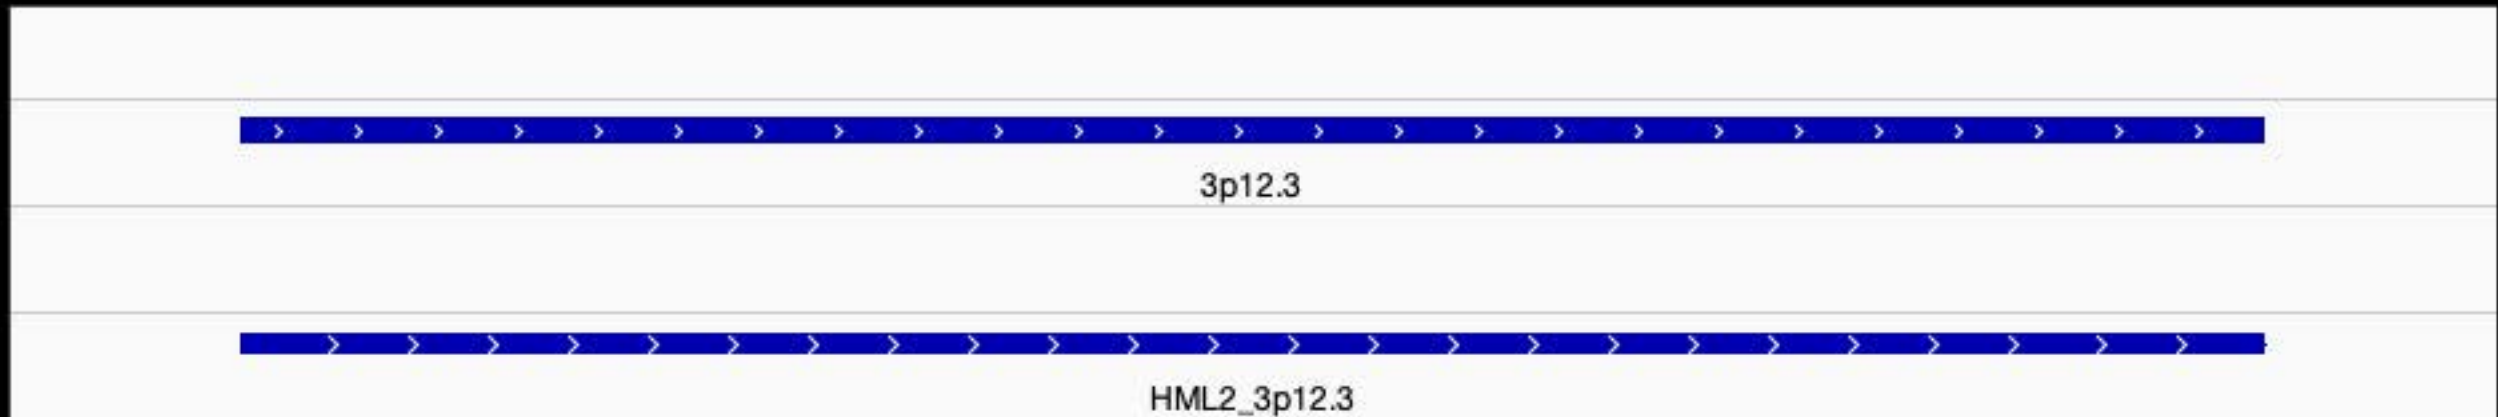

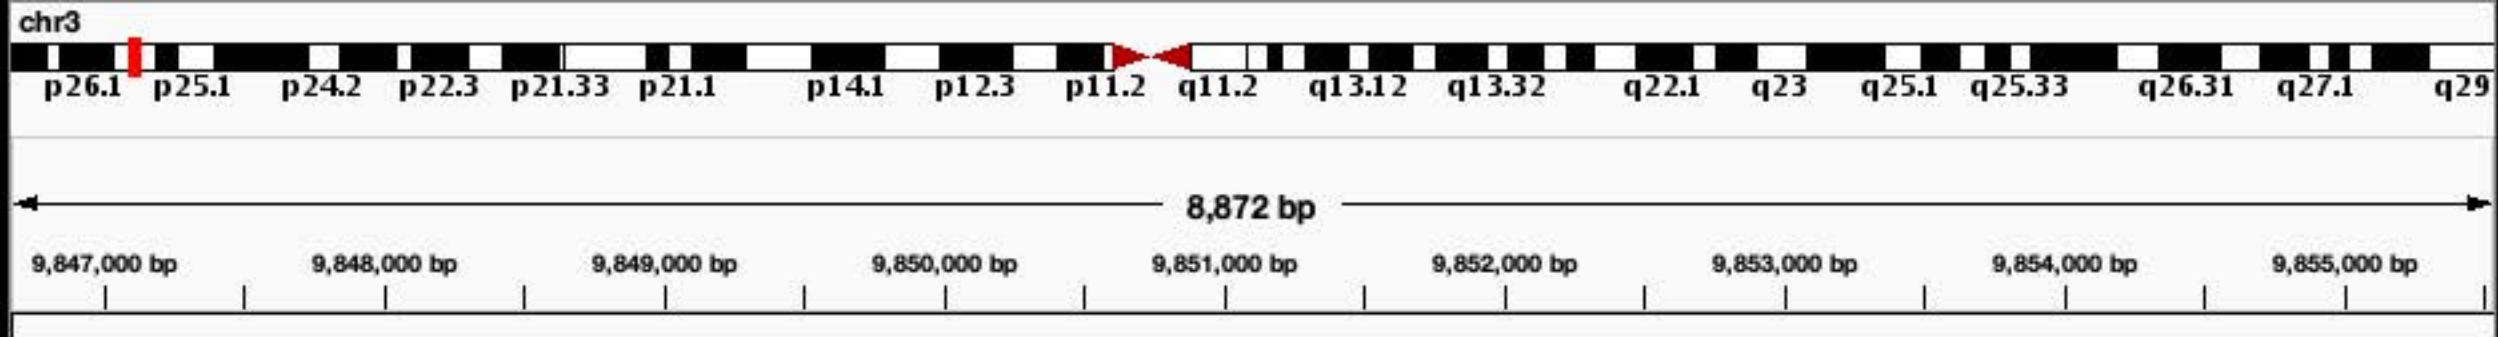

Gene

hg38.subramanianT1.gtf

hg38.subramanianT2.gtf

transcripts.gtf

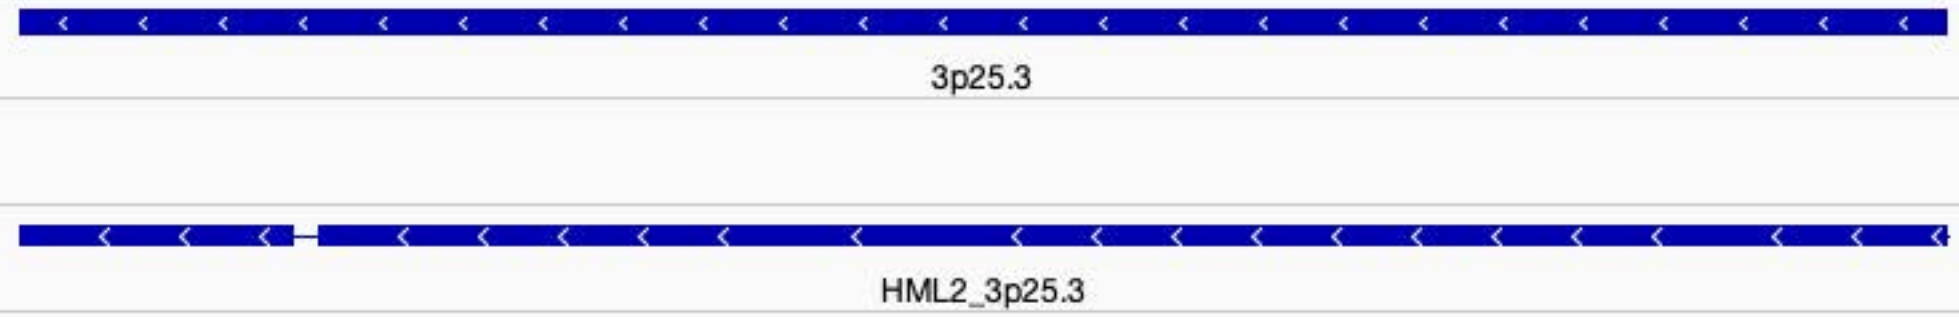

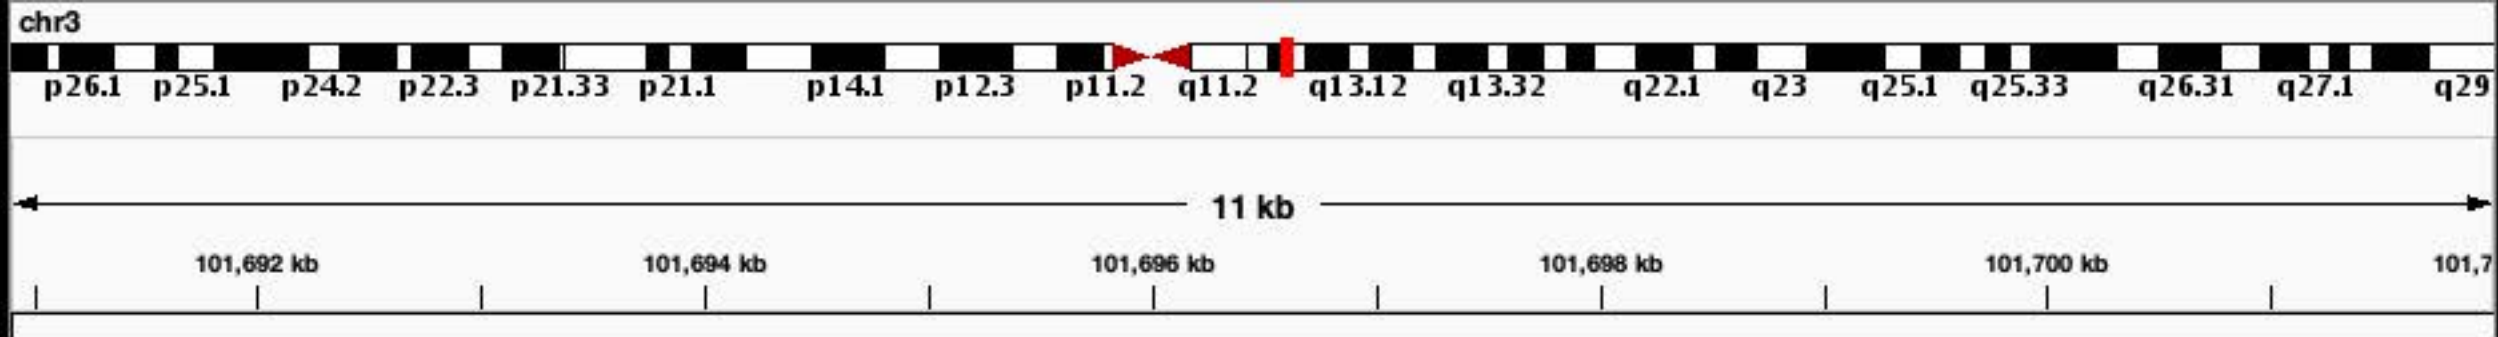

Gene

hg38.subramanianT1.gtf

hg38.subramanianT2.gtf

transcripts.gtf

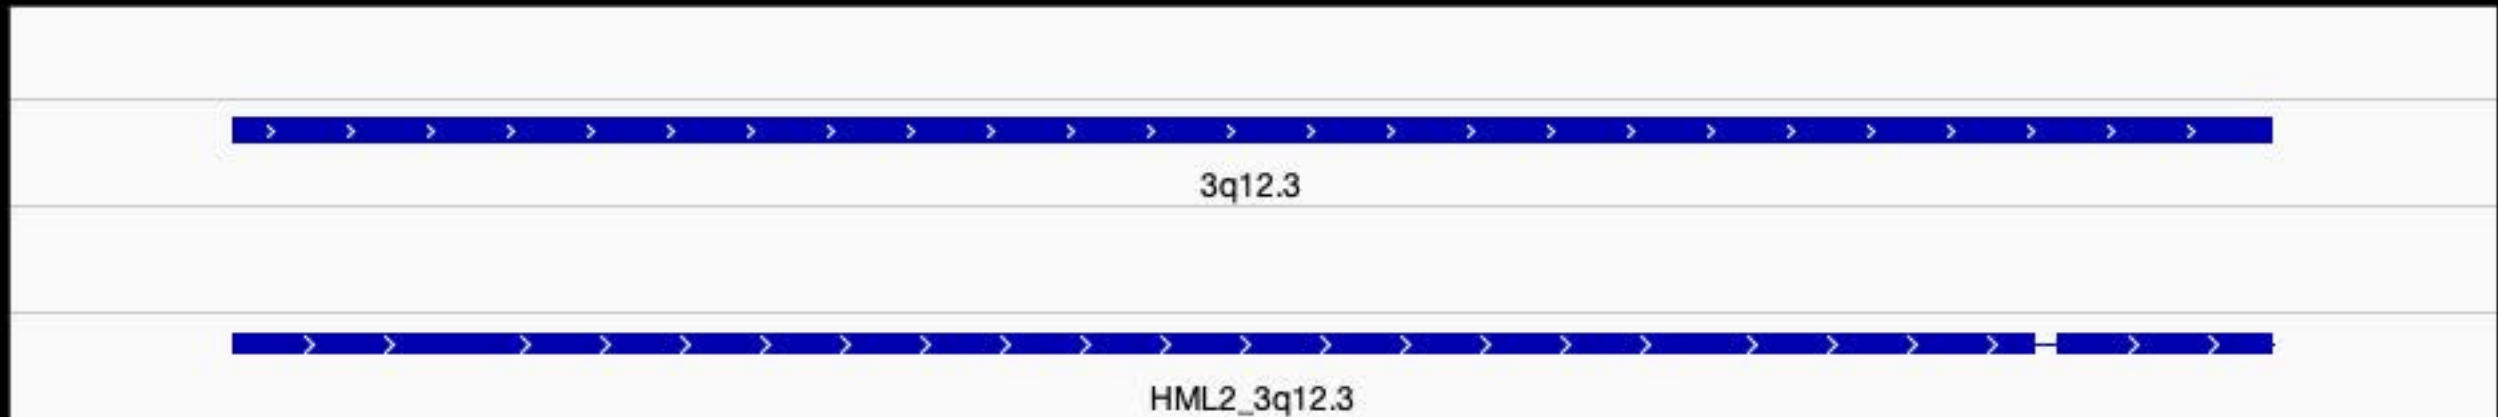

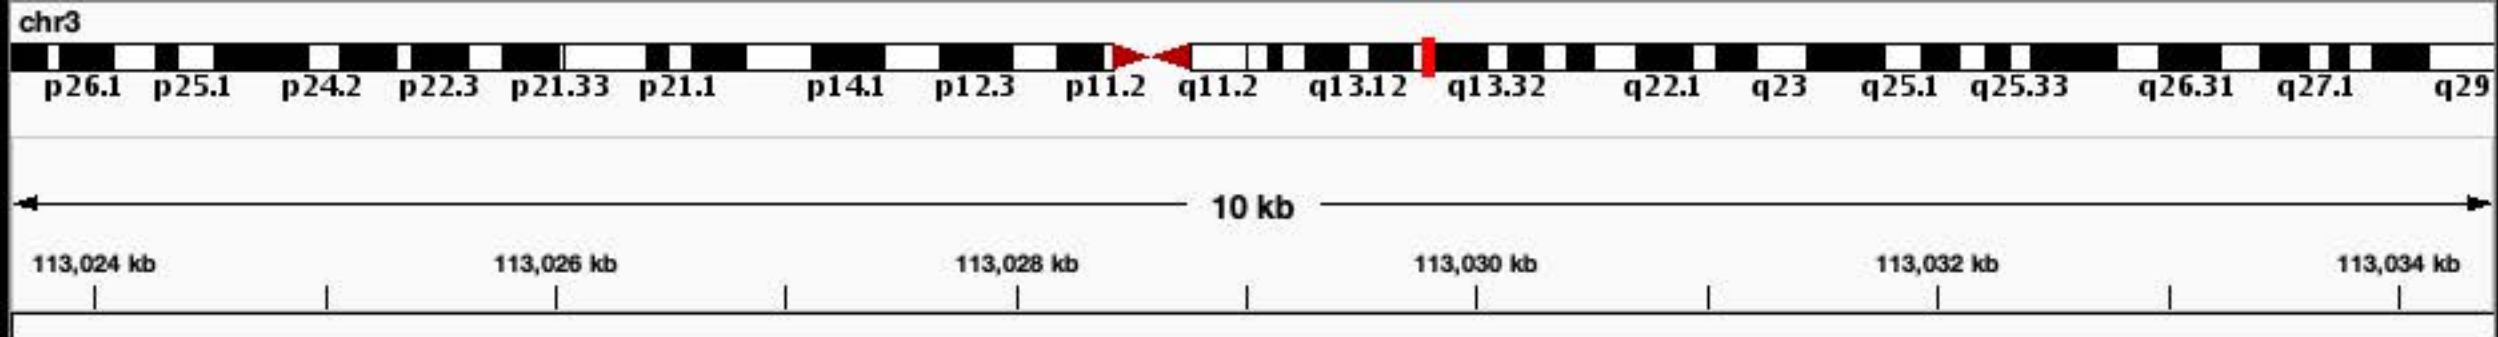

Gene

hg38.subramanianT1.gtf

hg38.subramanianT2.gtf

transcripts.gtf

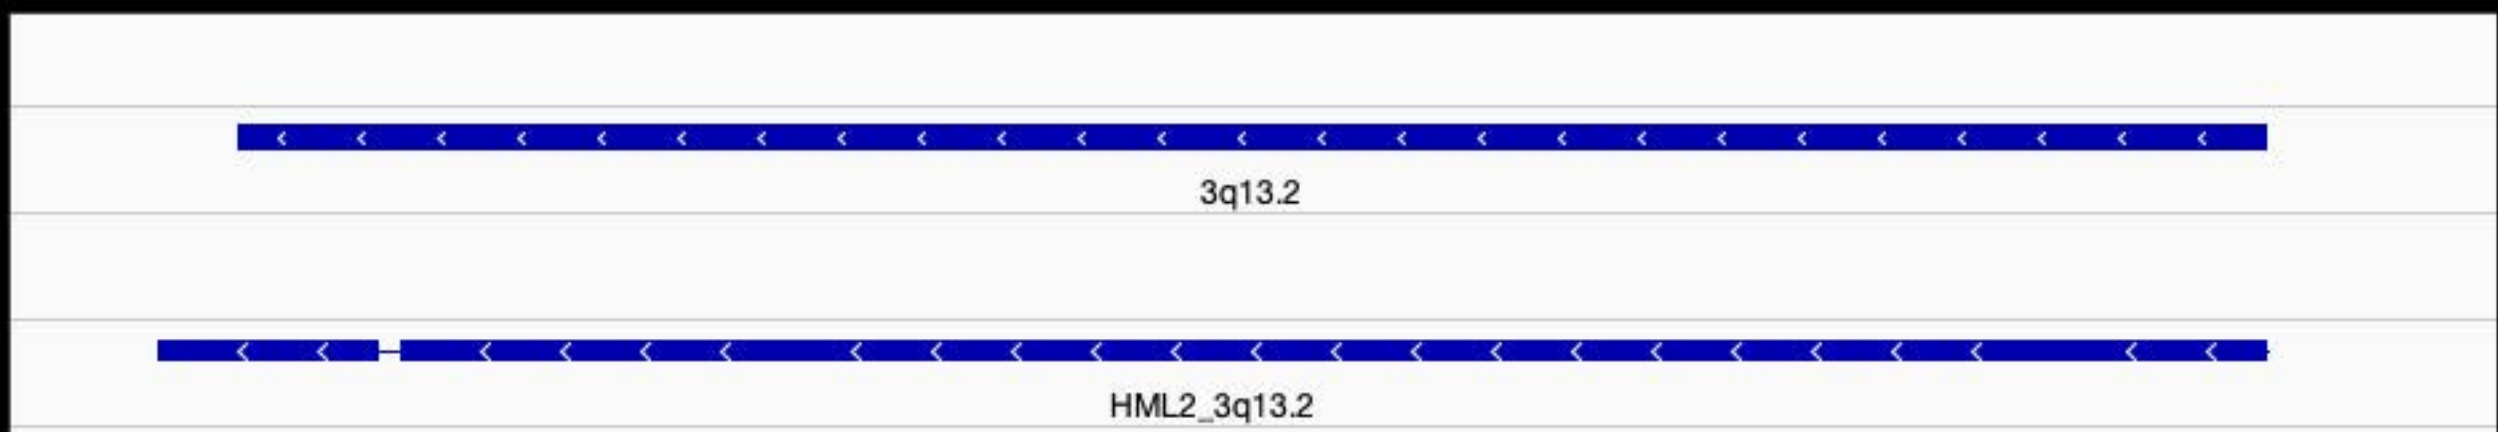

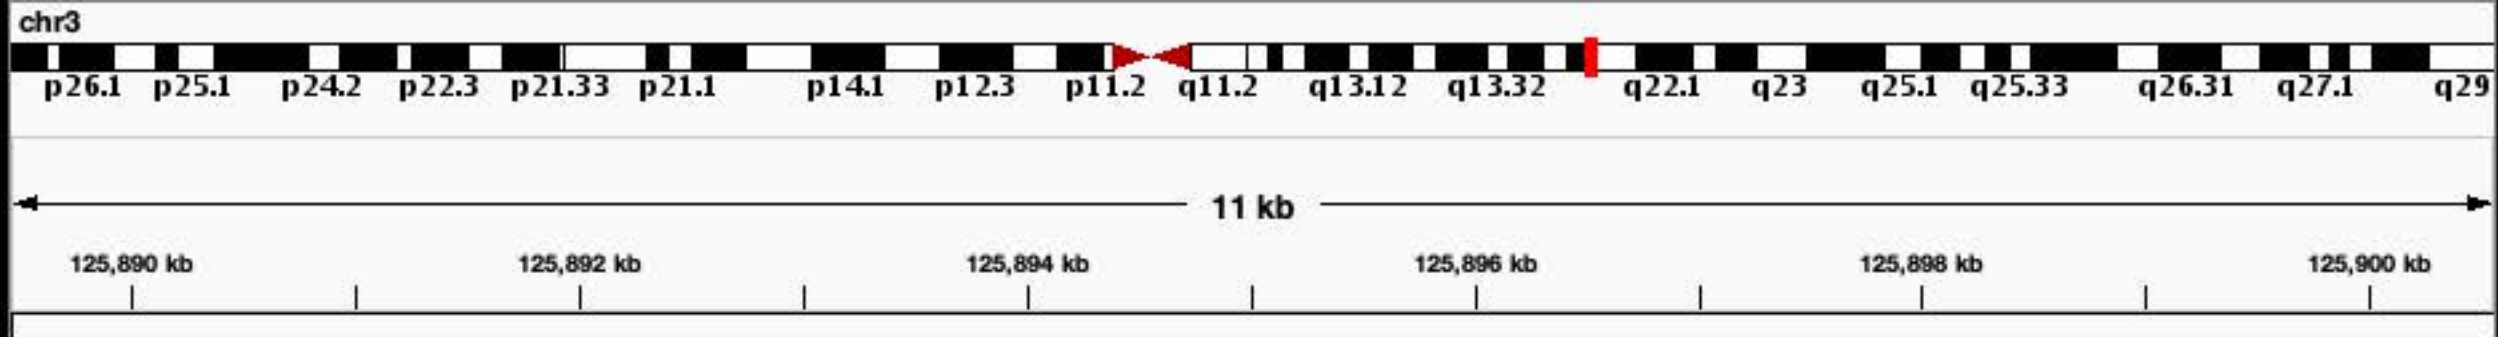

Gene

hg38.subramanianT1.gtf

hg38.subramanianT2.gtf

transcripts.gtf

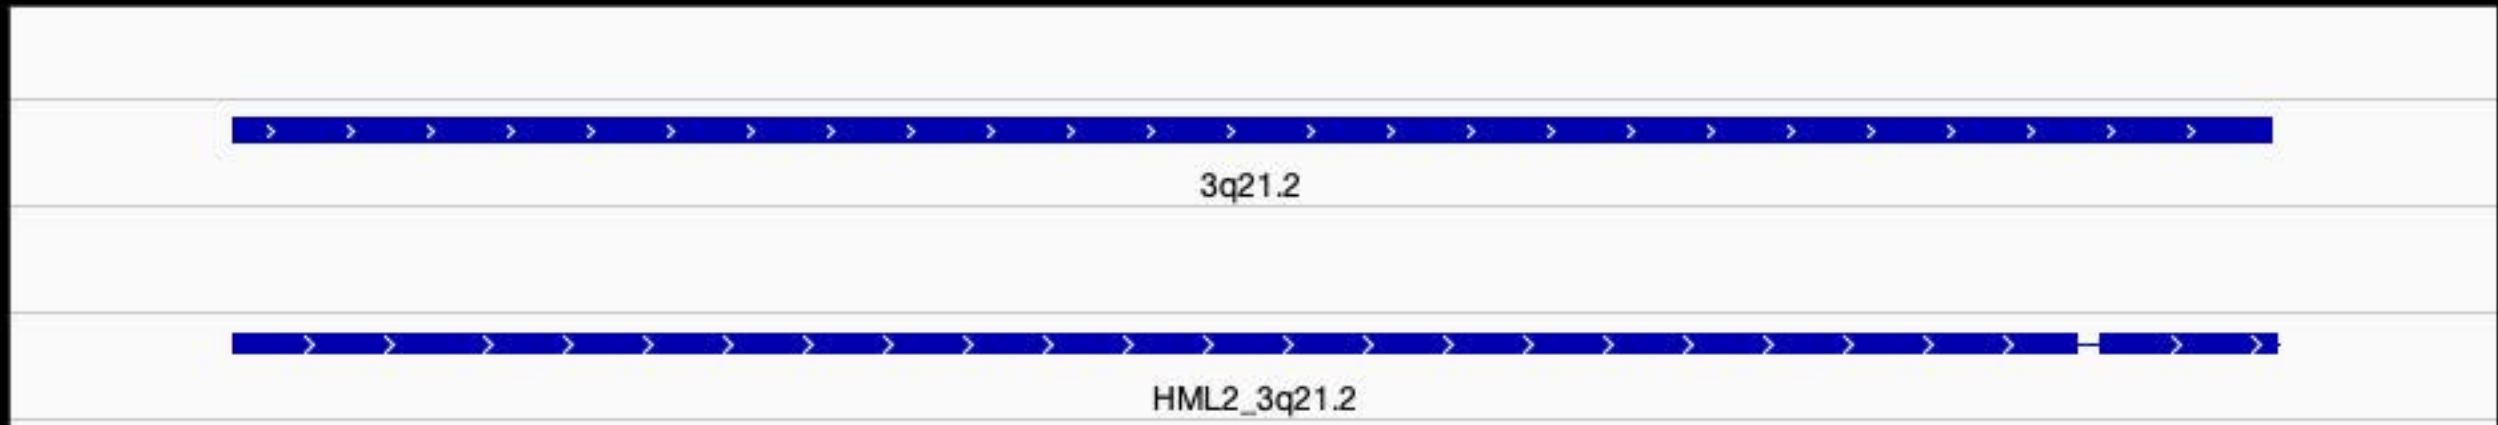

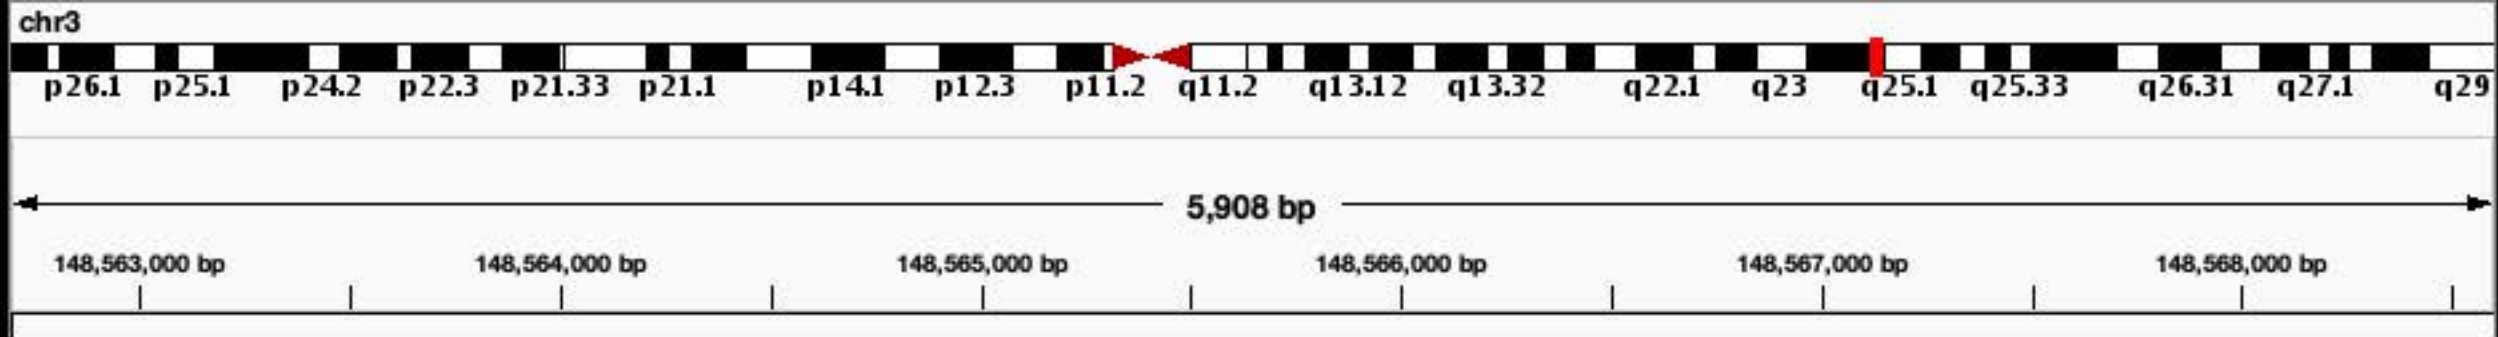

Gene

hg38.subramanianT1.gtf

hg38.subramanianT2.gtf

transcripts.gtf

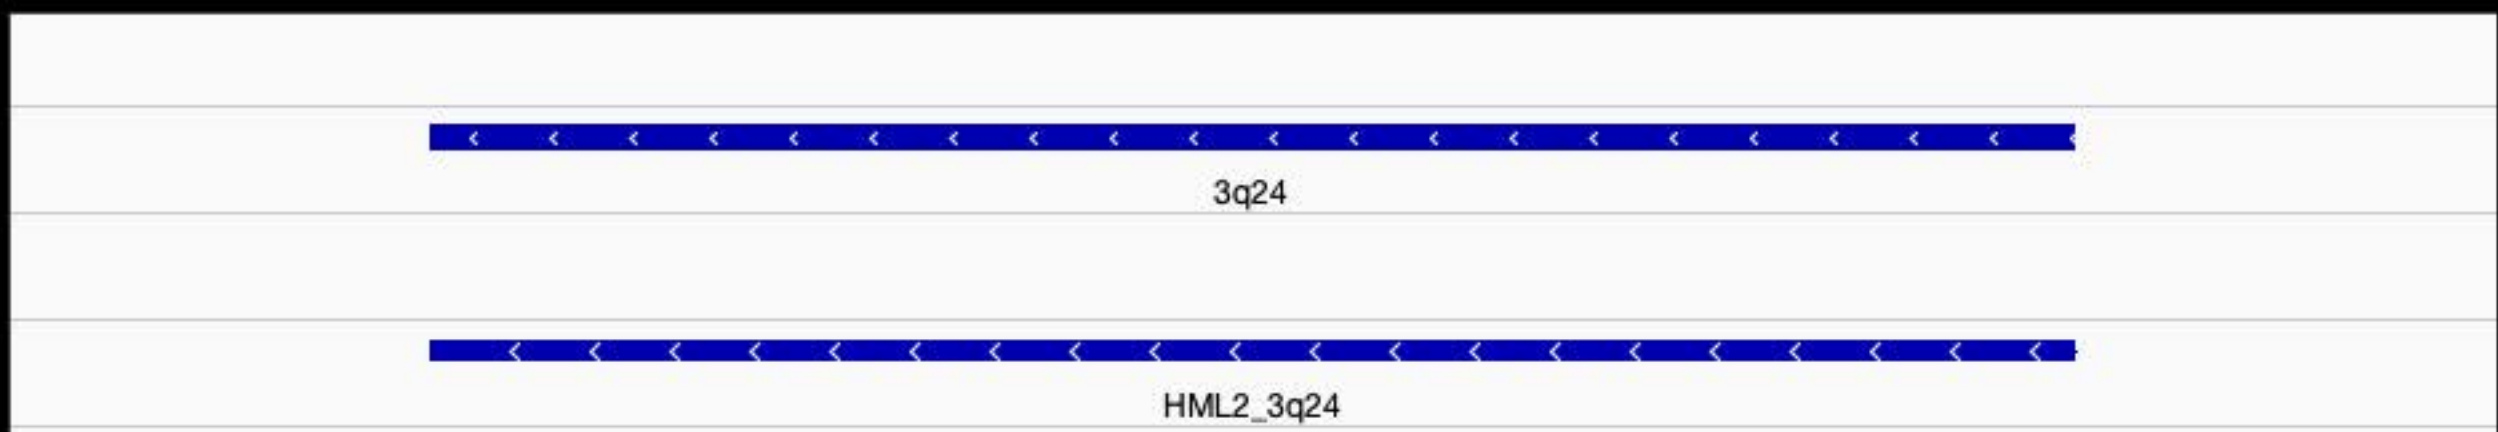

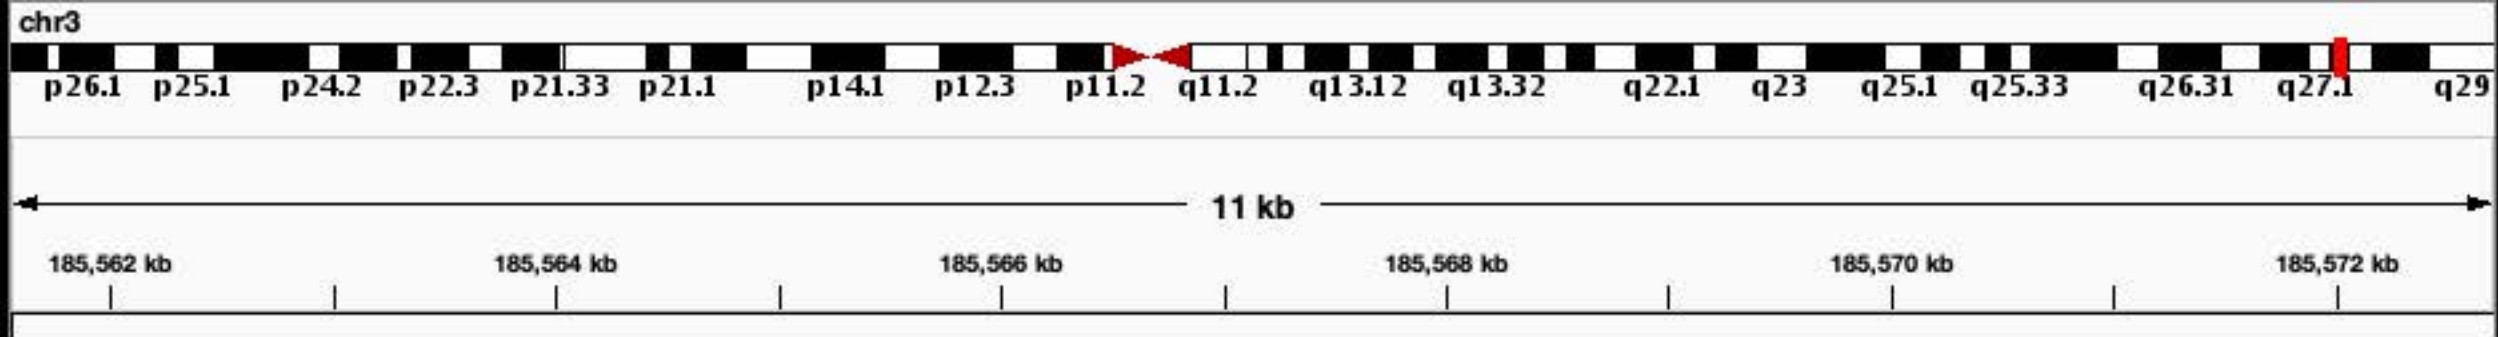

Gene

hg38.subramanianT1.gtf

hg38.subramanianT2.gtf

transcripts.gtf

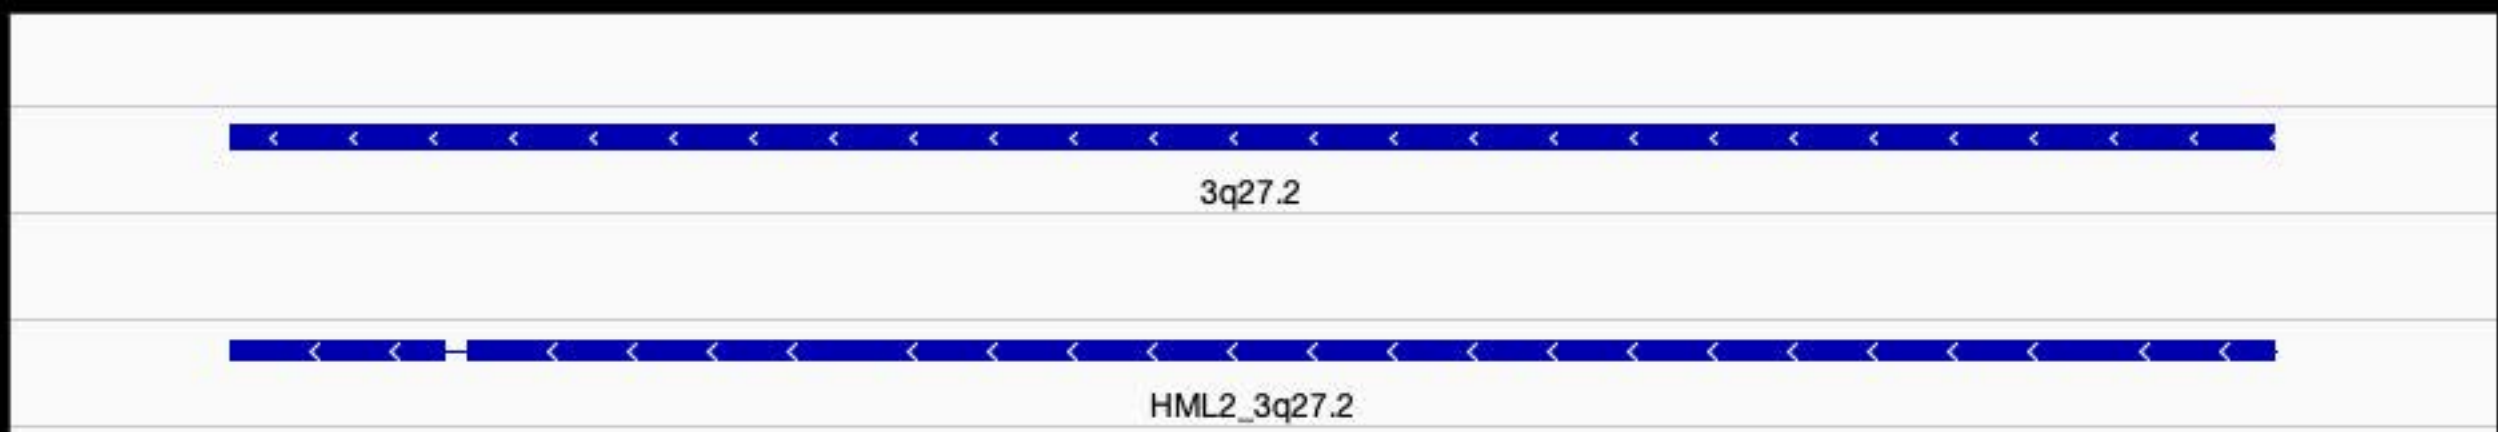

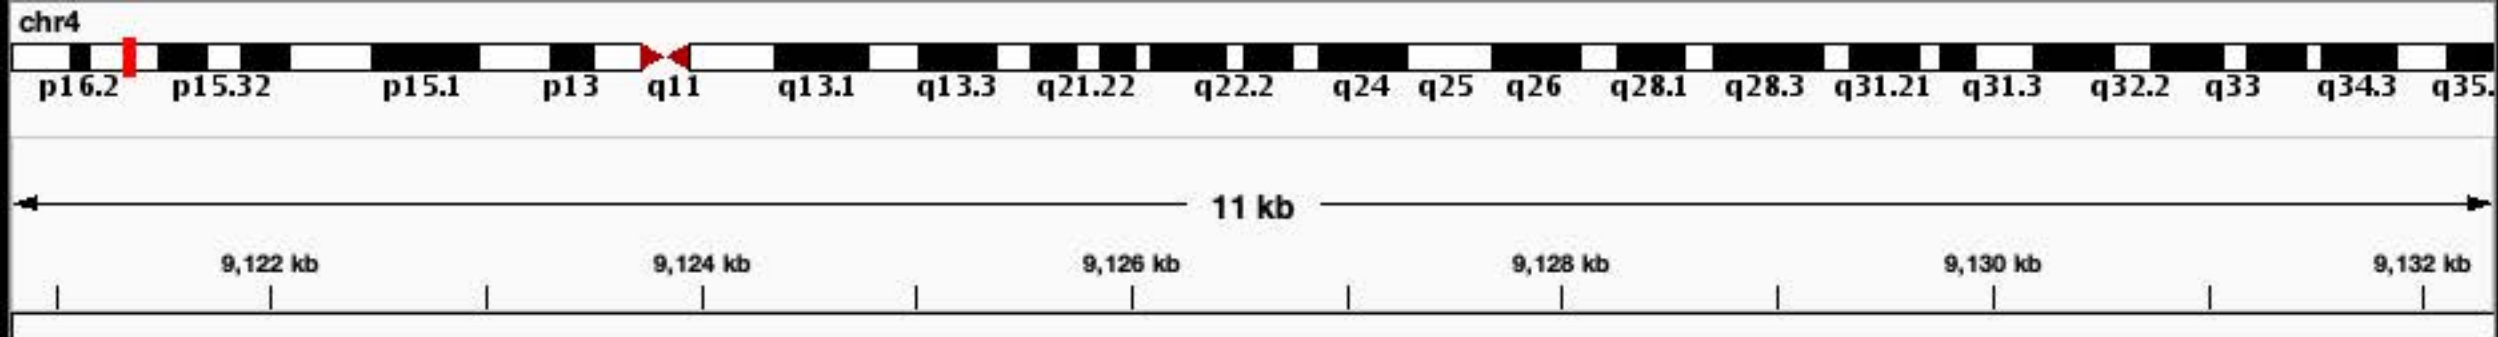

Gene

hg38.subramanianT1.gtf

hg38.subramanianT2.gtf

transcripts.gtf

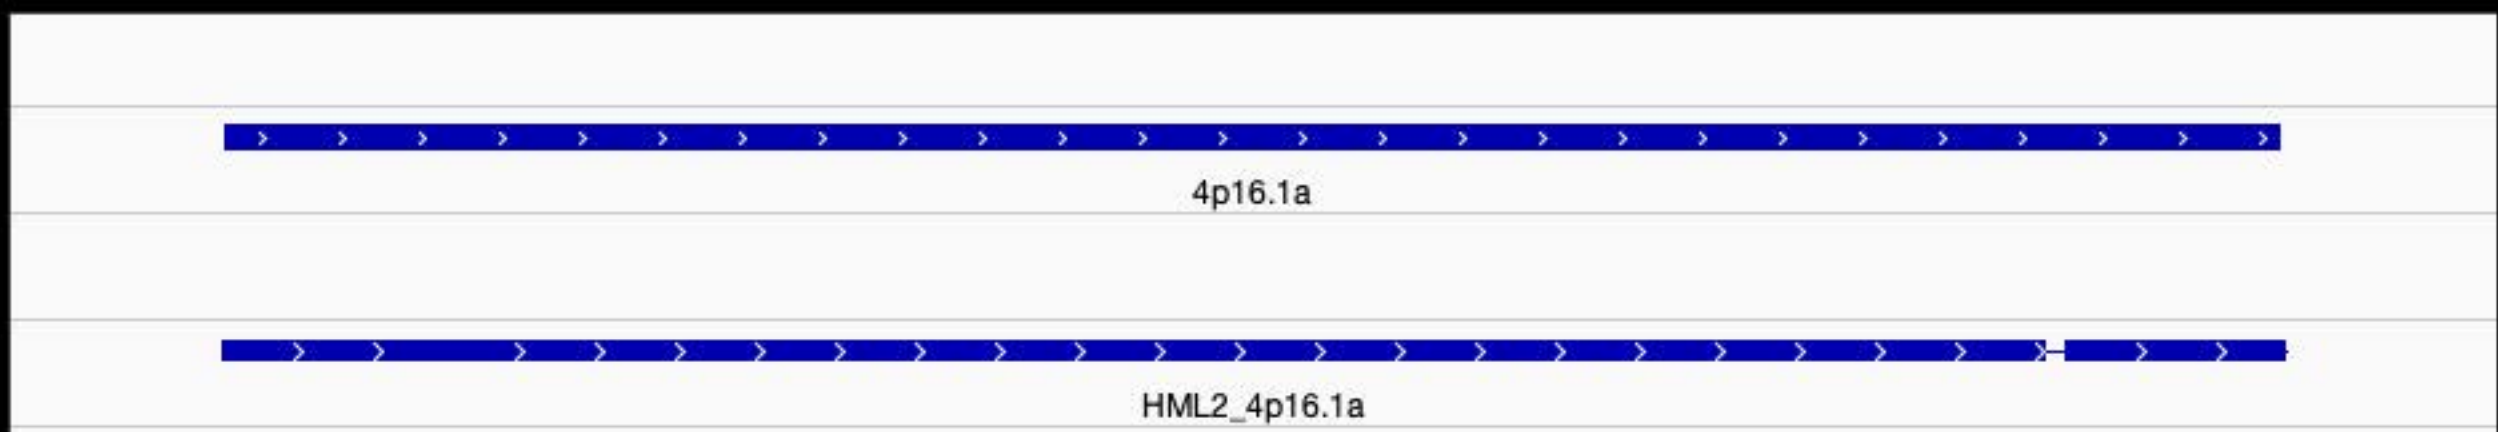



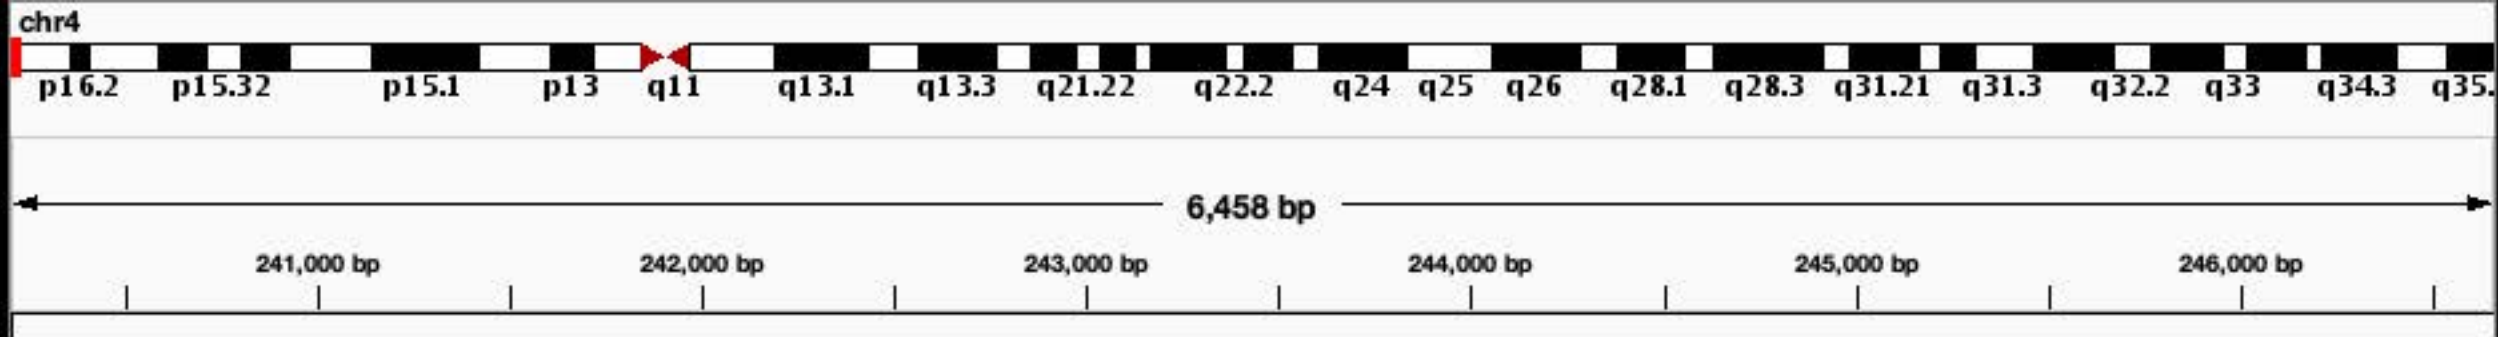

Gene

hg38.subramanianT1.gtf

hg38.subramanianT2.gtf

transcripts.gtf

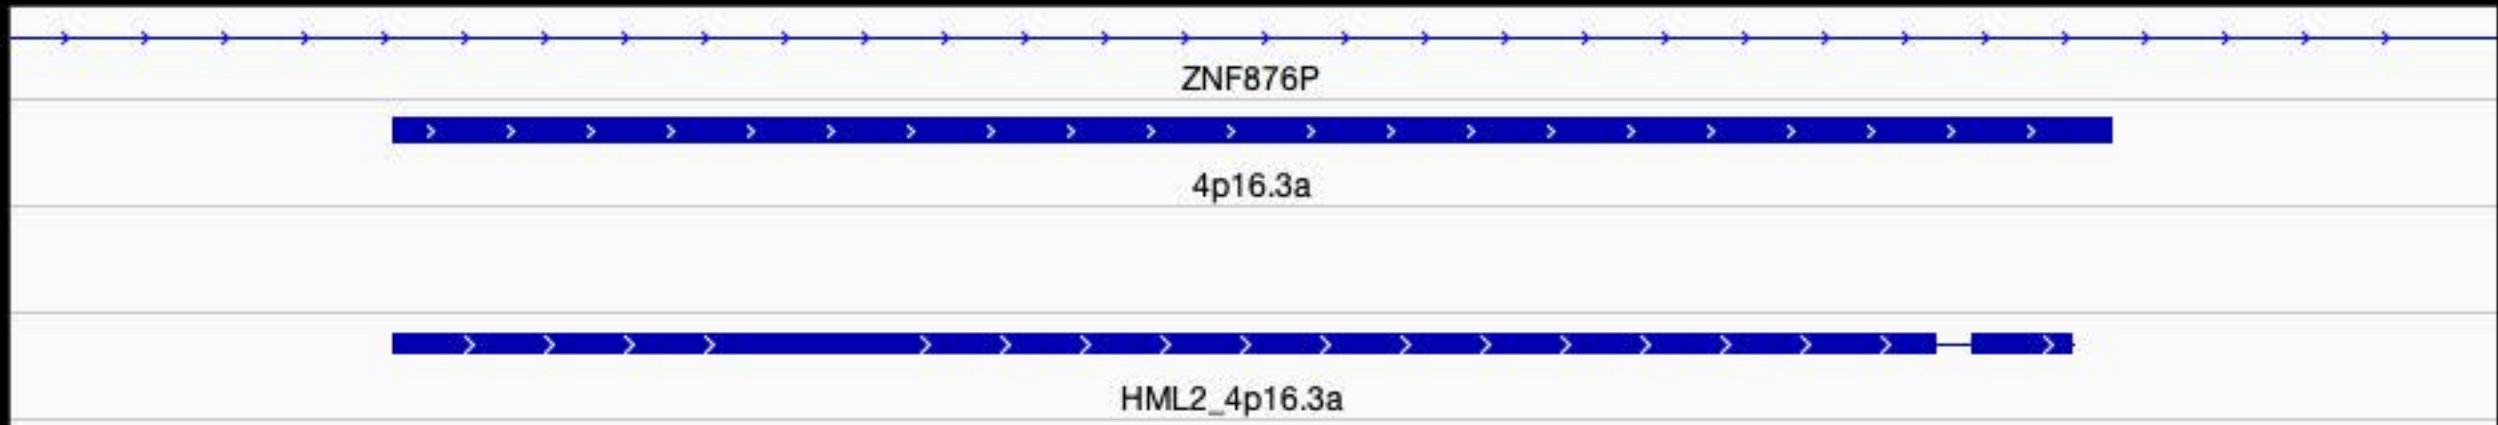

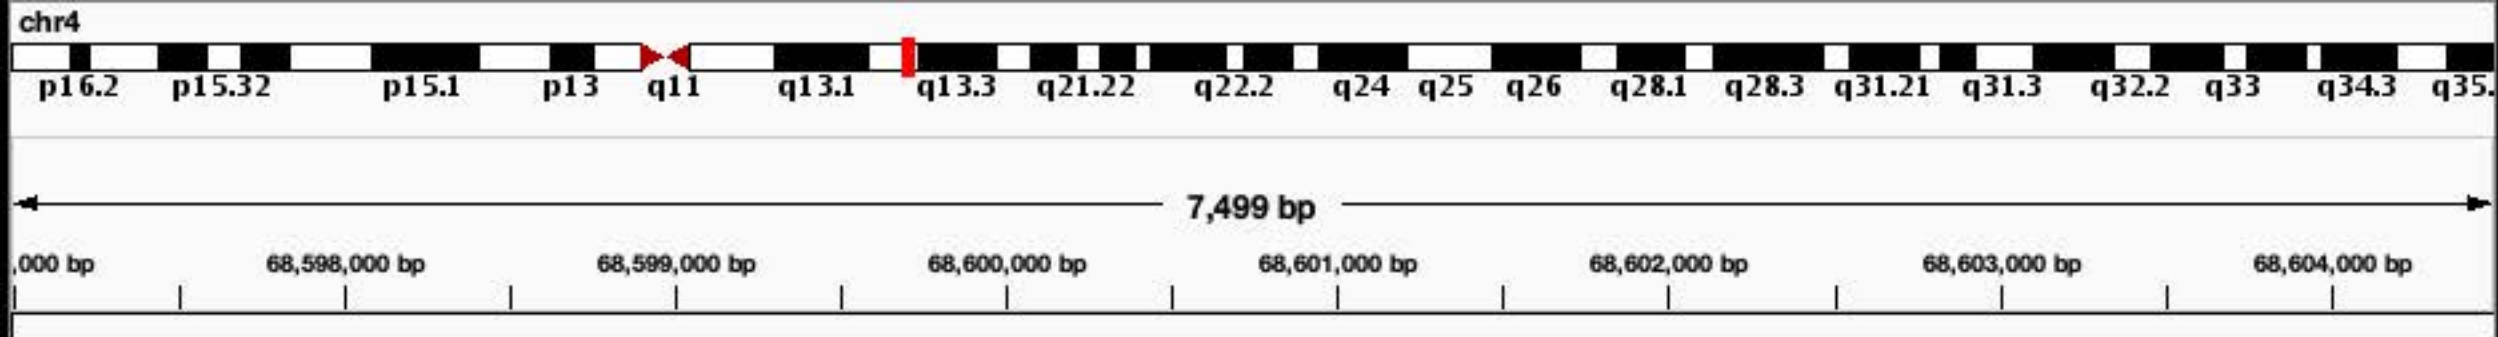

Gene

hg38.subramanianT1.gtf

hg38.subramanianT2.gtf

transcripts.gtf

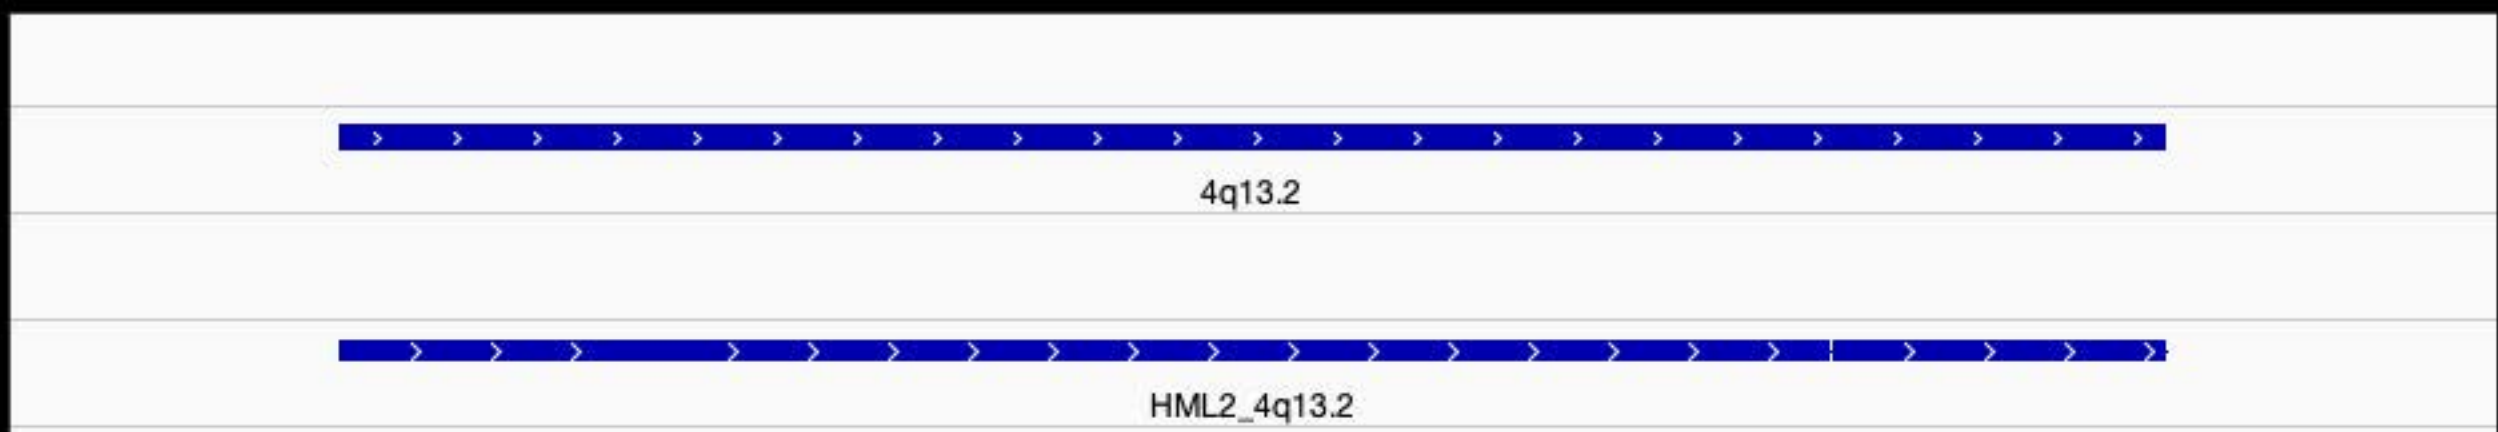

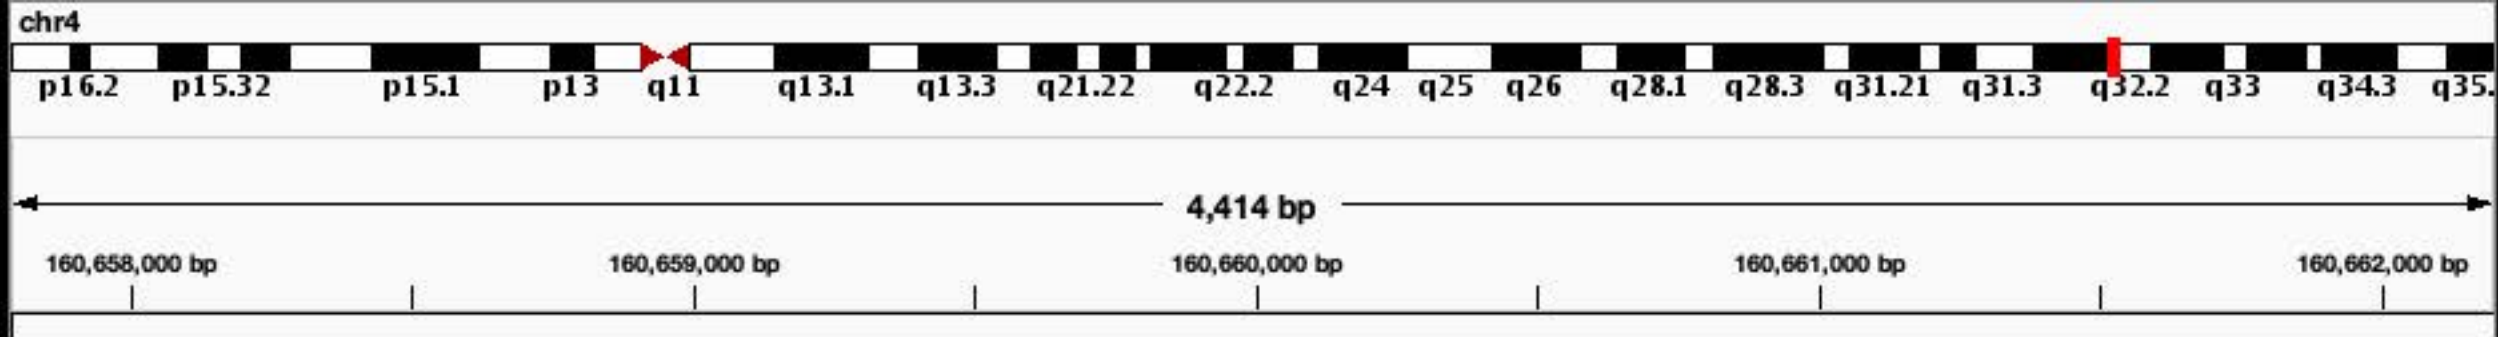

Gene

hg38.subramanianT1.gtf

hg38.subramanianT2.gtf

transcripts.gtf

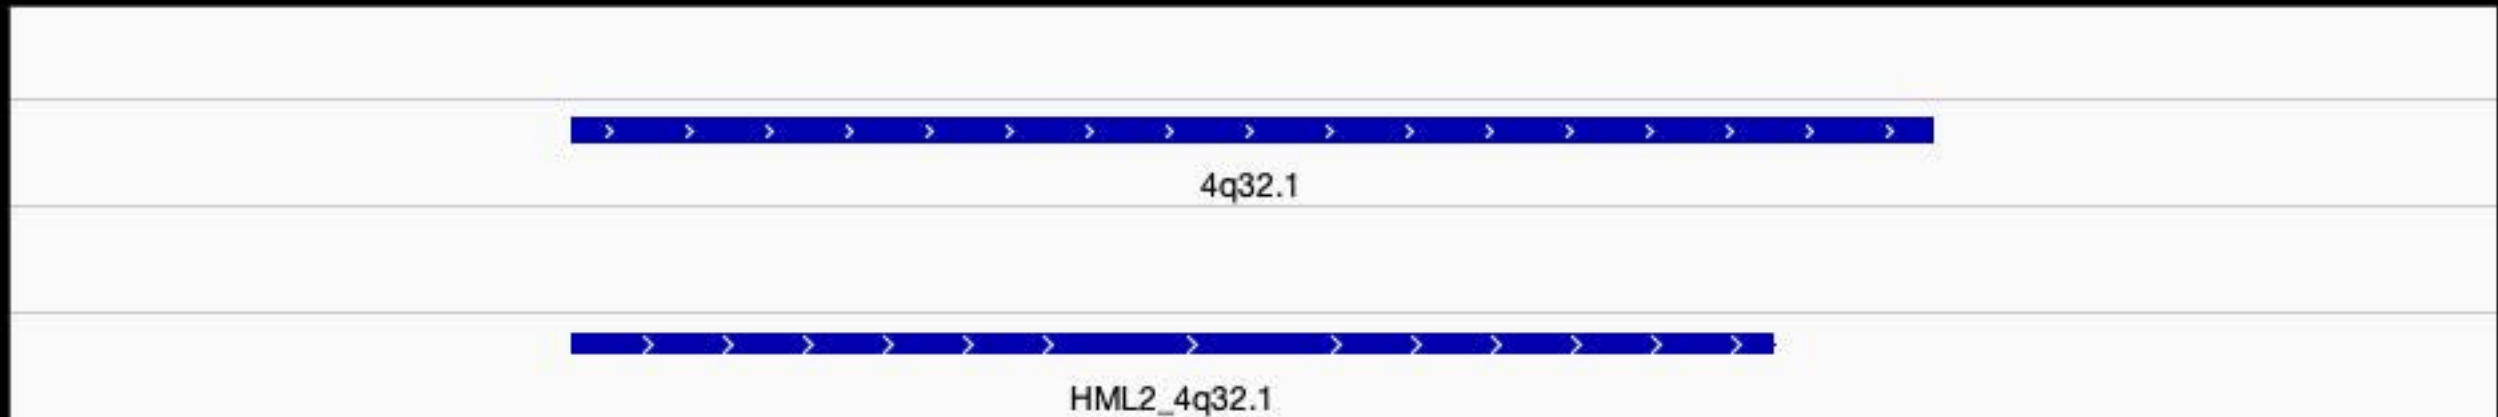

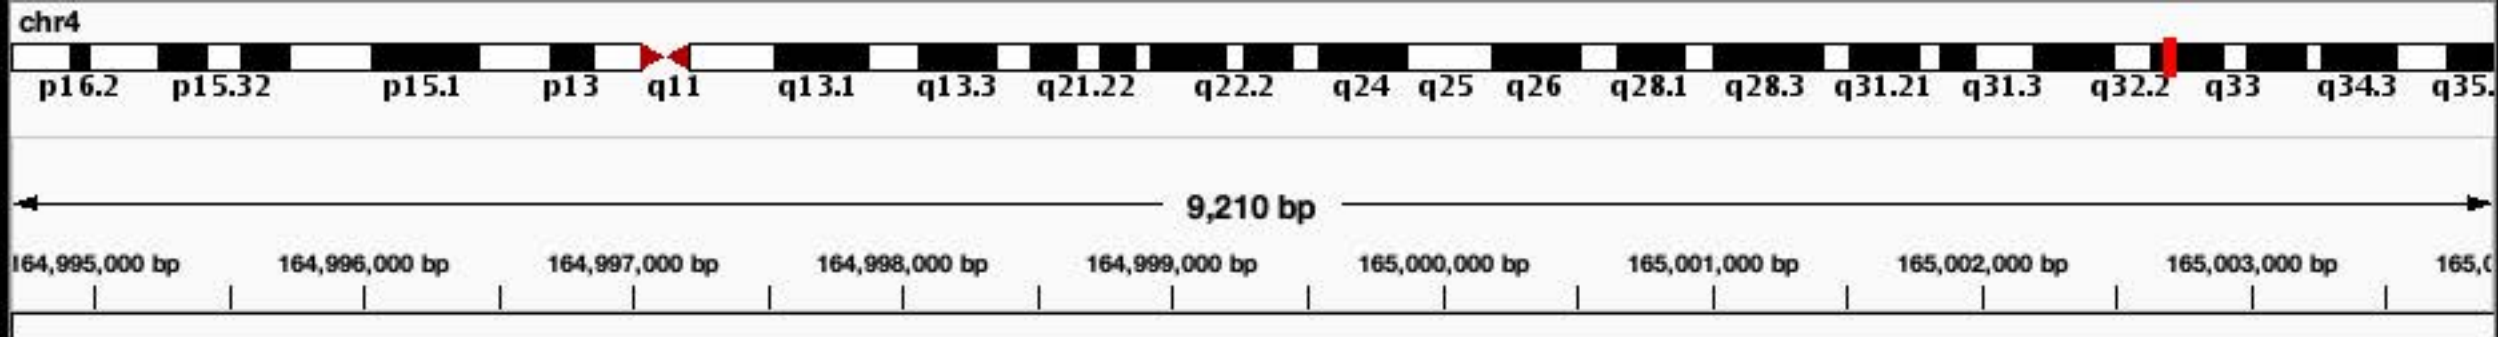

Gene

hg38.subramanianT1.gtf

hg38.subramanianT2.gtf

transcripts.gtf

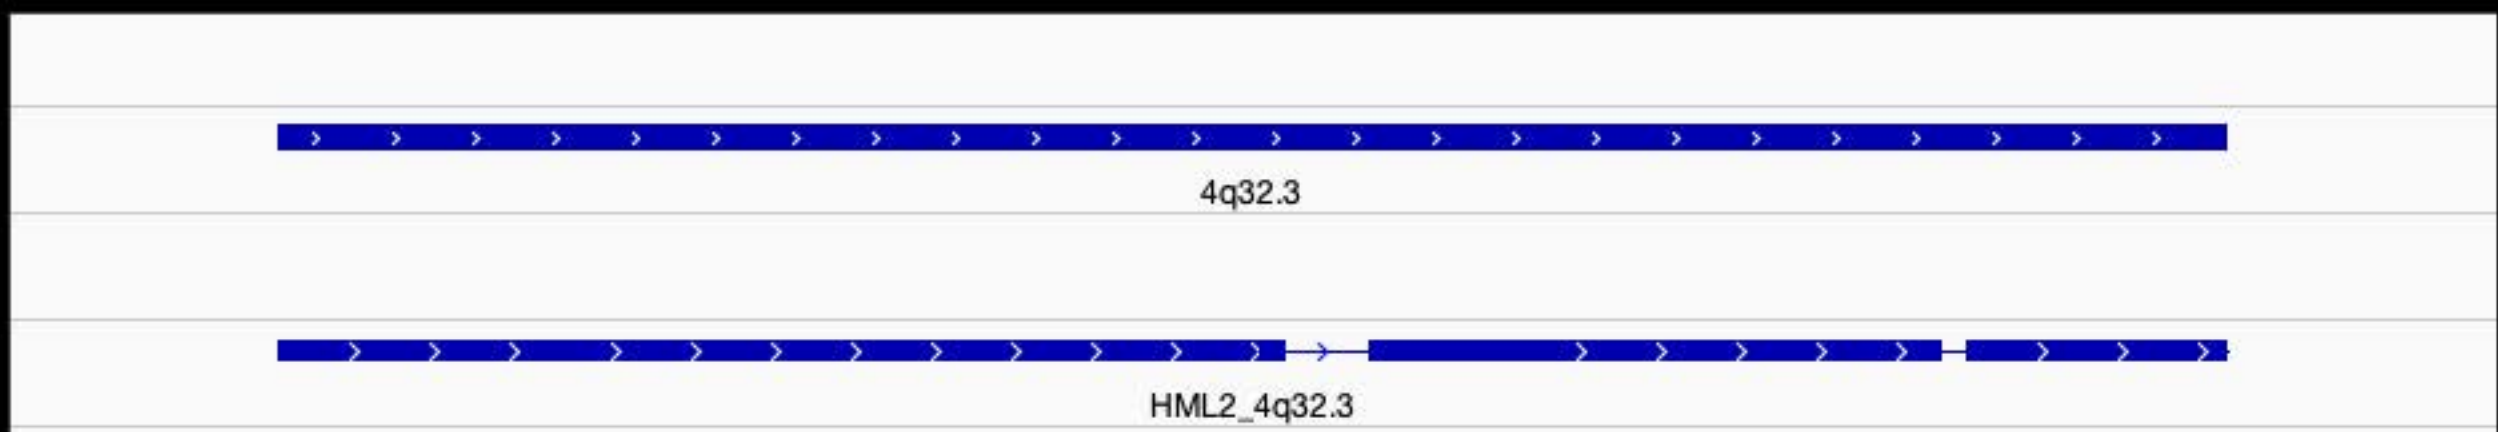

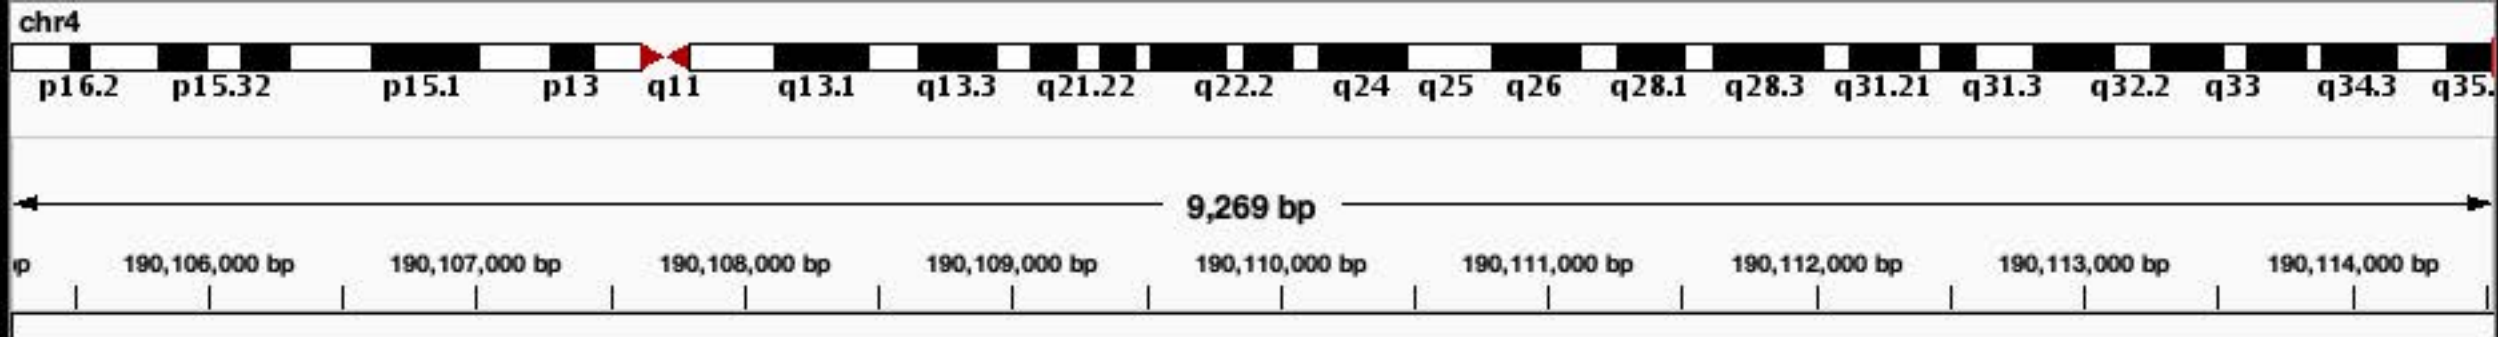

Gene

hg38.subramanianT1.gtf

hg38.subramanianT2.gtf

transcripts.gtf

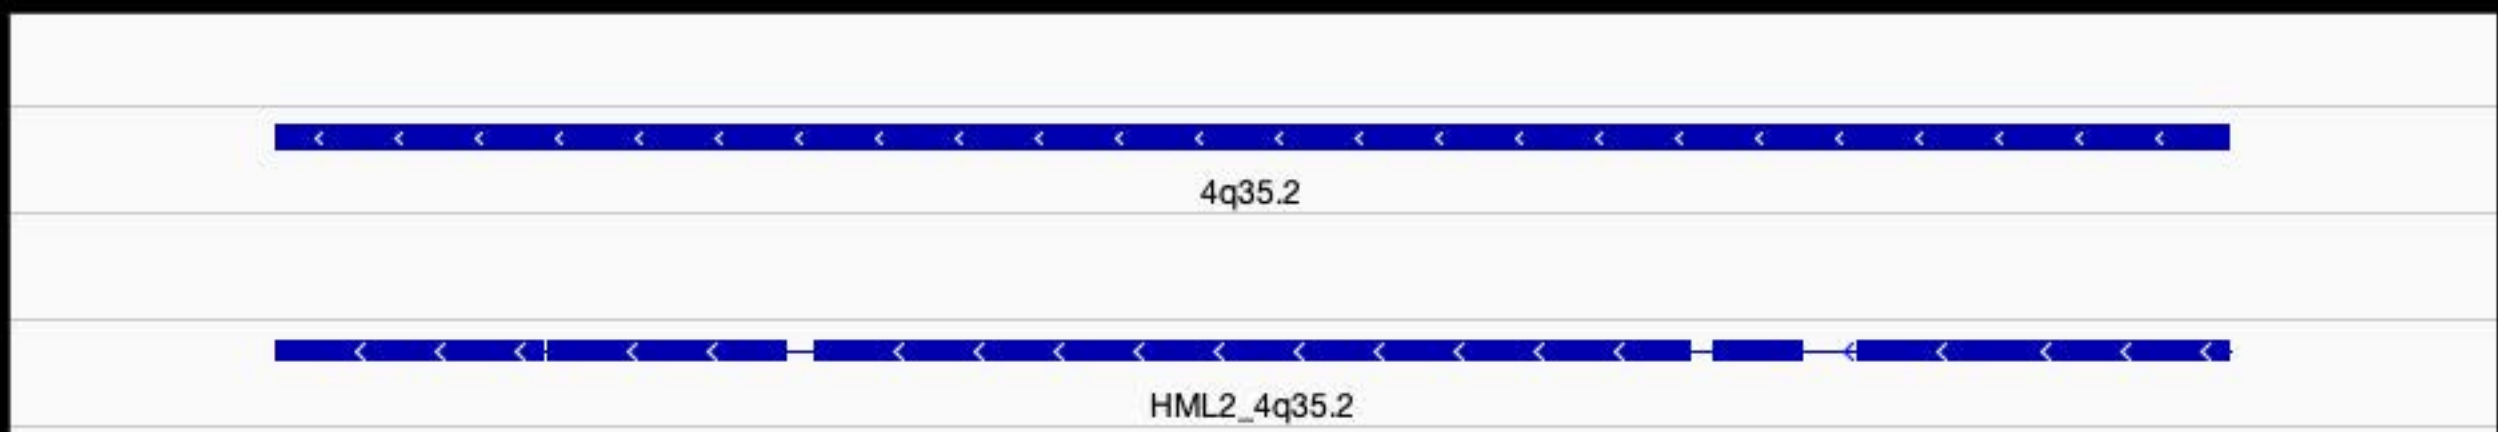

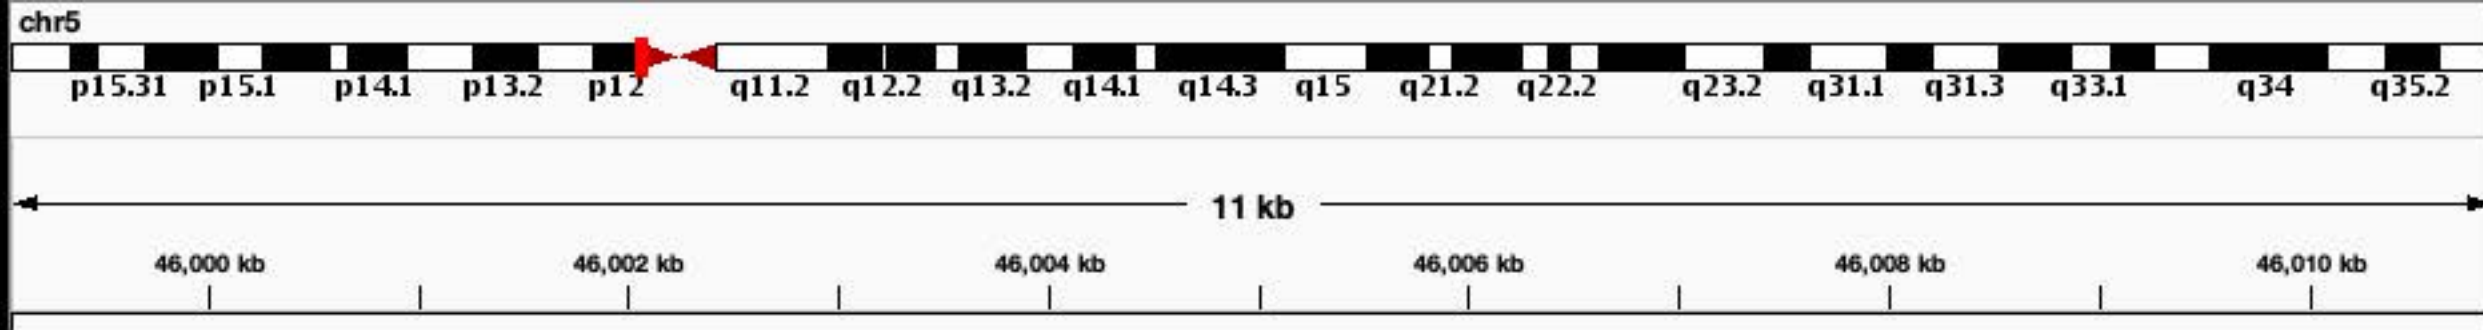

Gene

hg38.subramanianT1.gtf

hg38.subramanianT2.gtf

transcripts.gtf

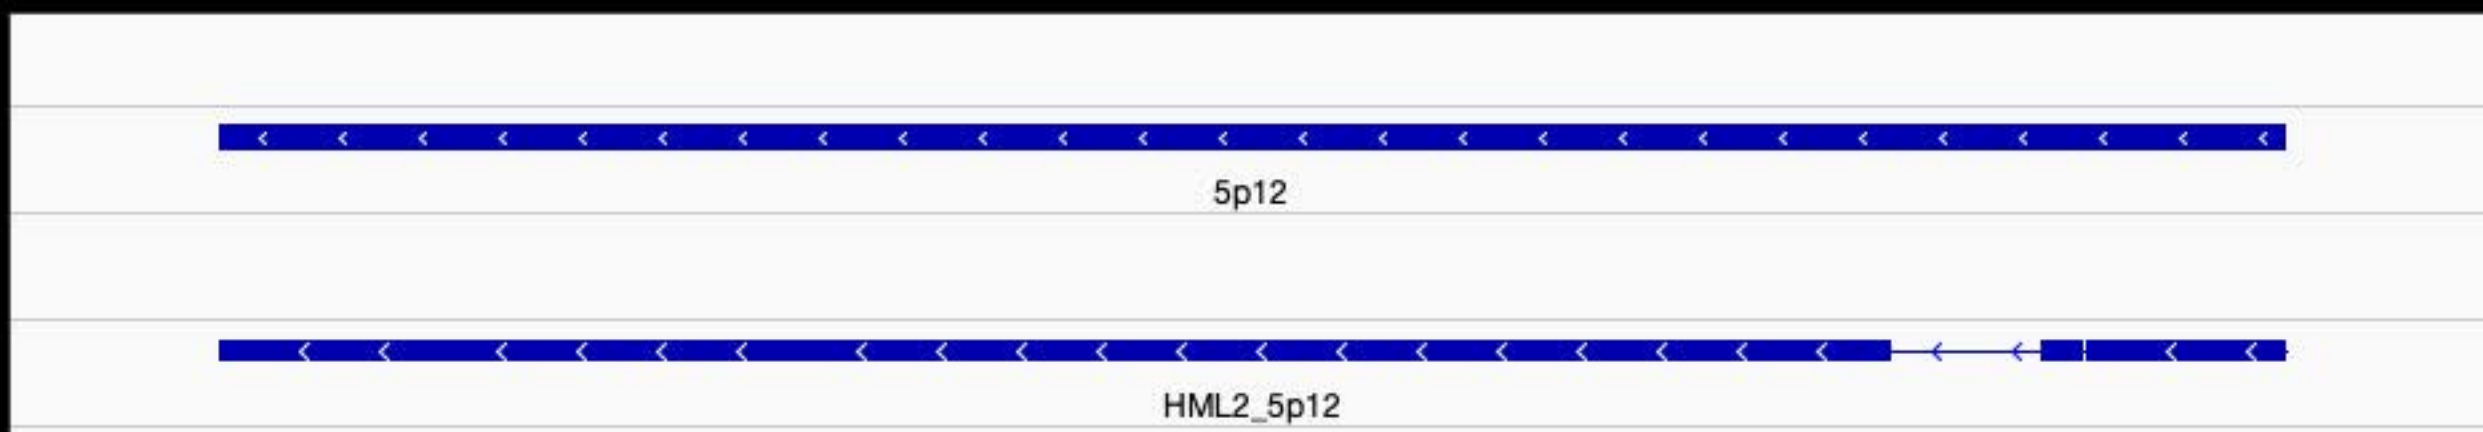

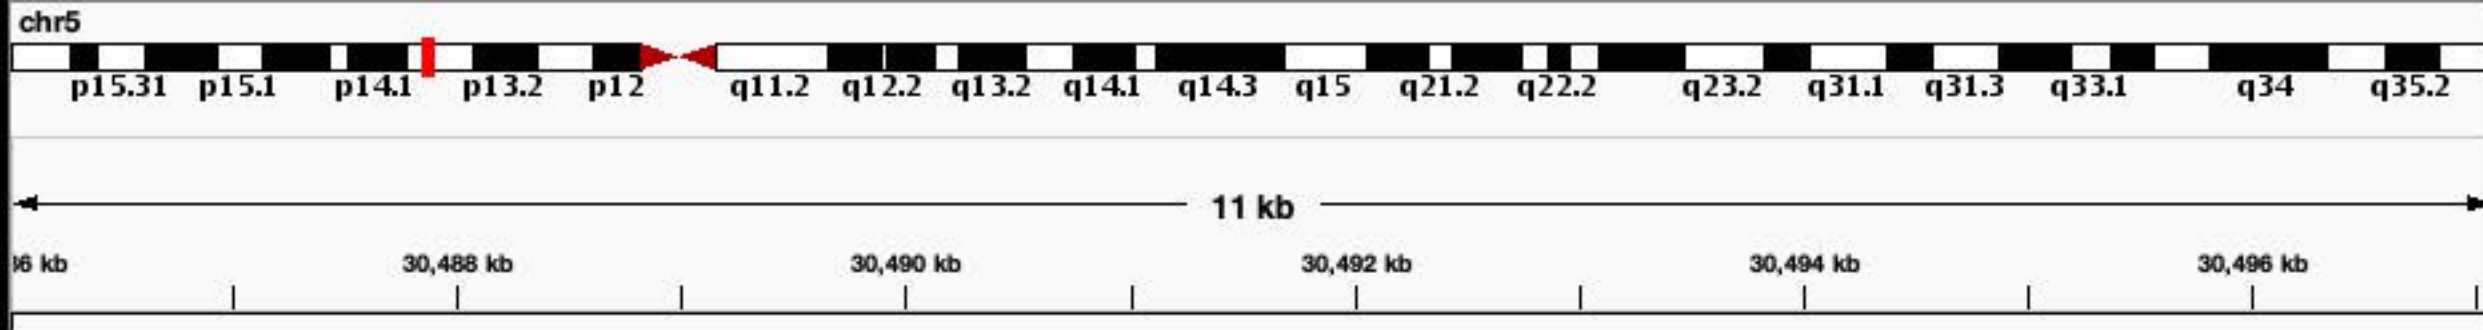

Gene

hg38.subramanianT1.gtf

hg38.subramanianT2.gtf

transcripts.gtf

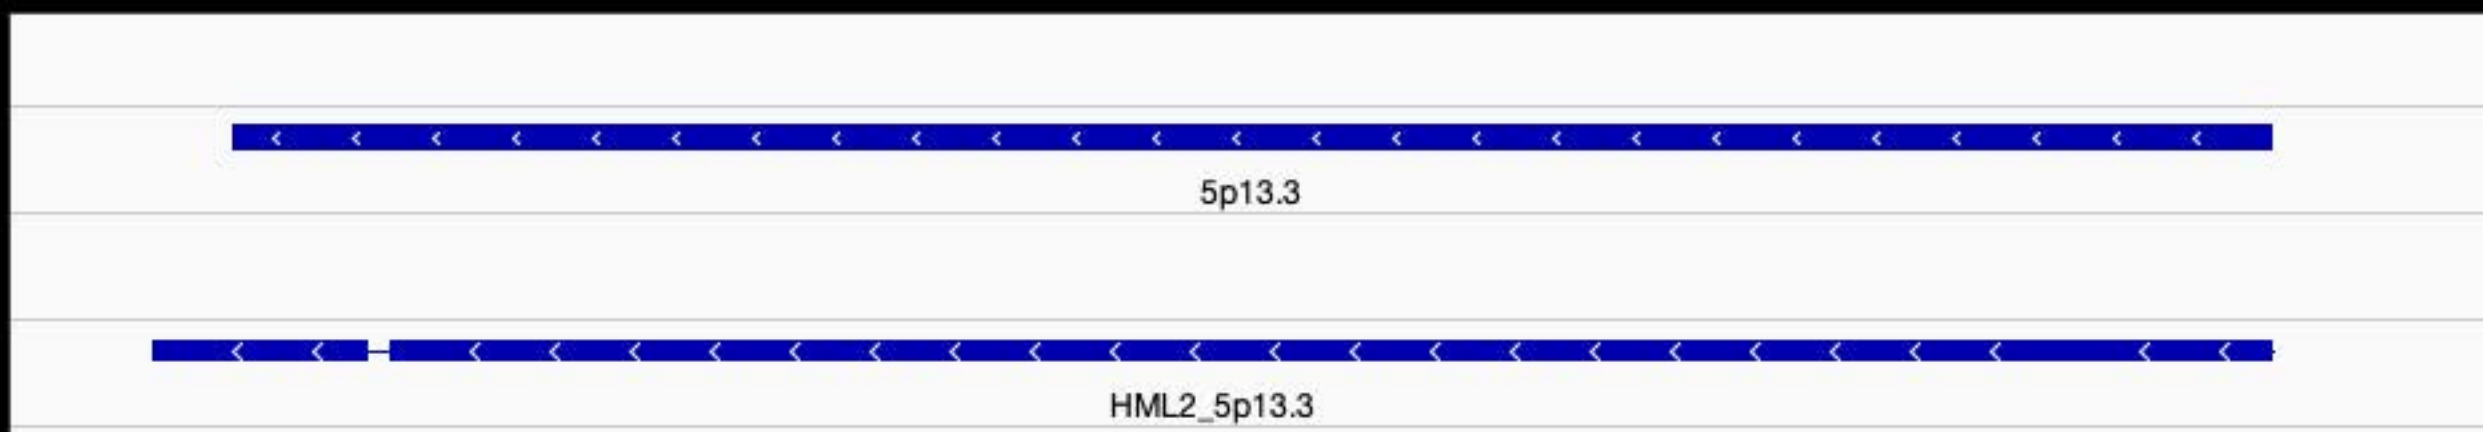

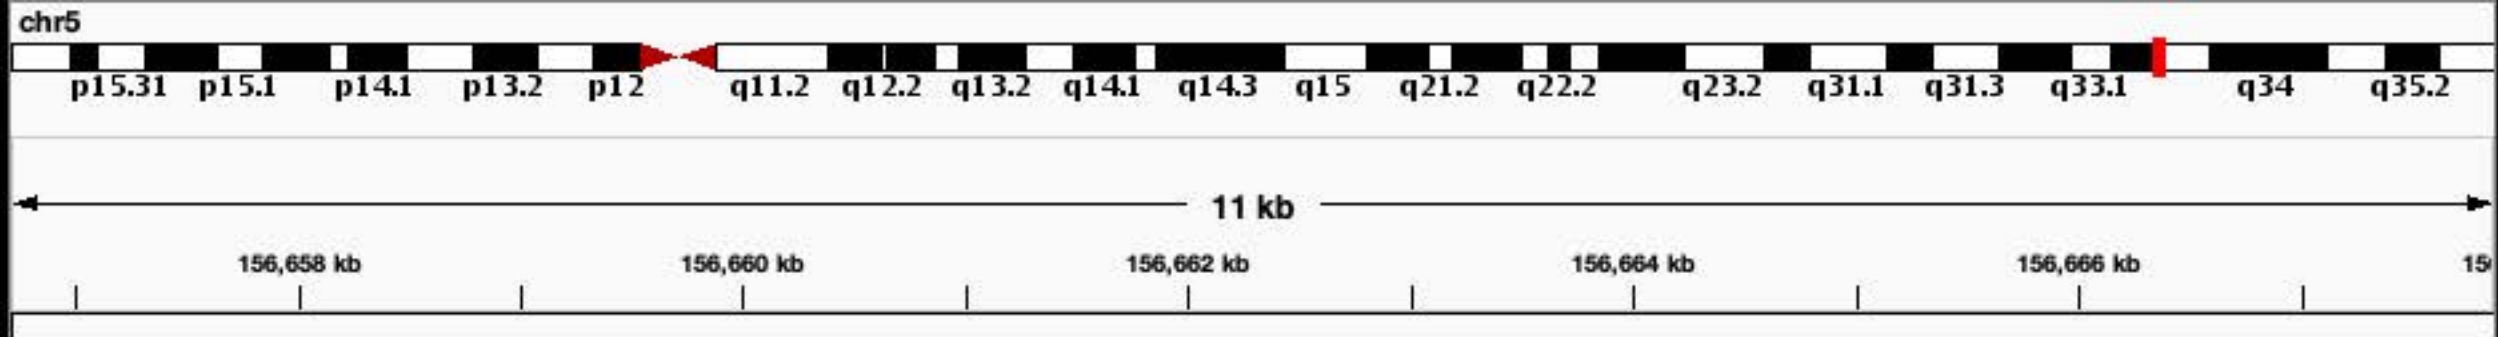

Gene

hg38.subramanianT1.gtf

hg38.subramanianT2.gtf

transcripts.gtf

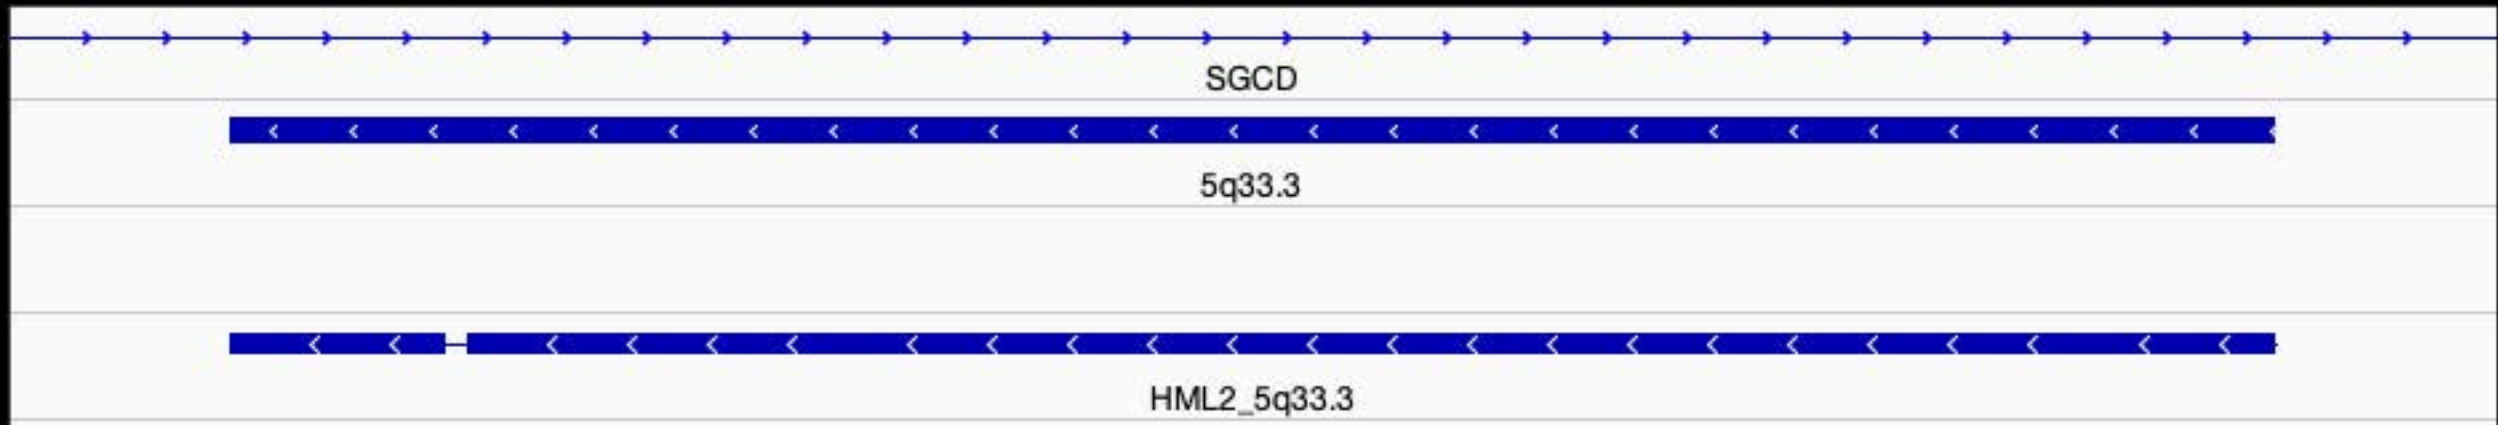



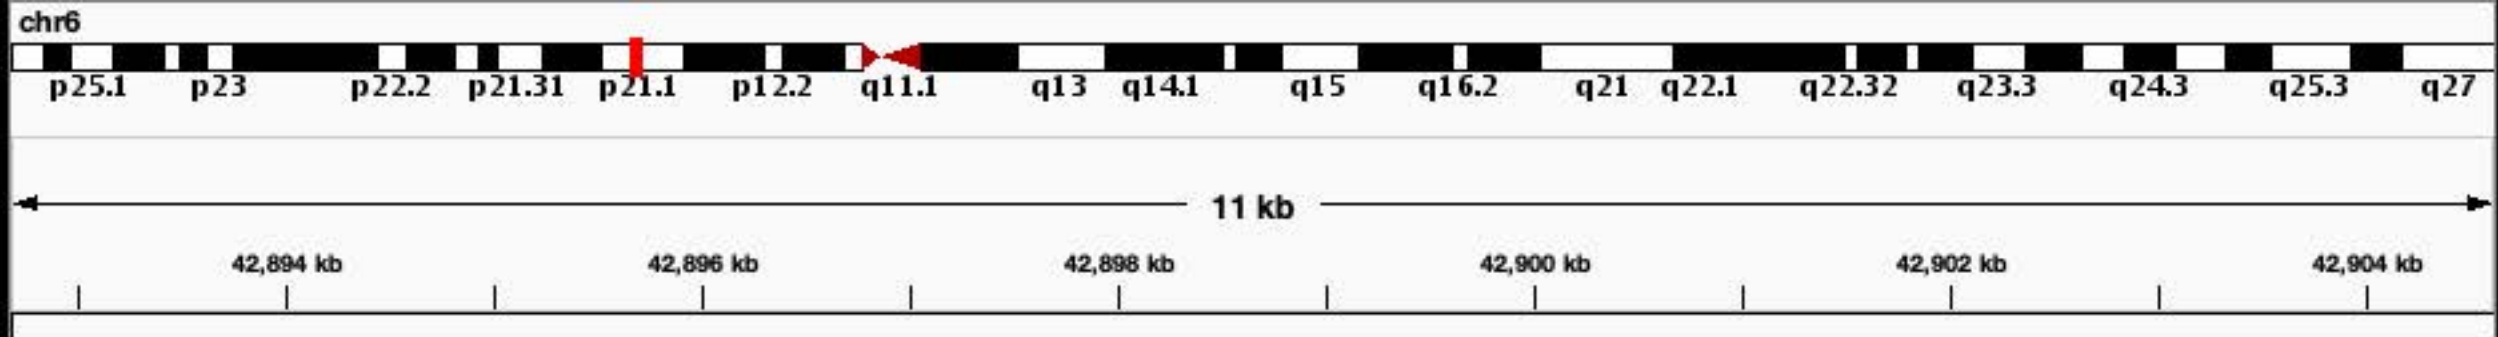

Gene

hg38.subramanianT1.gtf

hg38.subramanianT2.gtf

transcripts.gtf

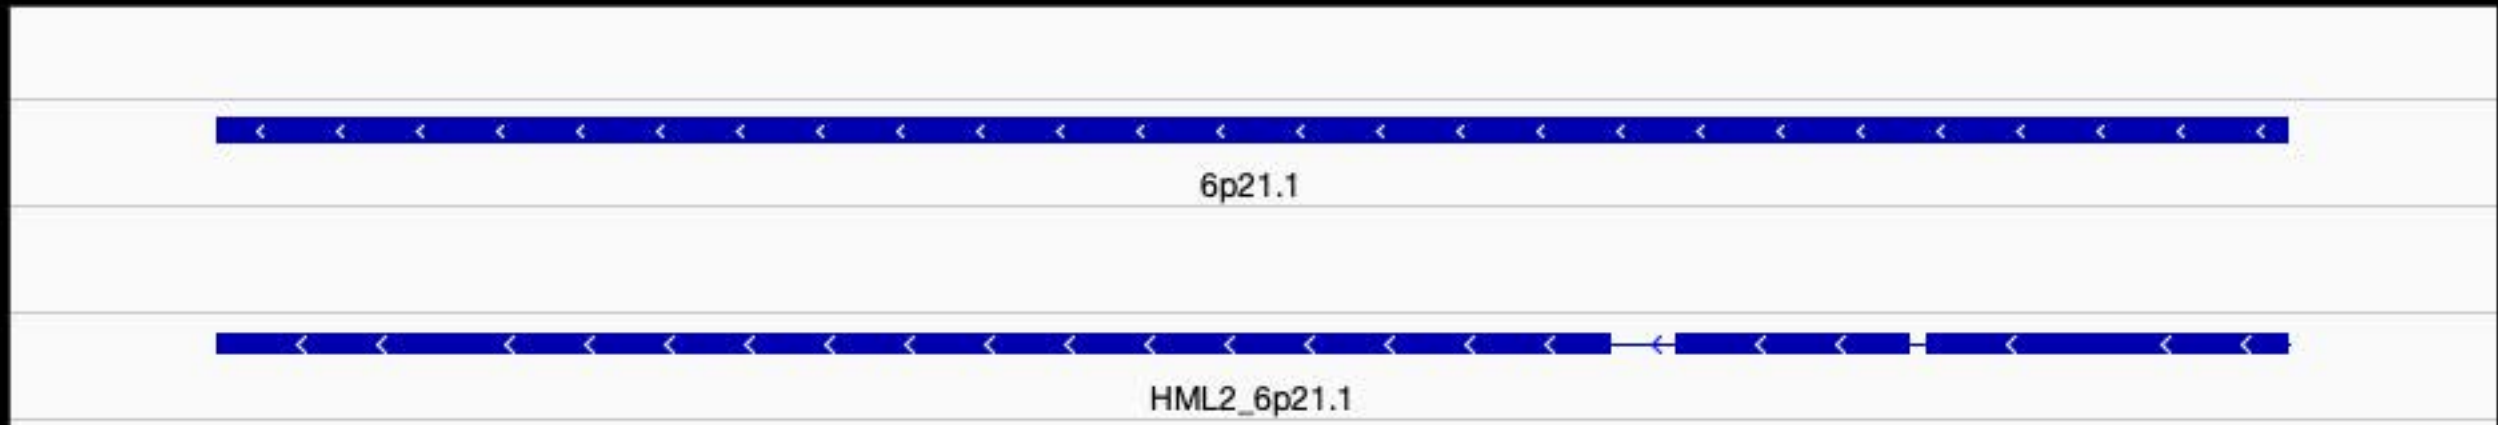

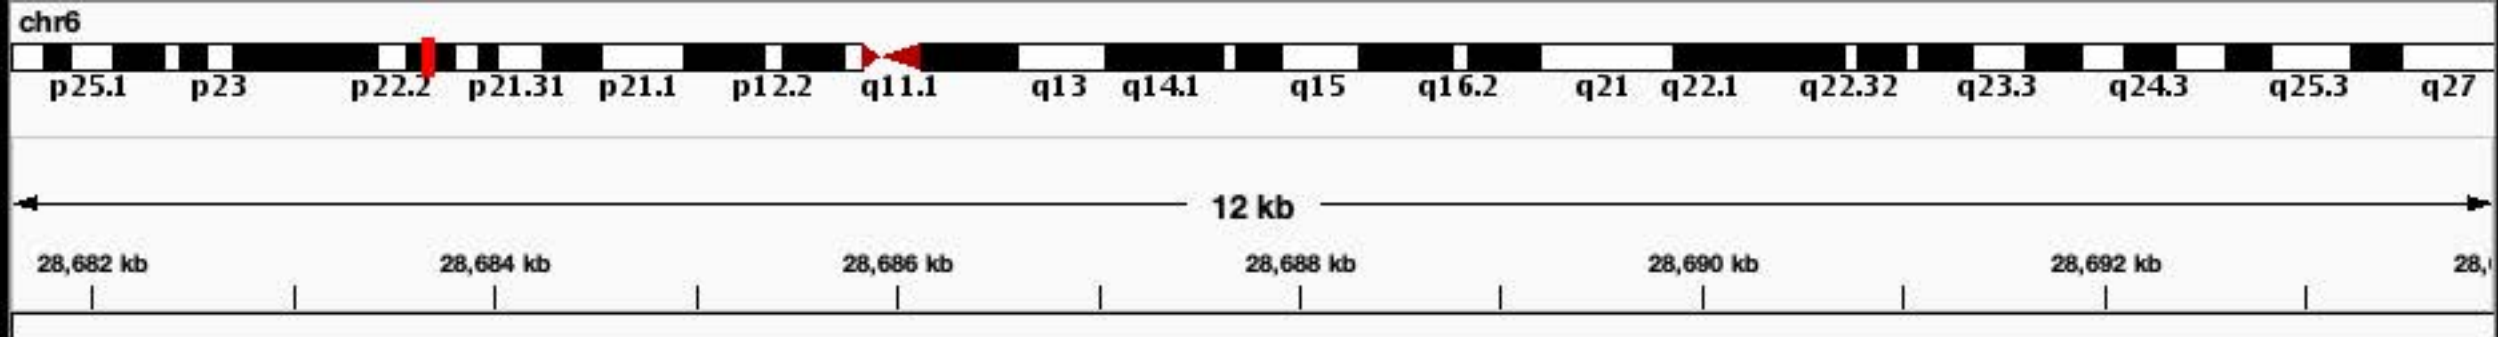

Gene

hg38.subramanianT1.gtf

hg38.subramanianT2.gtf

transcripts.gtf

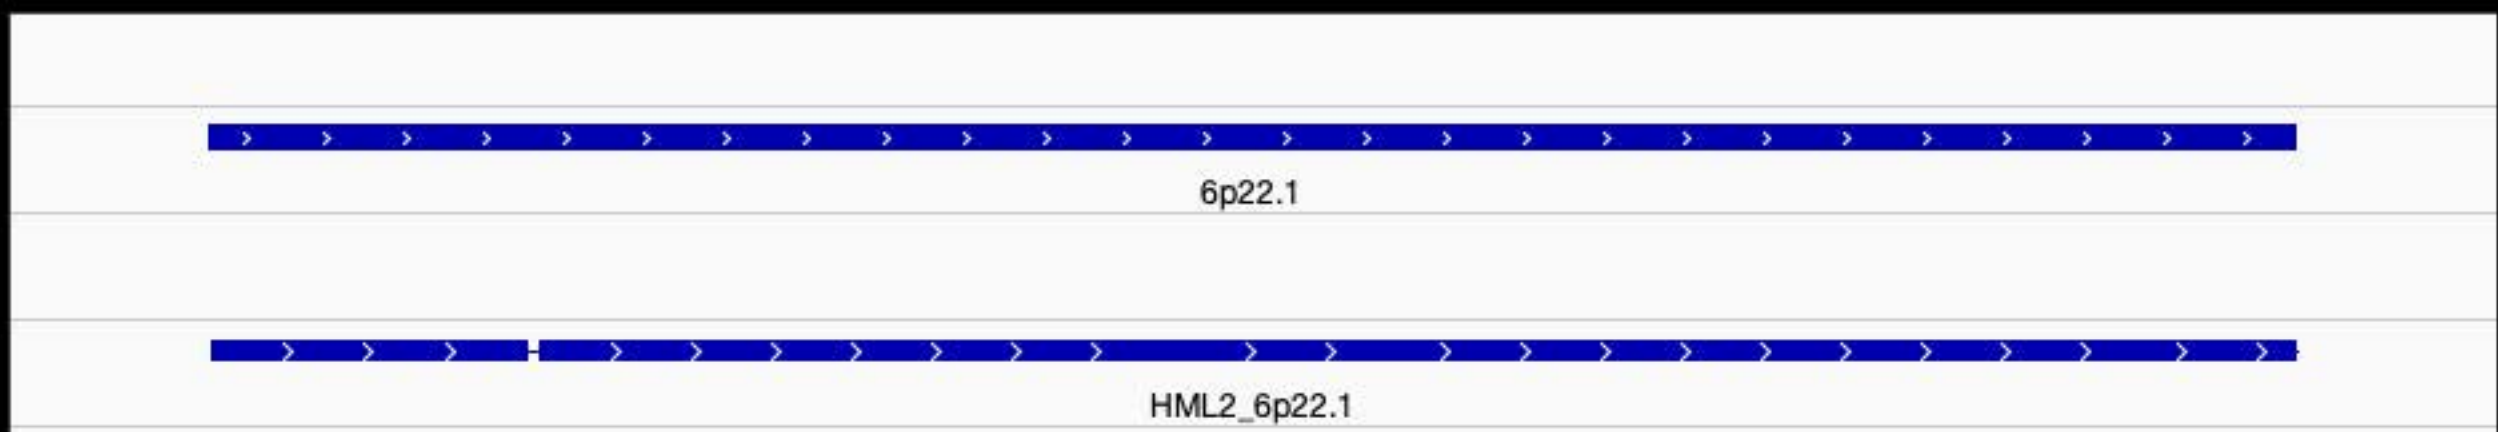

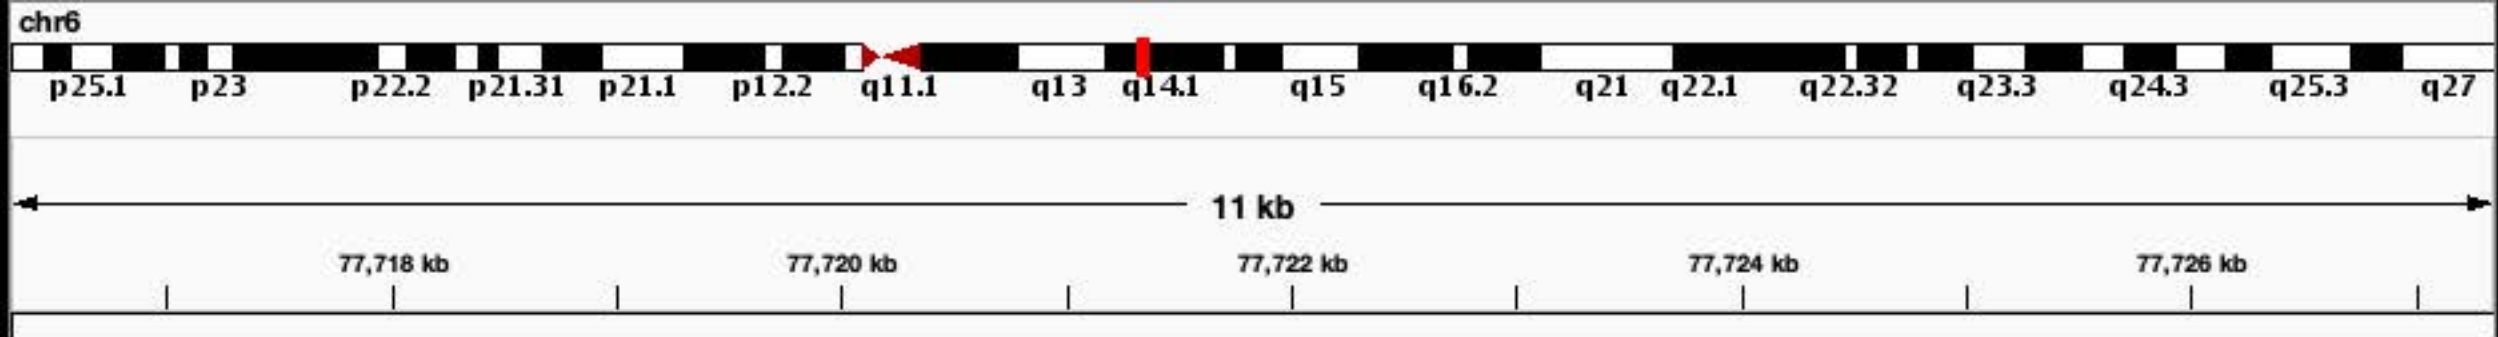

Gene

hg38.subramanianT1.gtf

hg38.subramanianT2.gtf

transcripts.gtf

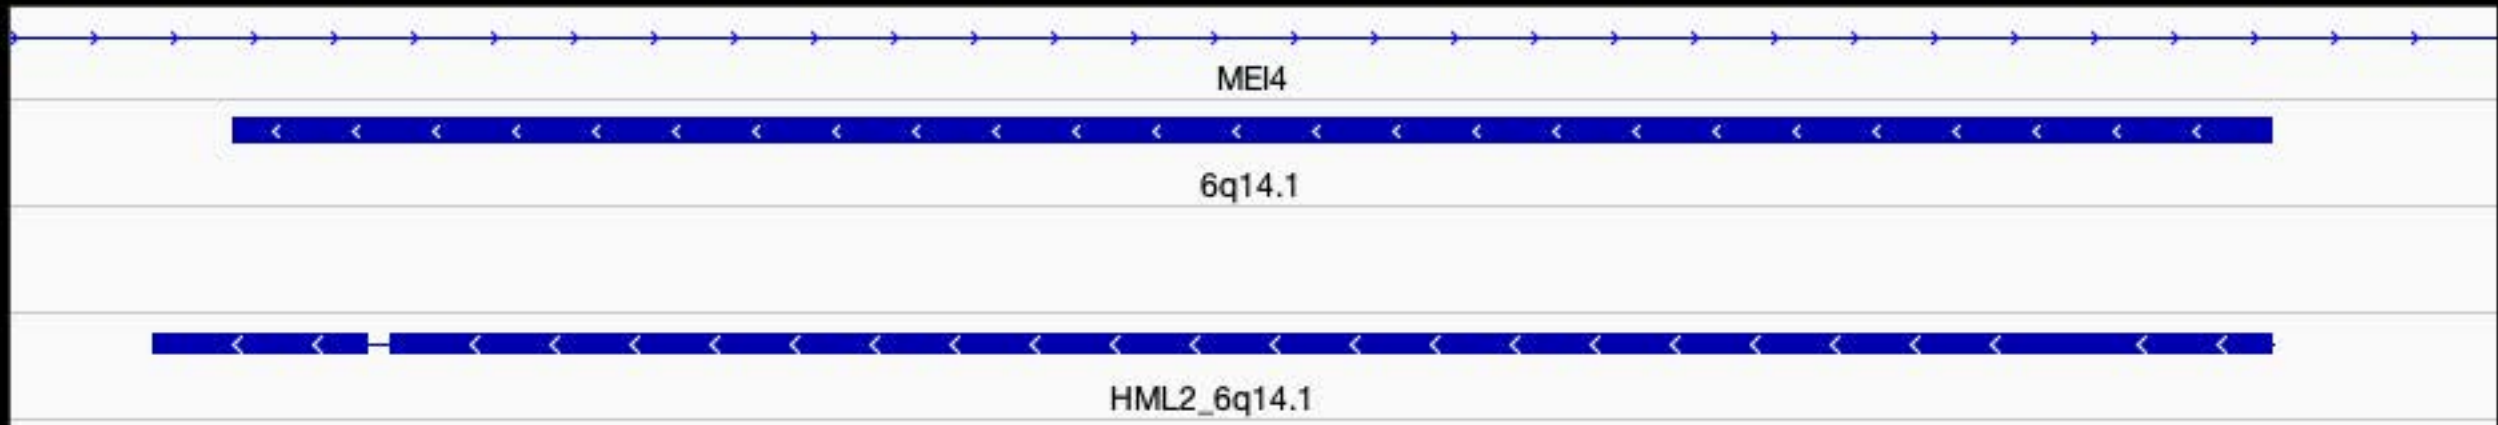

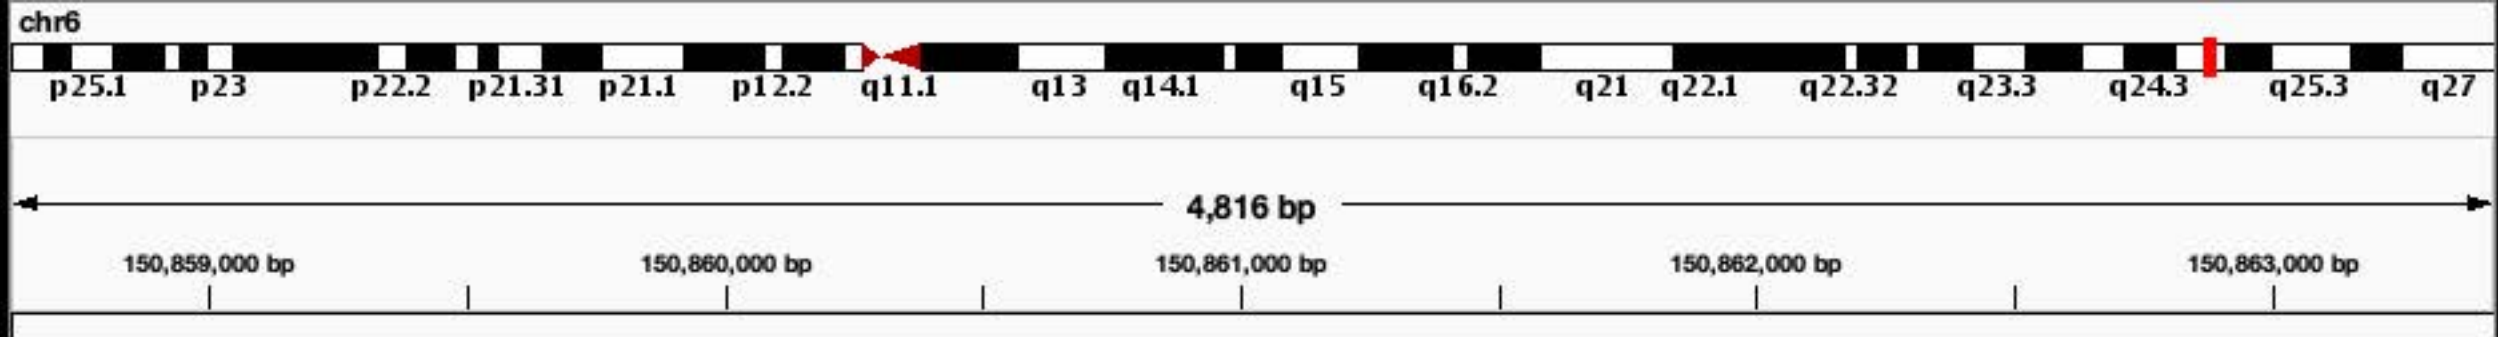

Gene

hg38.subramanianT1.gtf

hg38.subramanianT2.gtf

transcripts.gtf

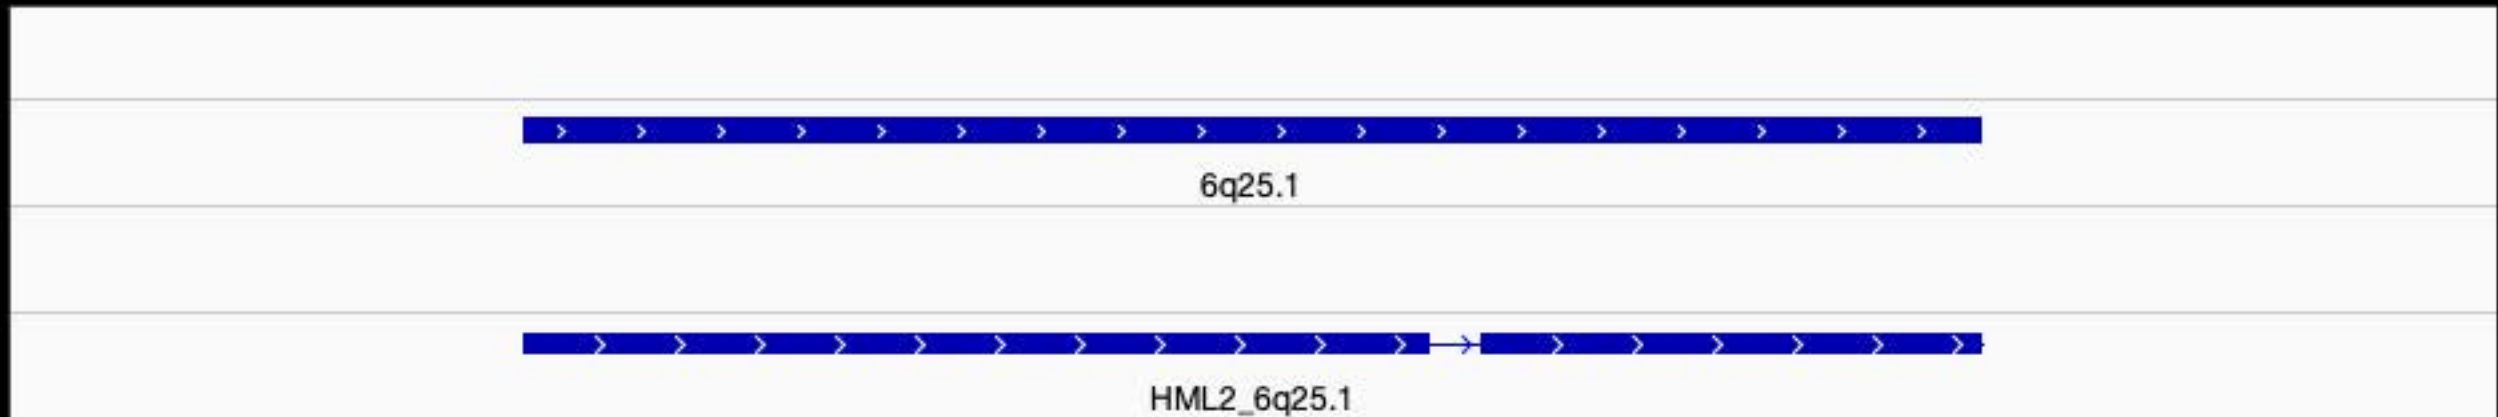

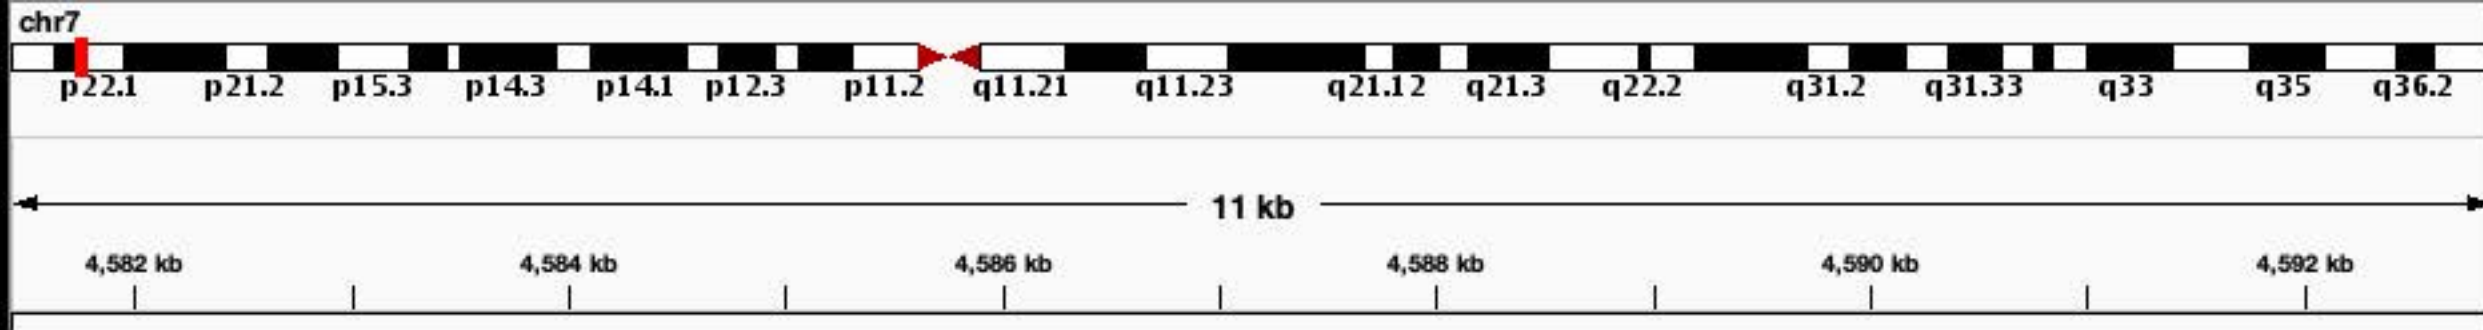

Gene

hg38.subramanianT1.gtf

hg38.subramanianT2.gtf

transcripts.gtf

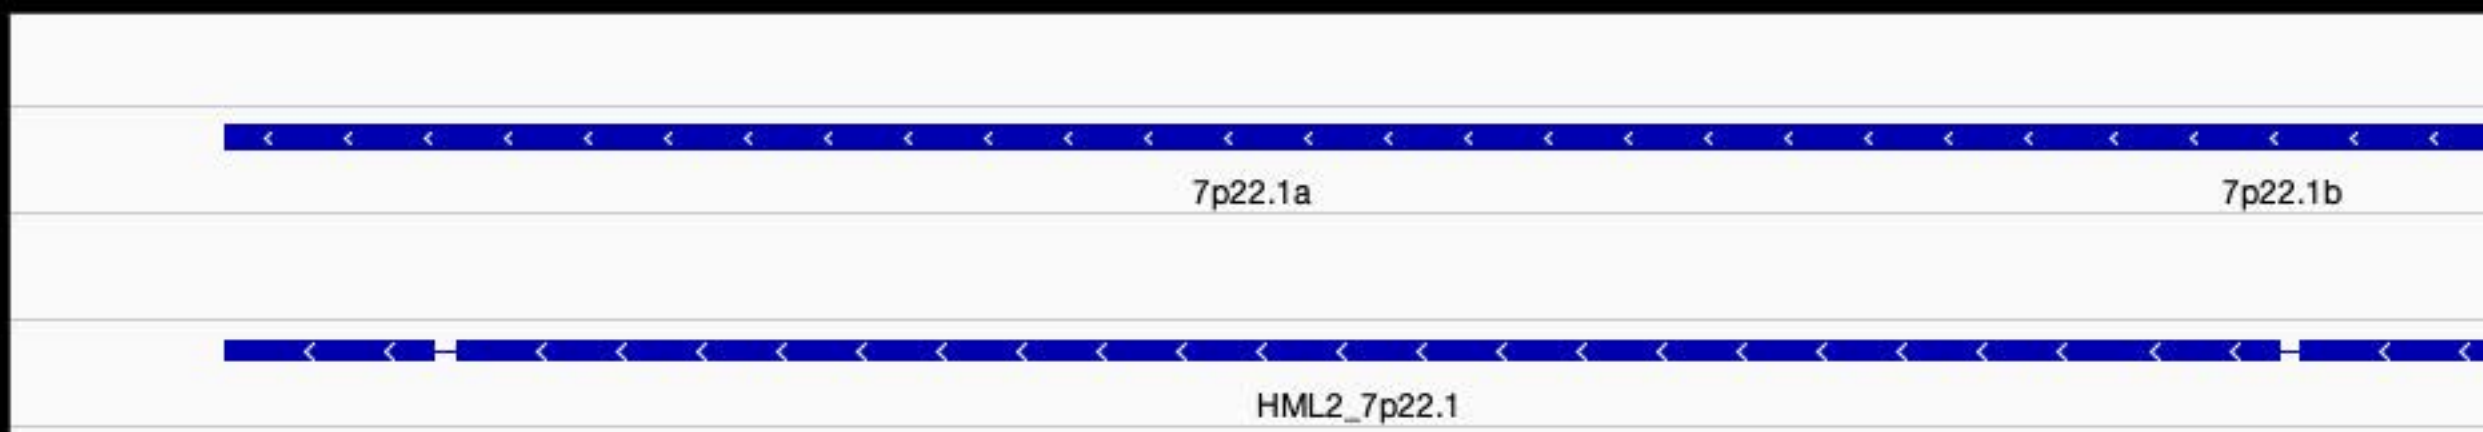

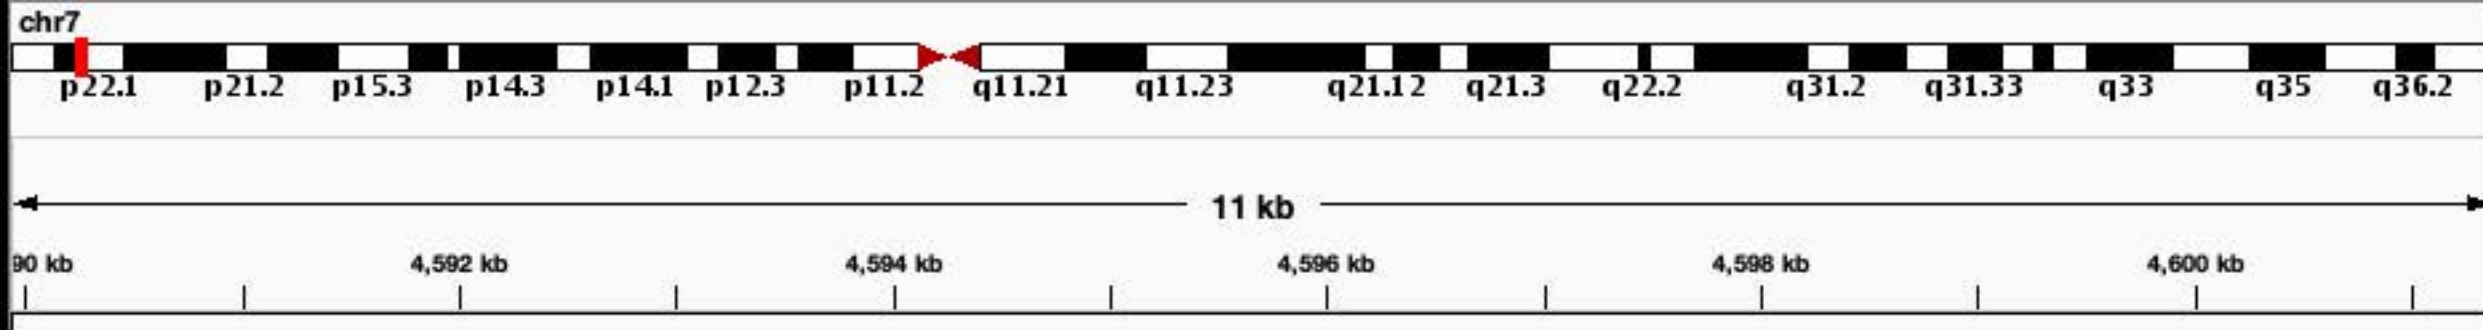

Gene

hg38.subramanianT1.gtf

hg38.subramanianT2.gtf

transcripts.gtf

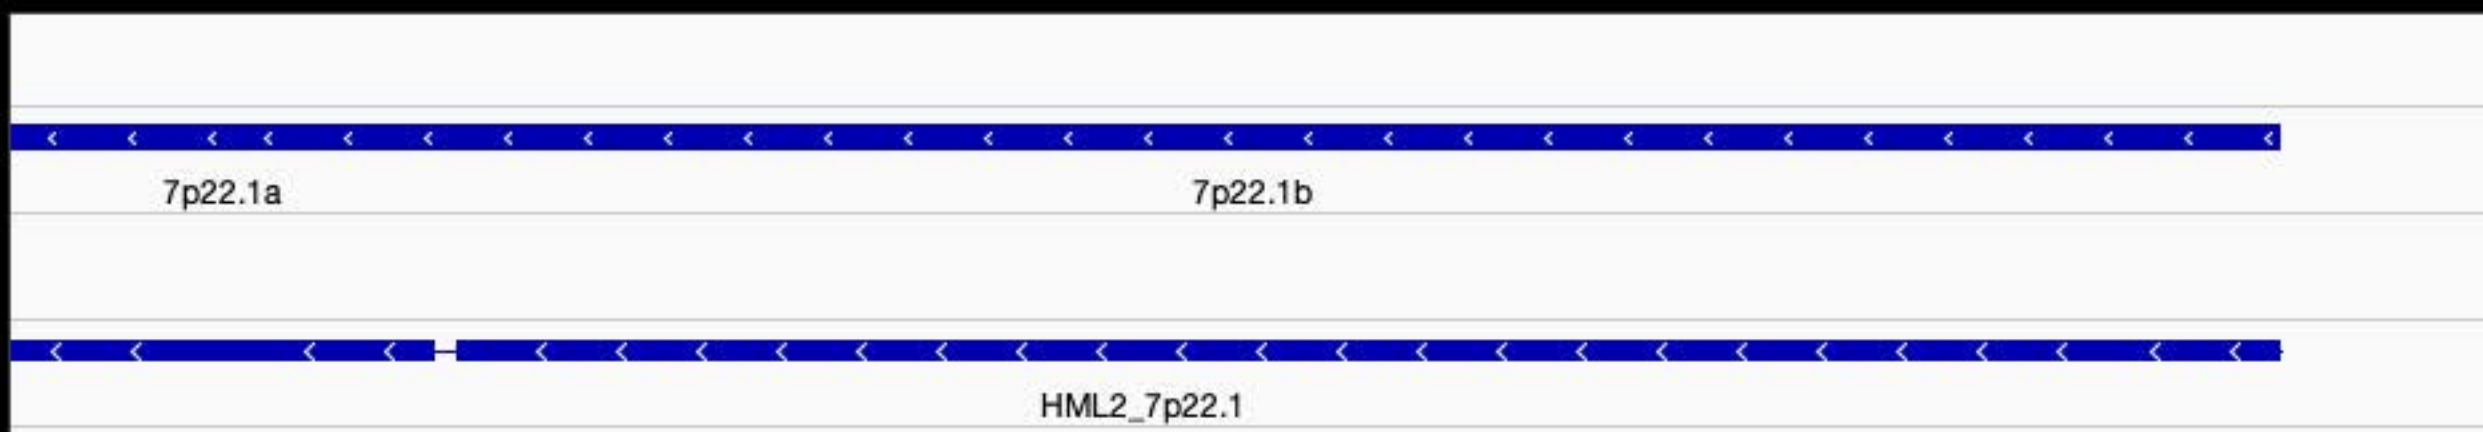

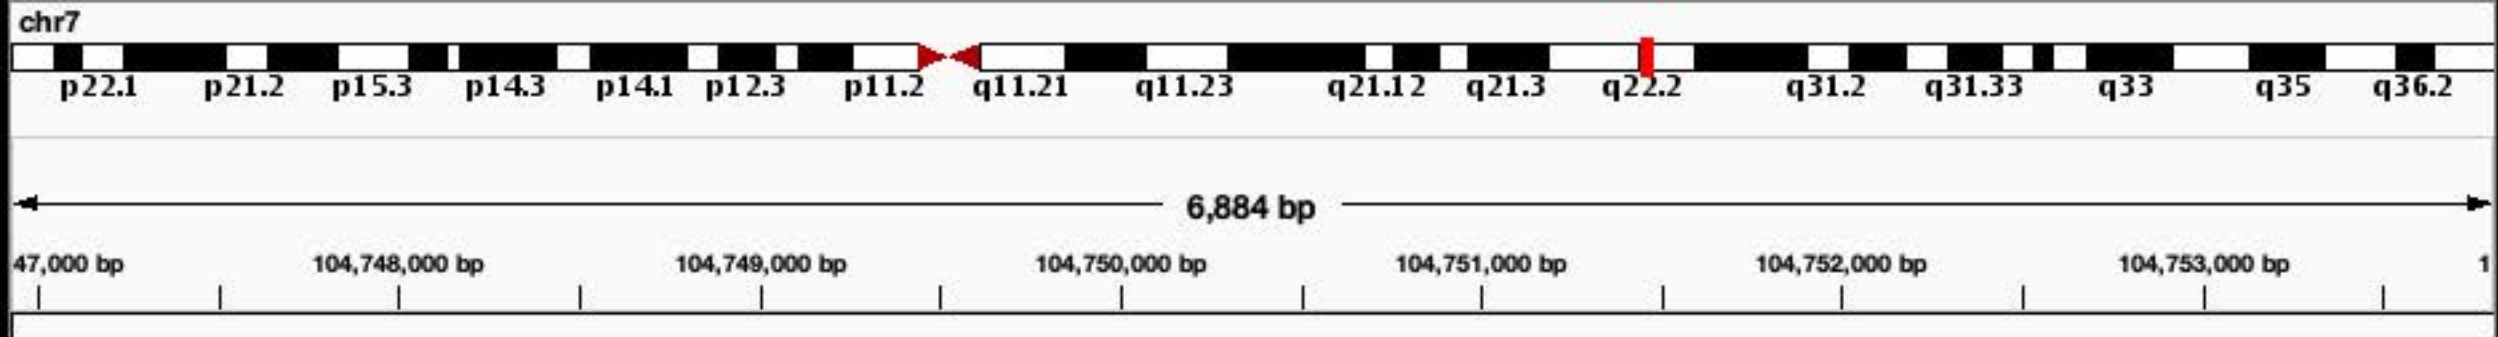

Gene

hg38.subramanianT1.gtf

hg38.subramanianT2.gtf

transcripts.gtf

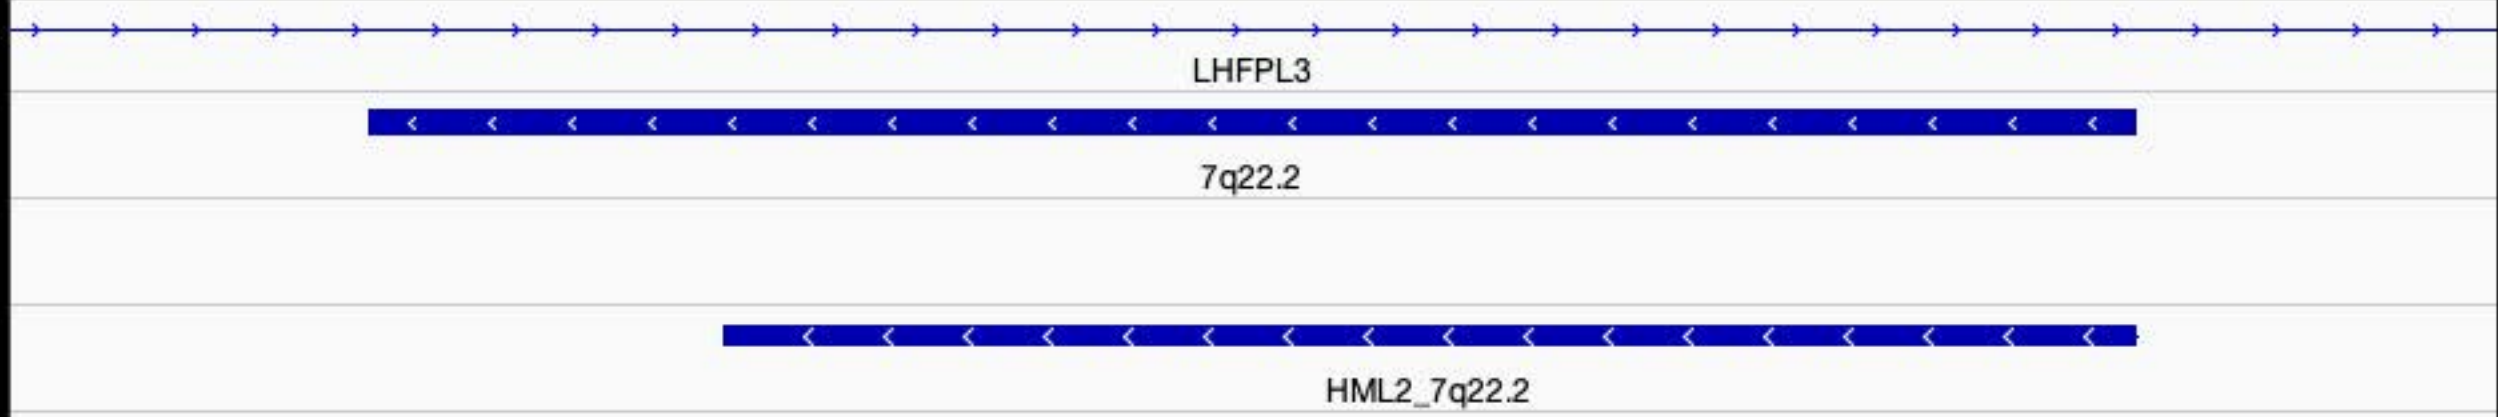

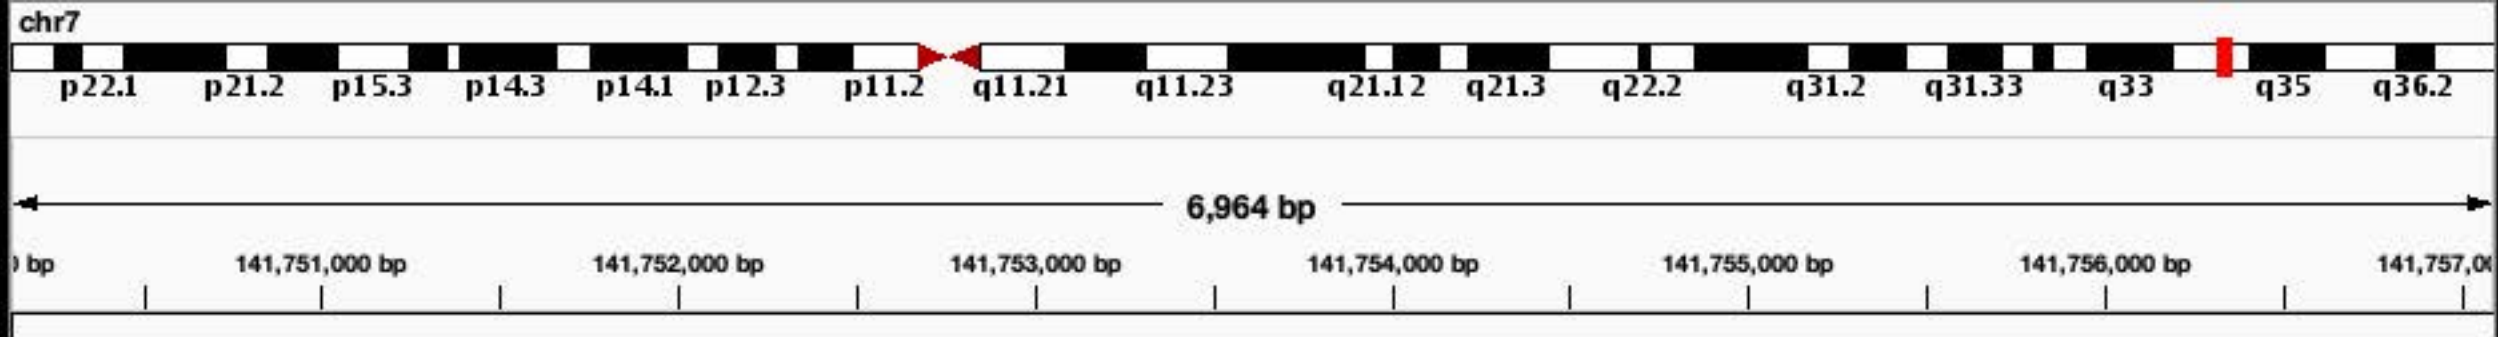

- Gene
- hg38.subramanianT1.gtf
- hg38.subramanianT2.gtf
- transcripts.gtf

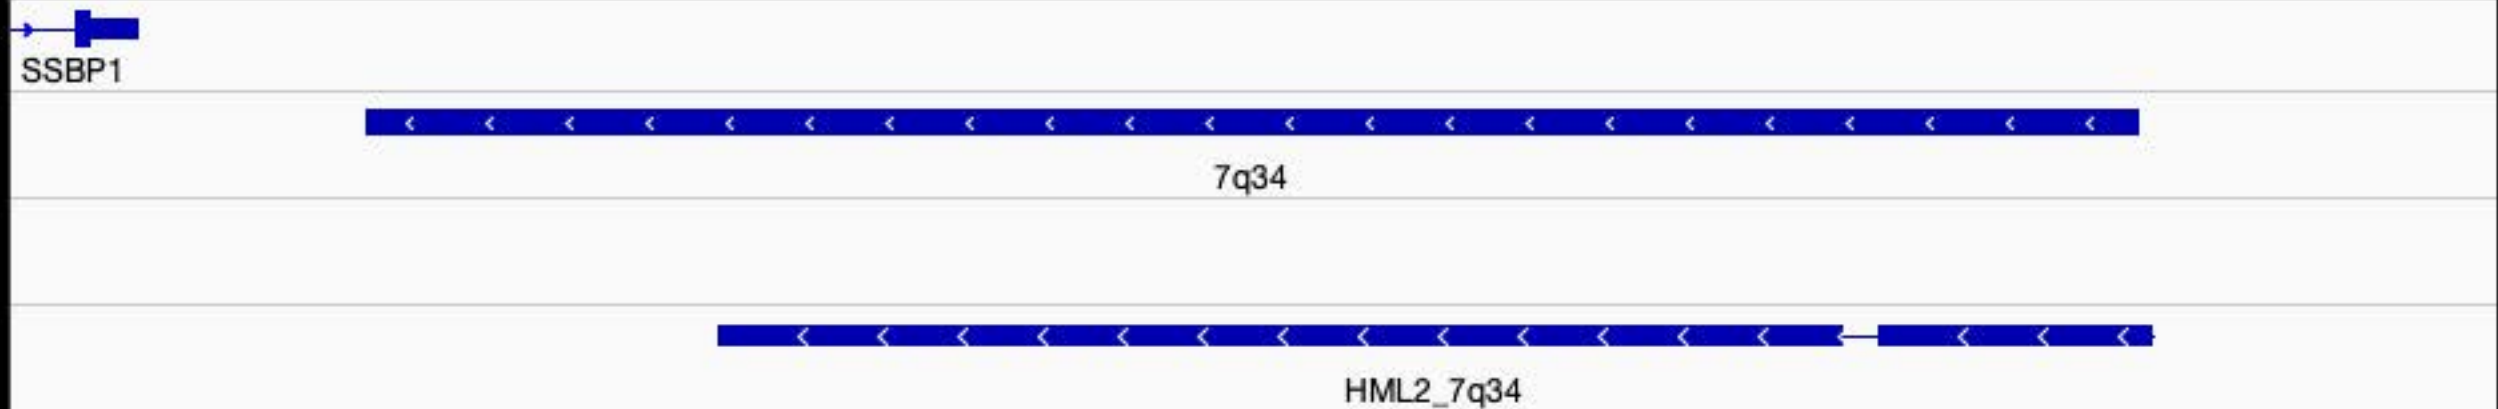



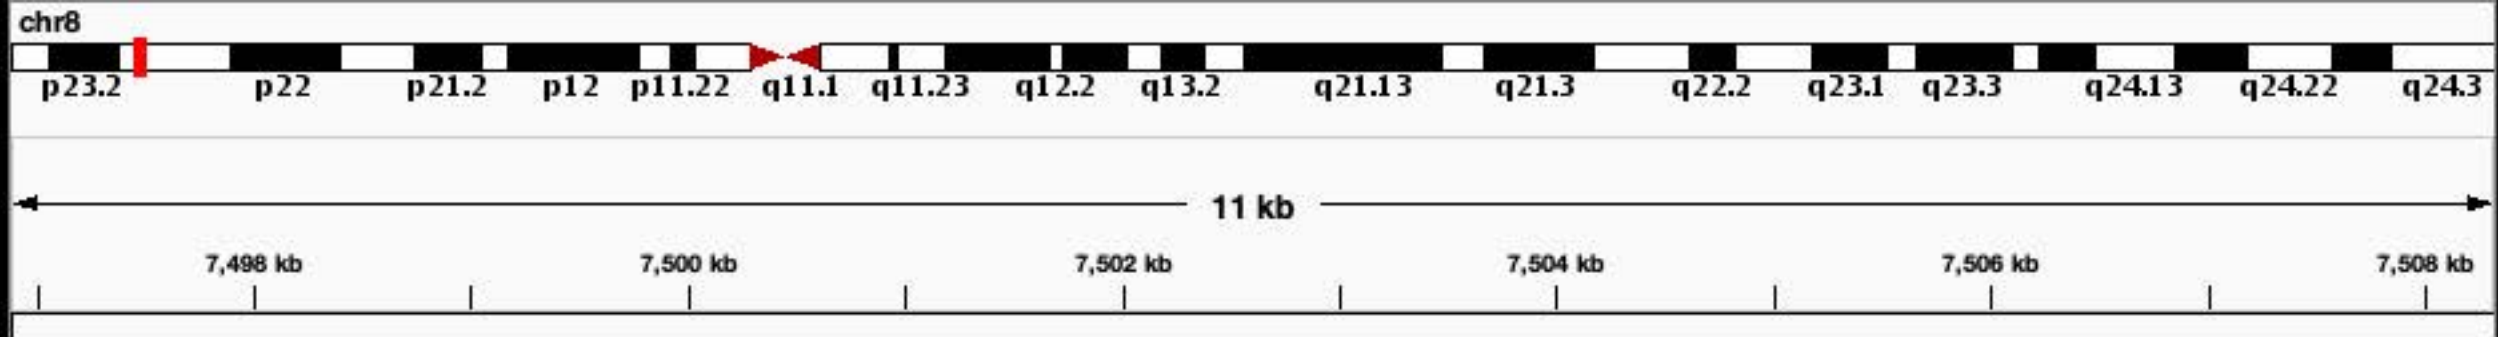

Gene

hg38.subramanianT1.gtf

hg38.subramanianT2.gtf

transcripts.gtf

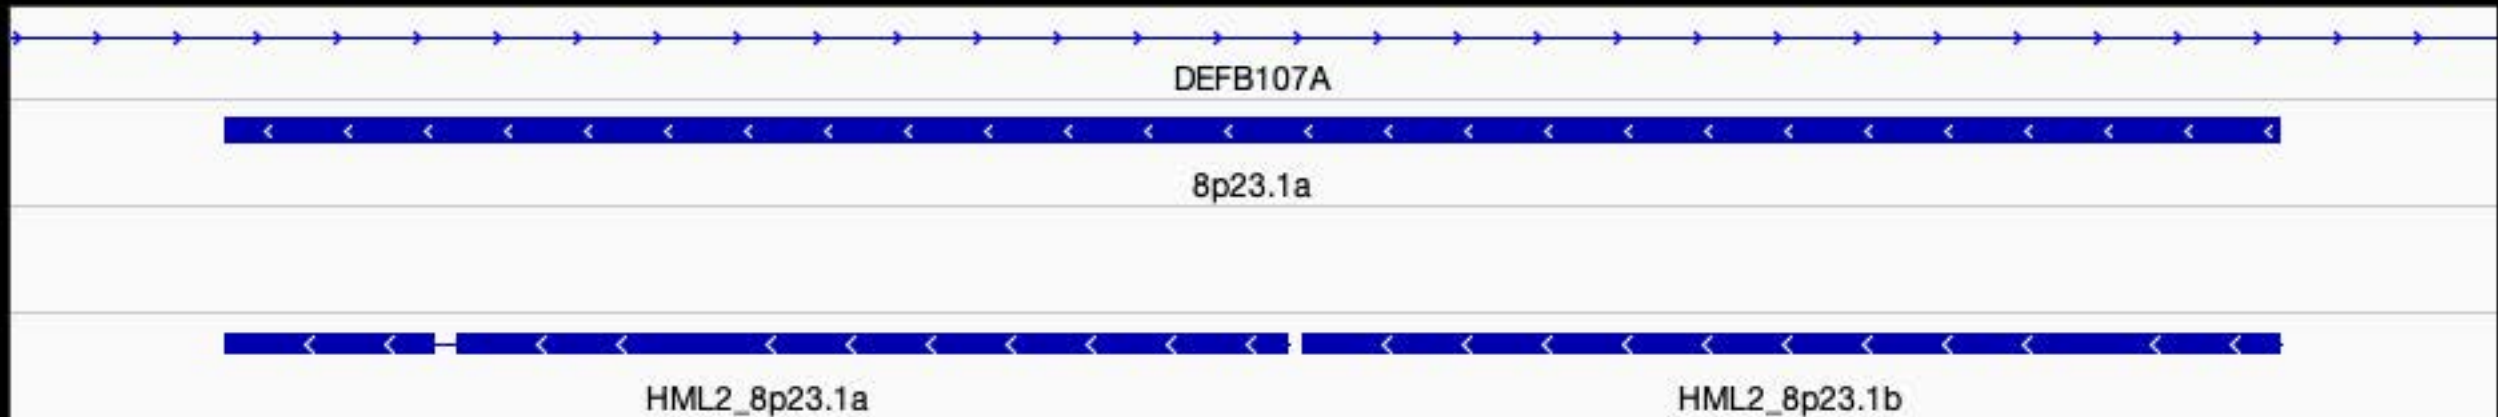

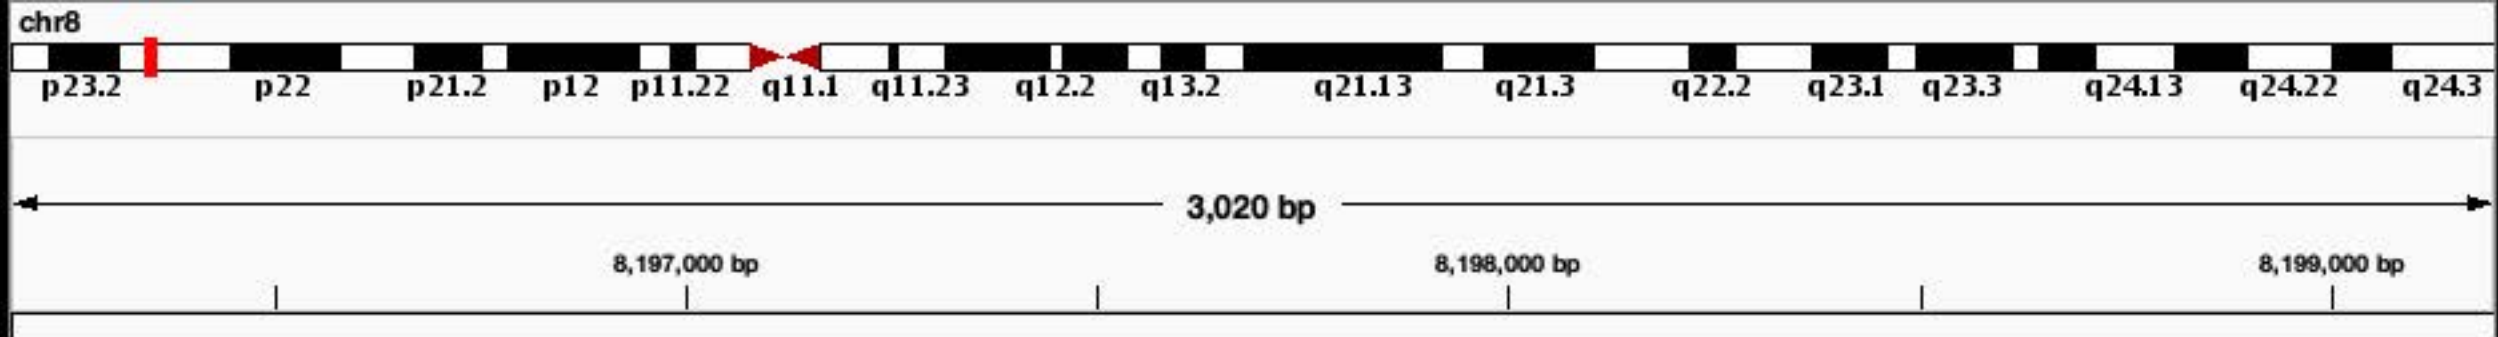

Gene

hg38.subramanianT1.gtf

hg38.subramanianT2.gtf

transcripts.gtf

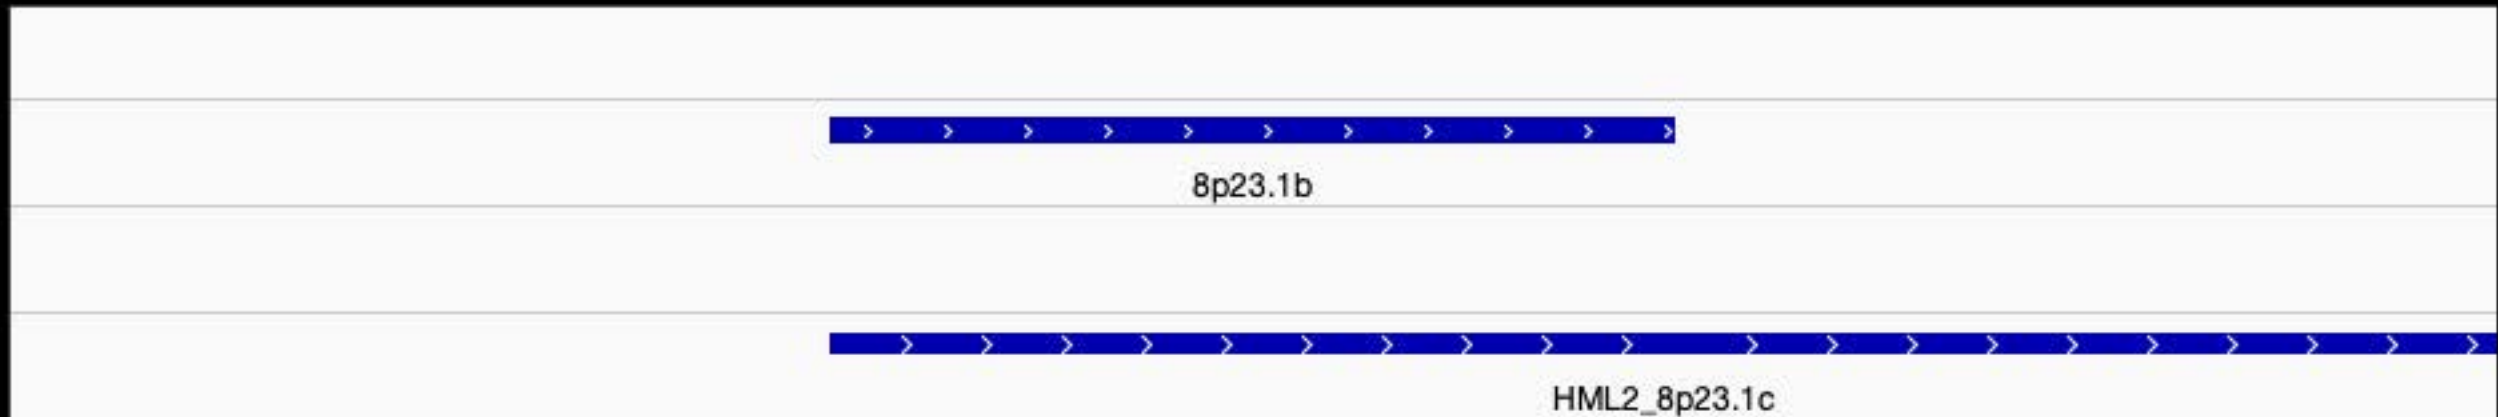

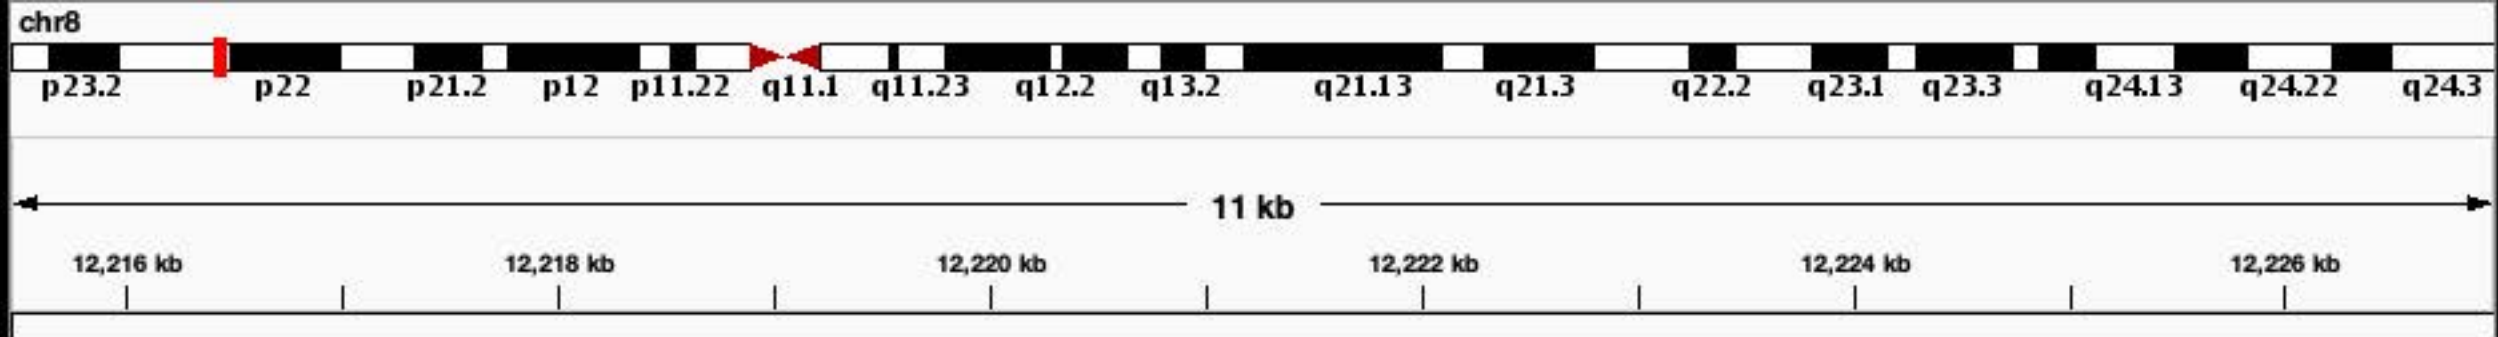

Gene

hg38.subramanianT1.gtf

hg38.subramanianT2.gtf

transcripts.gtf

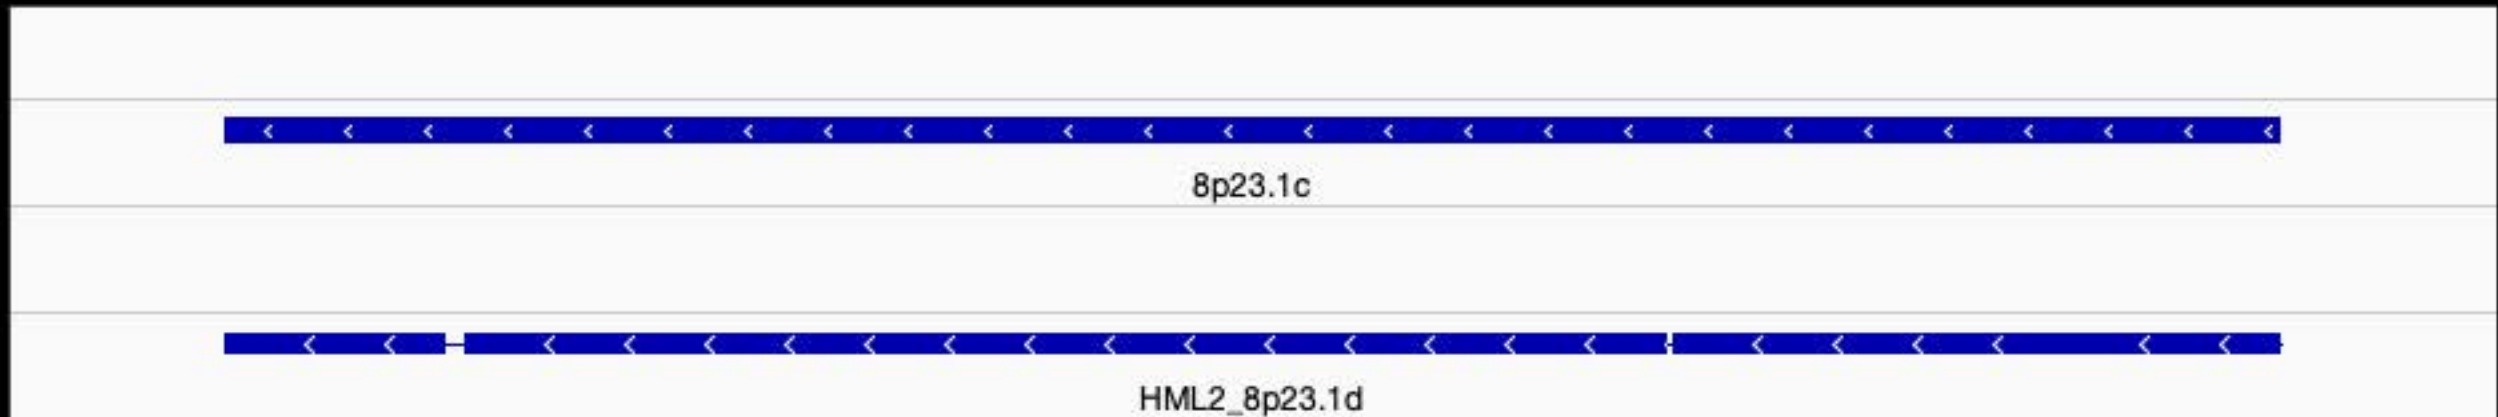

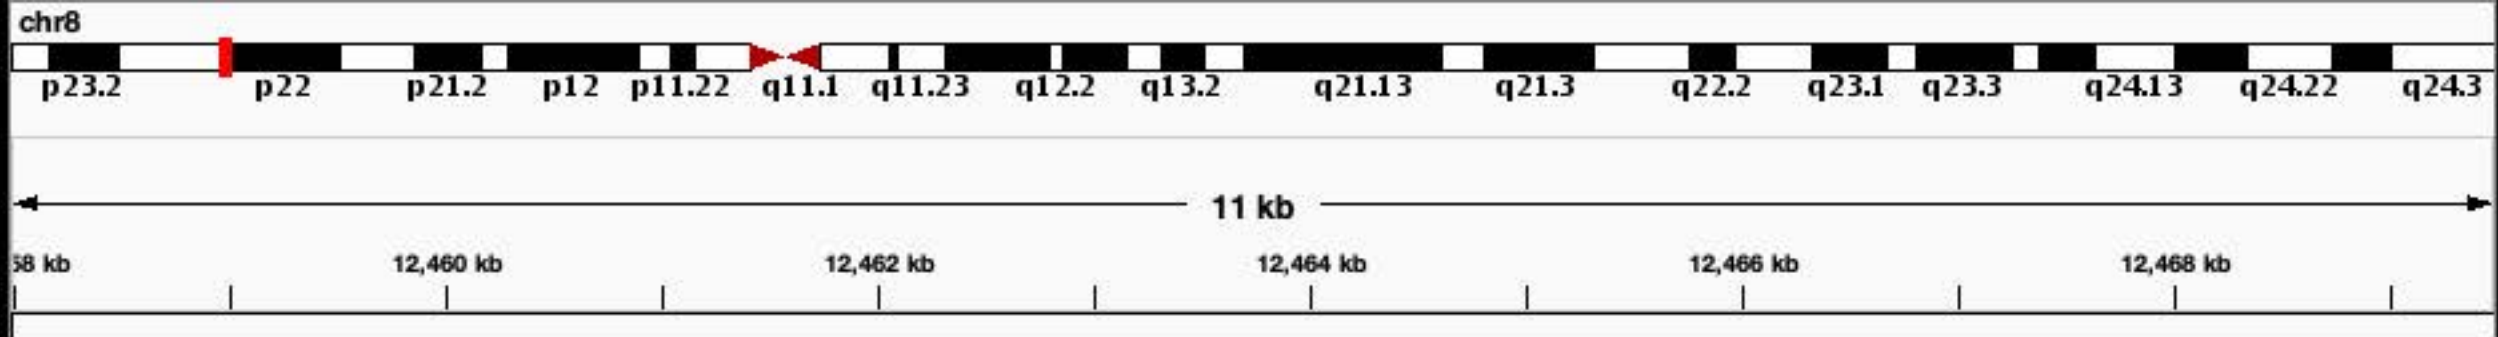

Gene

hg38.subramanianT1.gtf

hg38.subramanianT2.gtf

transcripts.gtf

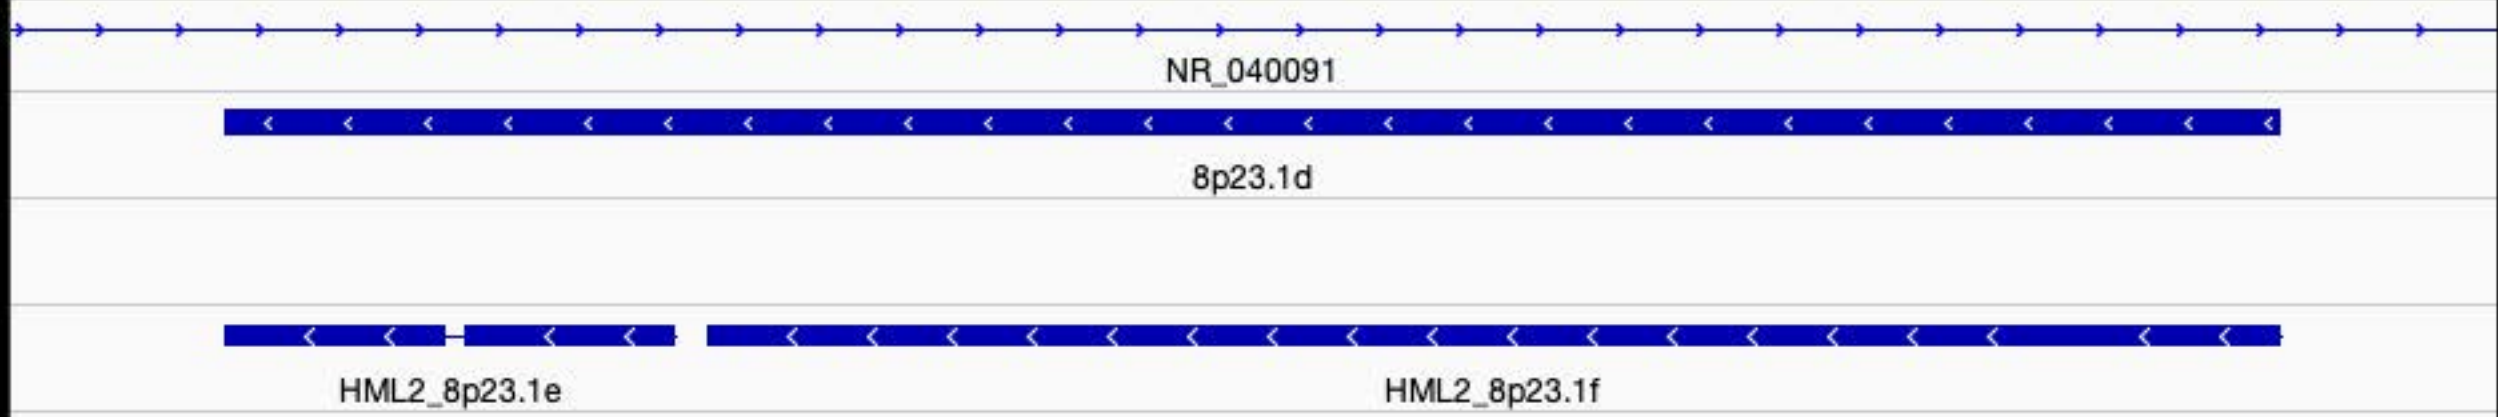

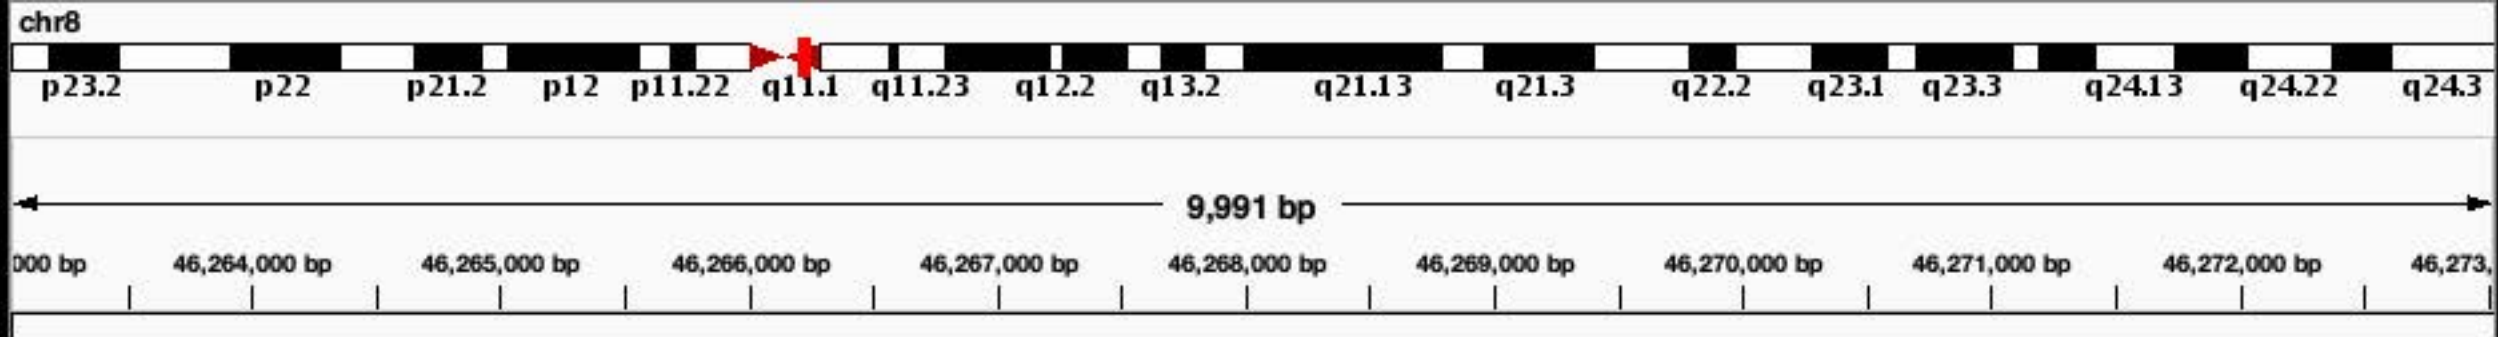

Gene

hg38.subramanianT1.gtf

hg38.subramanianT2.gtf

transcripts.gtf

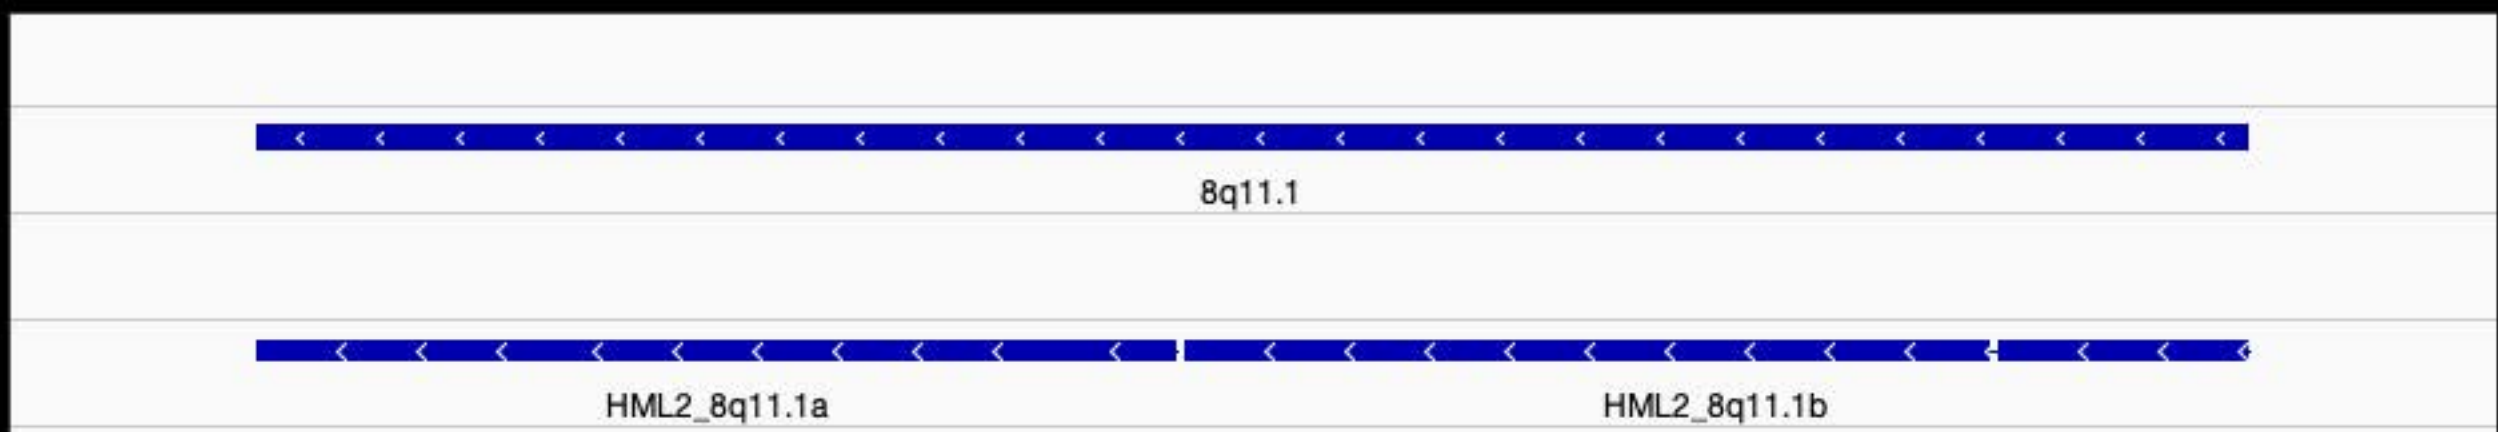

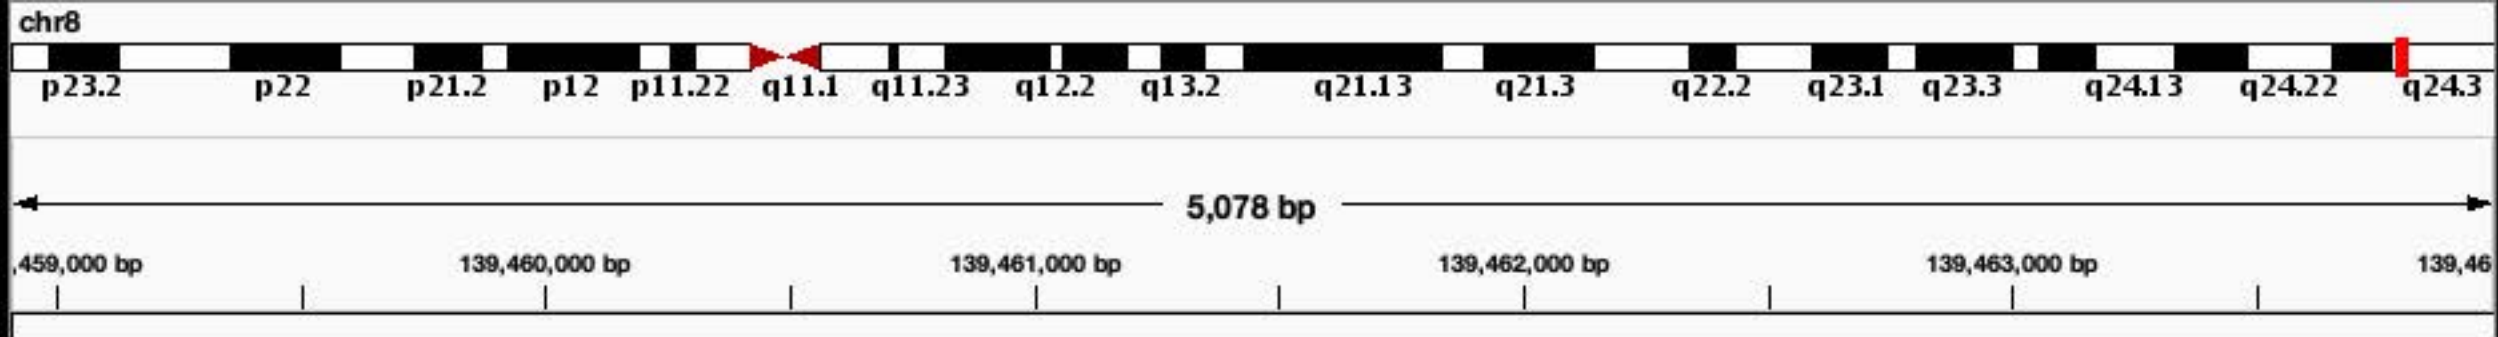

Gene

hg38.subramanianT1.gtf

hg38.subramanianT2.gtf

transcripts.gtf

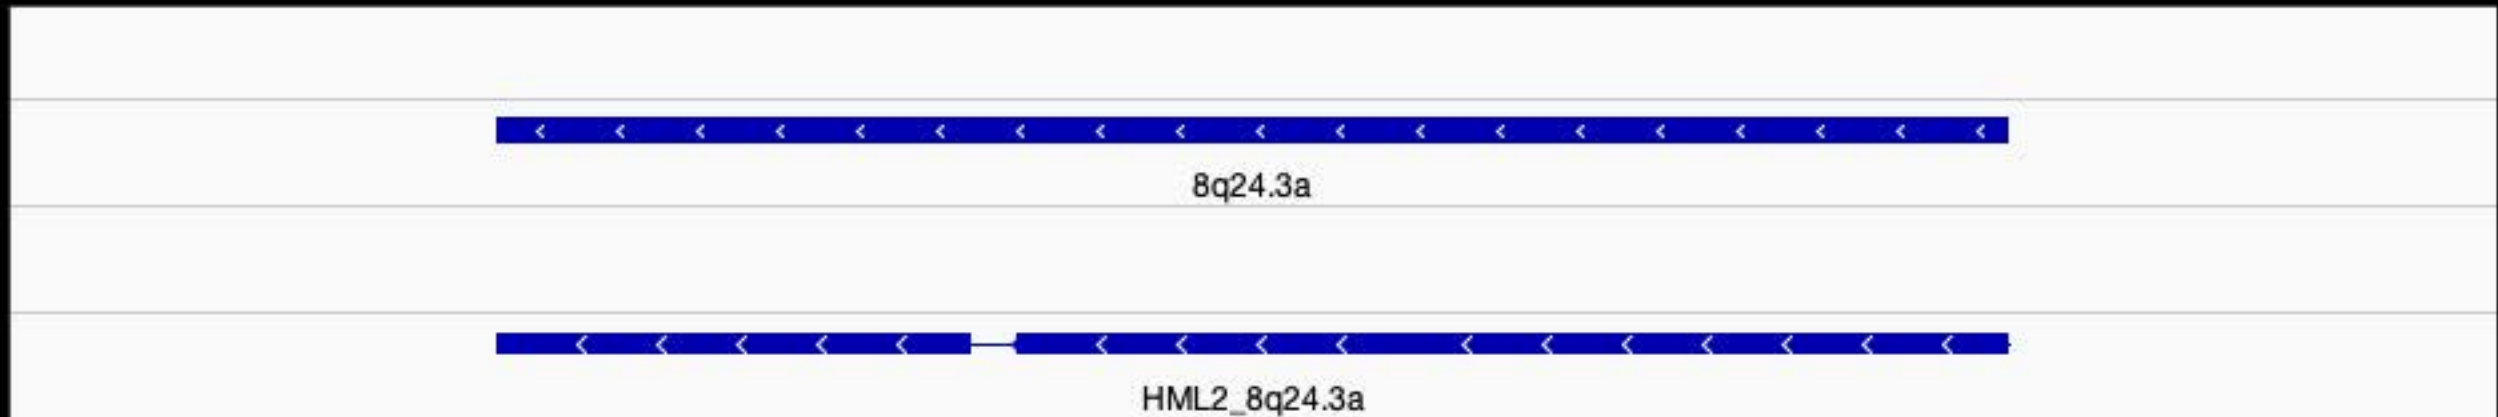

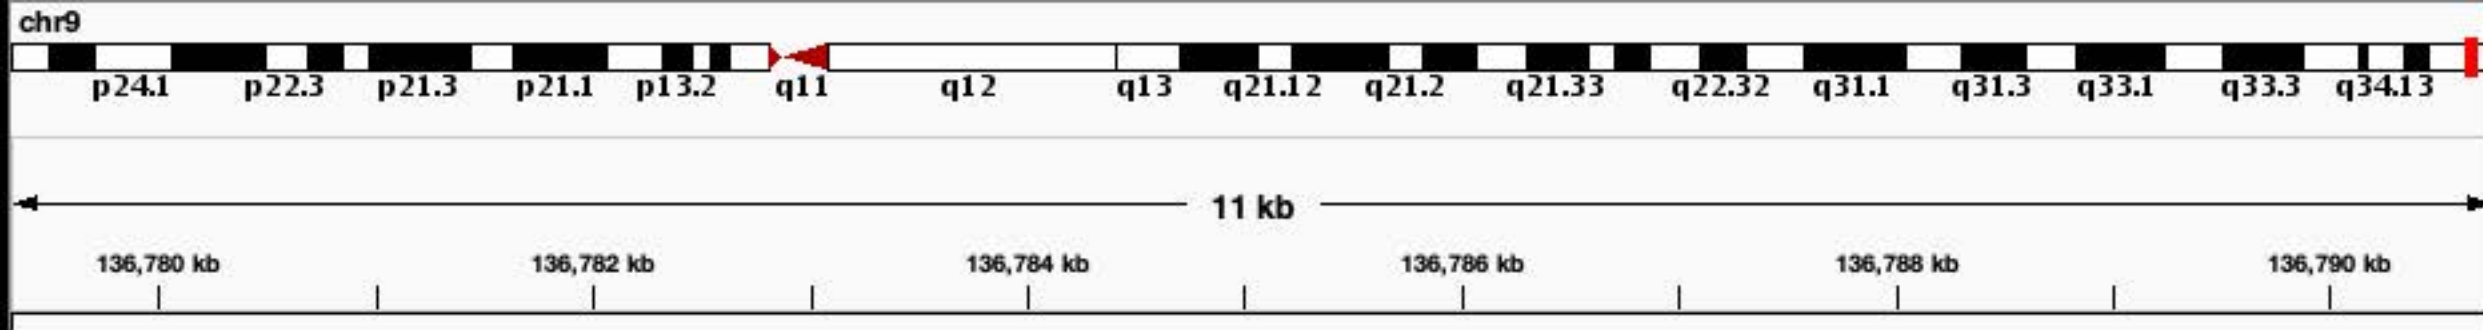

Gene

hg38.subramanianT1.gtf

hg38.subramanianT2.gtf

transcripts.gtf

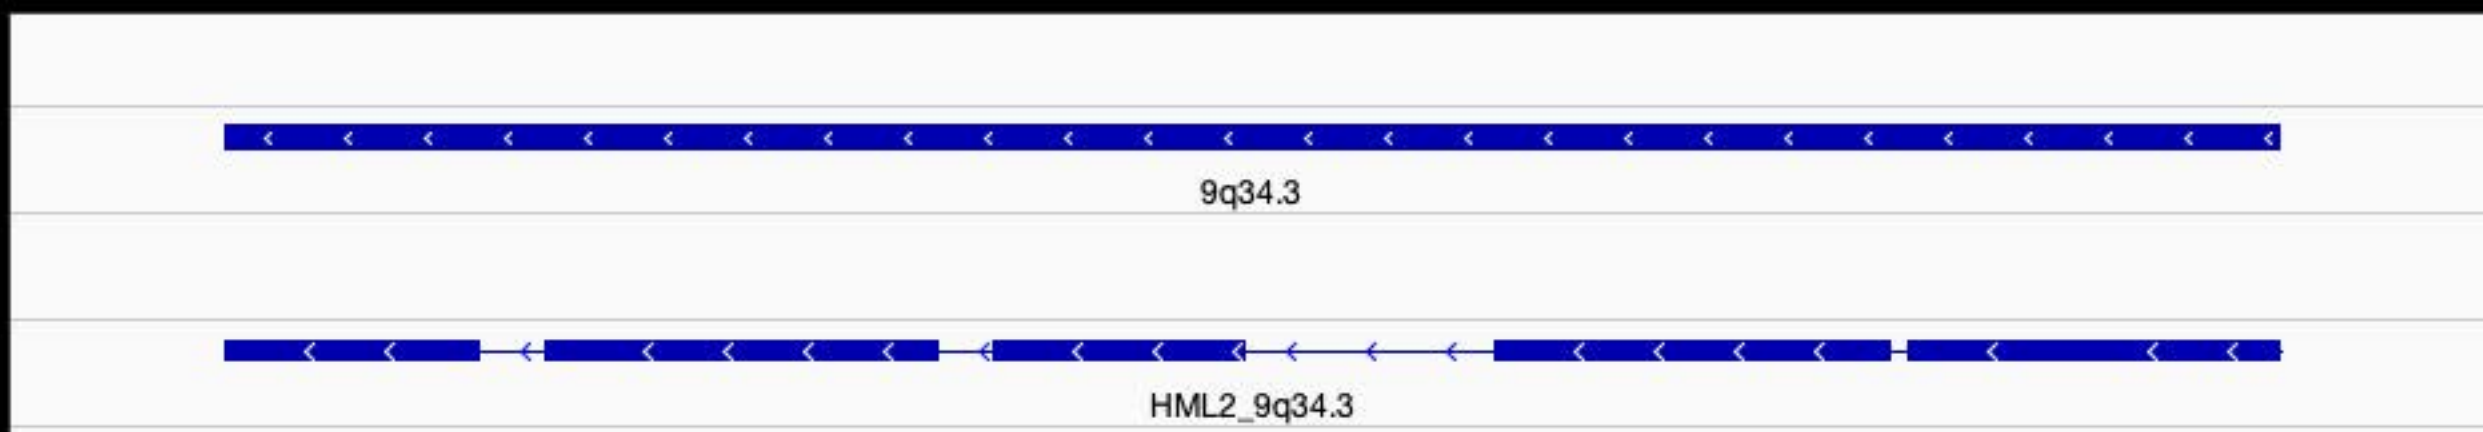

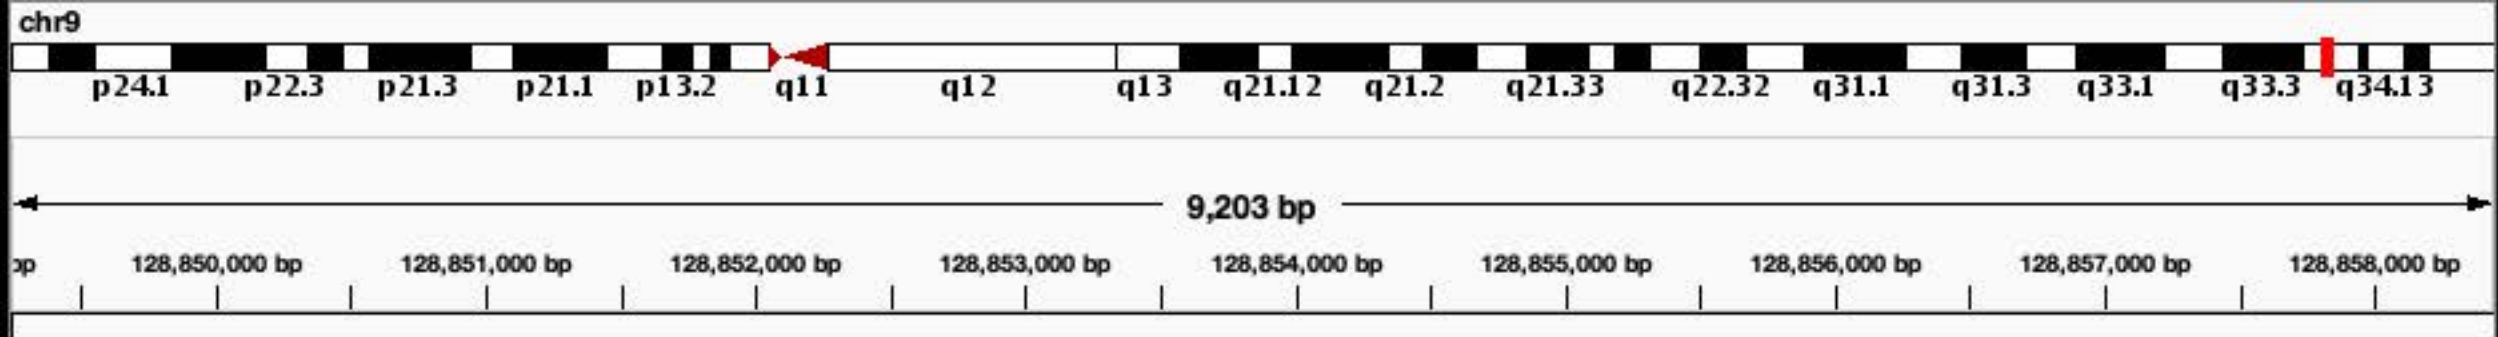

- Gene
- hg38.subramanianT1.gtf
- hg38.subramanianT2.gtf
- transcripts.gtf

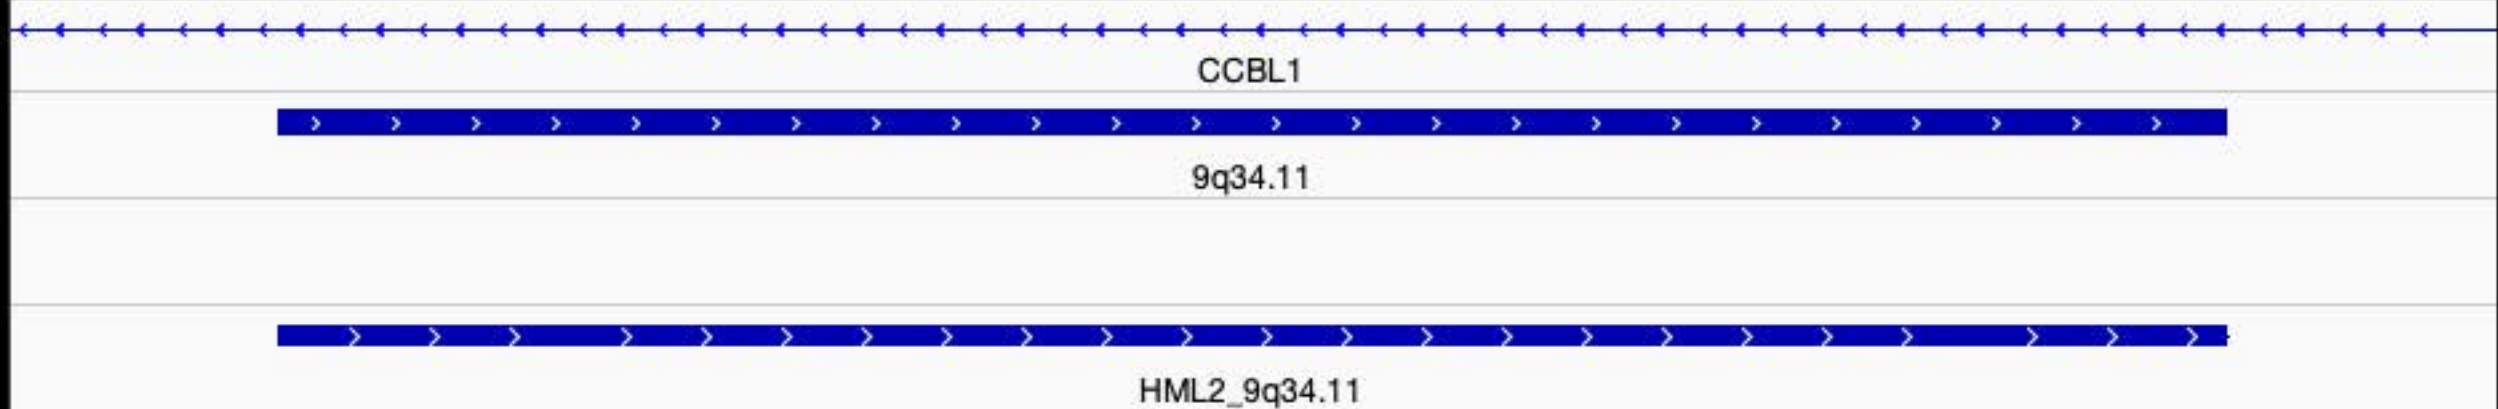



chr10

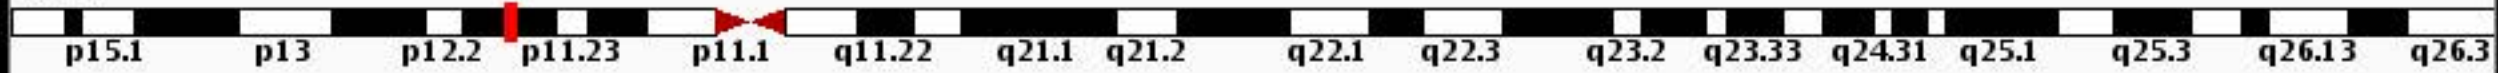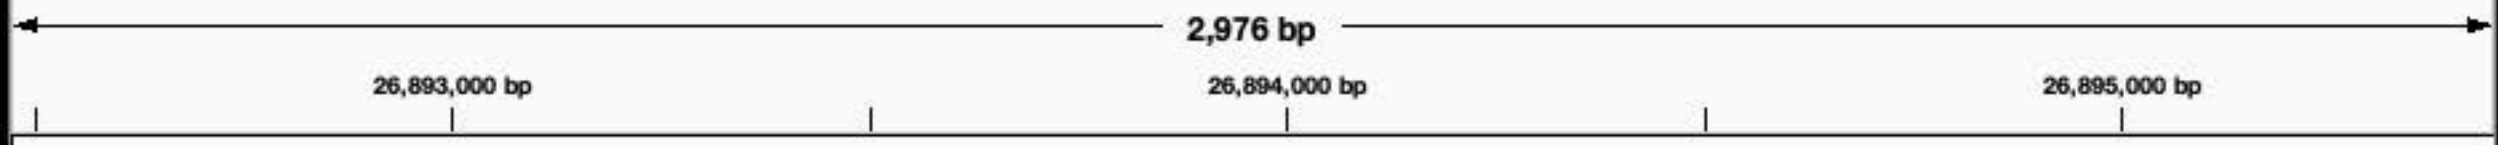

- Gene
- hg38.subramanianT1.gtf
- hg38.subramanianT2.gtf
- transcripts.gtf

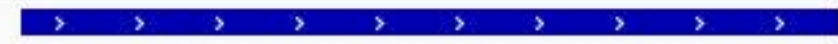

10p12.1

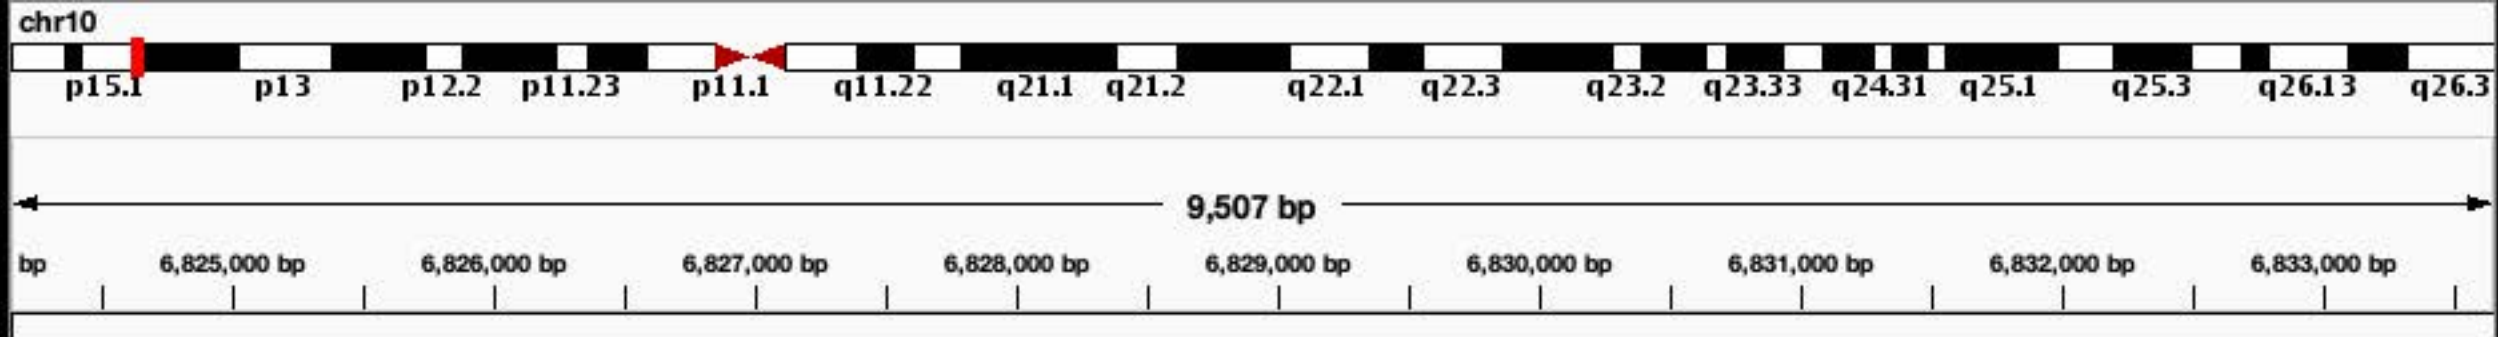

Gene

hg38.subramanianT1.gtf

hg38.subramanianT2.gtf

transcripts.gtf

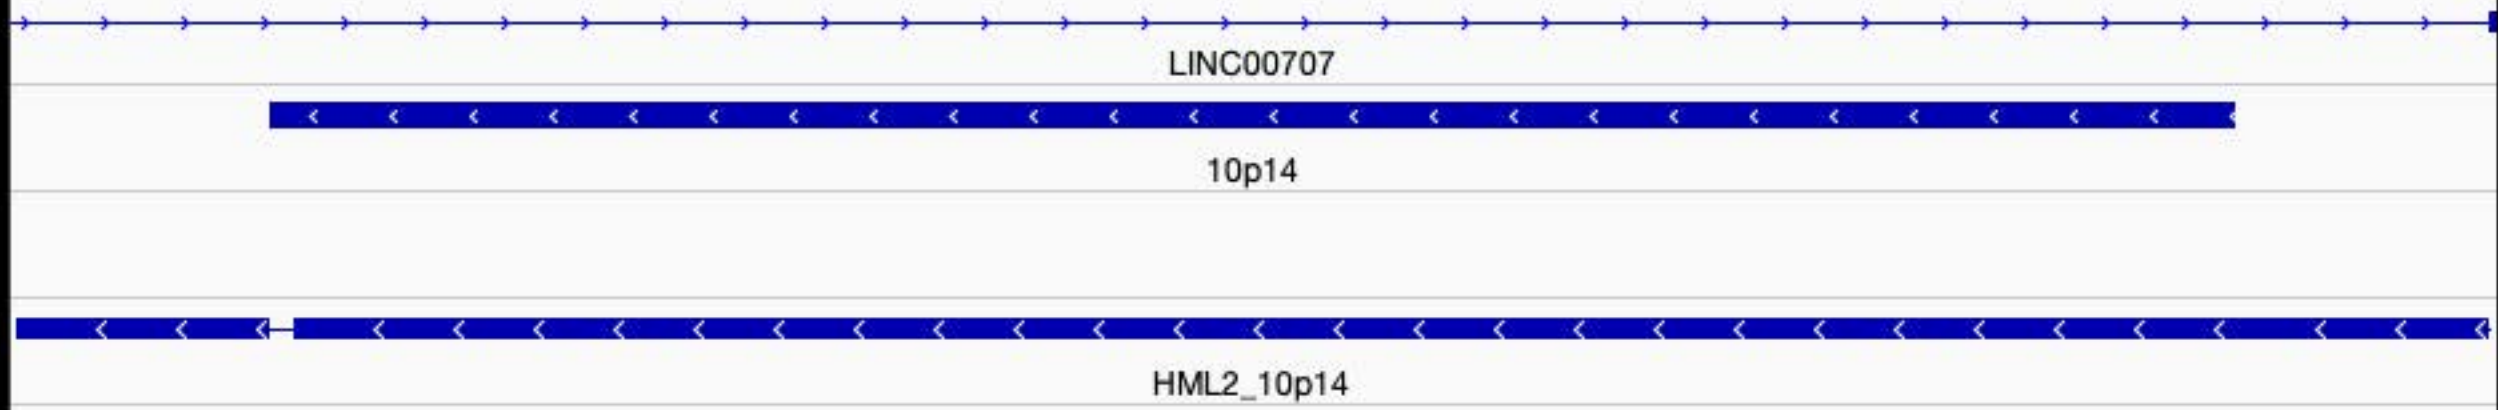

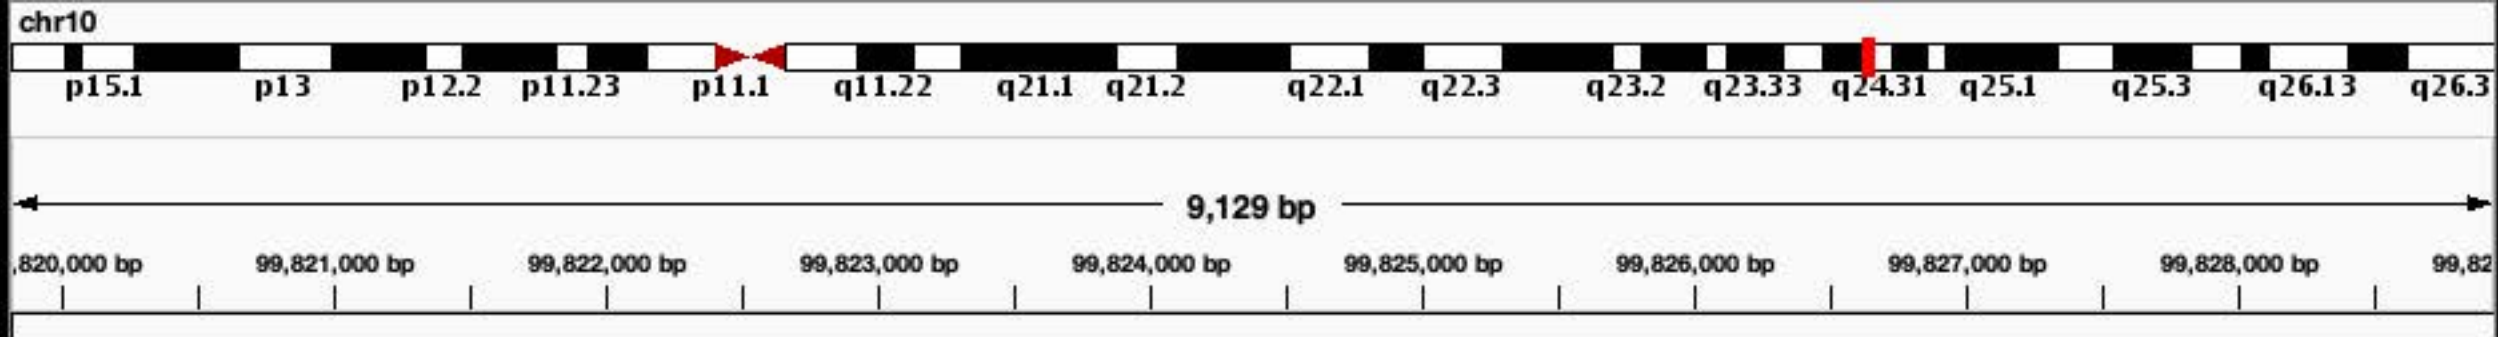

Gene

hg38.subramanianT1.gtf

hg38.subramanianT2.gtf

transcripts.gtf

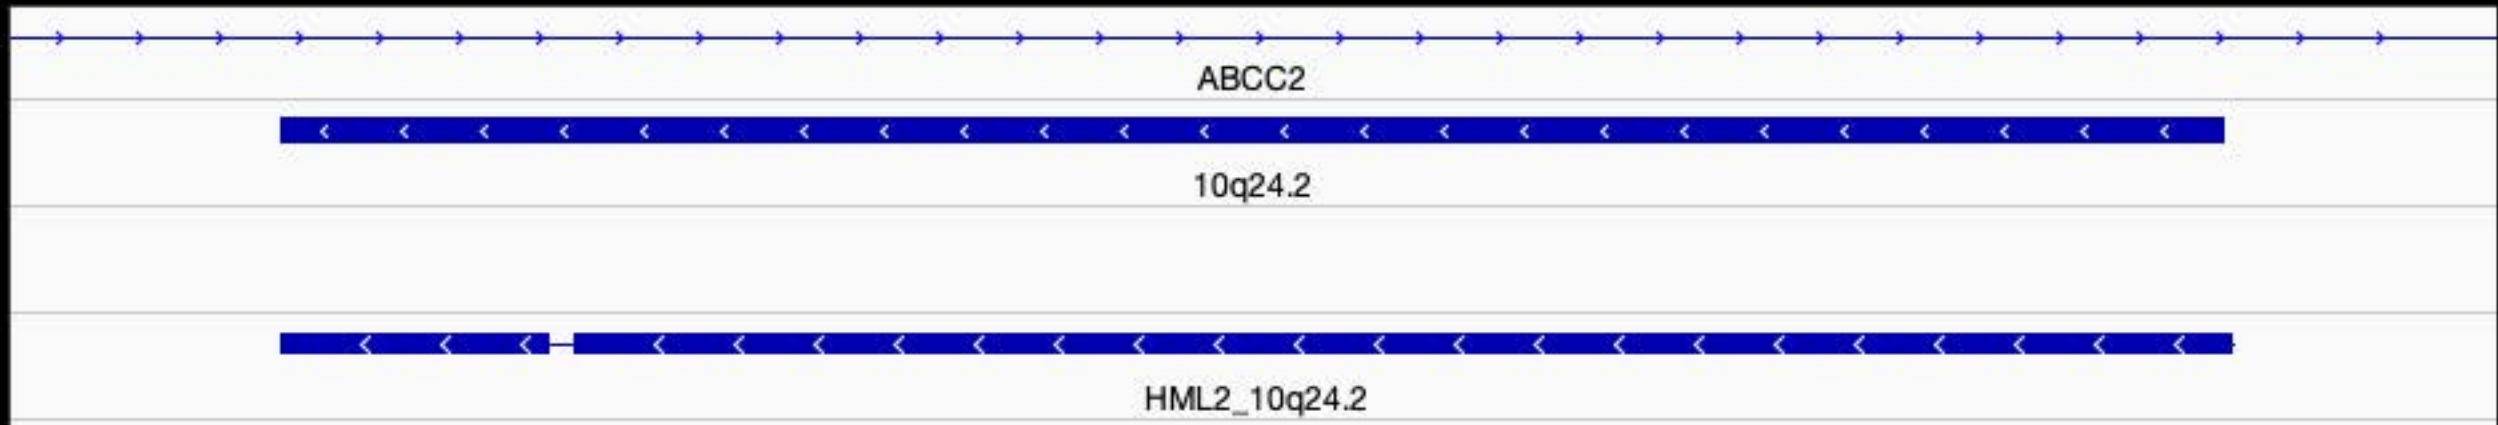

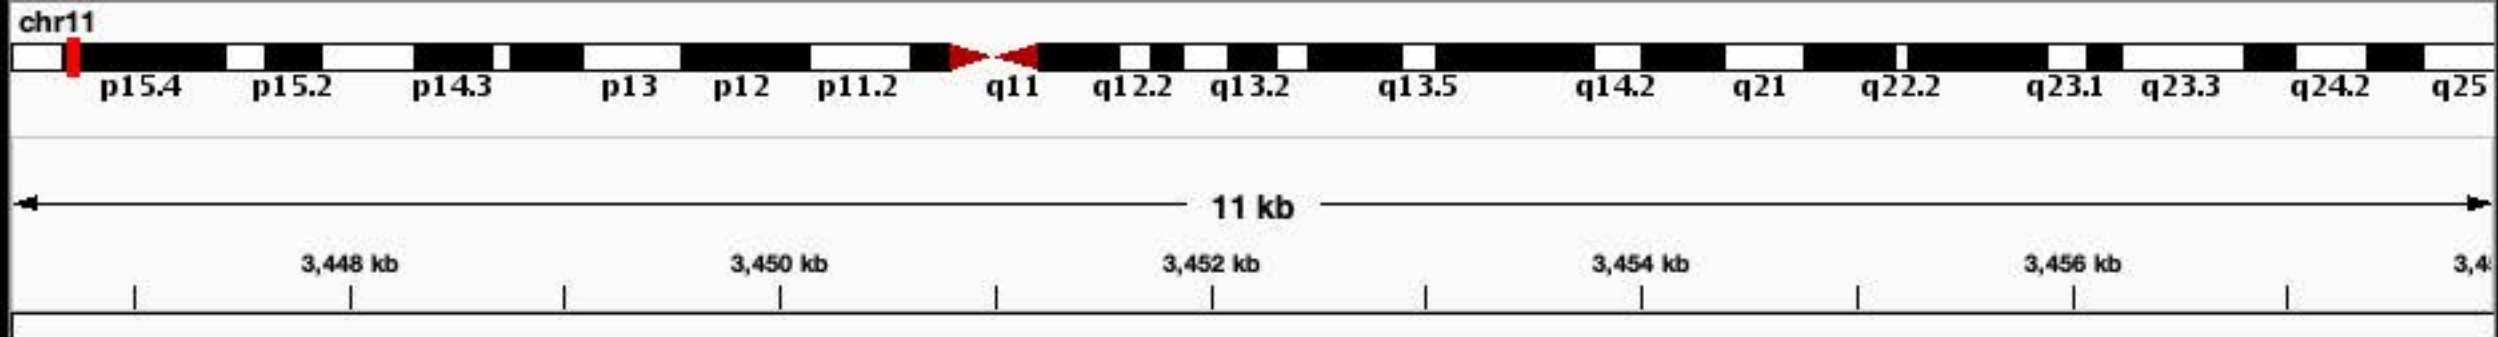

Gene

hg38.subramanianT1.gtf

hg38.subramanianT2.gtf

transcripts.gtf

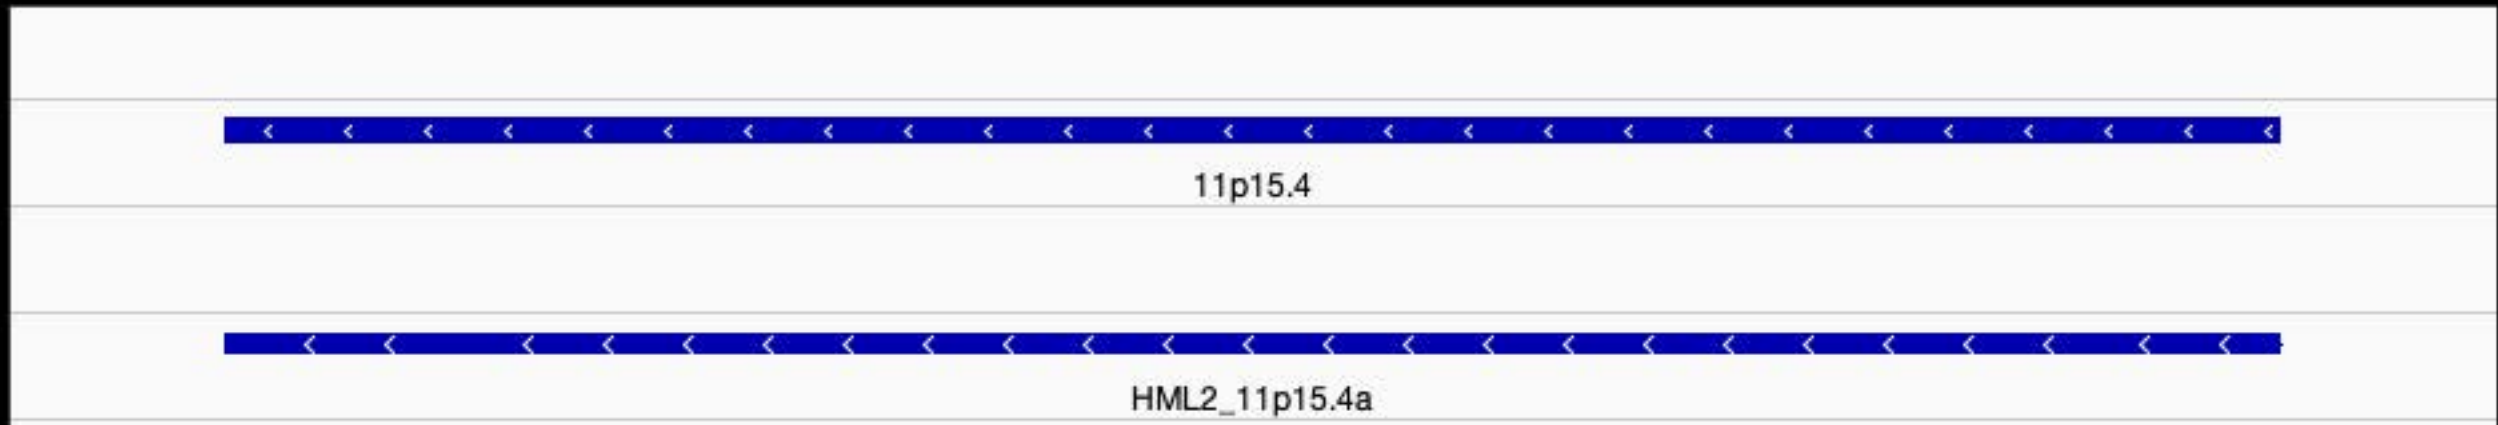

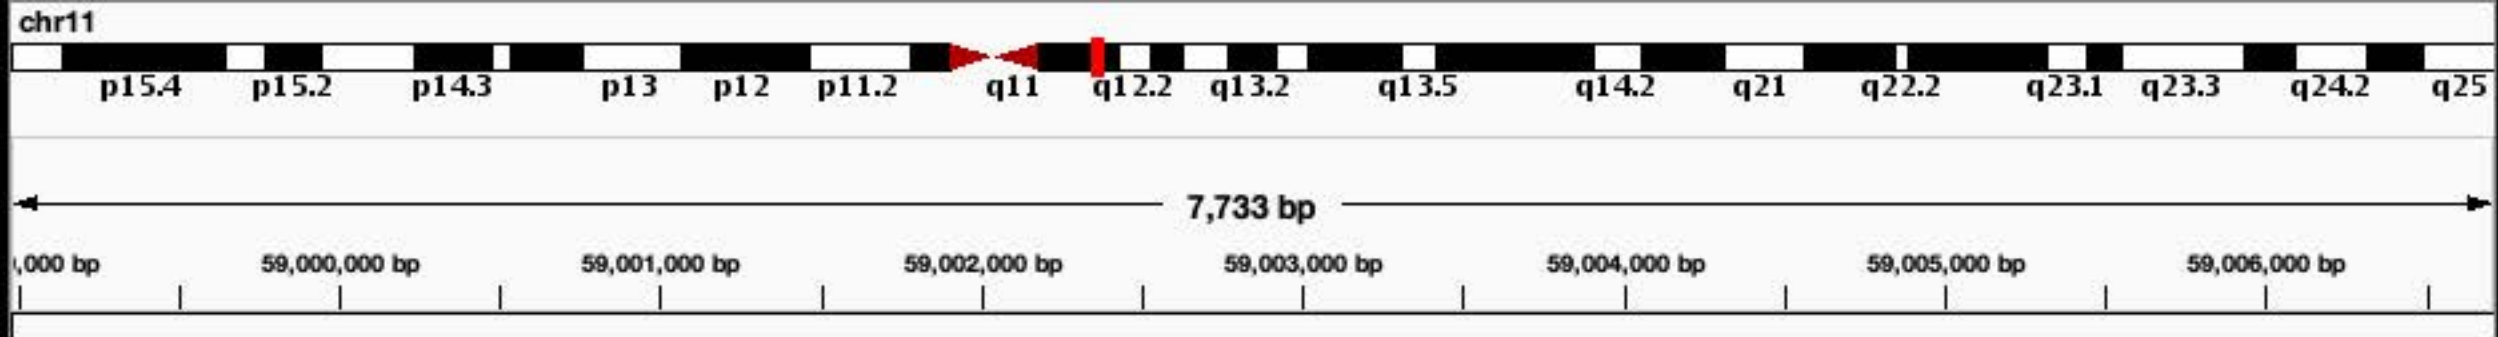

Gene

hg38.subramanianT1.gtf

hg38.subramanianT2.gtf

transcripts.gtf

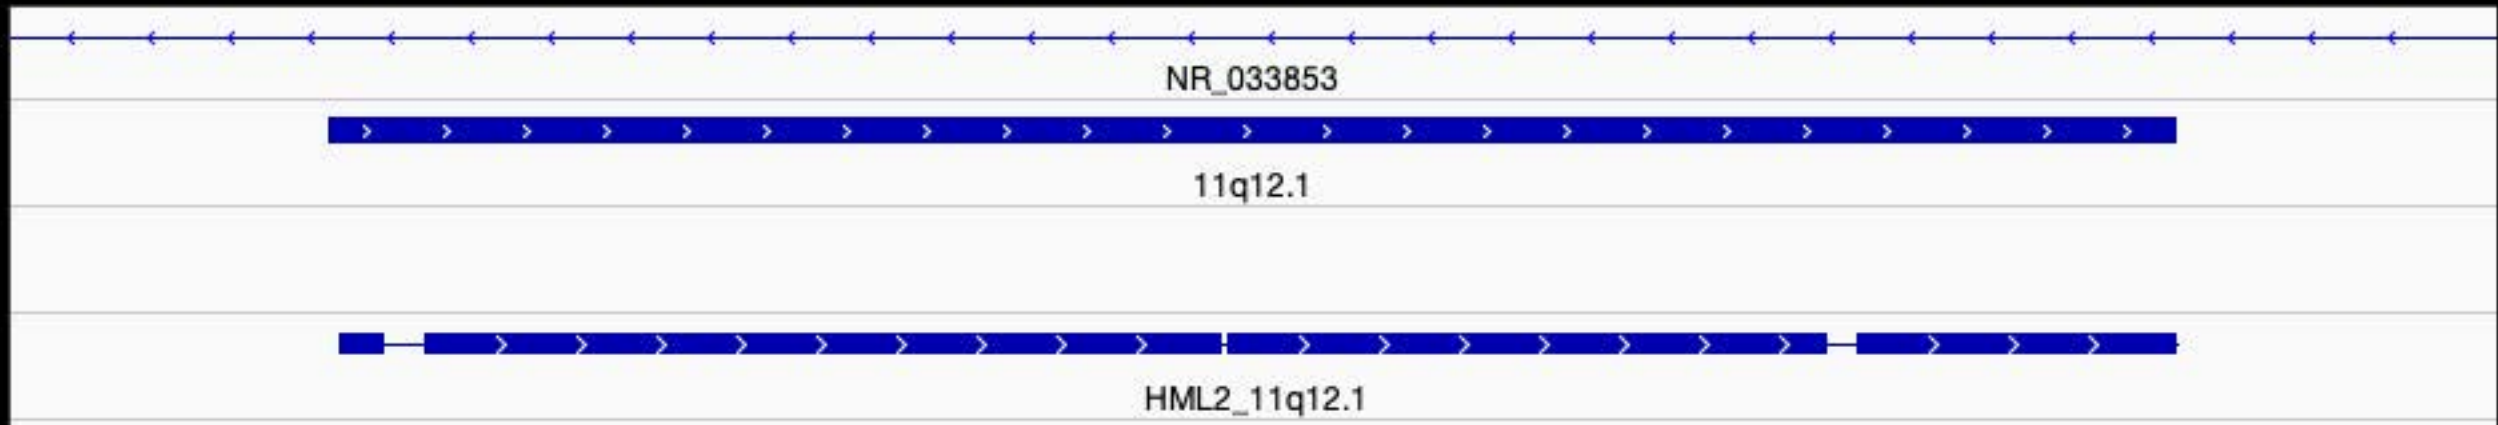

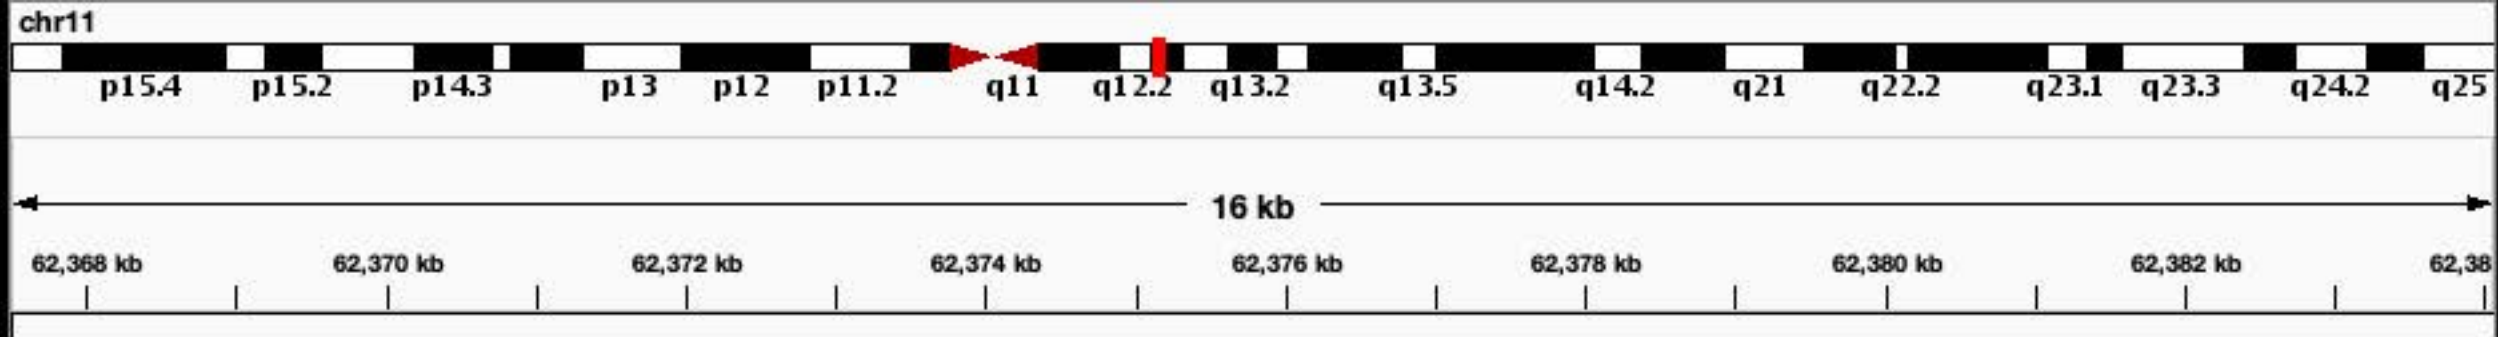

Gene

hg38.subramanianT1.gtf

hg38.subramanianT2.gtf

transcripts.gtf

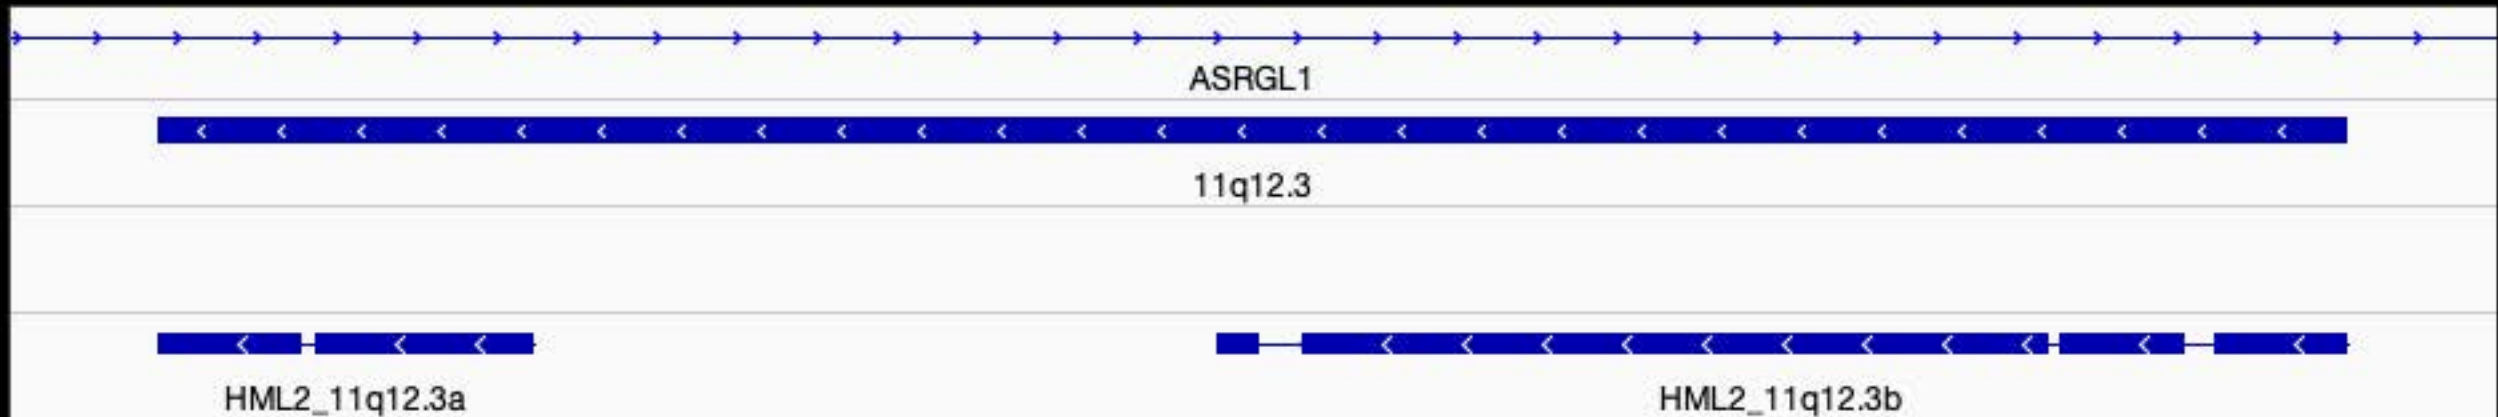

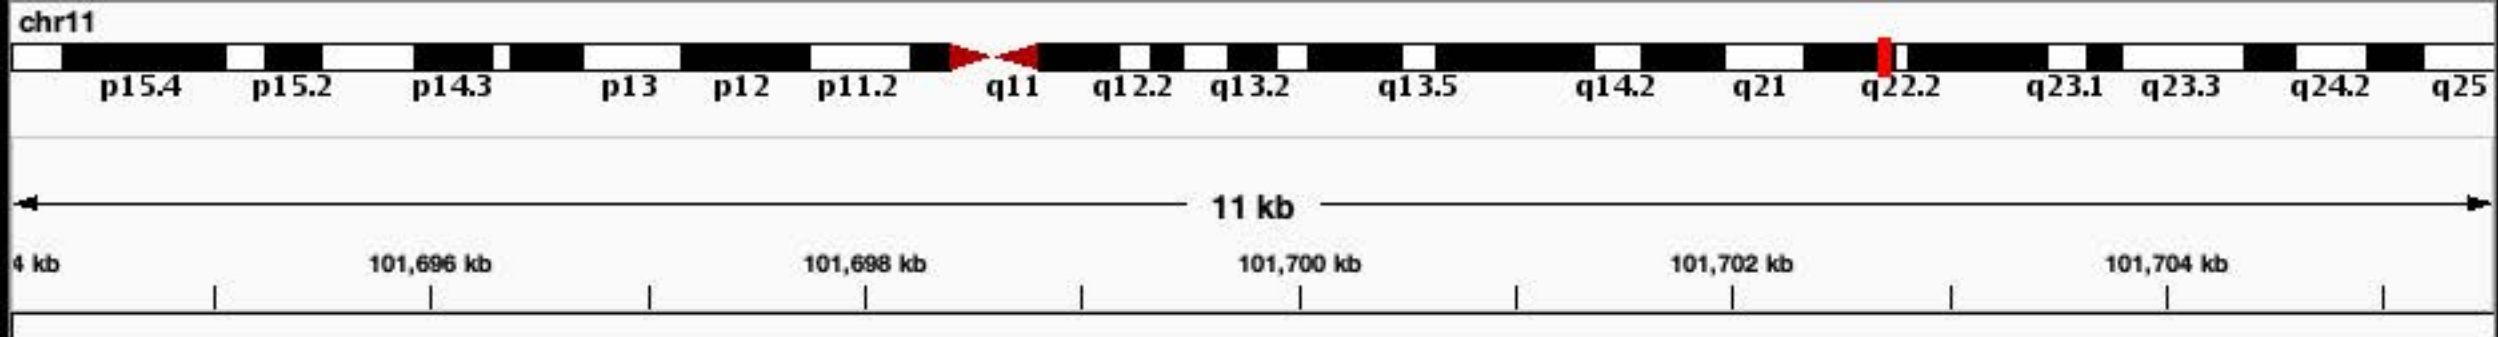

Gene

hg38.subramanianT1.gtf

hg38.subramanianT2.gtf

transcripts.gtf

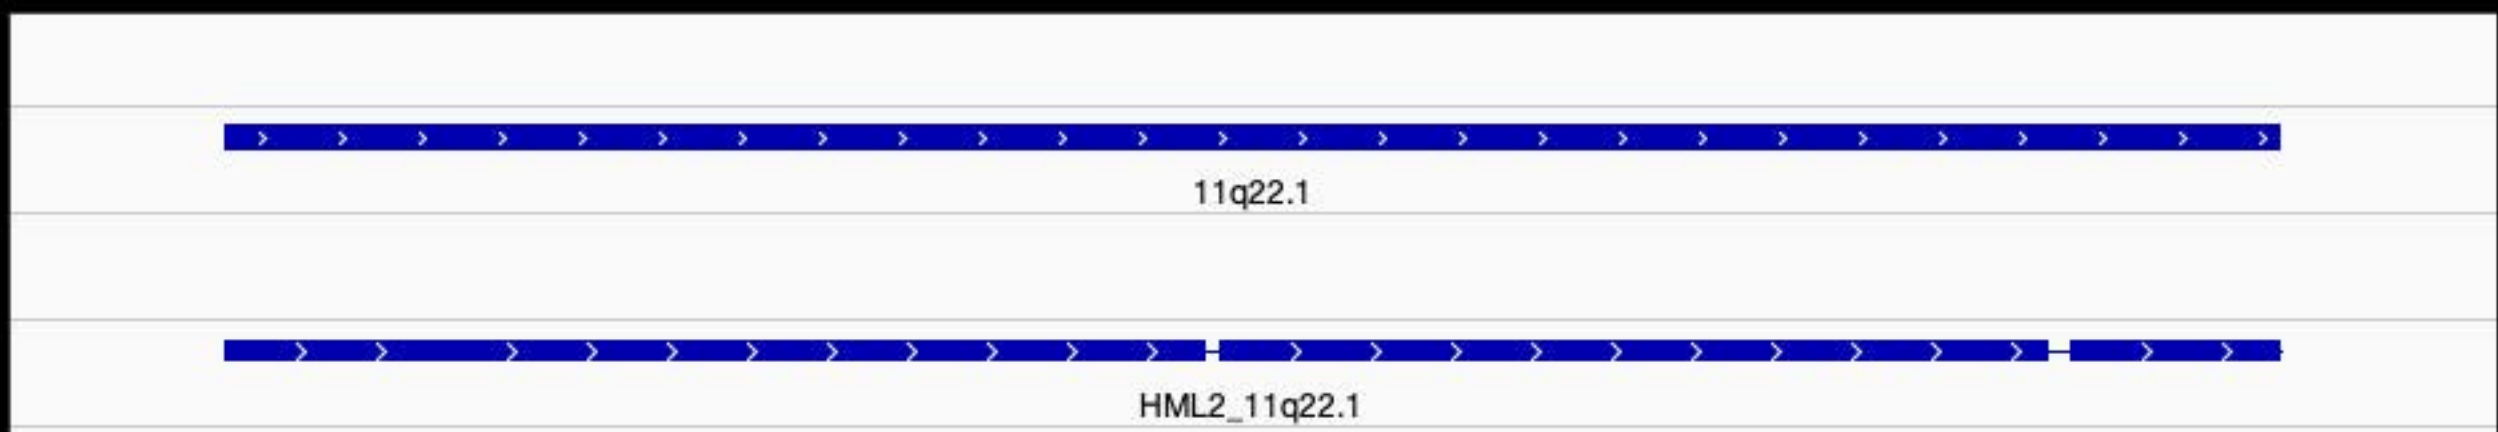

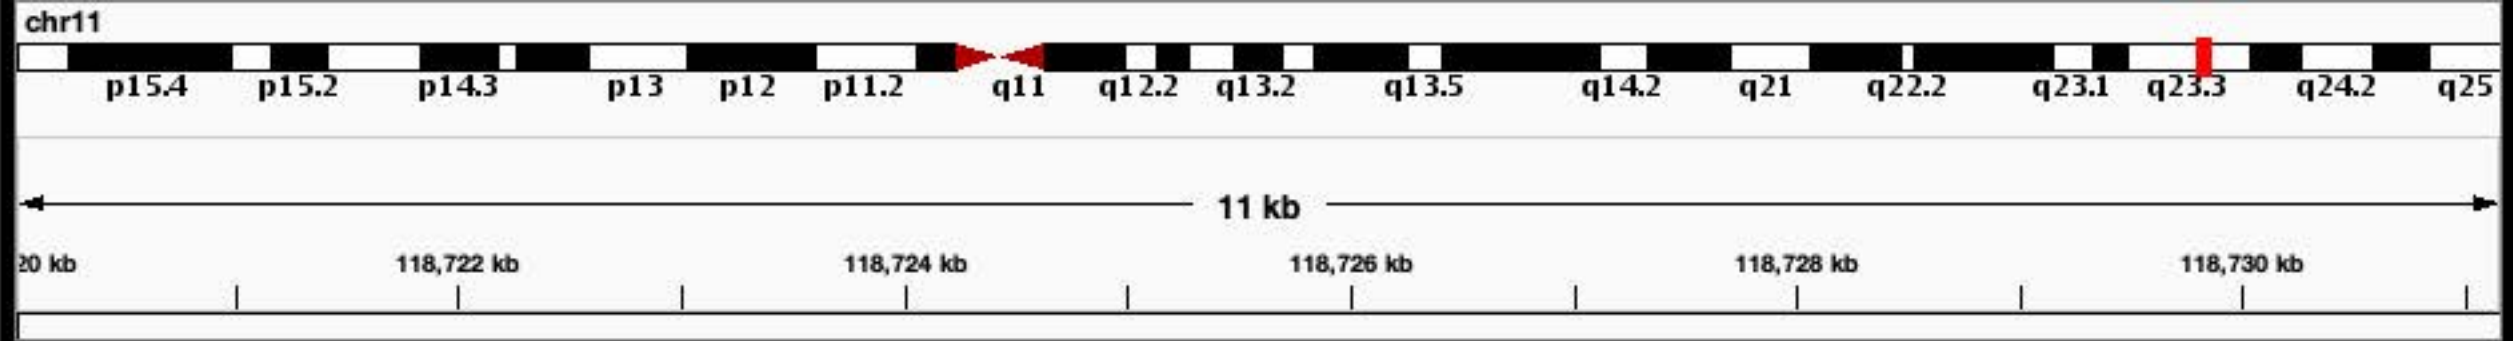

Gene

hg38.subramanianT1.gtf

hg38.subramanianT2.gtf

transcripts.gtf

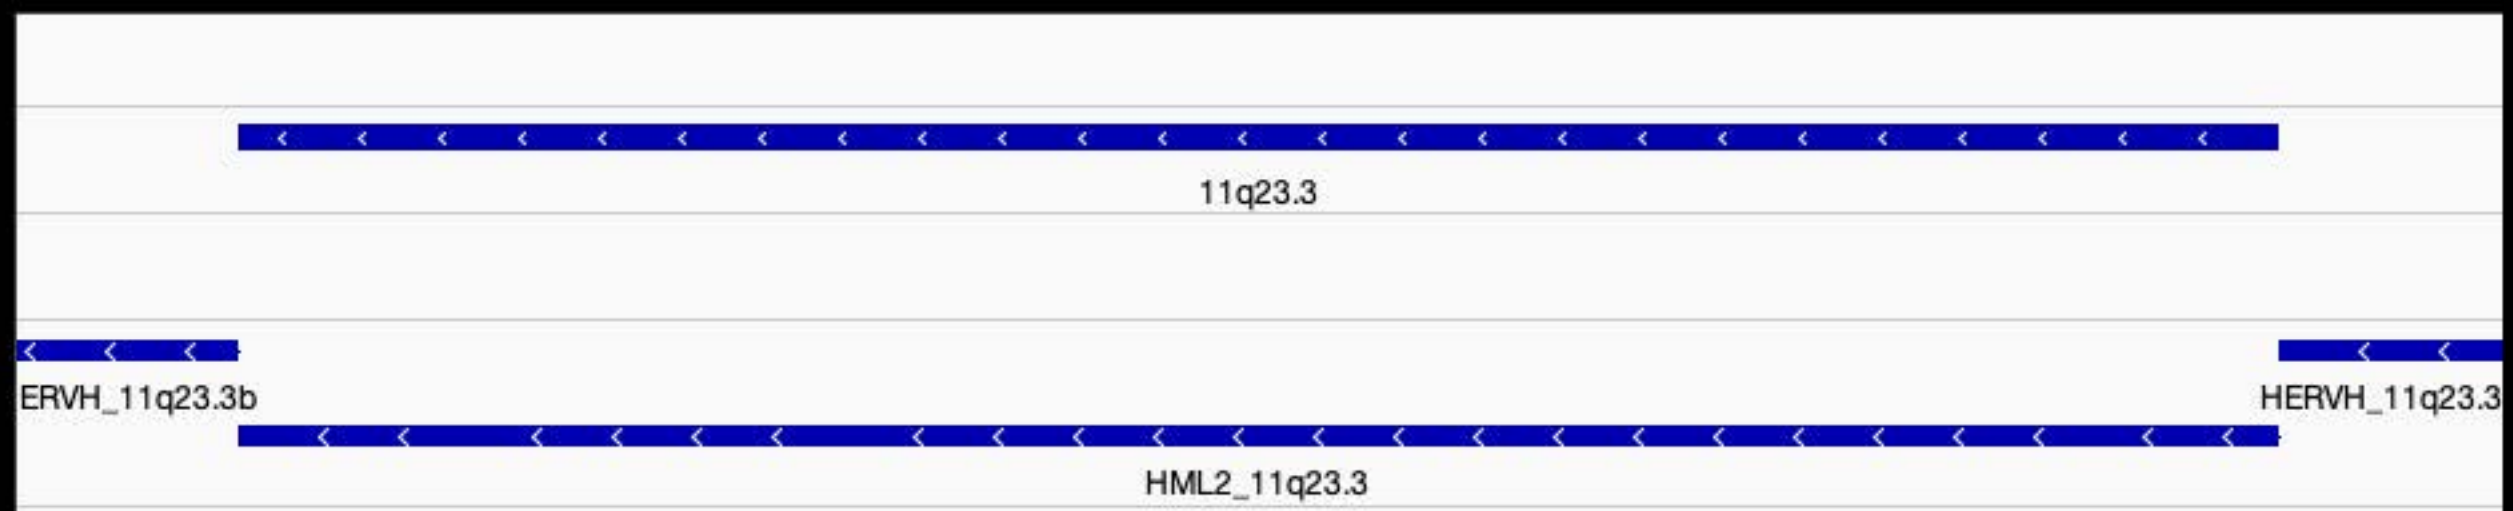



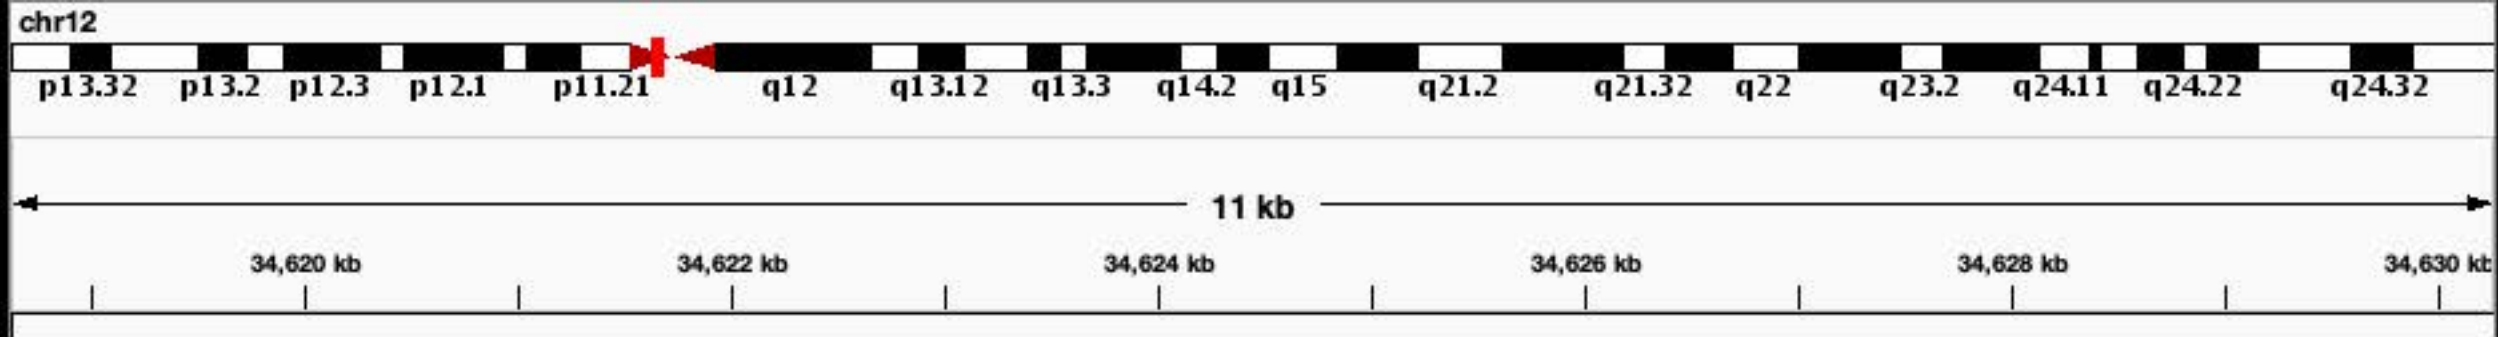

Gene

hg38.subramanianT1.gtf

hg38.subramanianT2.gtf

transcripts.gtf

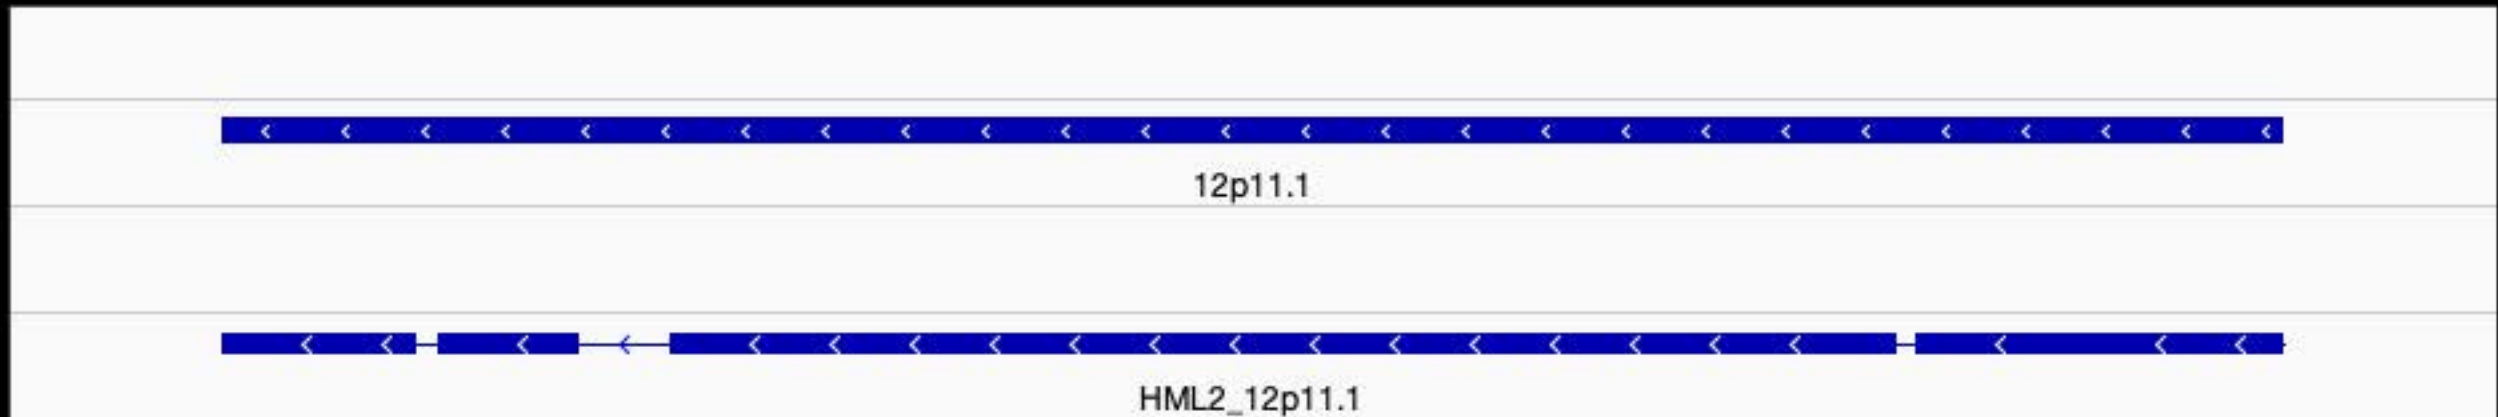

chr12

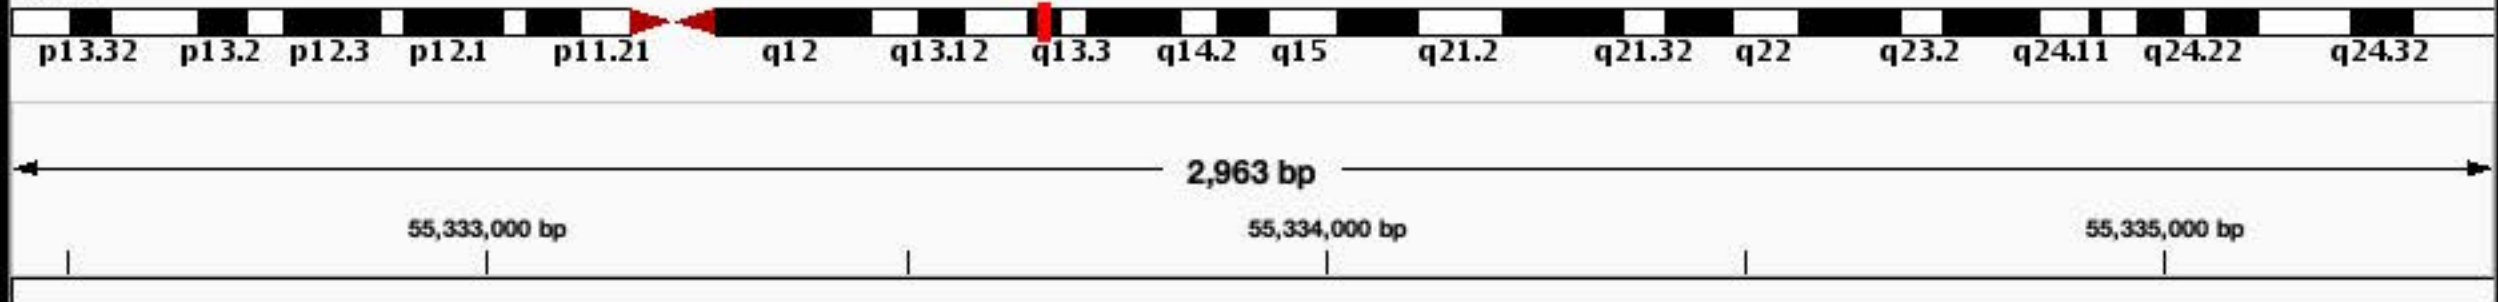

- Gene
- hg38.subramanianT1.gtf
- hg38.subramanianT2.gtf
- transcripts.gtf

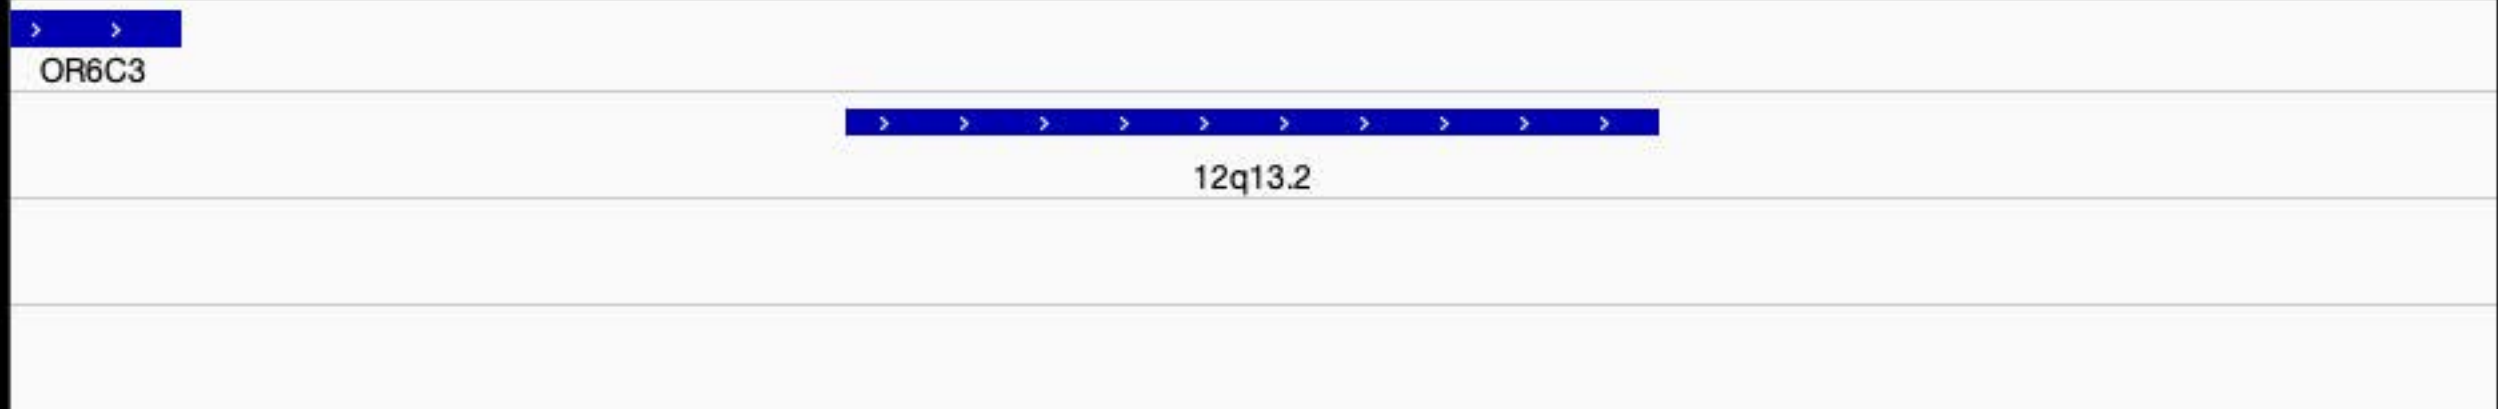

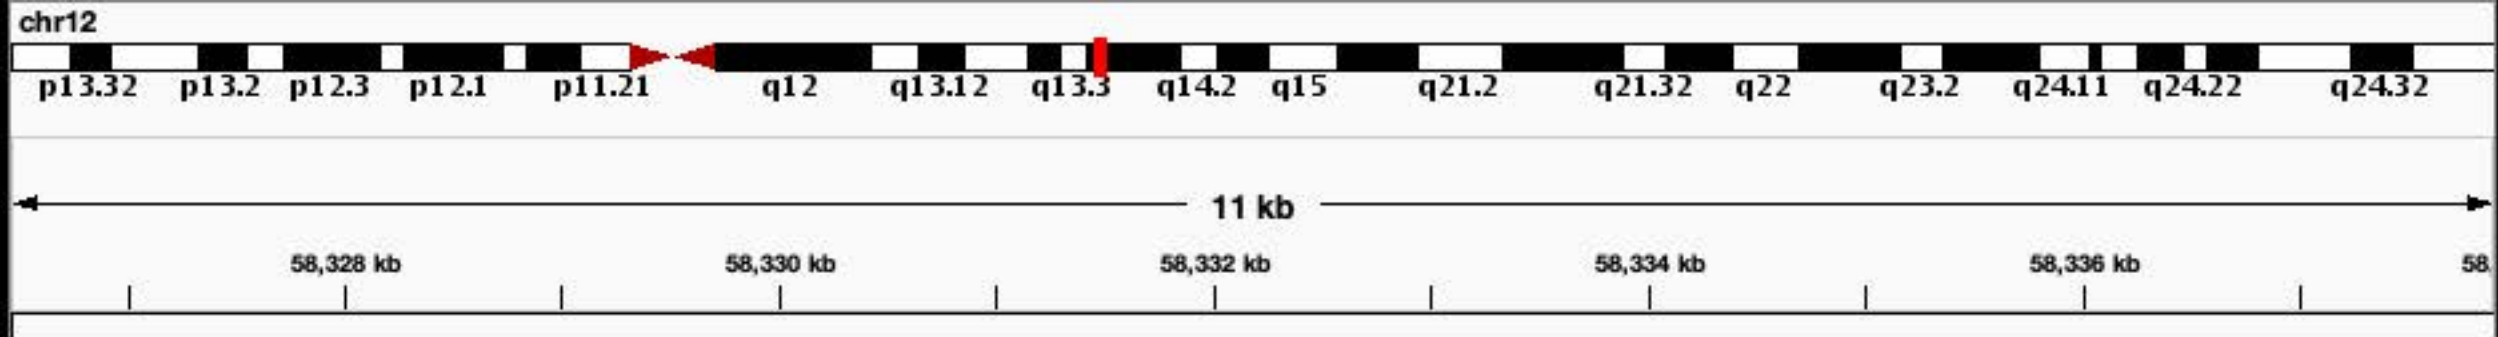

Gene

hg38.subramanianT1.gtf

hg38.subramanianT2.gtf

transcripts.gtf

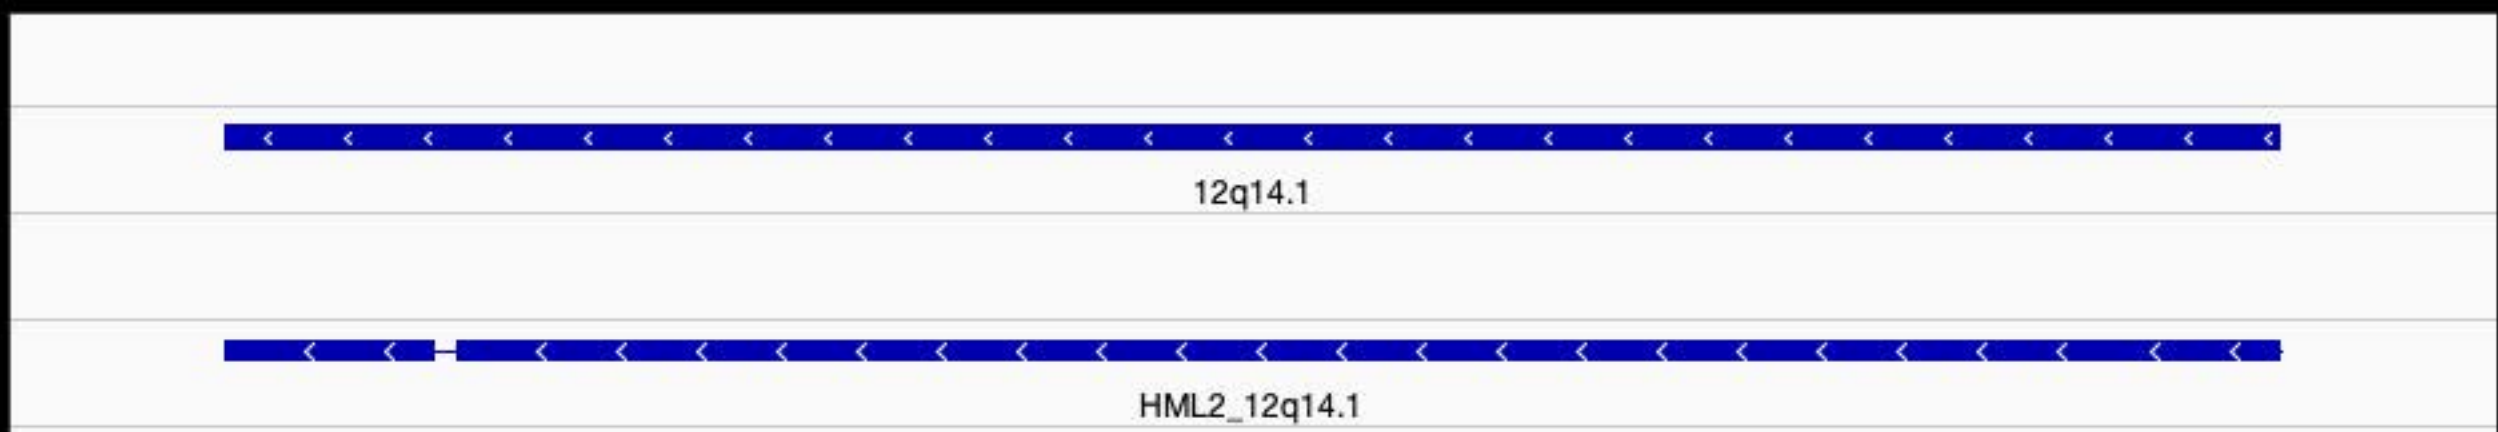

chr12

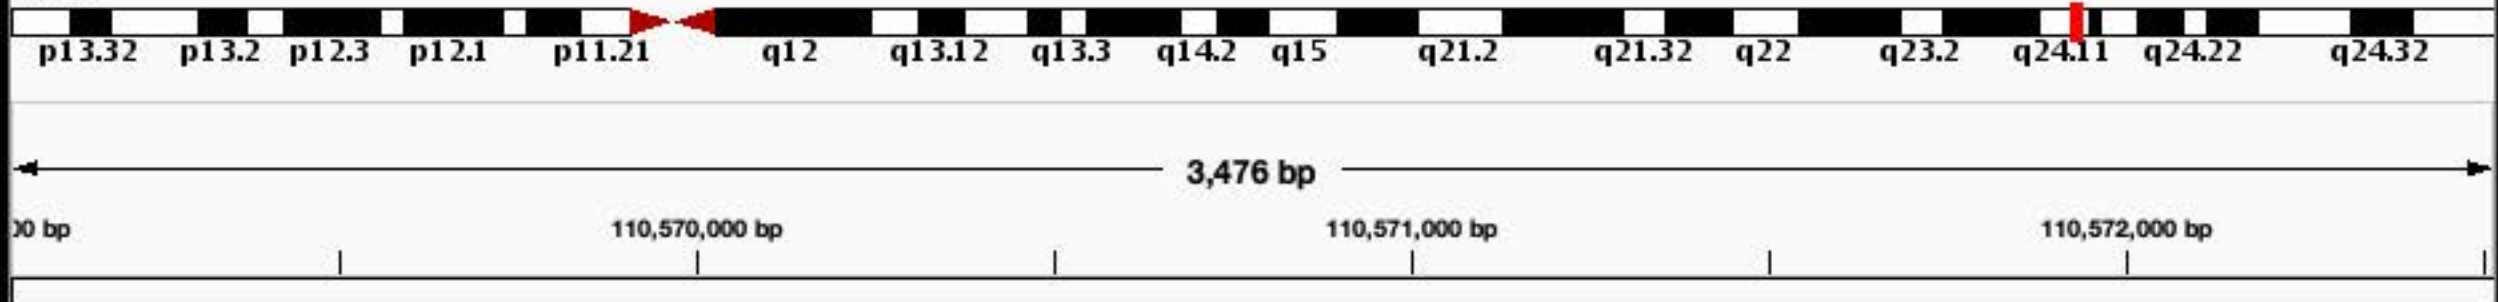

- Gene
- hg38.subramanianT1.gtf
- hg38.subramanianT2.gtf
- transcripts.gtf

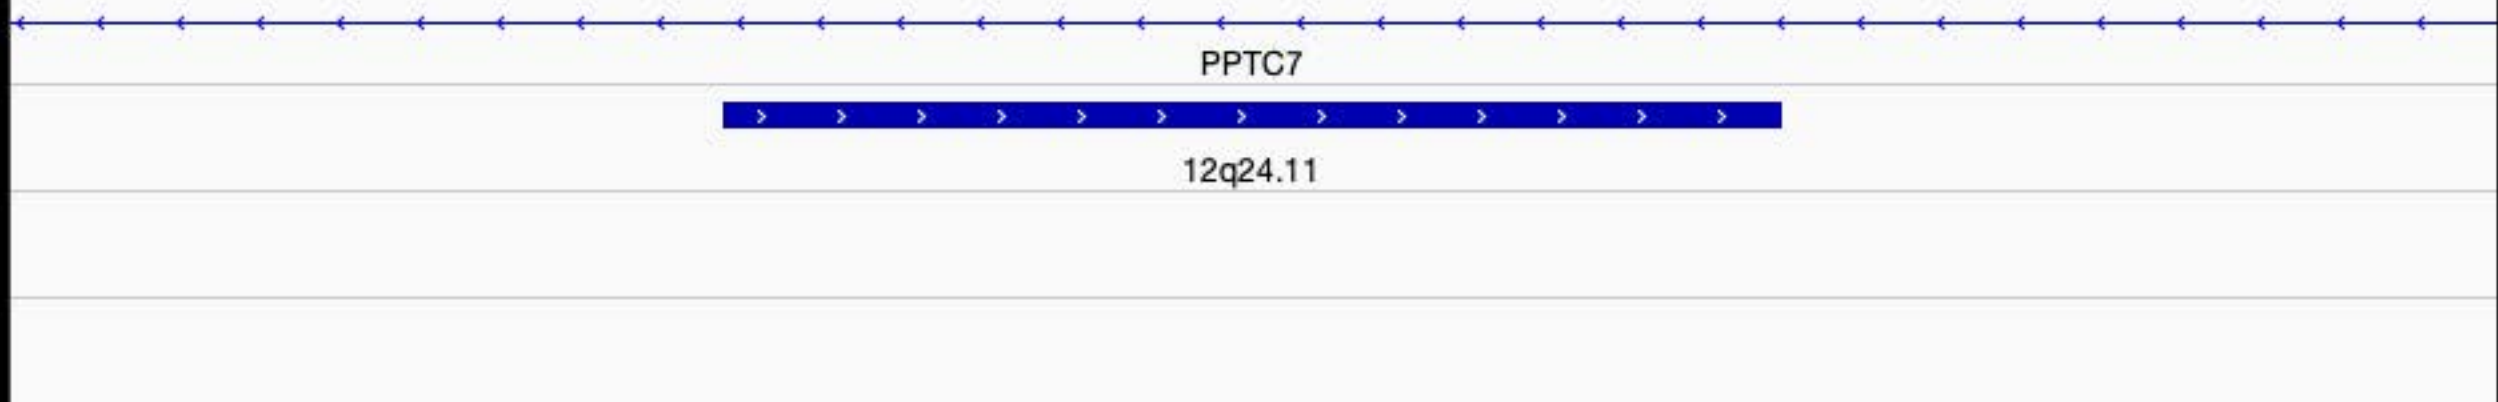

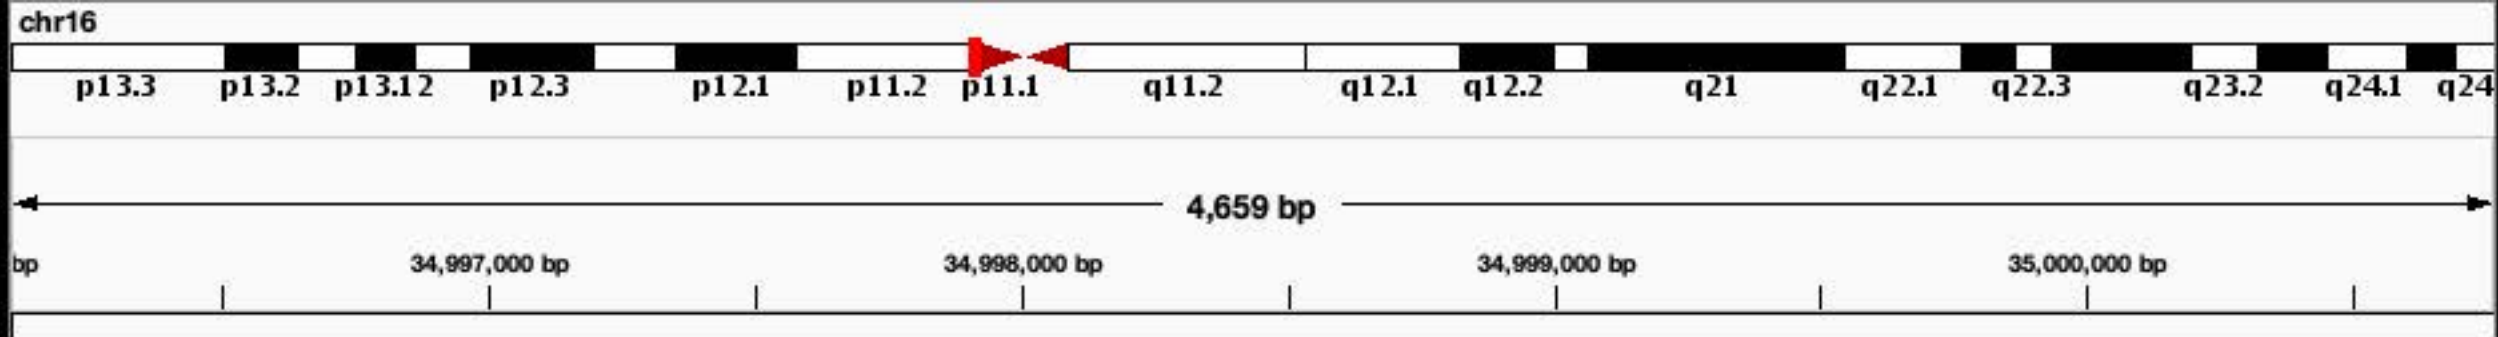

Gene

hg38.subramanianT1.gtf

hg38.subramanianT2.gtf

transcripts.gtf

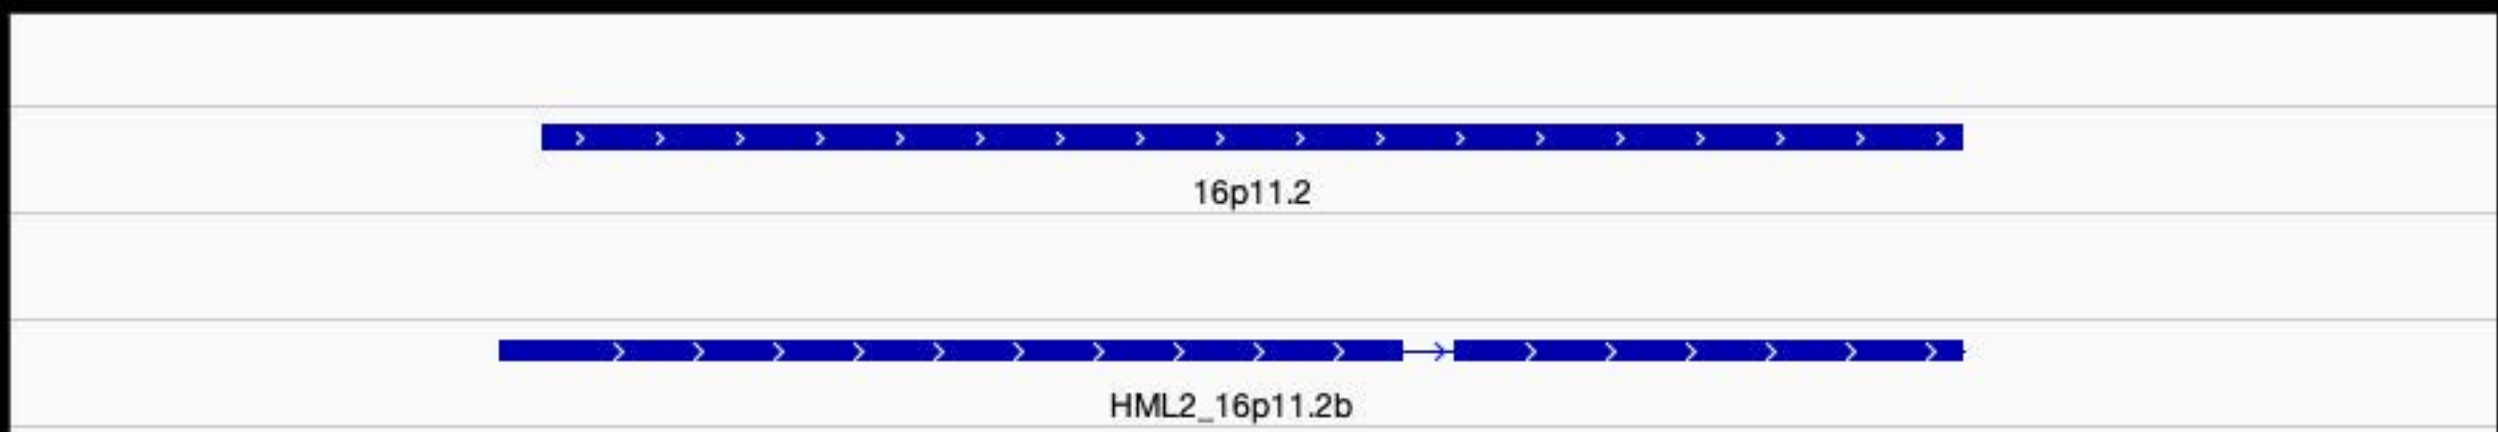

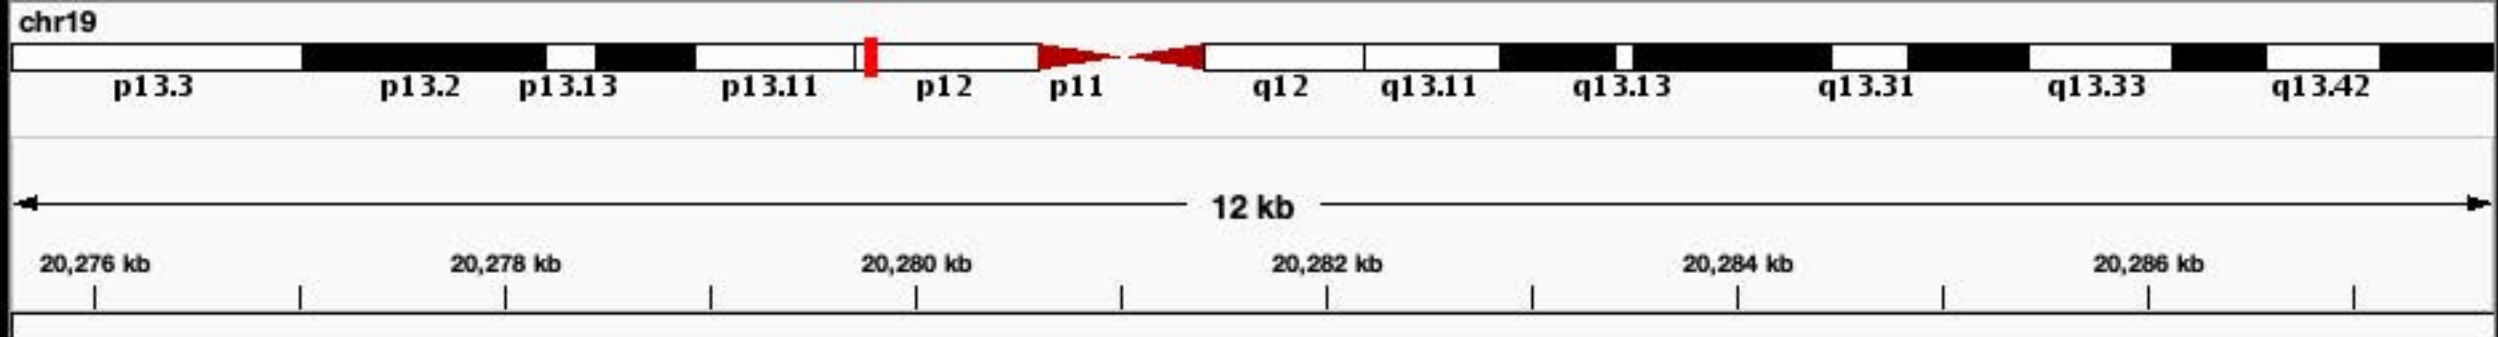

Gene

hg38.subramanianT1.gtf

hg38.subramanianT2.gtf

transcripts.gtf

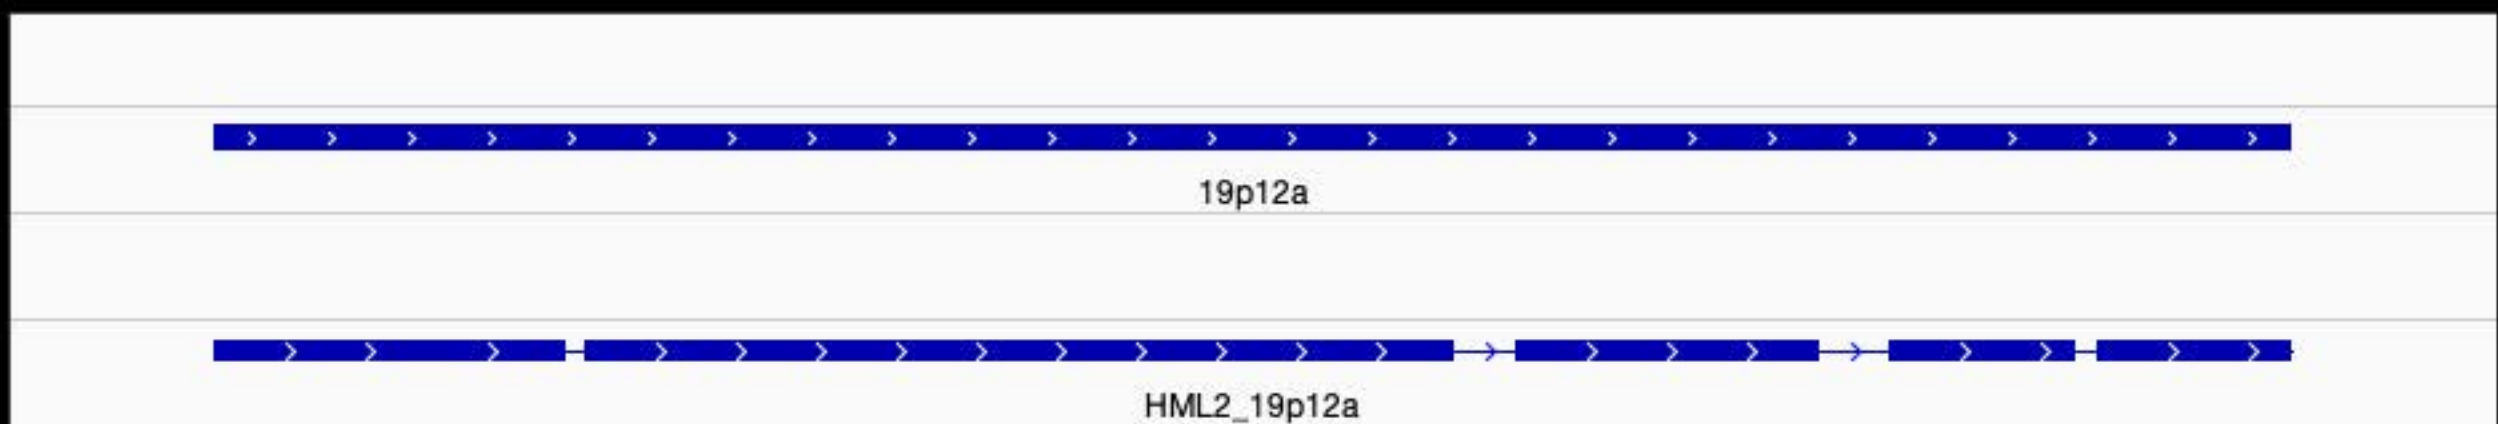

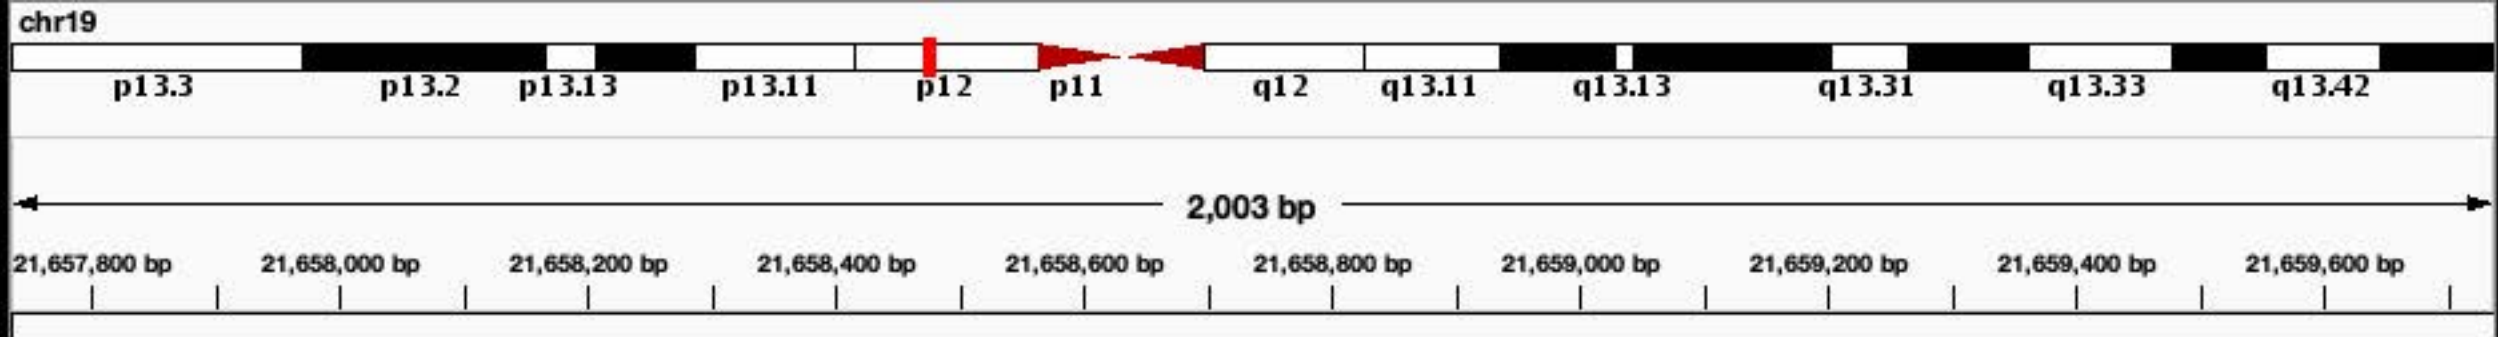

Gene

hg38.subramanianT1.gtf

hg38.subramanianT2.gtf

transcripts.gtf

19p12b

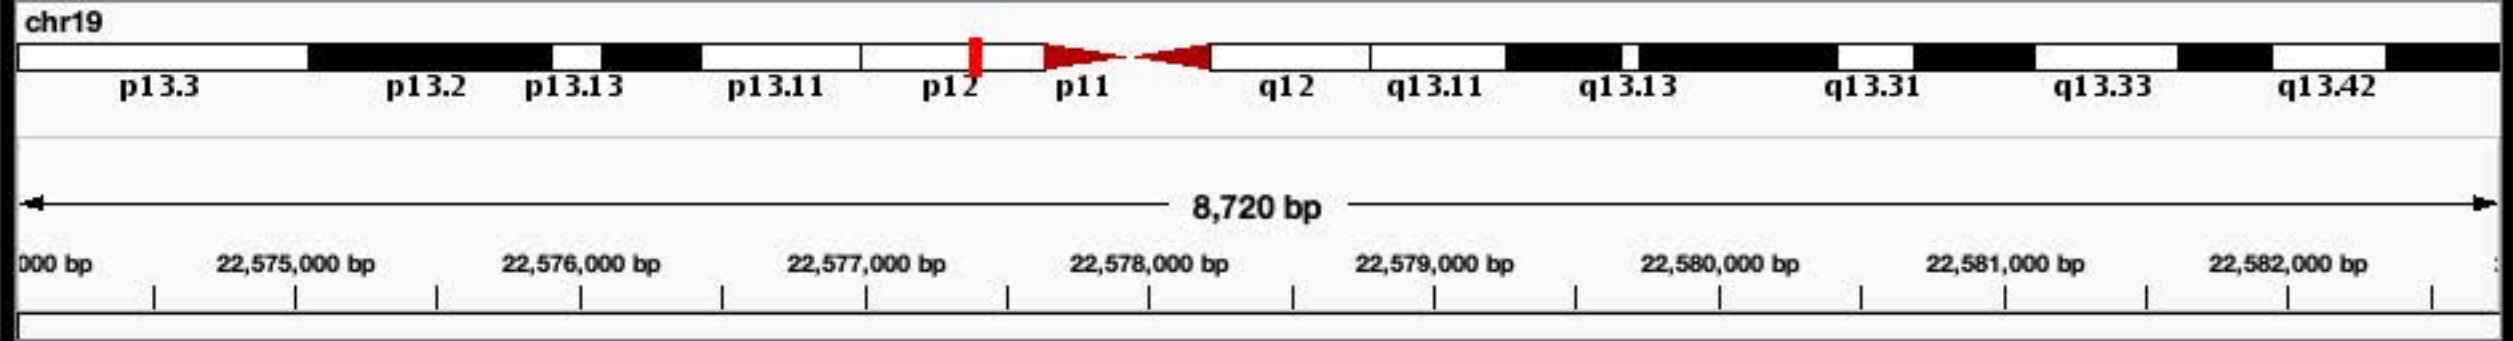

Gene

hg38.subramanianT1.gtf

hg38.subramanianT2.gtf

transcripts.gtf

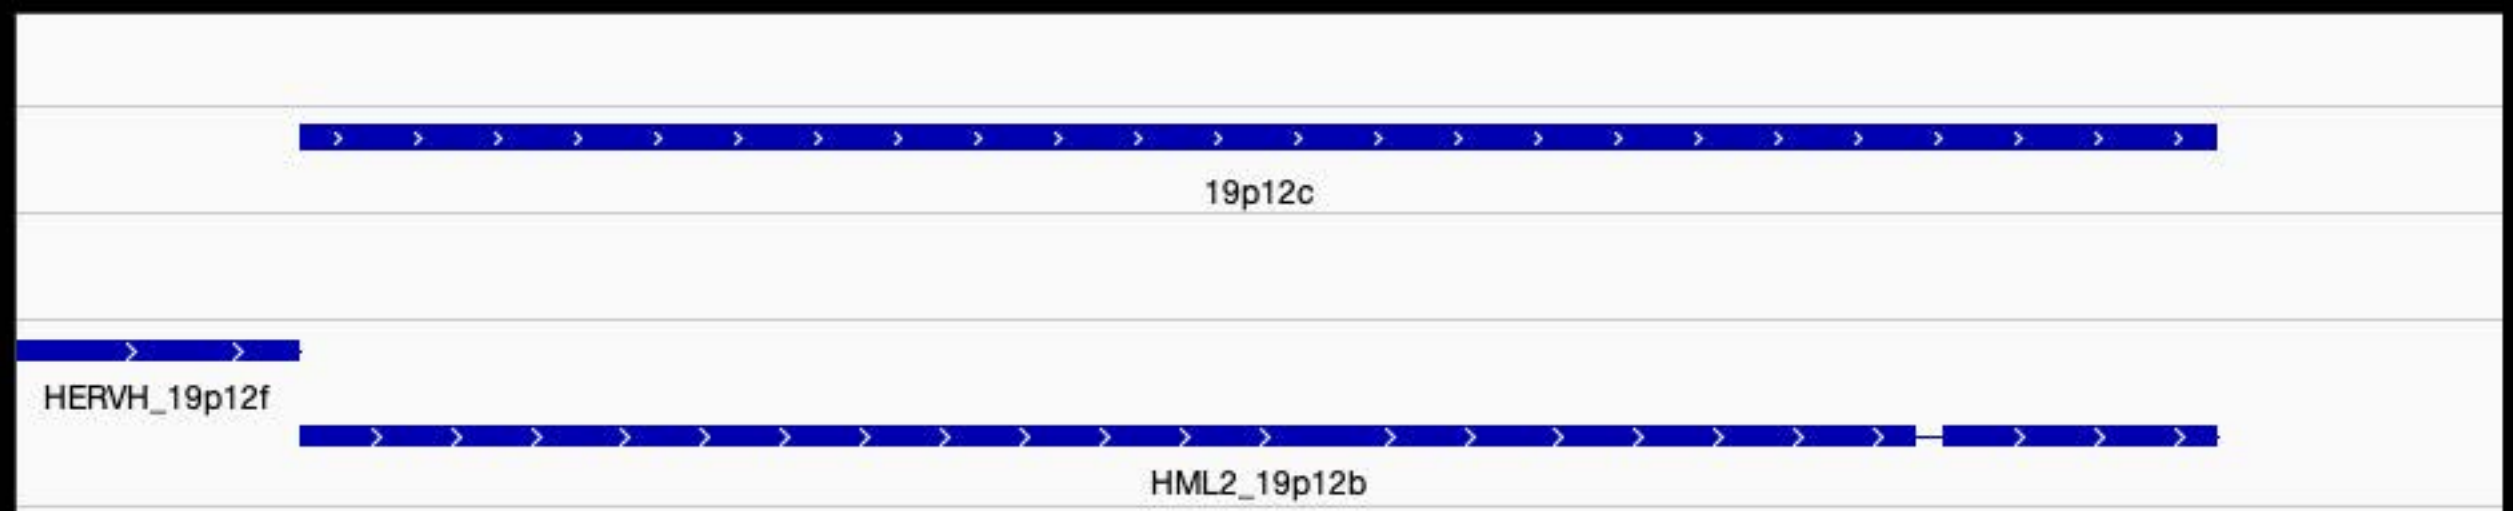



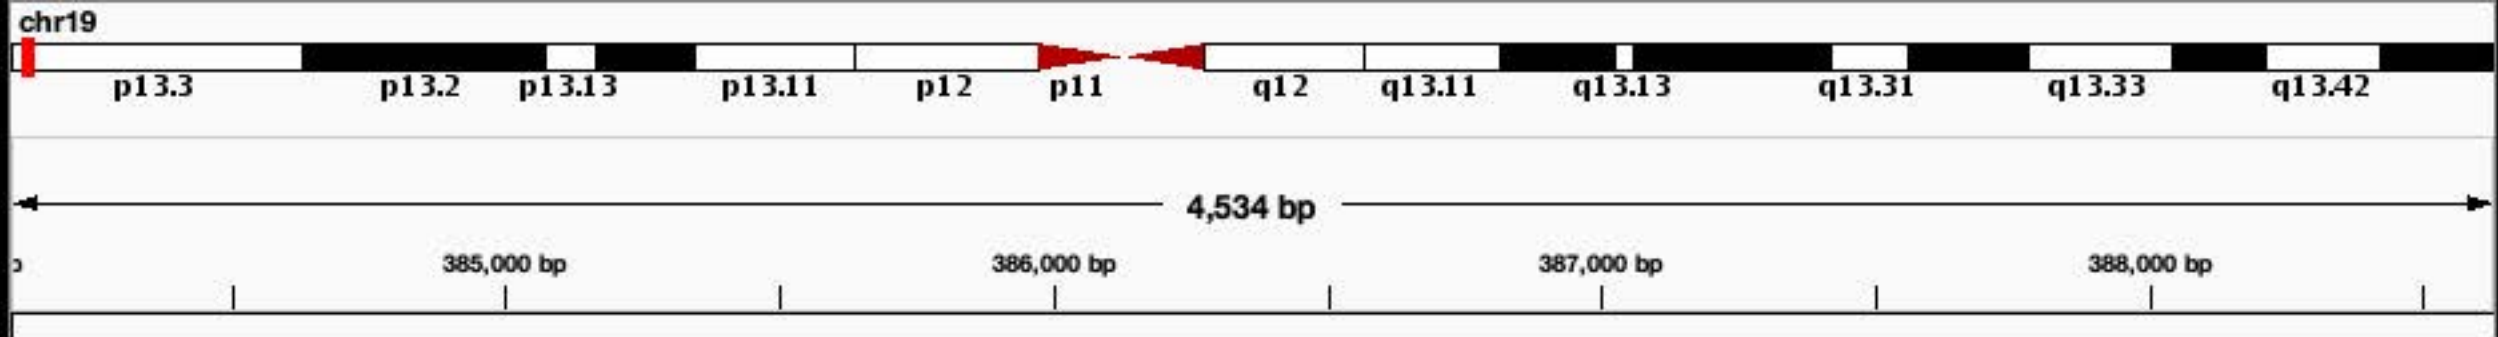

Gene

hg38.subramanianT1.gtf

hg38.subramanianT2.gtf

transcripts.gtf

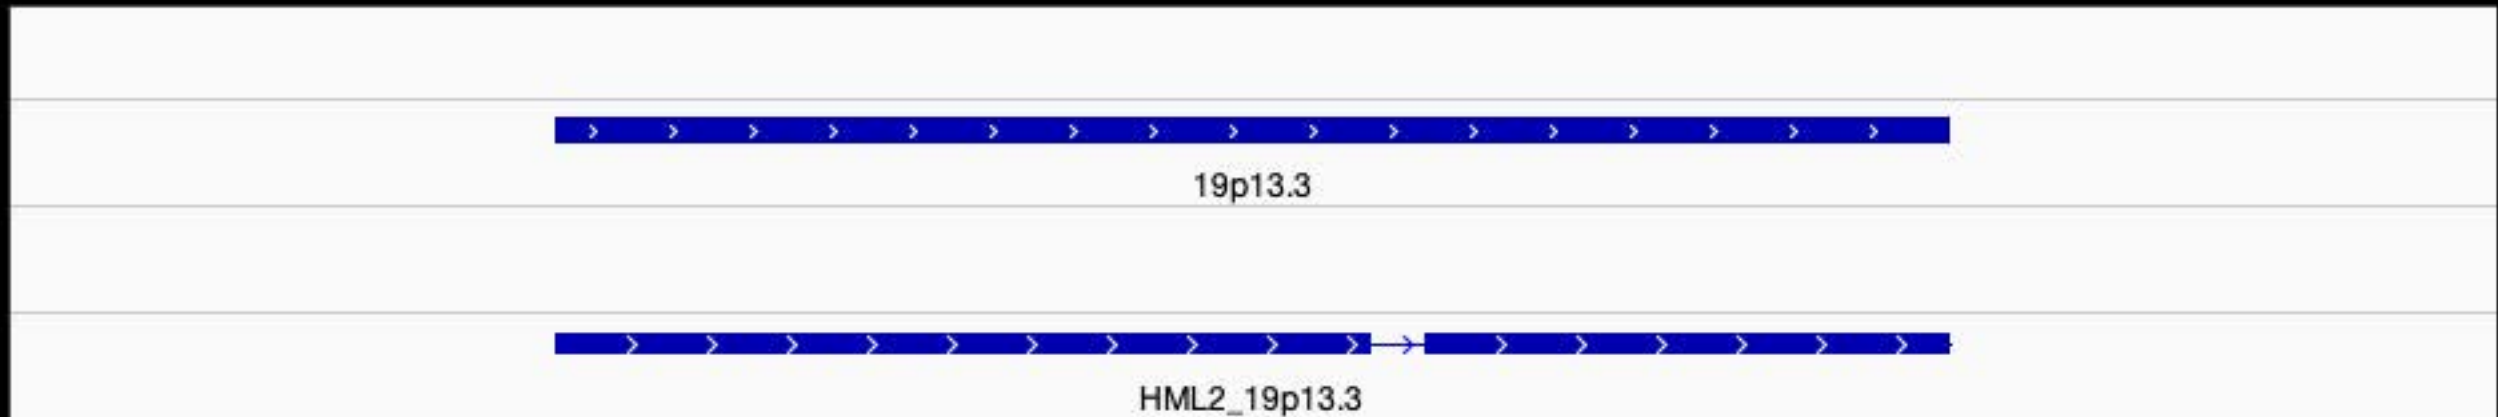

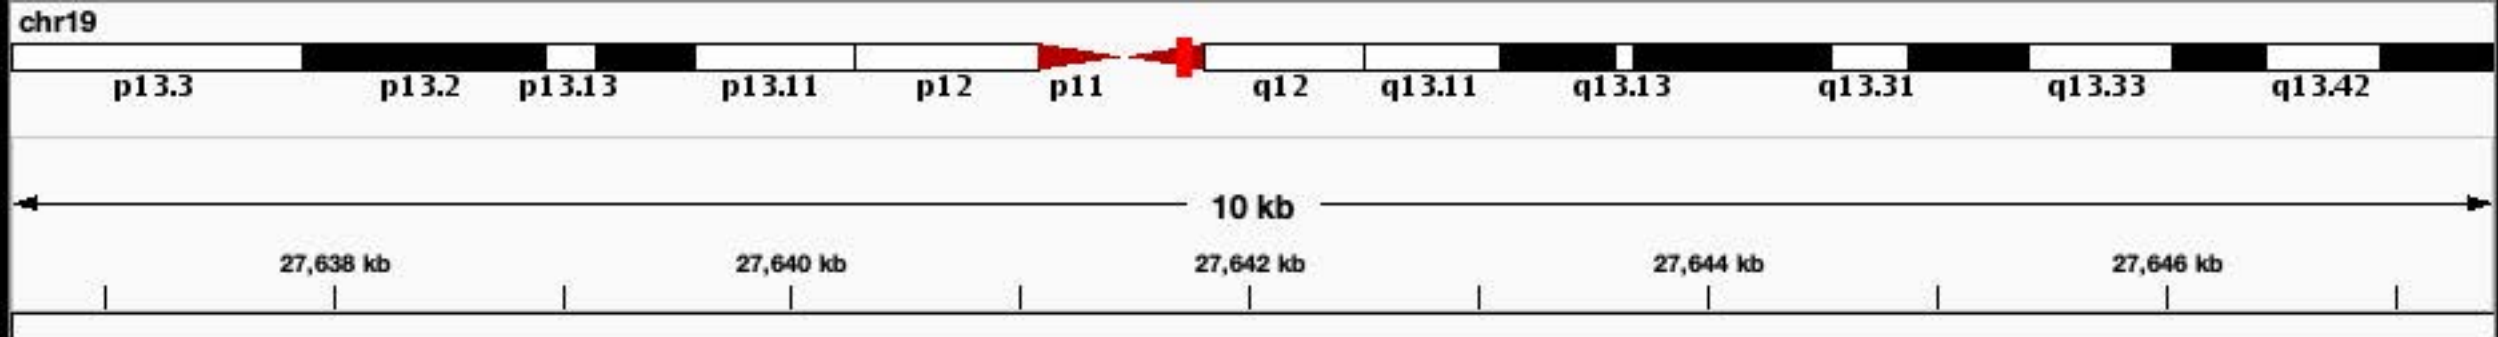

Gene

hg38.subramanianT1.gtf

hg38.subramanianT2.gtf

transcripts.gtf

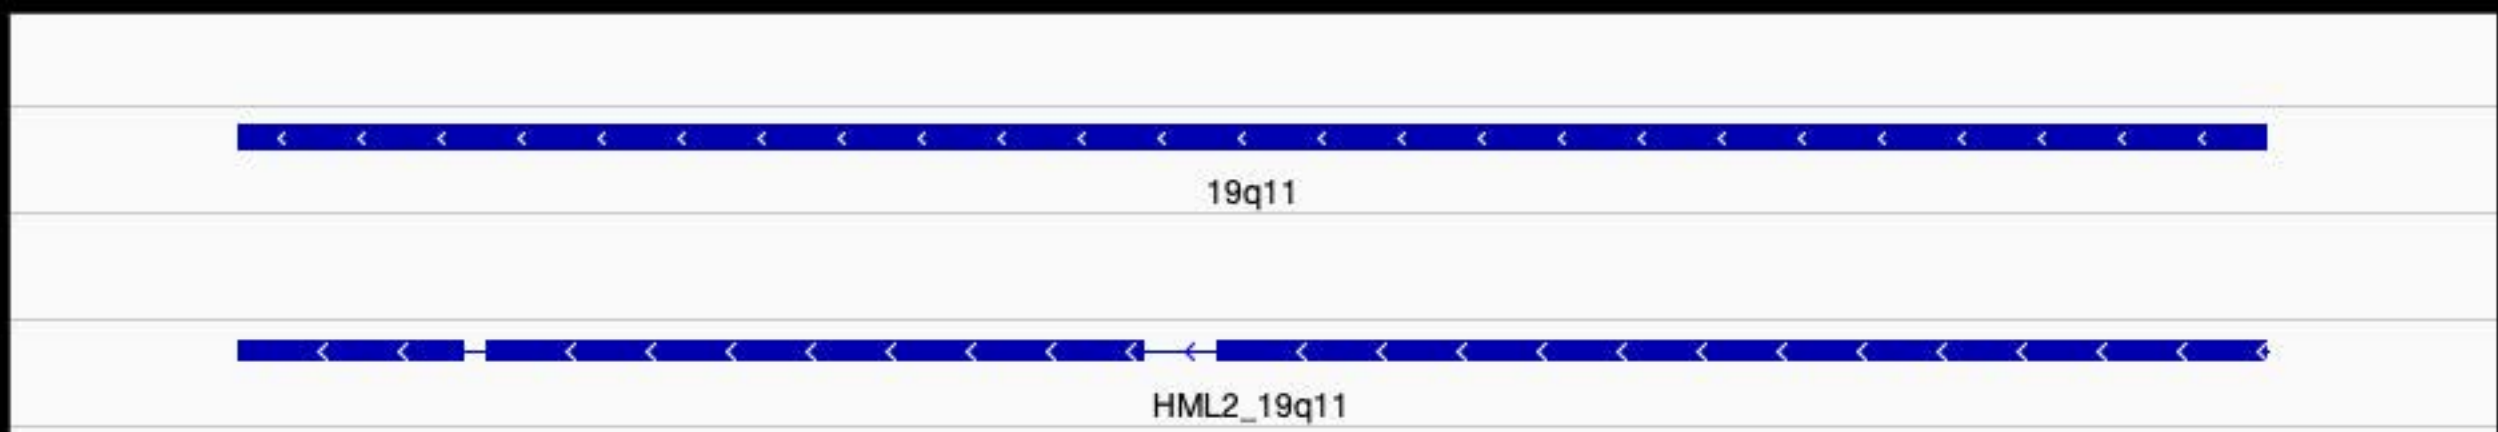

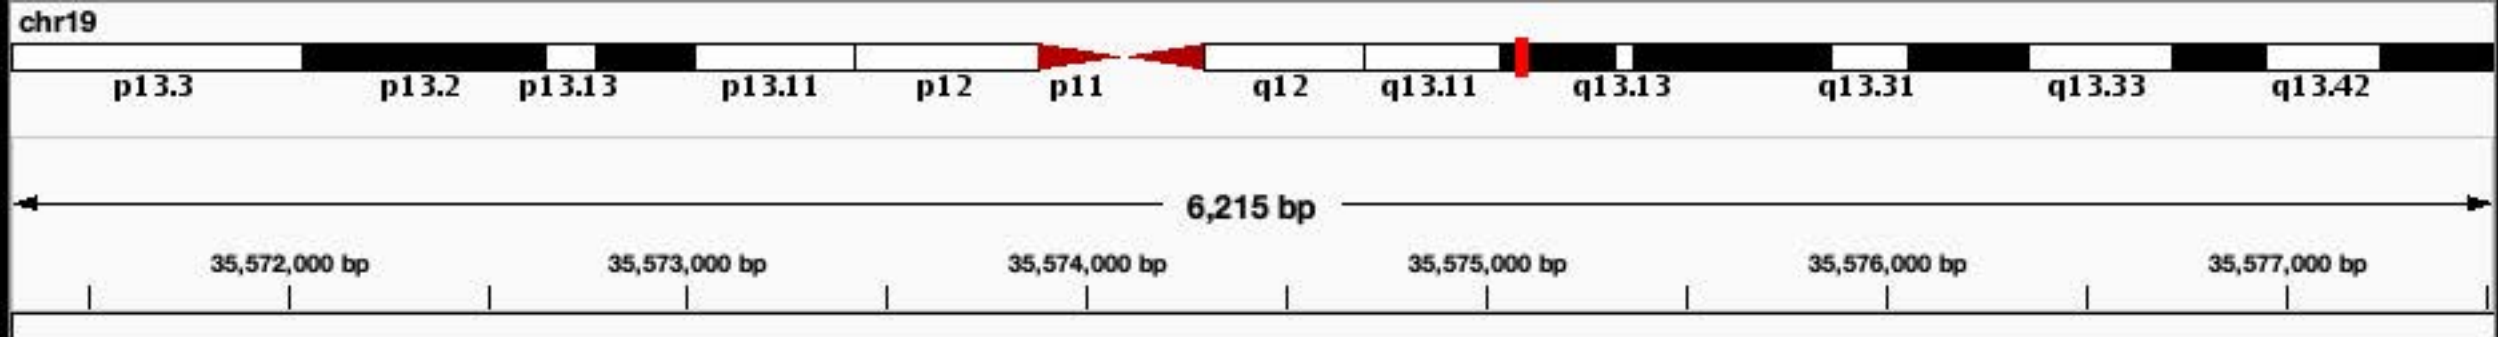

Gene

hg38.subramanianT1.gtf

hg38.subramanianT2.gtf

transcripts.gtf

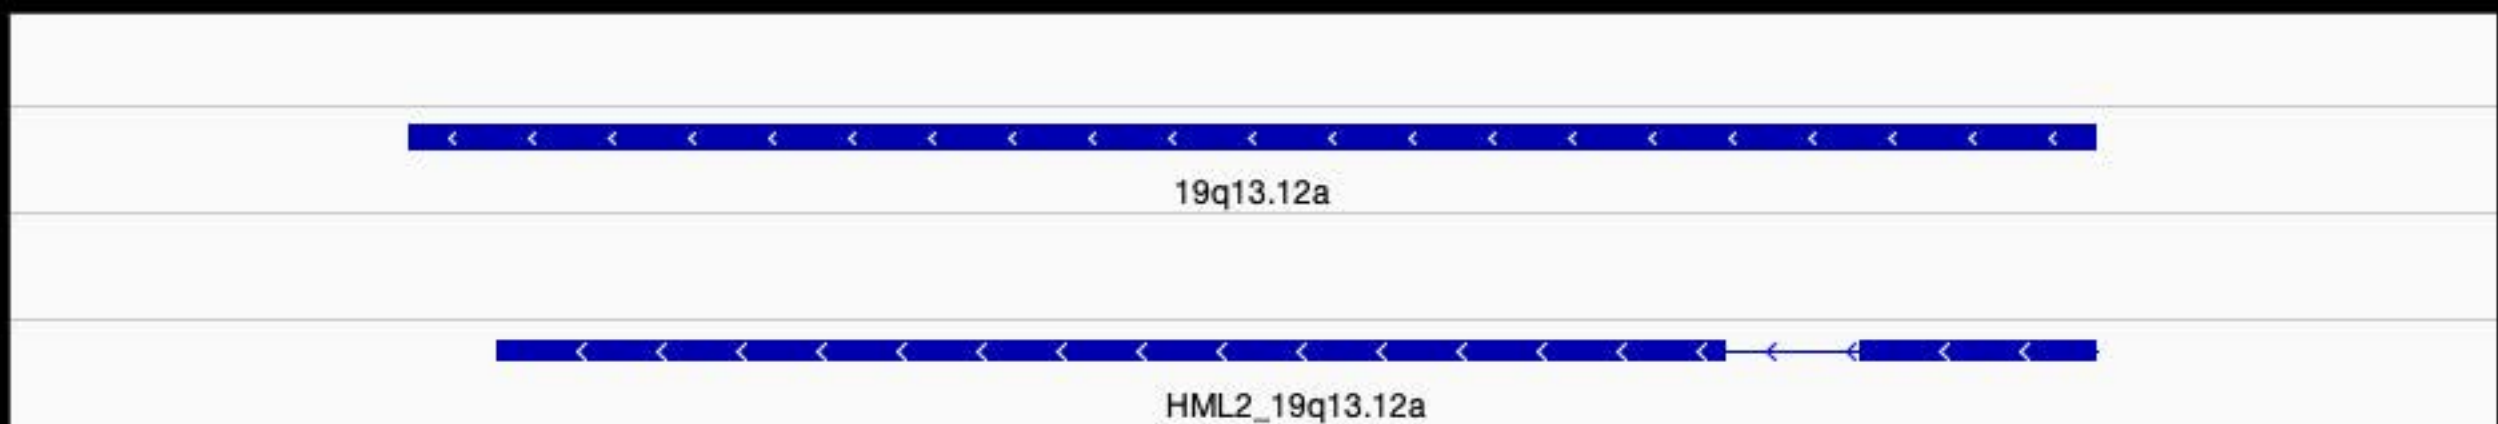

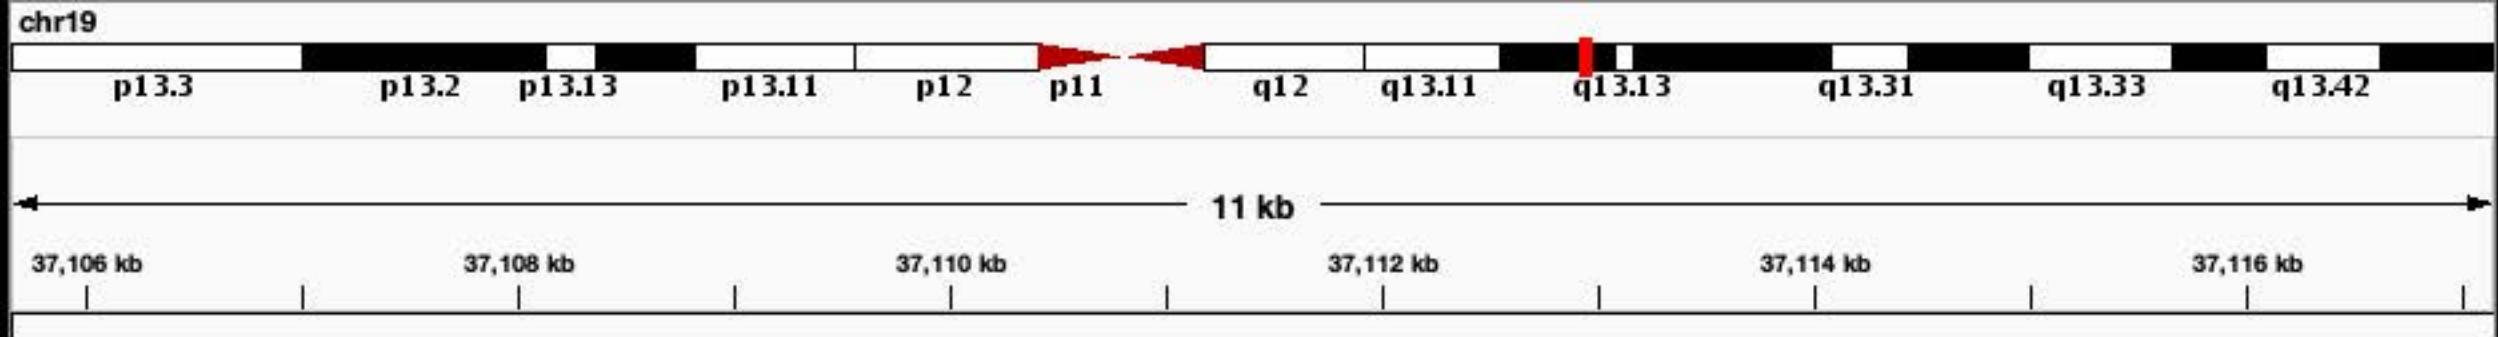

Gene

hg38.subramanianT1.gtf

hg38.subramanianT2.gtf

transcripts.gtf

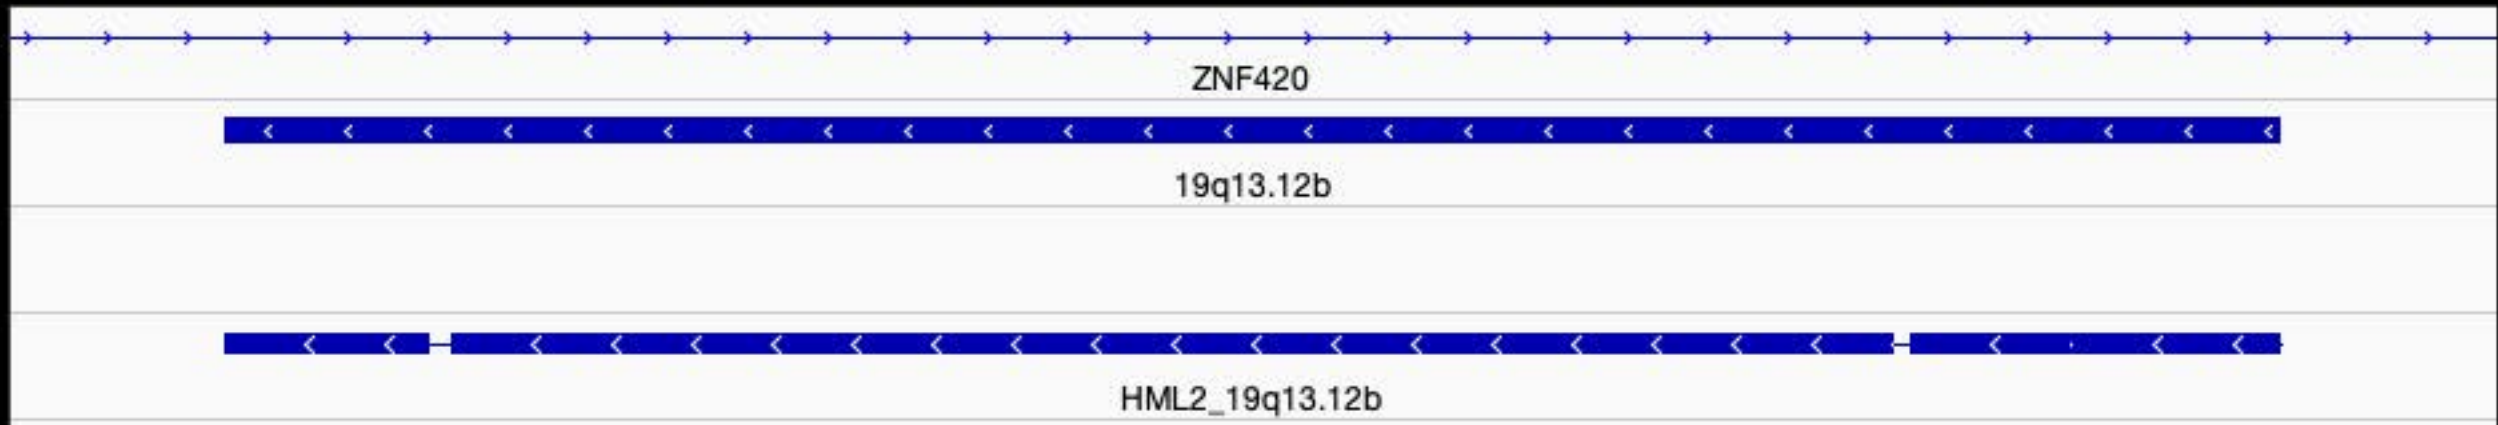

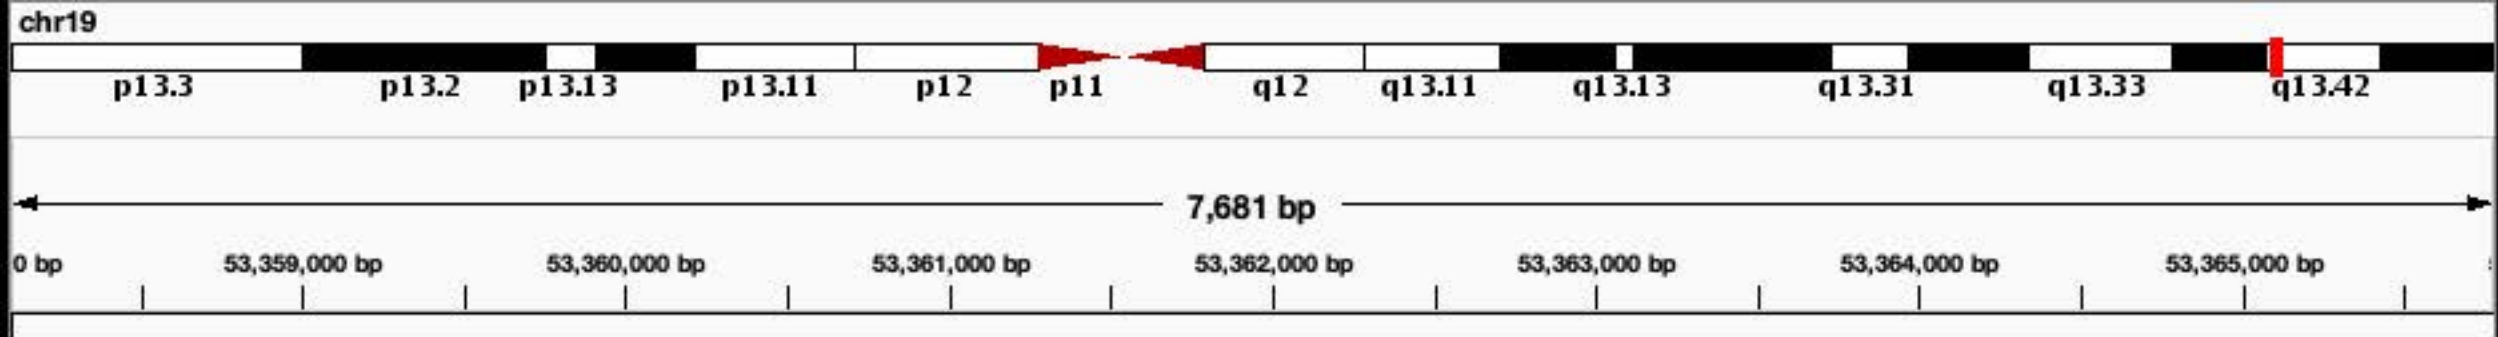

Gene

hg38.subramanianT1.gtf

hg38.subramanianT2.gtf

transcripts.gtf

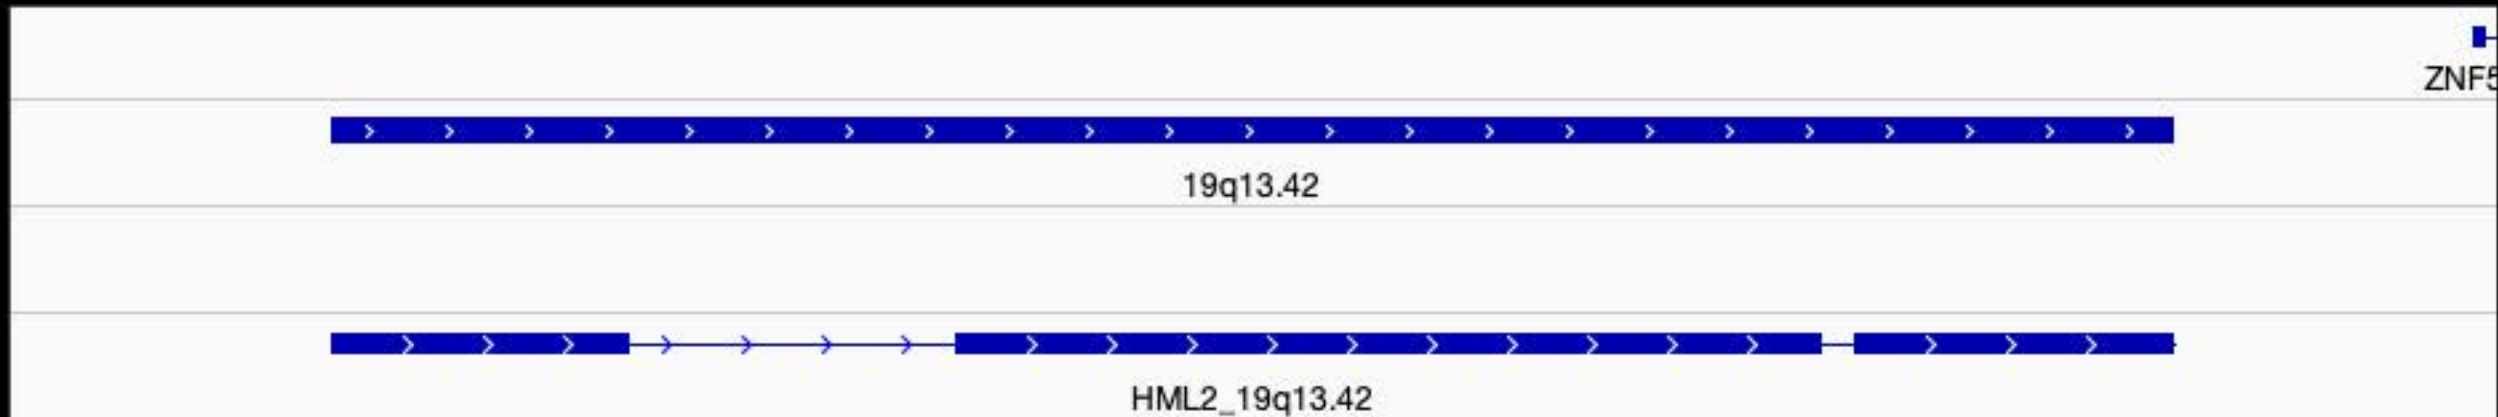

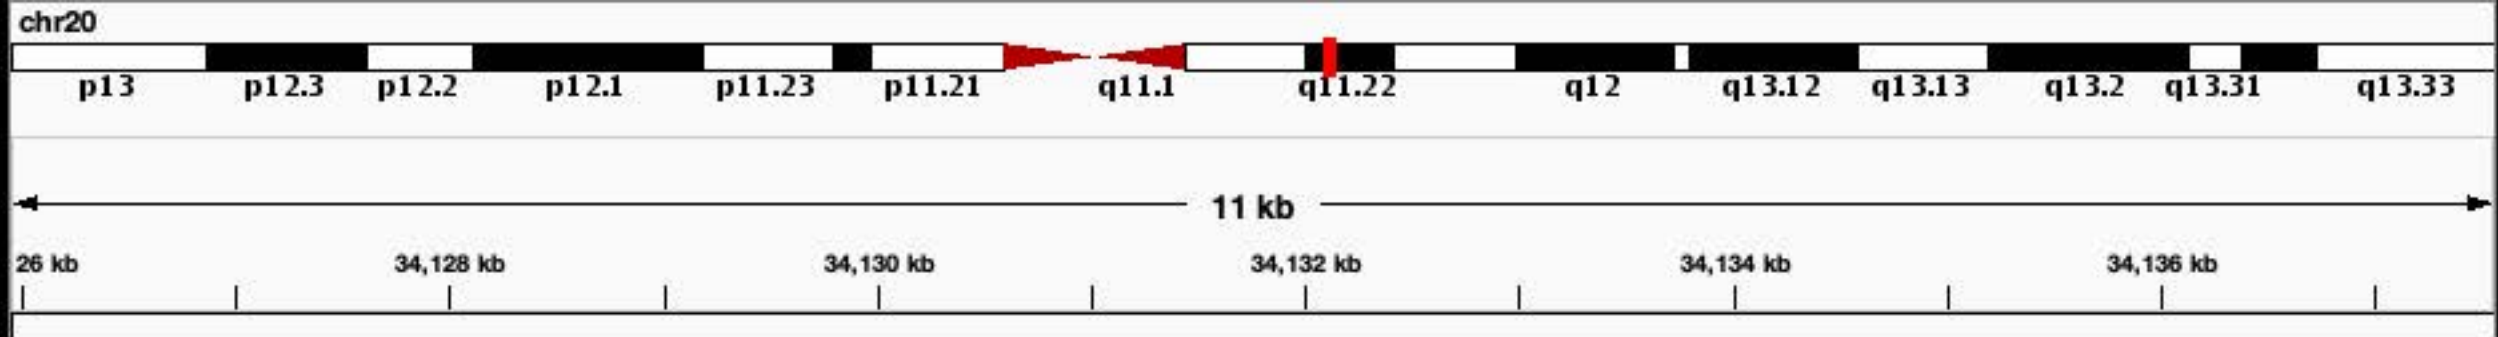

Gene  
hg38.subramanianT1.gtf  
hg38.subramanianT2.gtf  
transcripts.gtf

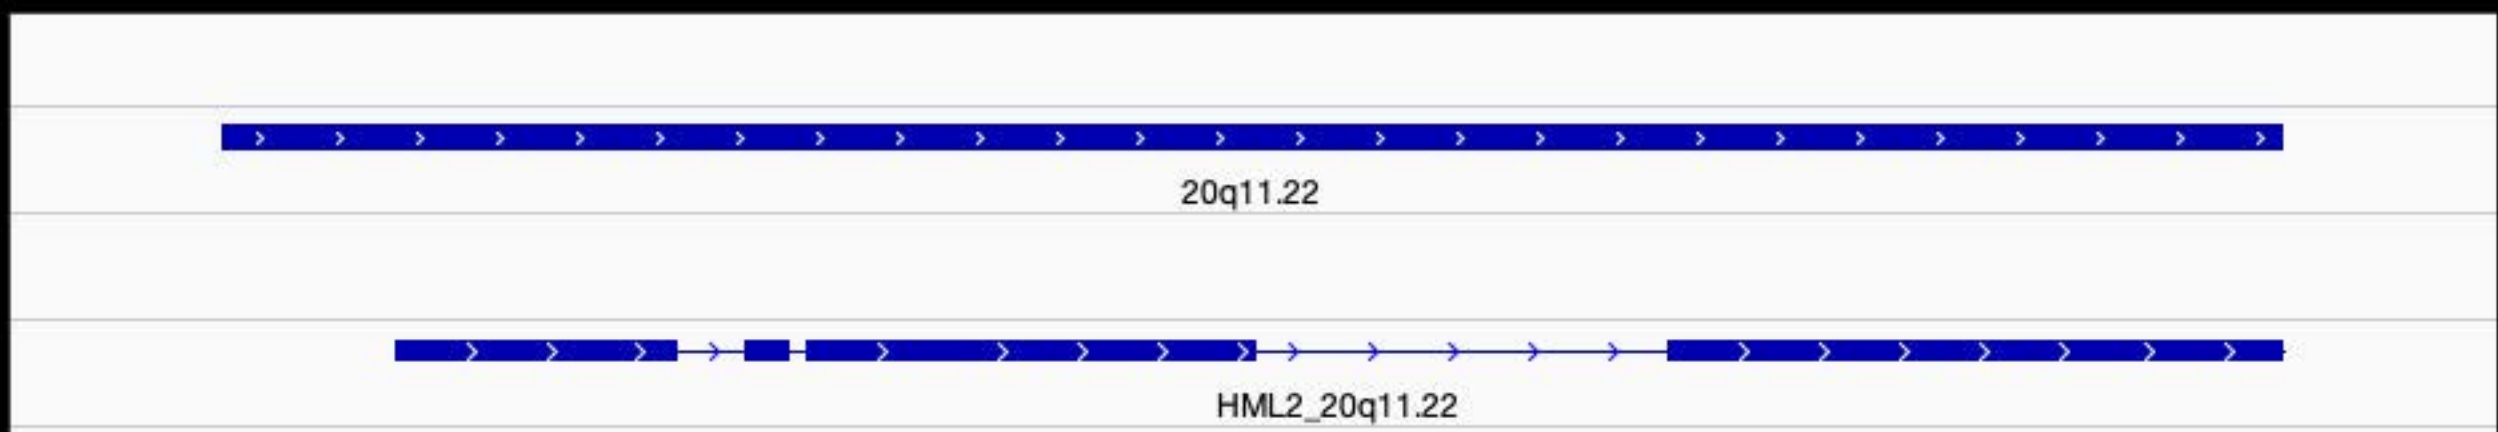

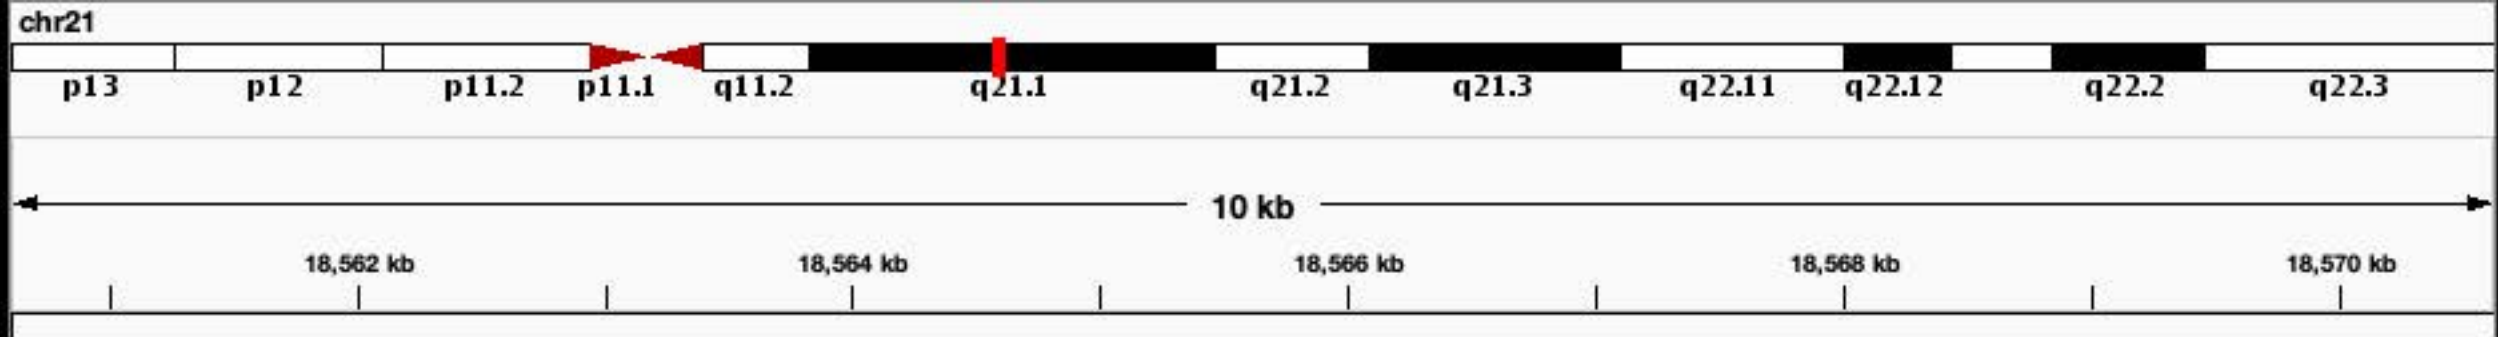

Gene

hg38.subramanianT1.gtf

hg38.subramanianT2.gtf

transcripts.gtf

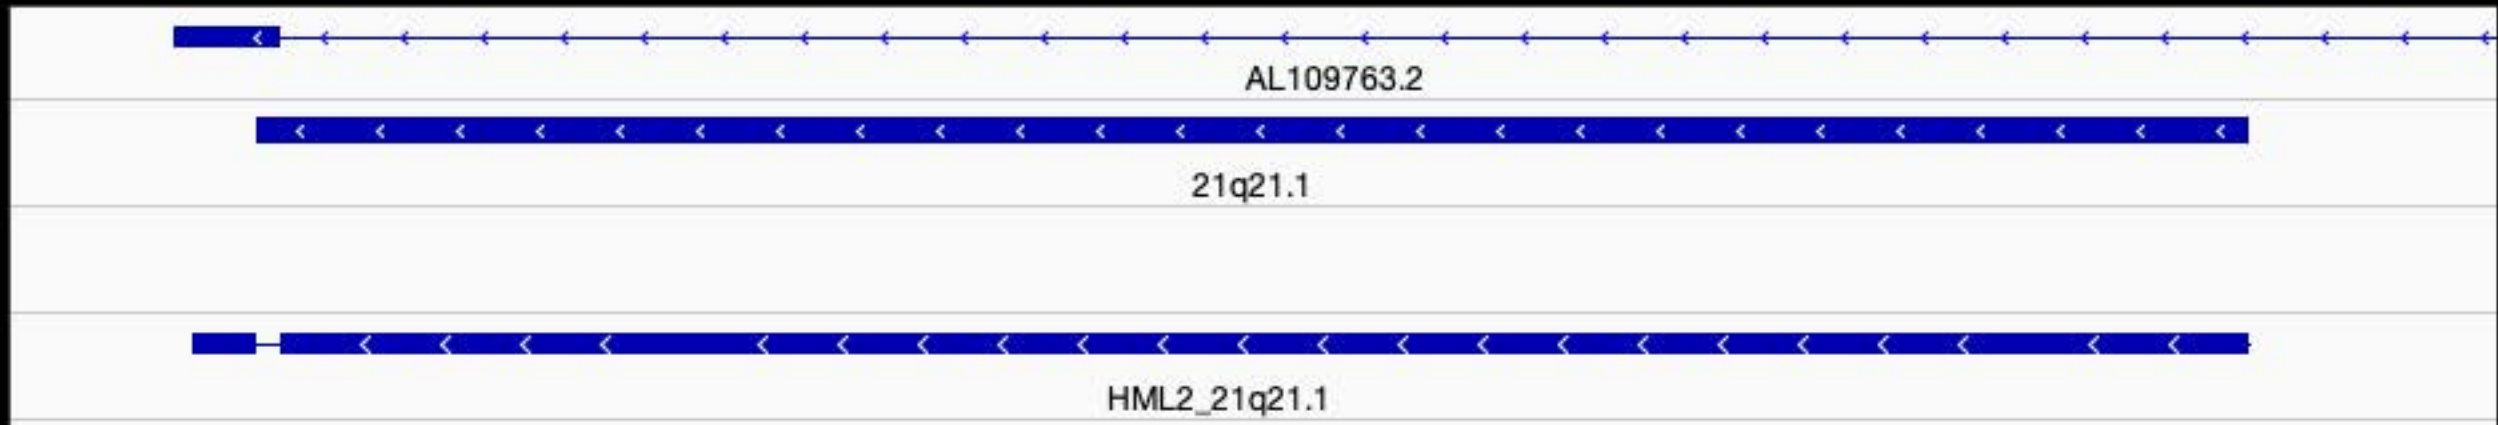

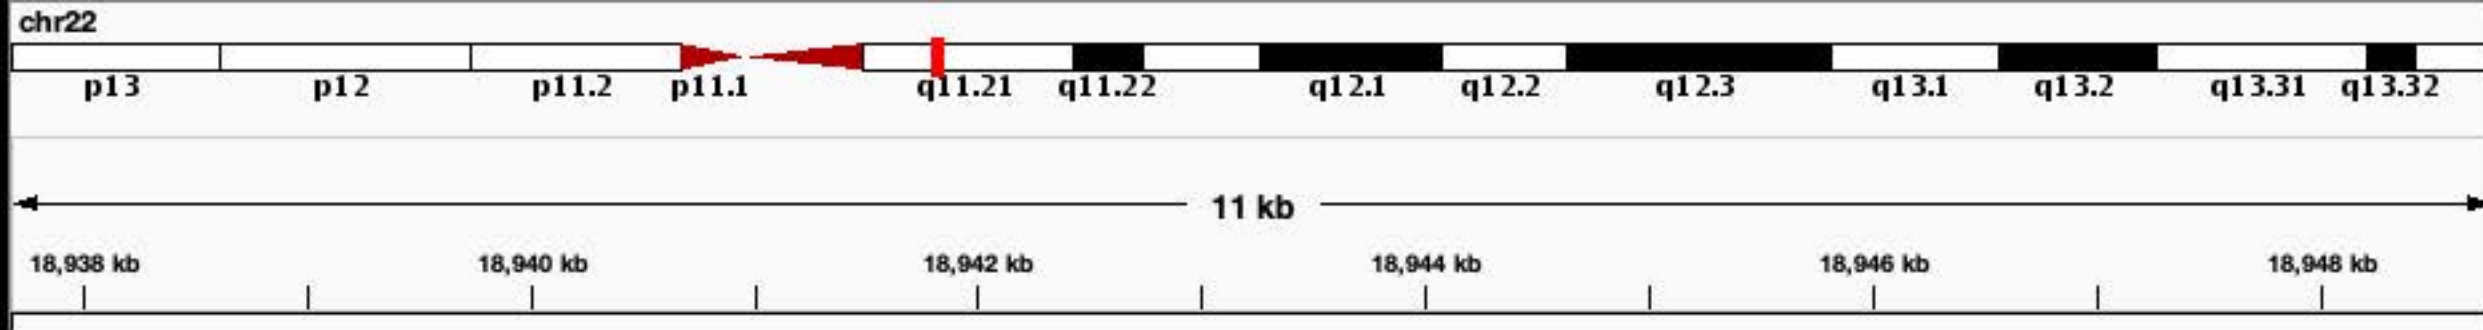

Gene

hg38.subramanianT1.gtf

hg38.subramanianT2.gtf

transcripts.gtf

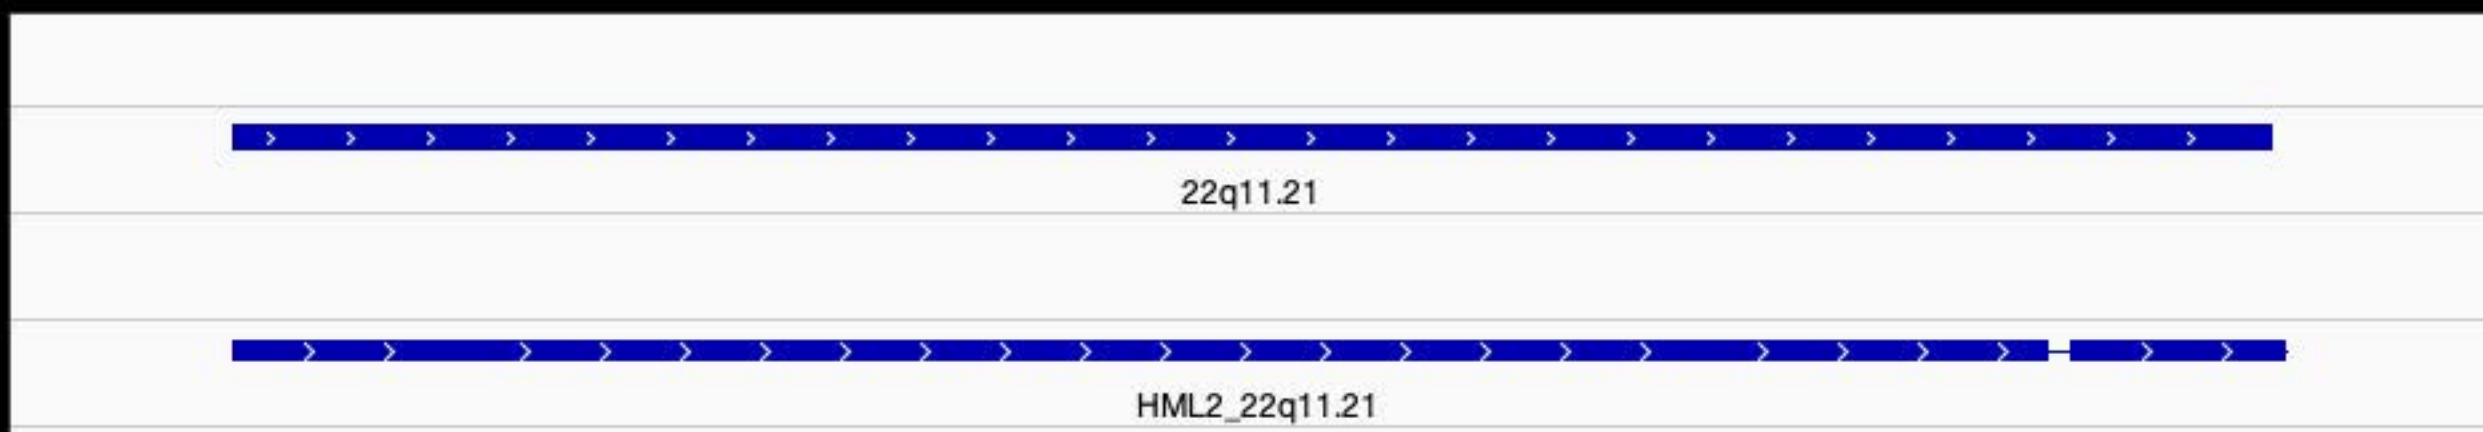



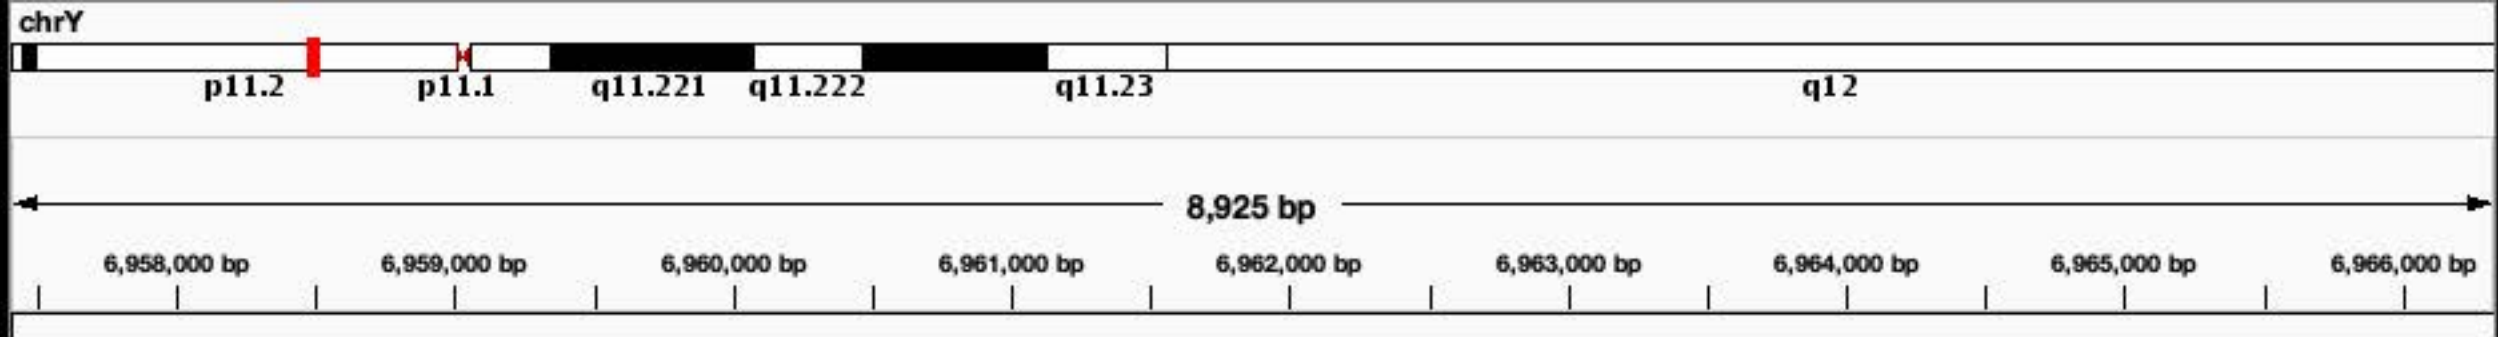

Gene

hg38.subramanianT1.gtf

hg38.subramanianT2.gtf

transcripts.gtf

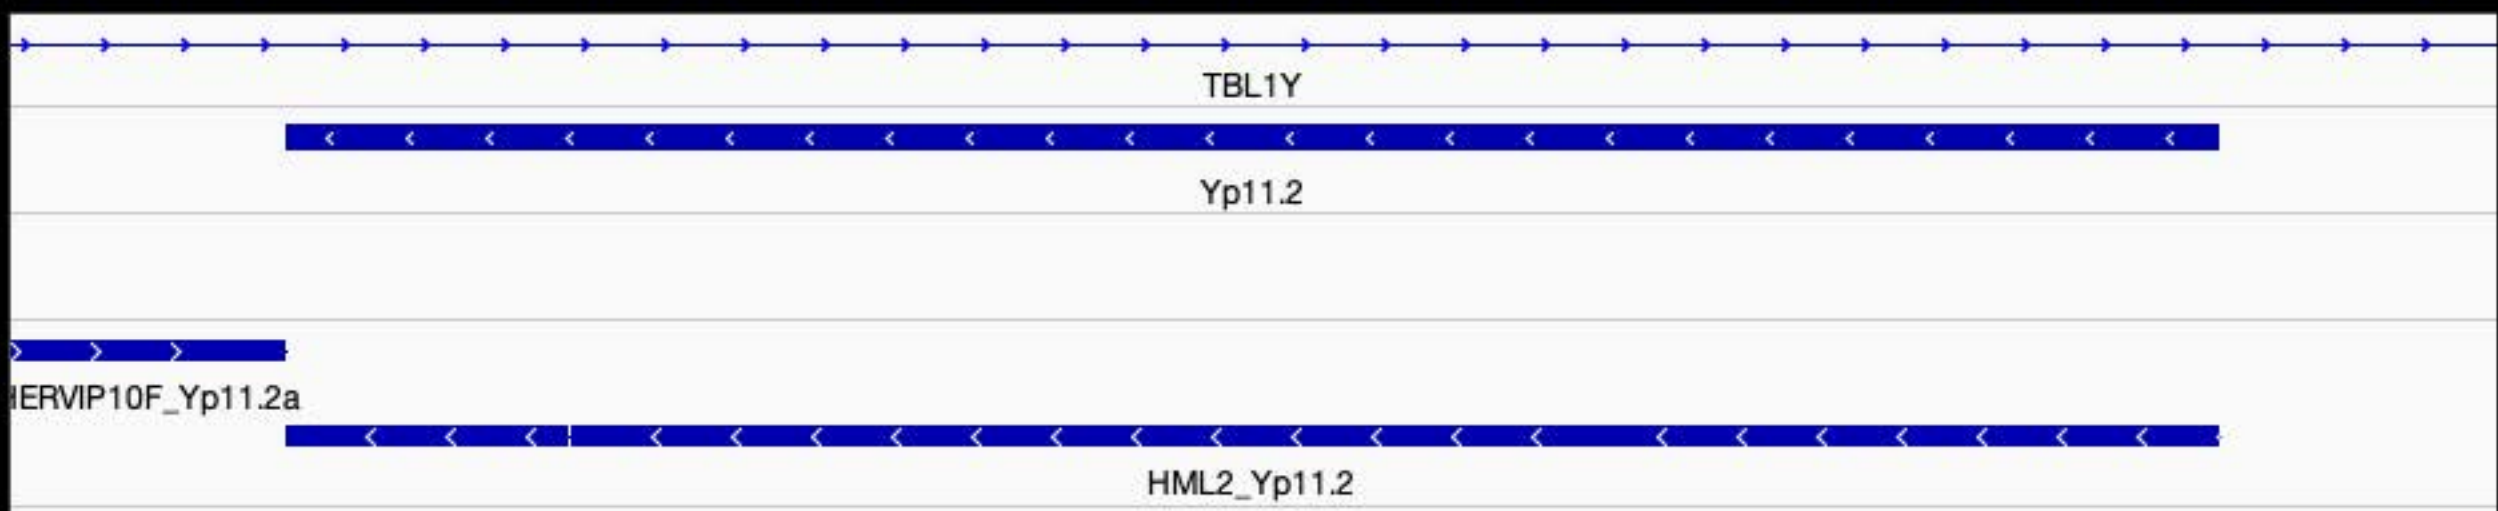

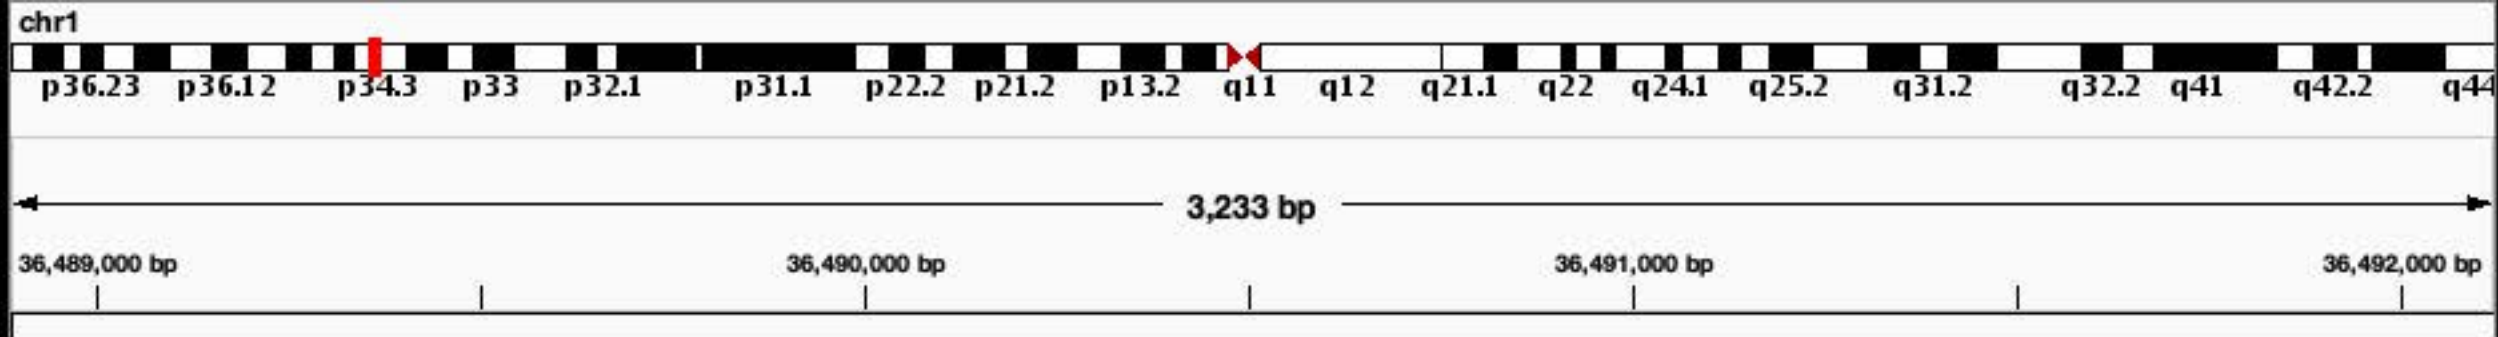

Gene

hg38.subramanianT1.gtf

hg38.subramanianT2.gtf

transcripts.gtf

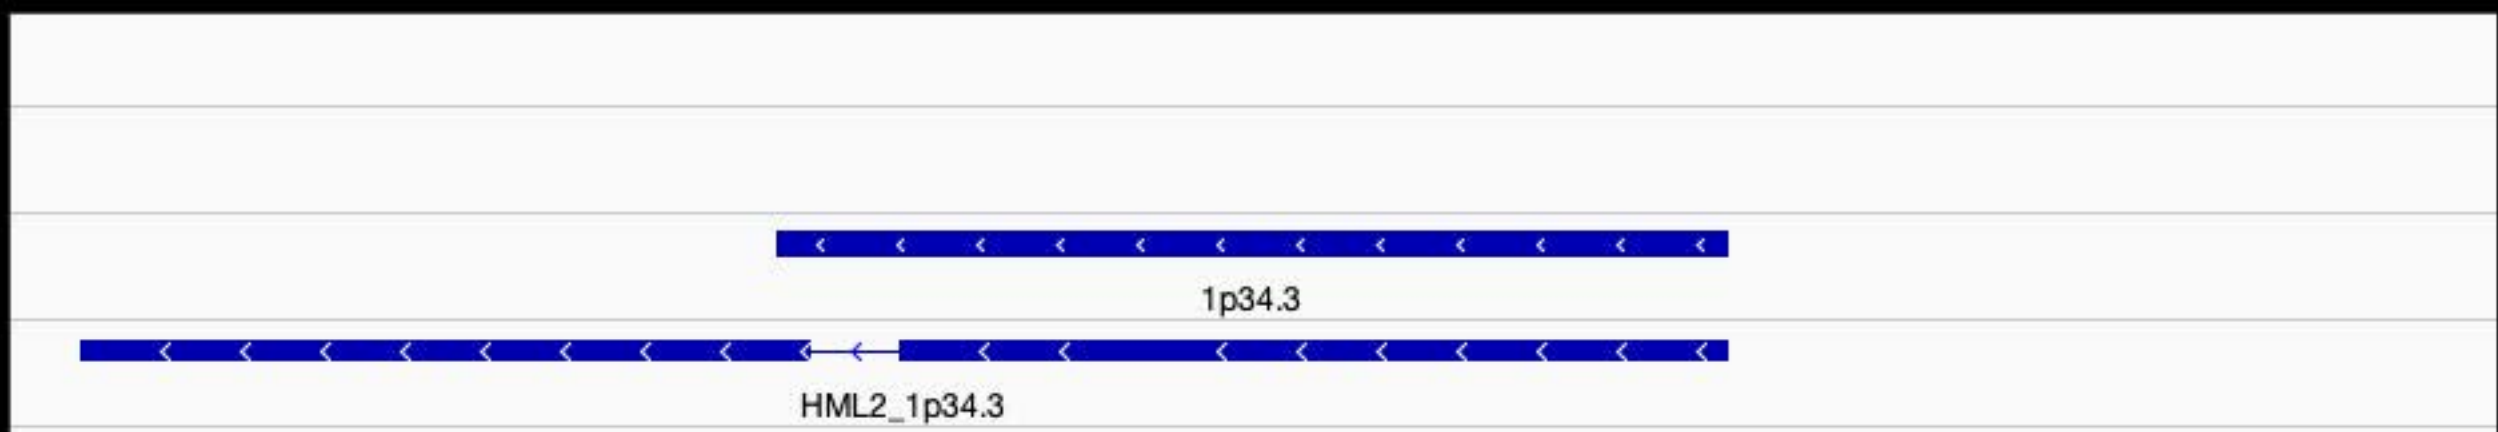

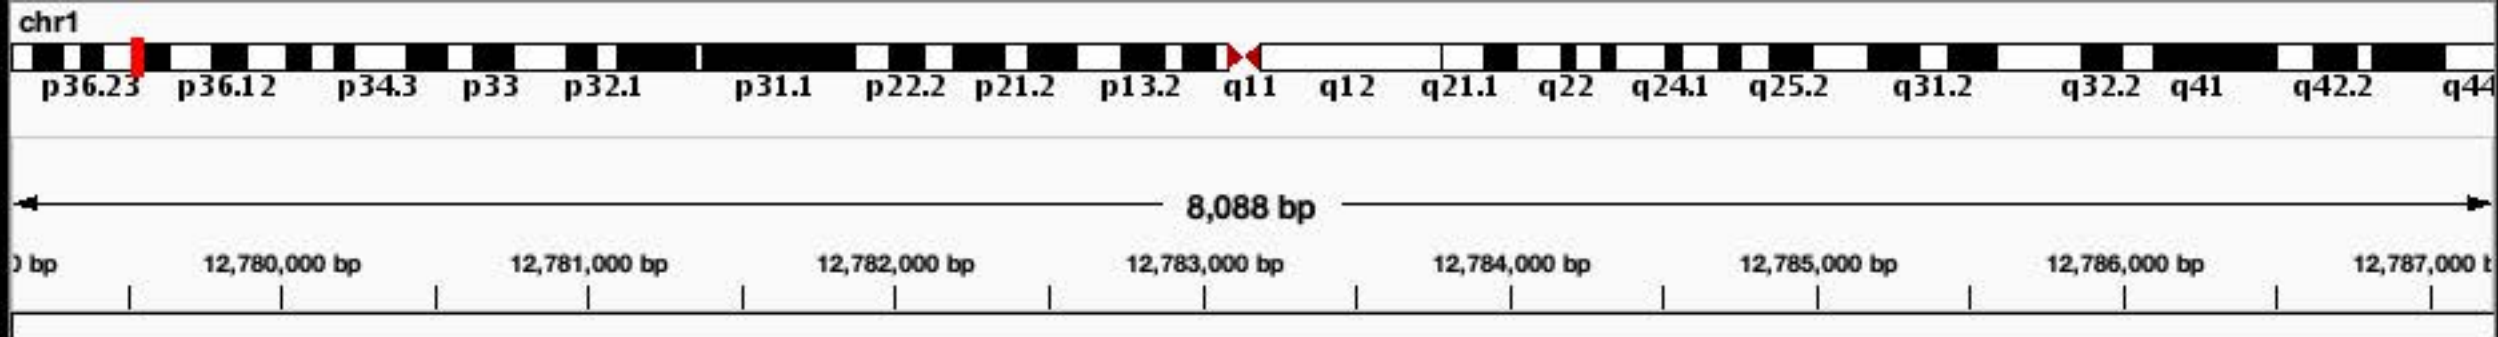

- Gene
- hg38.subramanianT1.gtf
- hg38.subramanianT2.gtf
- transcripts.gtf

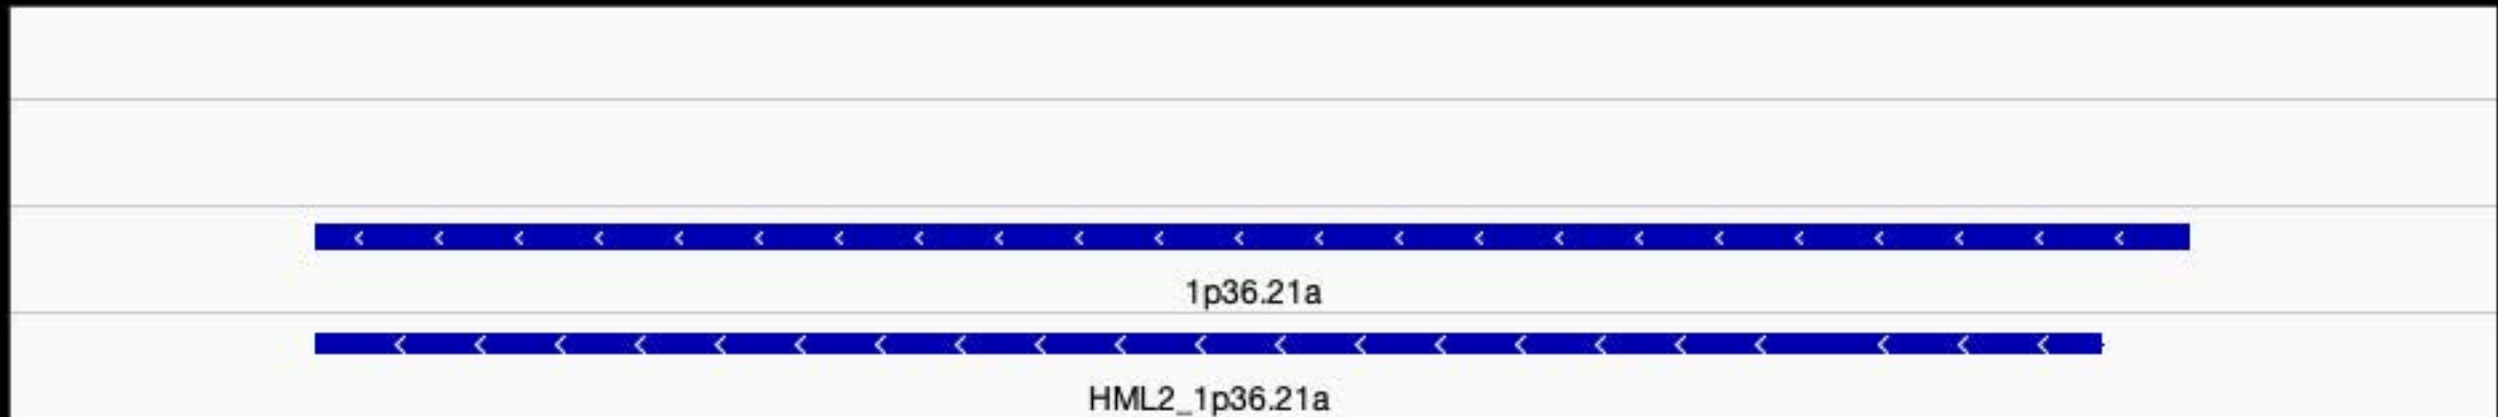

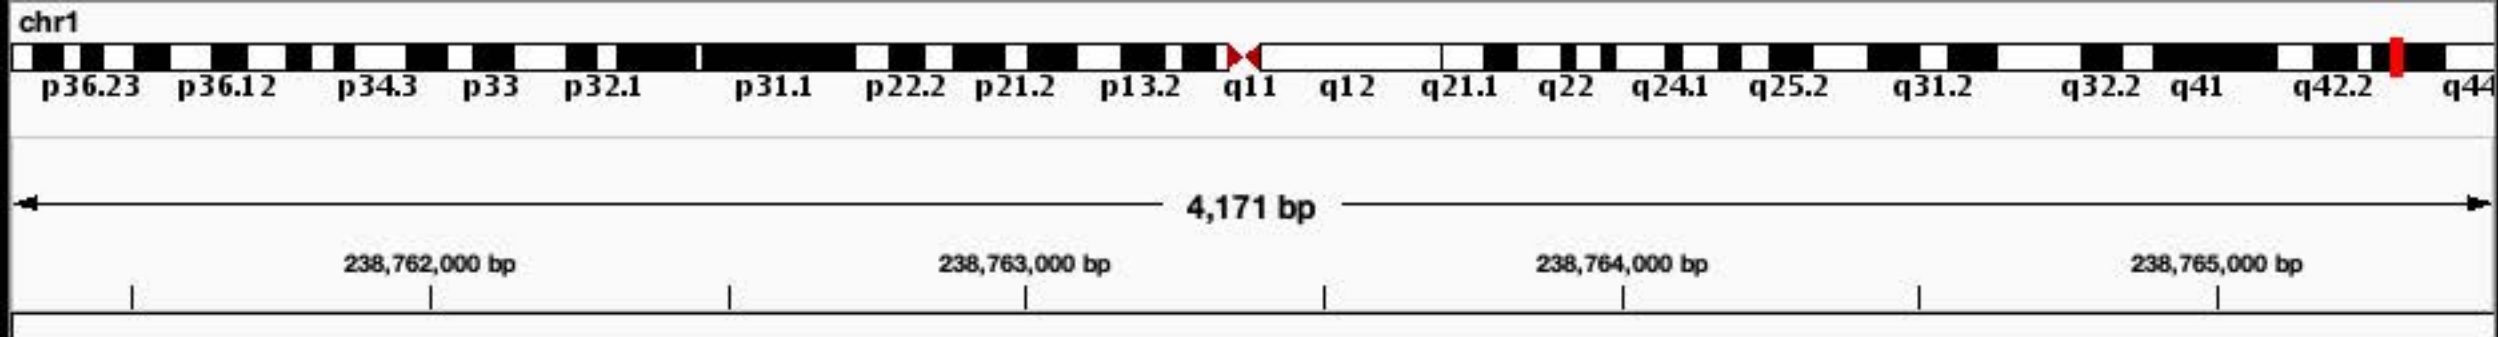

Gene

hg38.subramanianT1.gtf

hg38.subramanianT2.gtf

transcripts.gtf

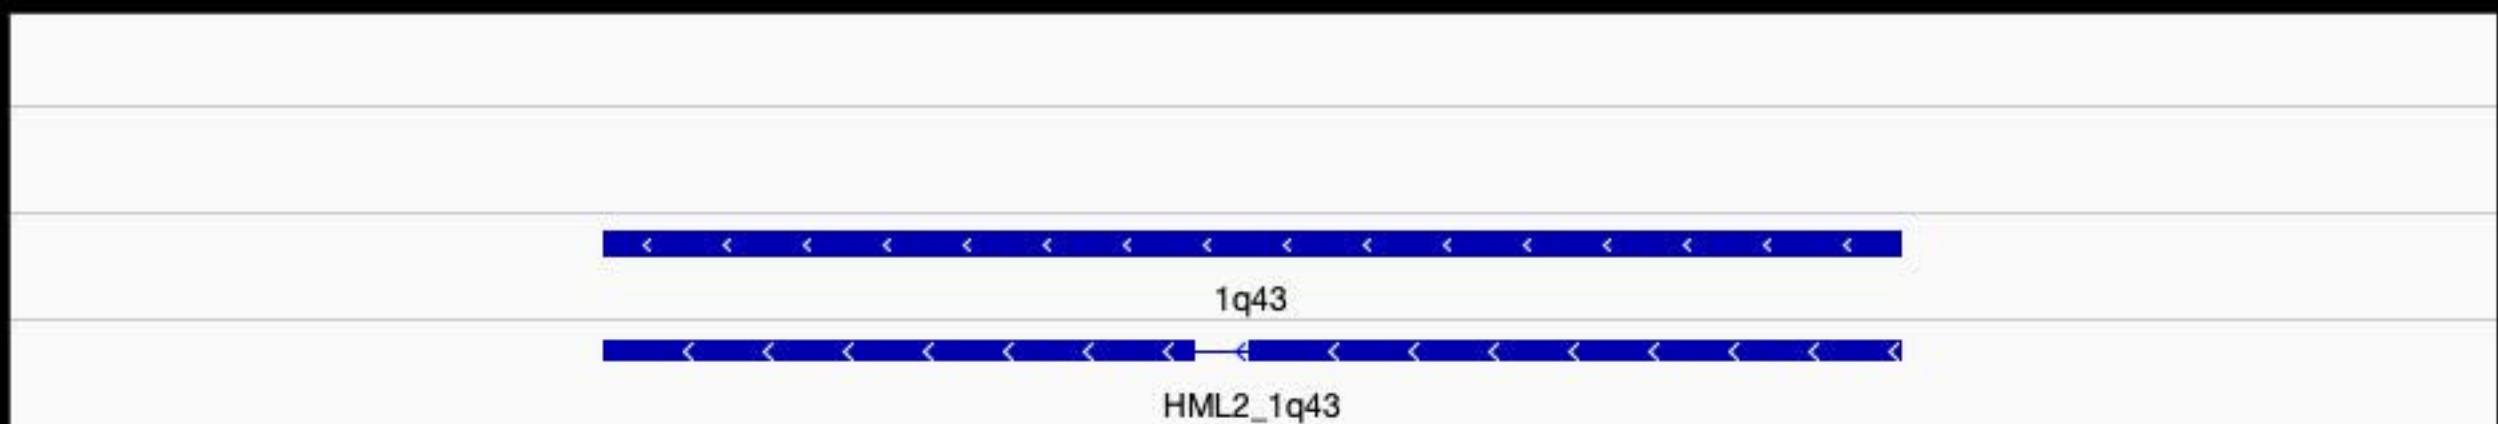

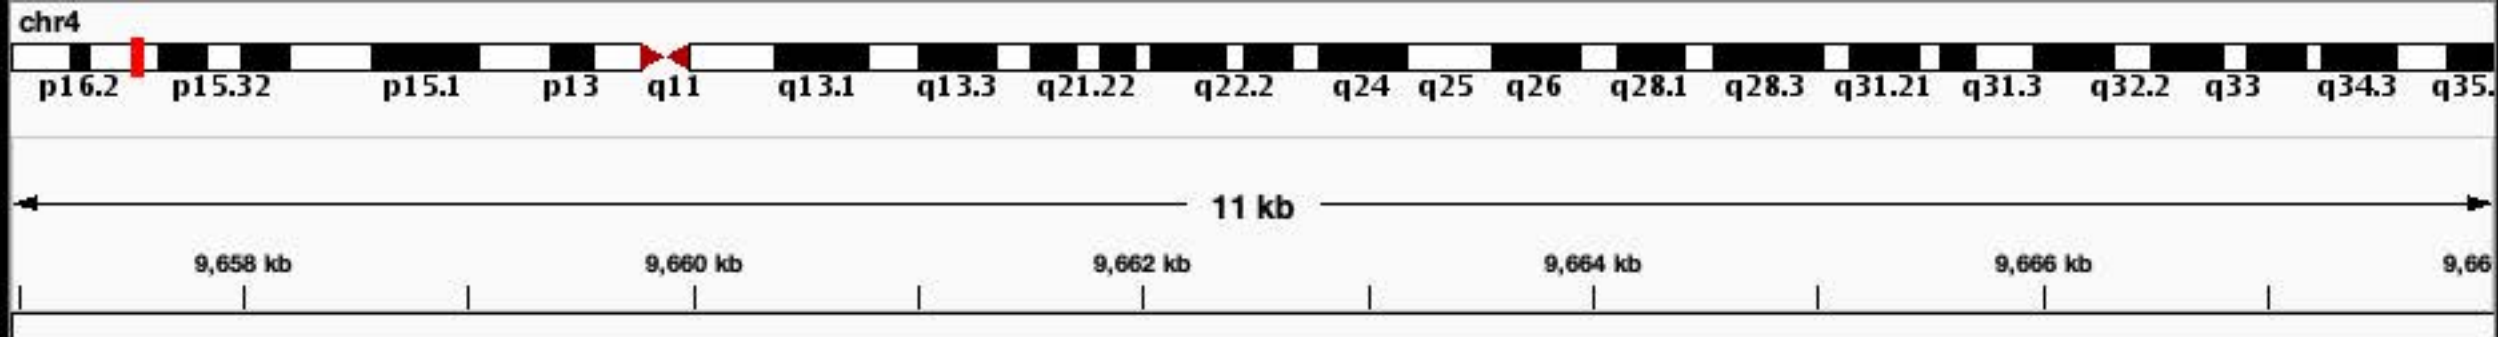

Gene

hg38.subramanianT1.gtf

hg38.subramanianT2.gtf

transcripts.gtf

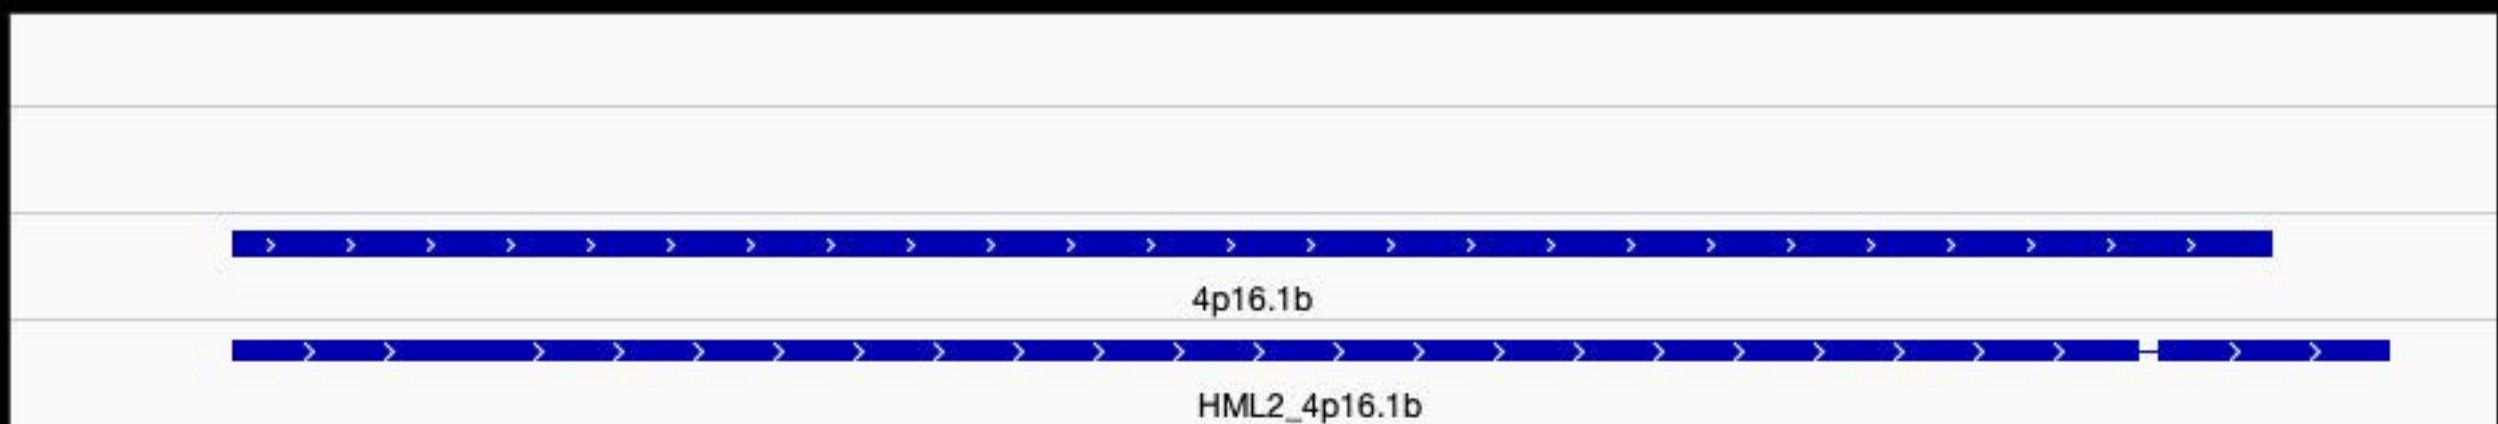

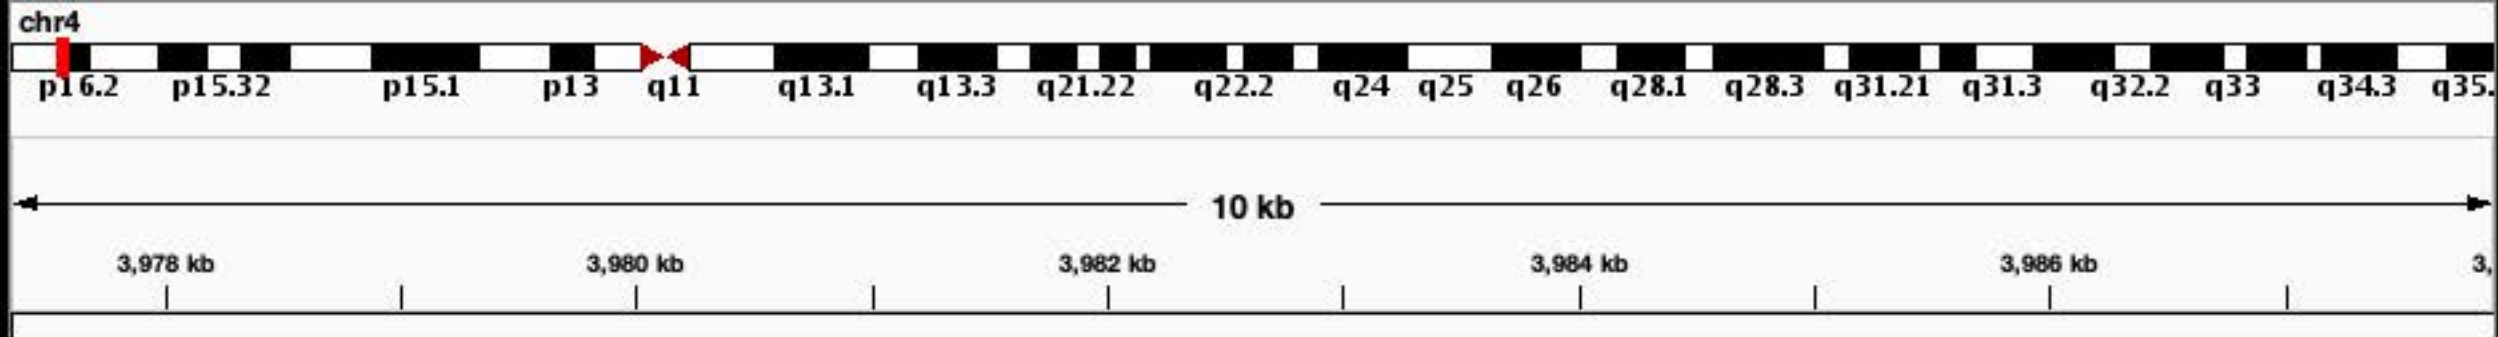

Gene

hg38.subramanianT1.gtf

hg38.subramanianT2.gtf

transcripts.gtf

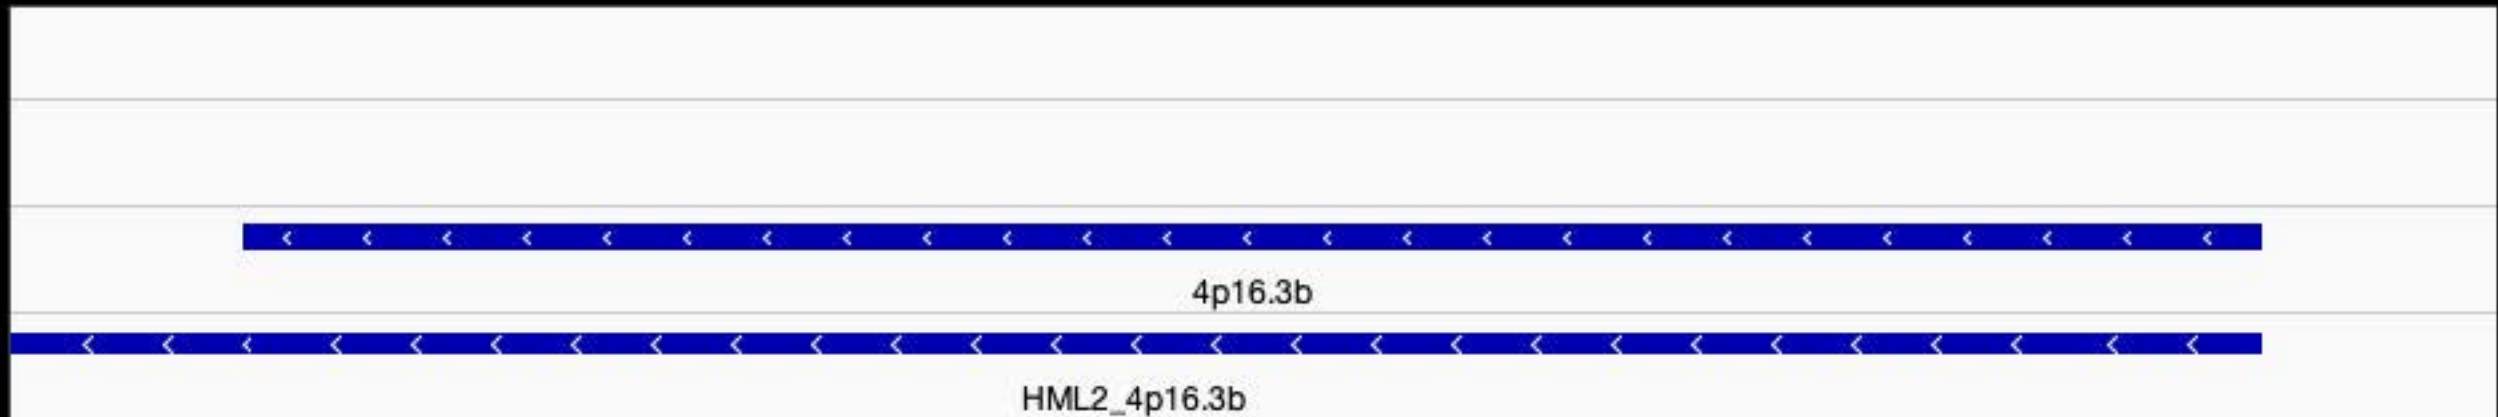

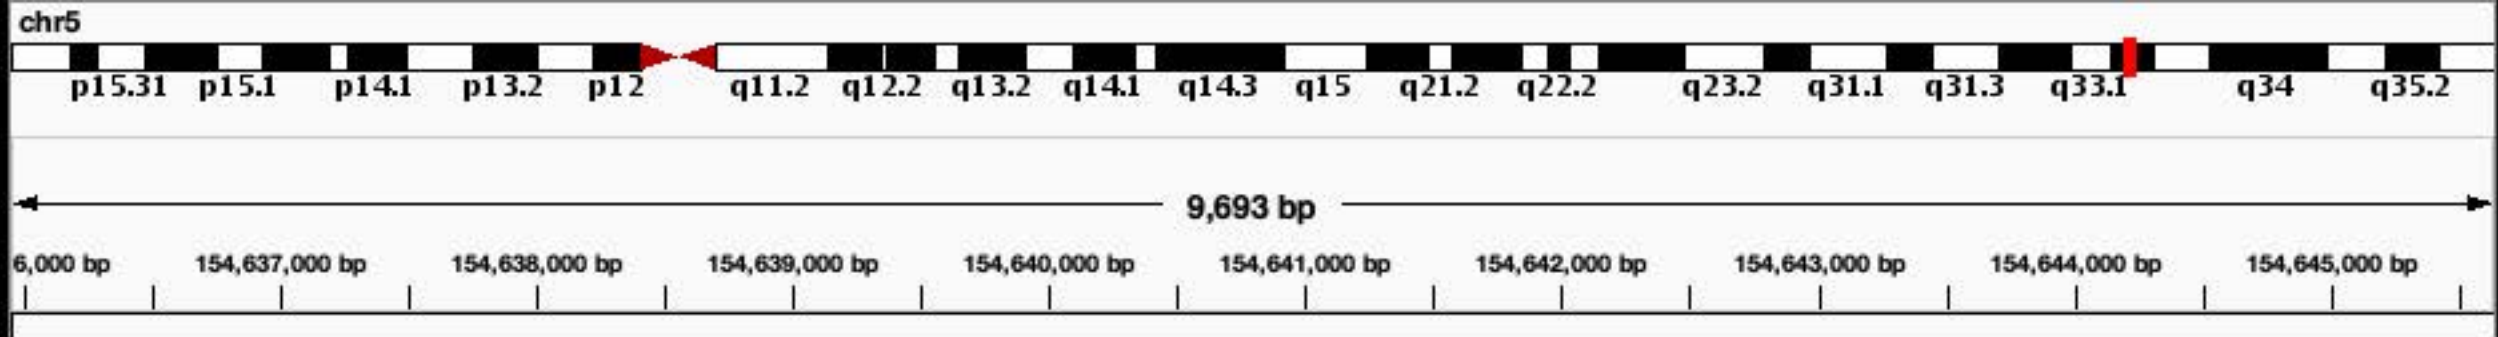

Gene

hg38.subramanianT1.gtf

hg38.subramanianT2.gtf

transcripts.gtf

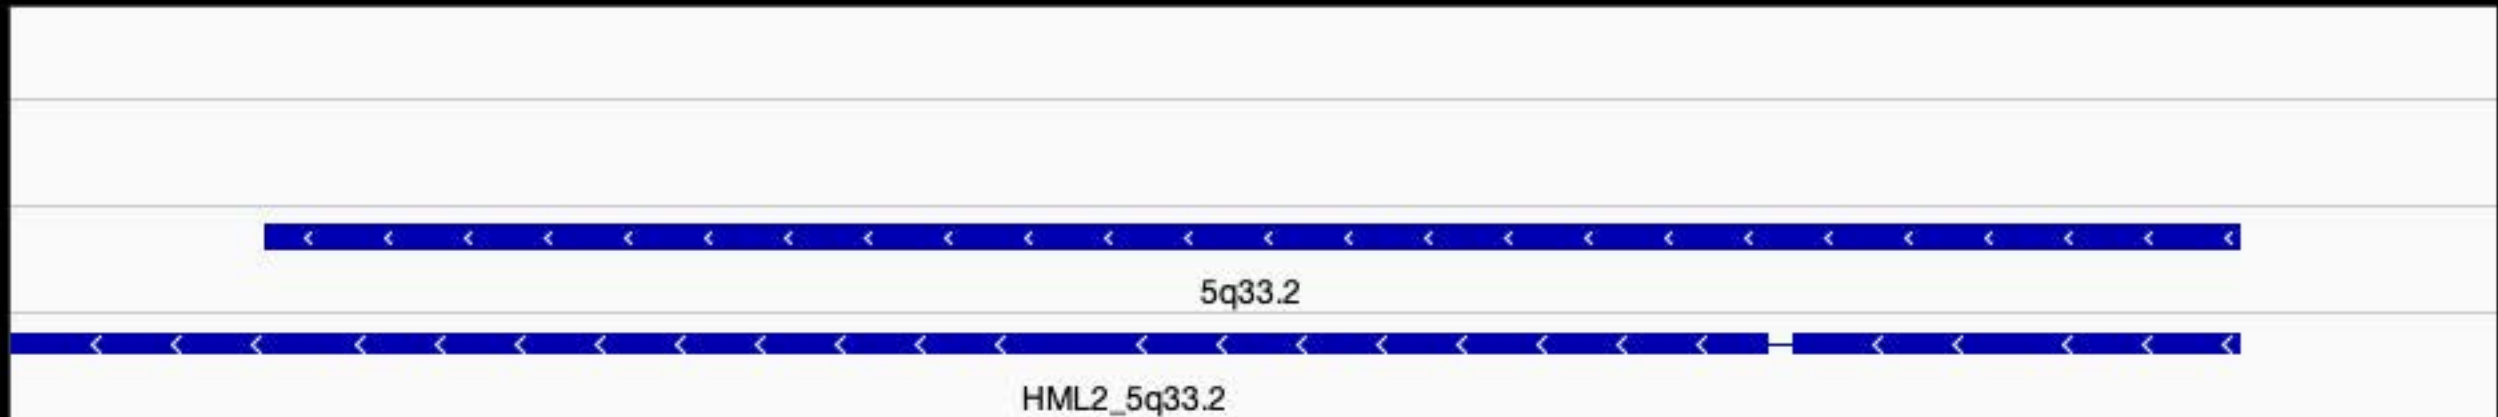

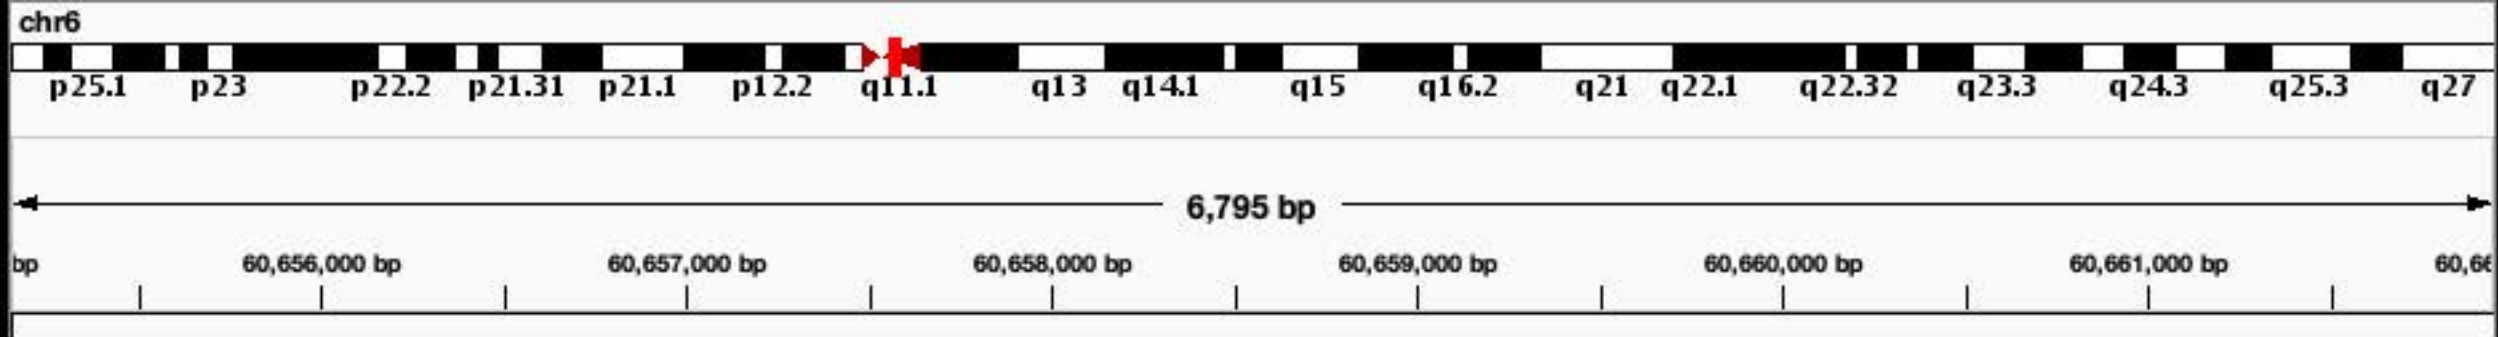

Gene

hg38.subramanianT1.gtf

hg38.subramanianT2.gtf

transcripts.gtf

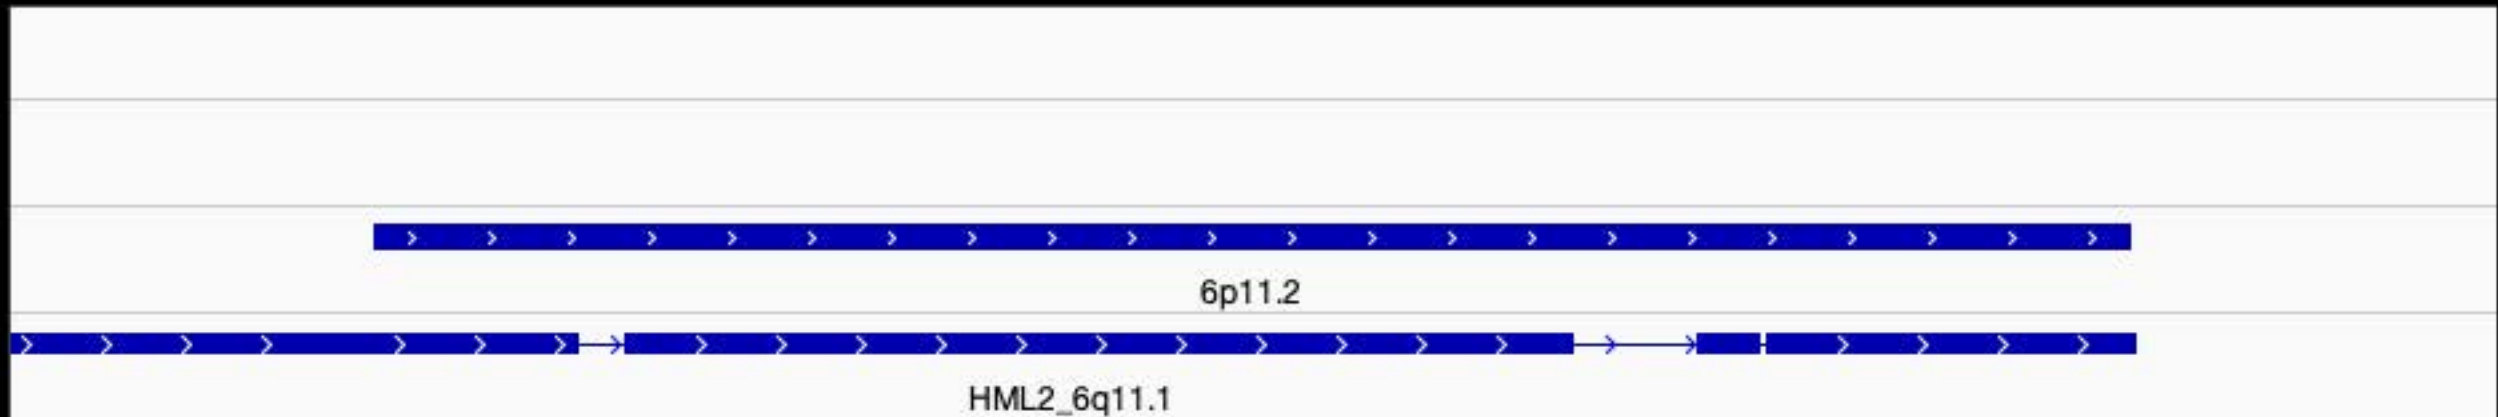



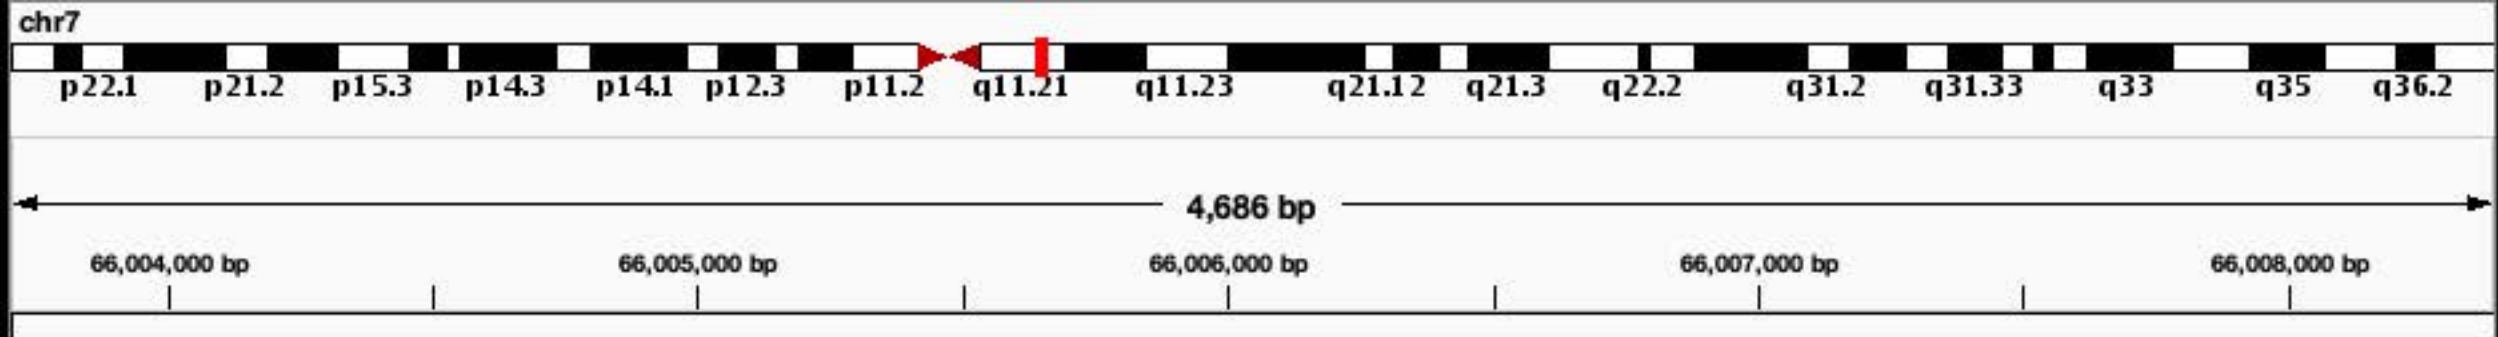

Gene

hg38.subramanianT1.gtf

hg38.subramanianT2.gtf

transcripts.gtf

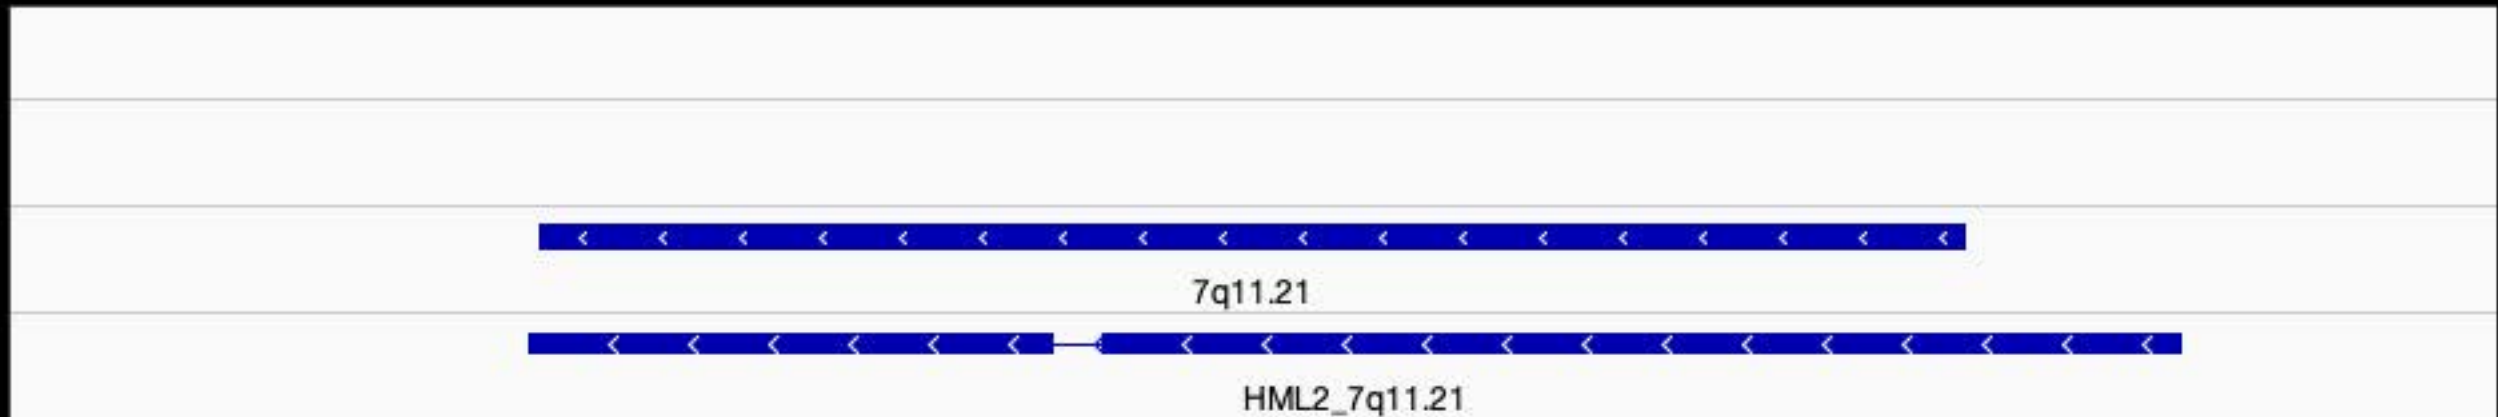

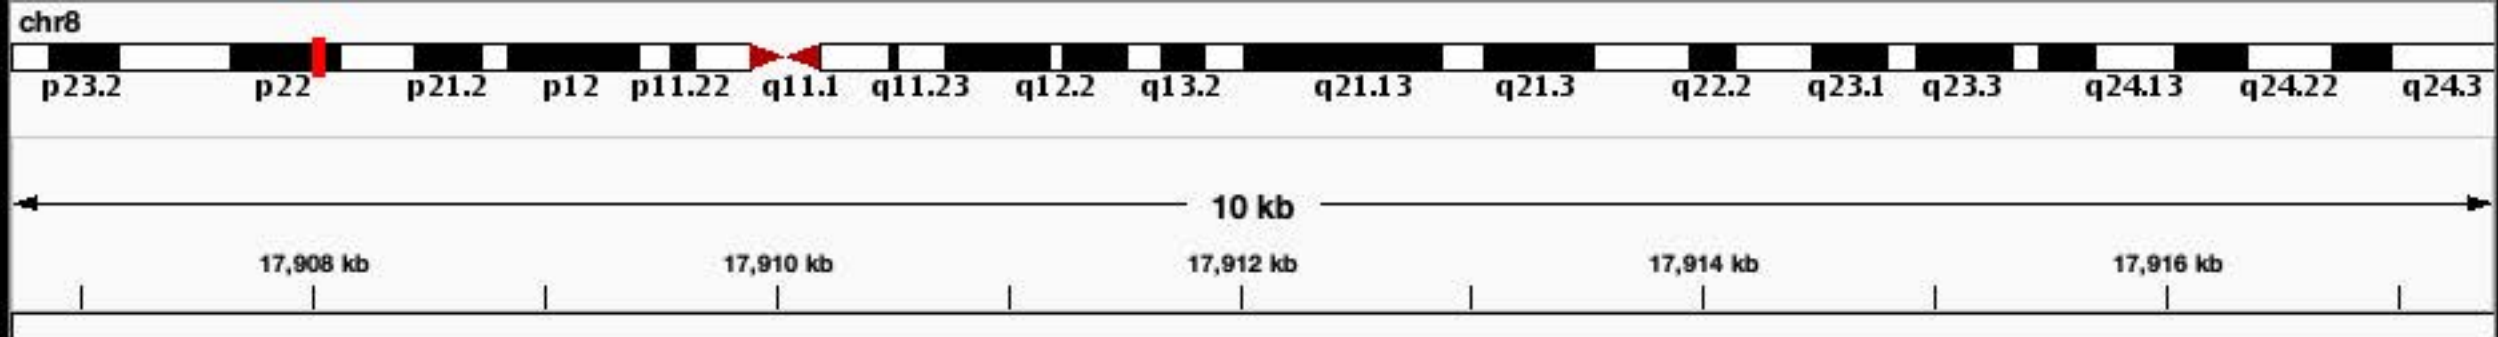

Gene

hg38.subramanianT1.gtf

hg38.subramanianT2.gtf

transcripts.gtf

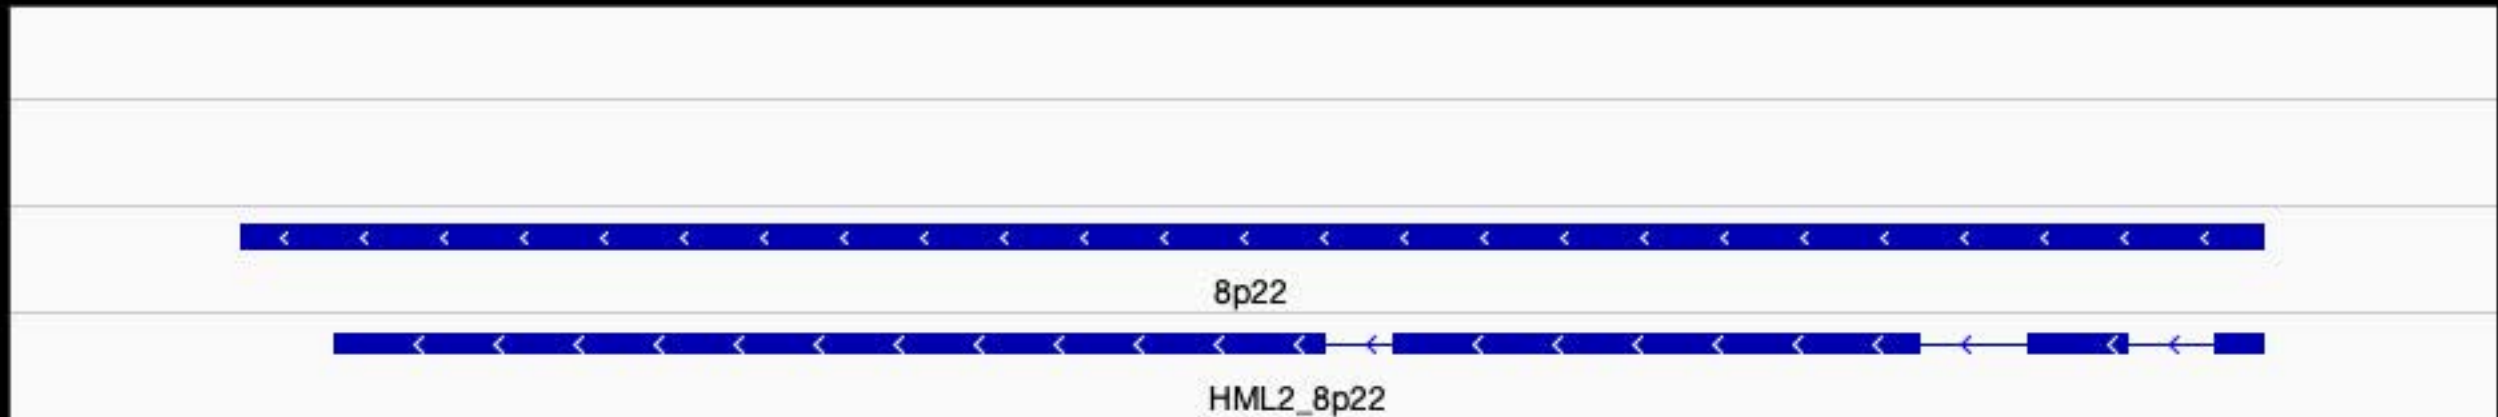

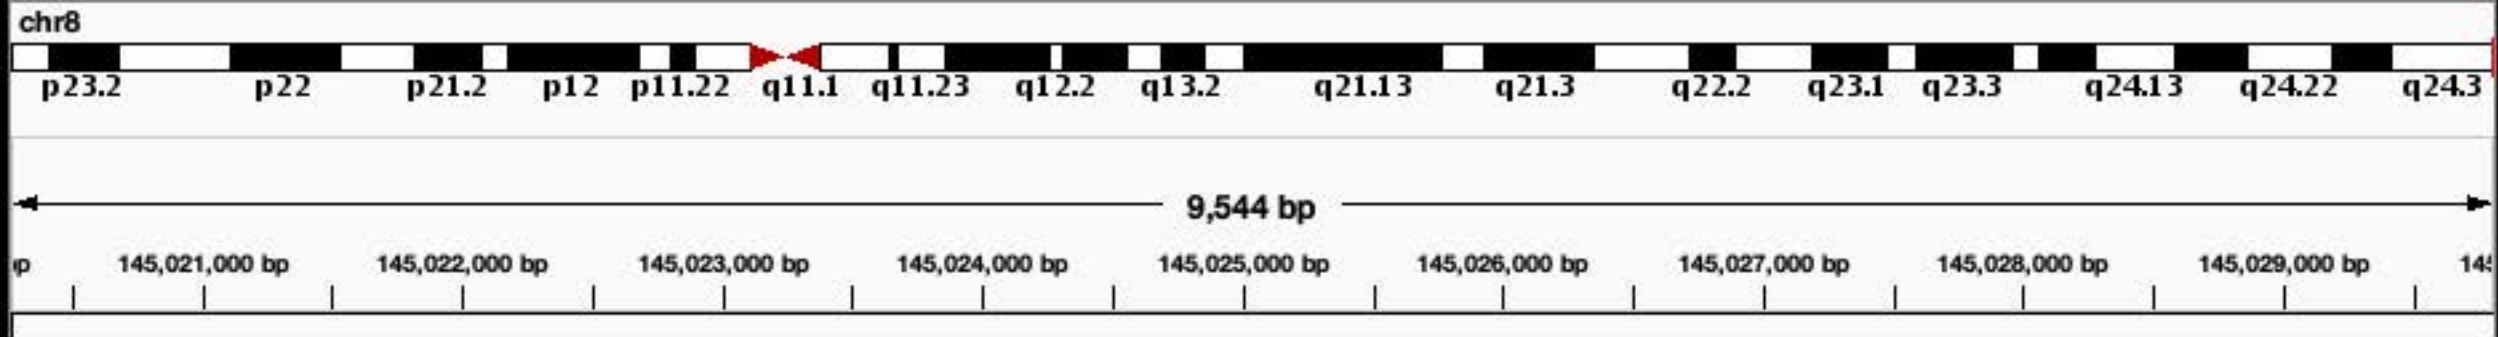

Gene

hg38.subramanianT1.gtf

hg38.subramanianT2.gtf

transcripts.gtf

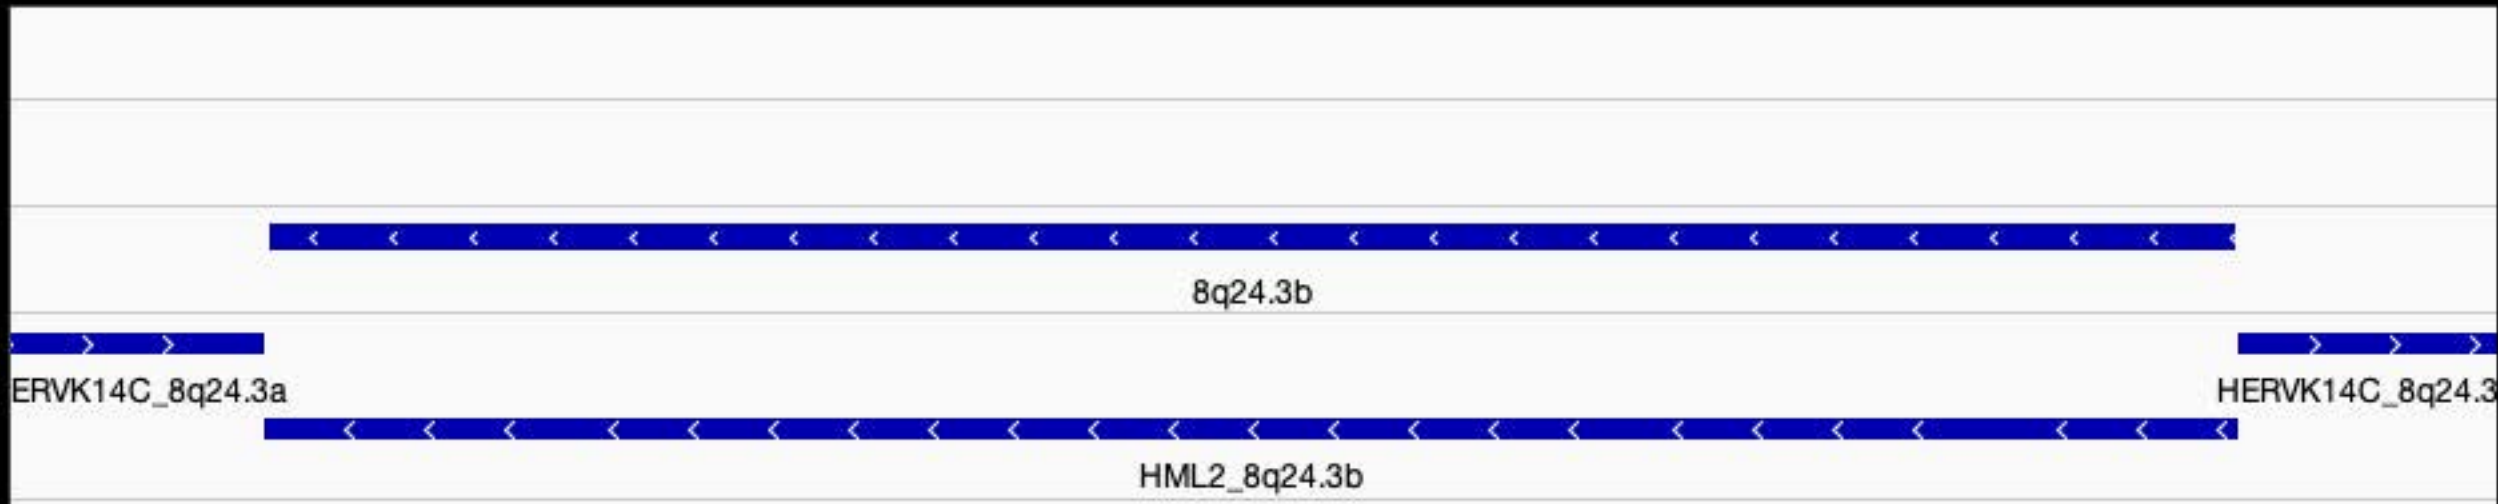

chr12

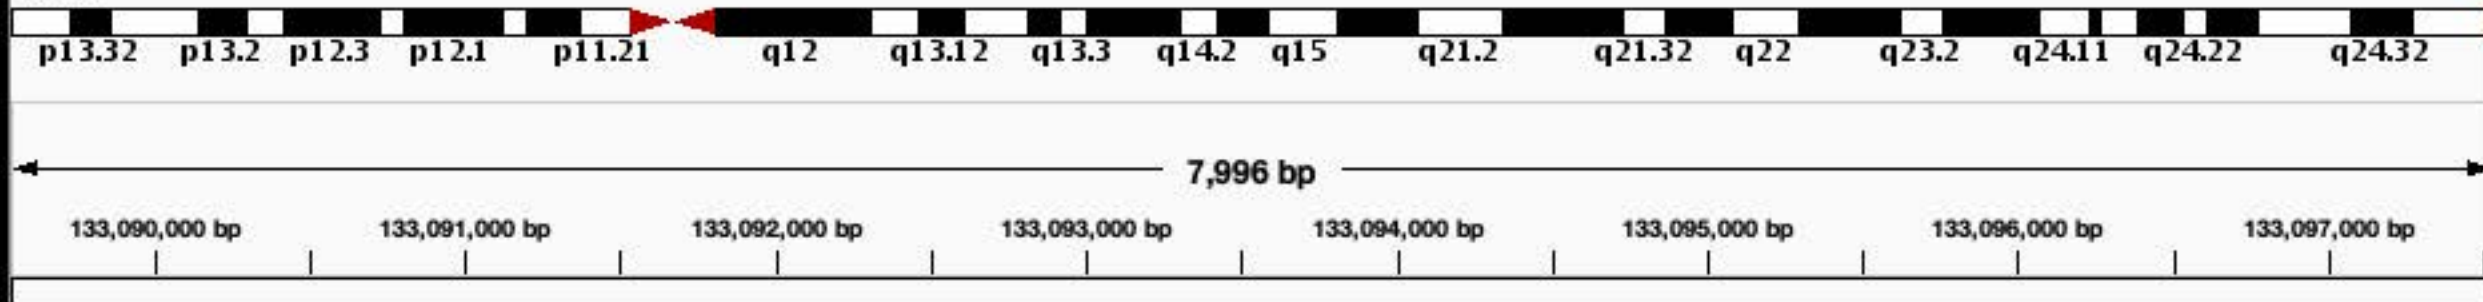

Gene  
hg38.subramanianT1.gtf  
hg38.subramanianT2.gtf  
transcripts.gtf

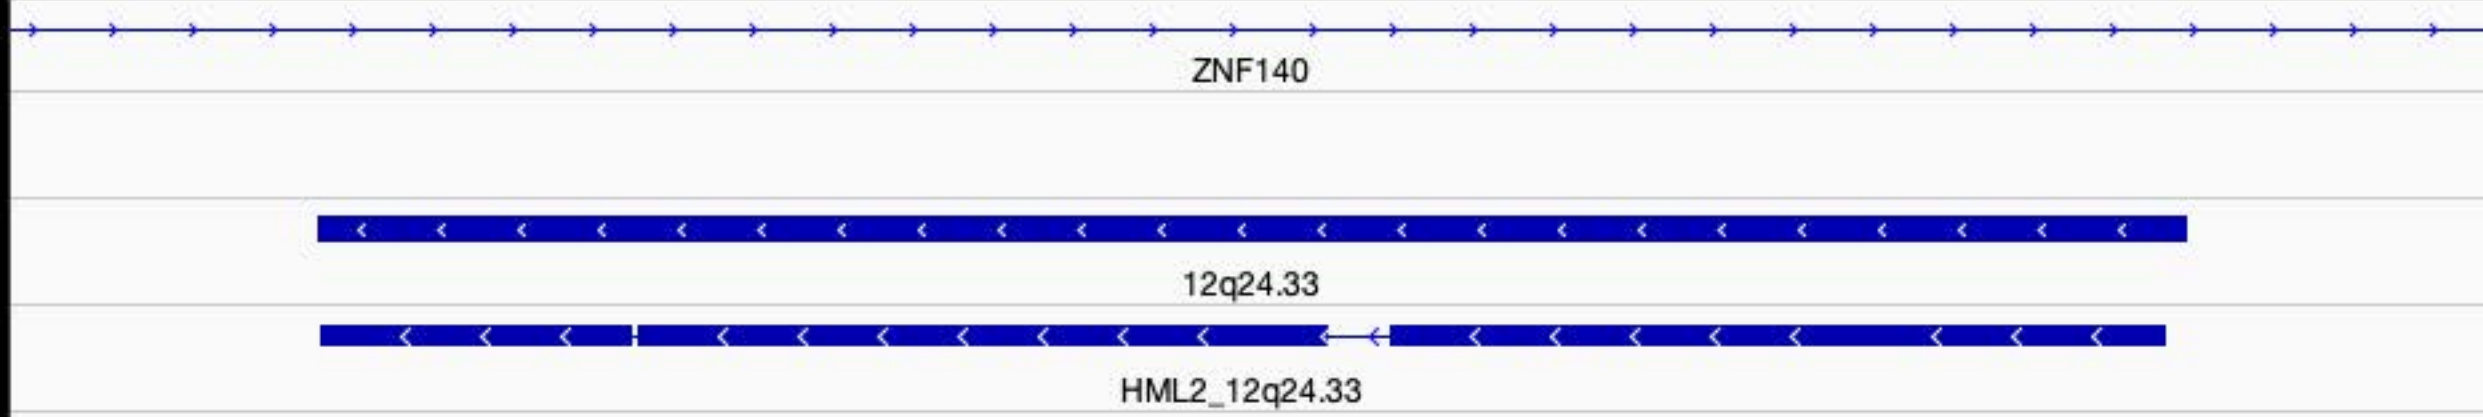

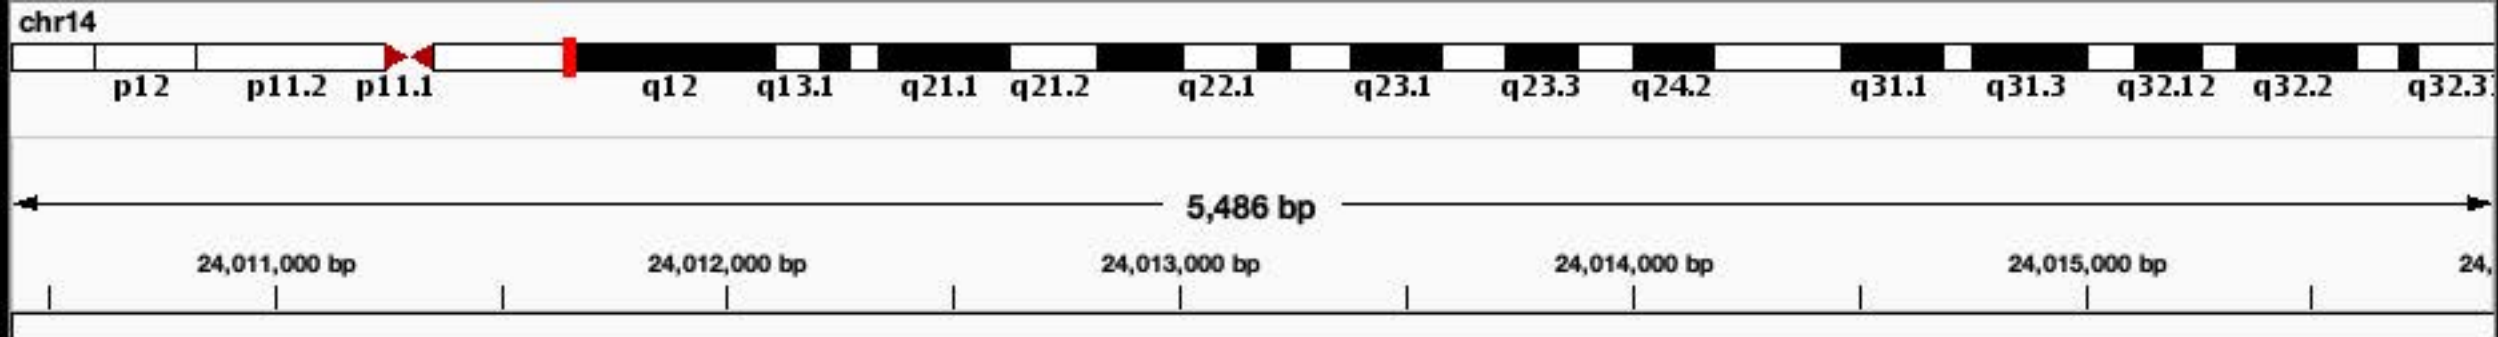

Gene

hg38.subramanianT1.gtf

hg38.subramanianT2.gtf

transcripts.gtf

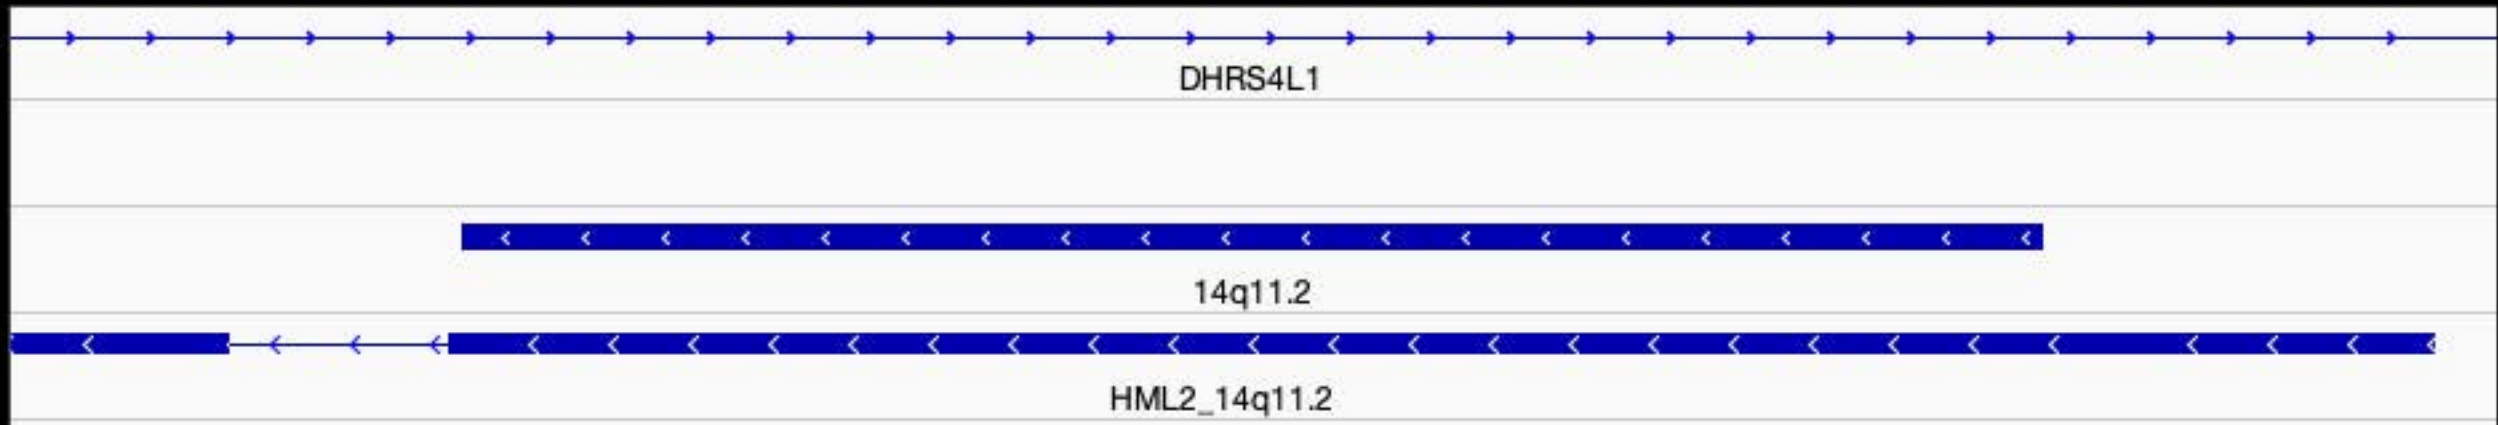



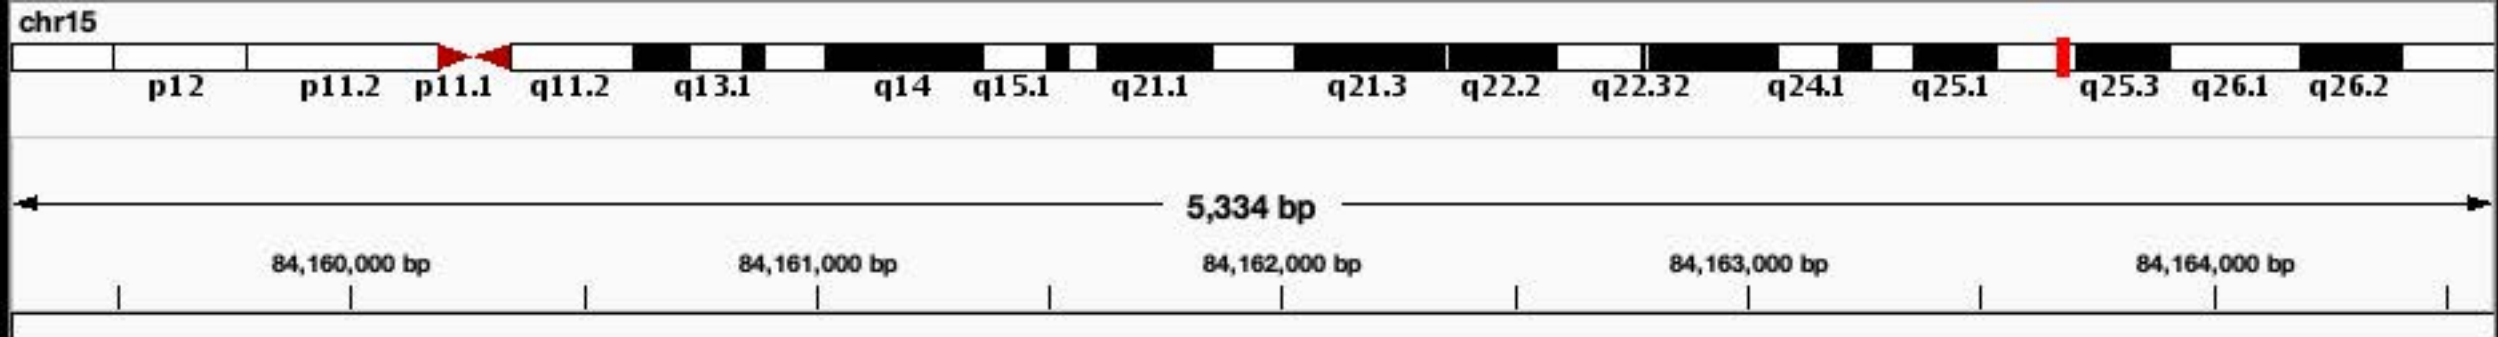

Gene

hg38.subramanianT1.gtf

hg38.subramanianT2.gtf

transcripts.gtf

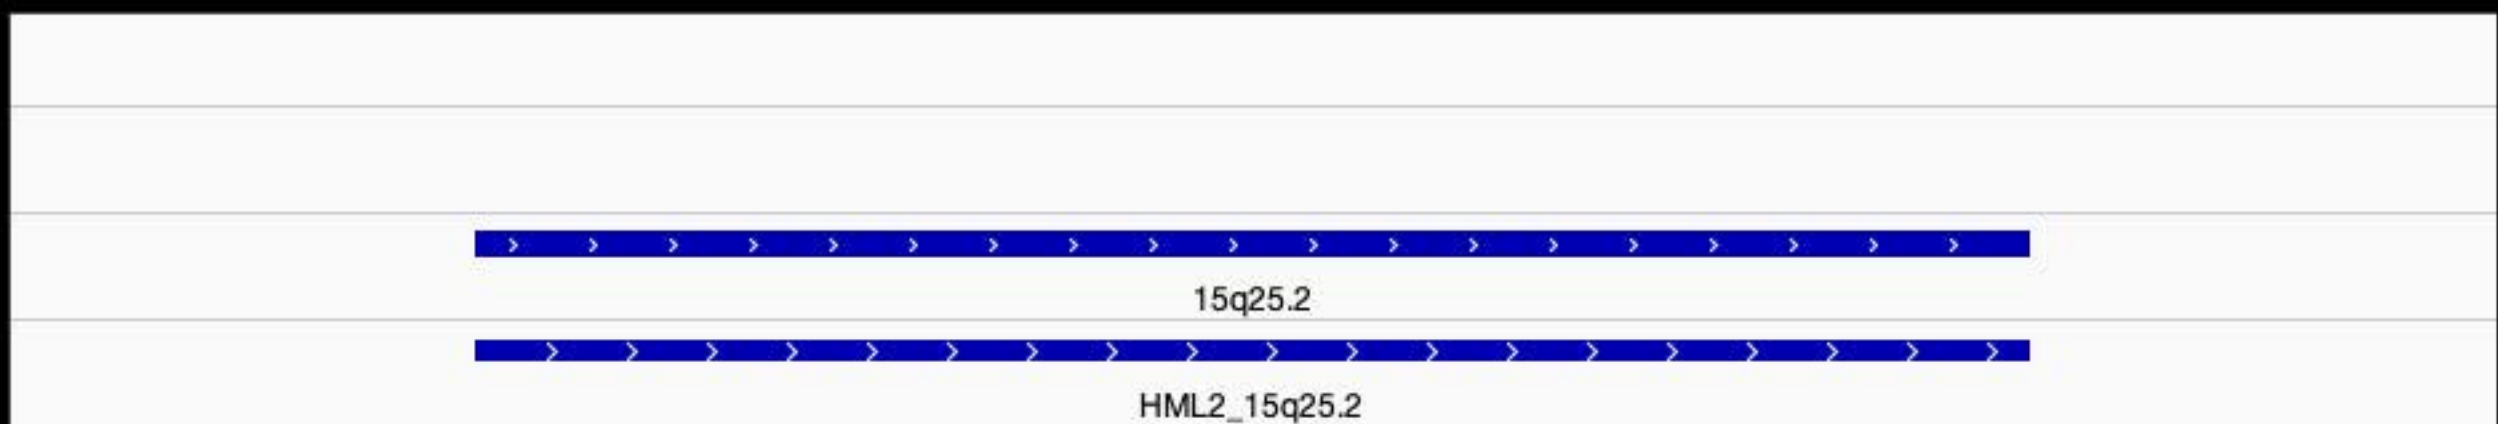

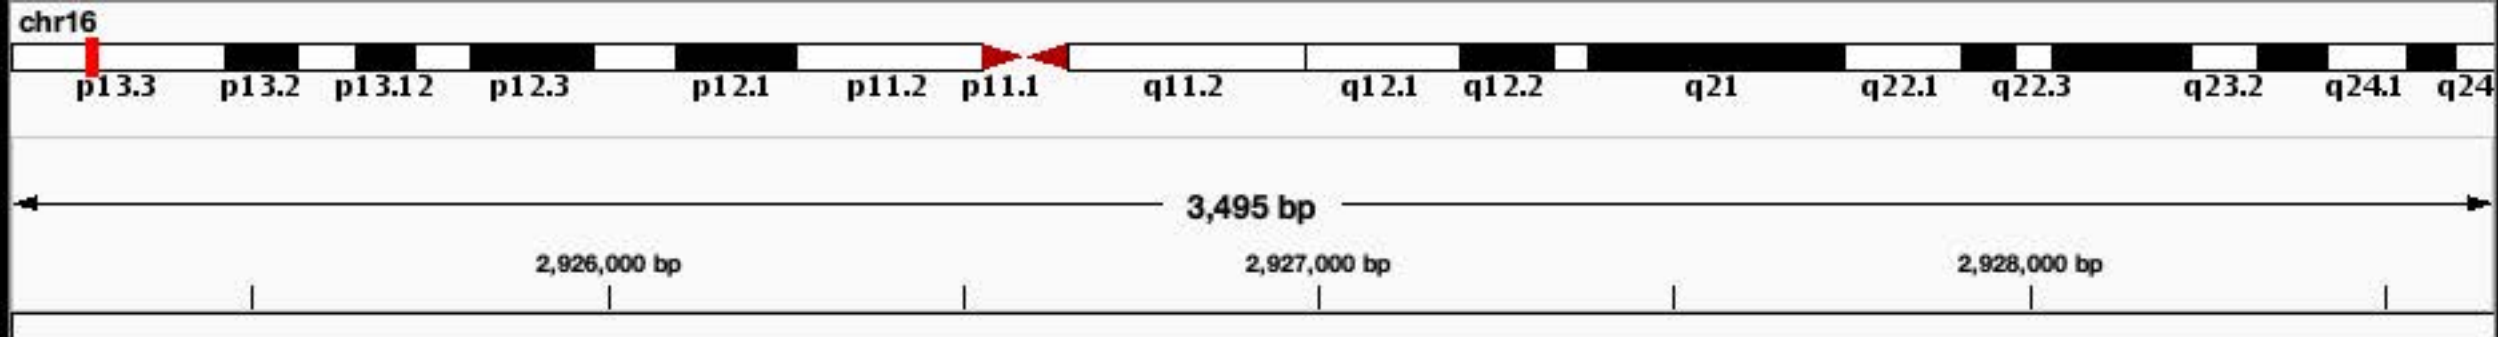

Gene

hg38.subramanianT1.gtf

hg38.subramanianT2.gtf

transcripts.gtf

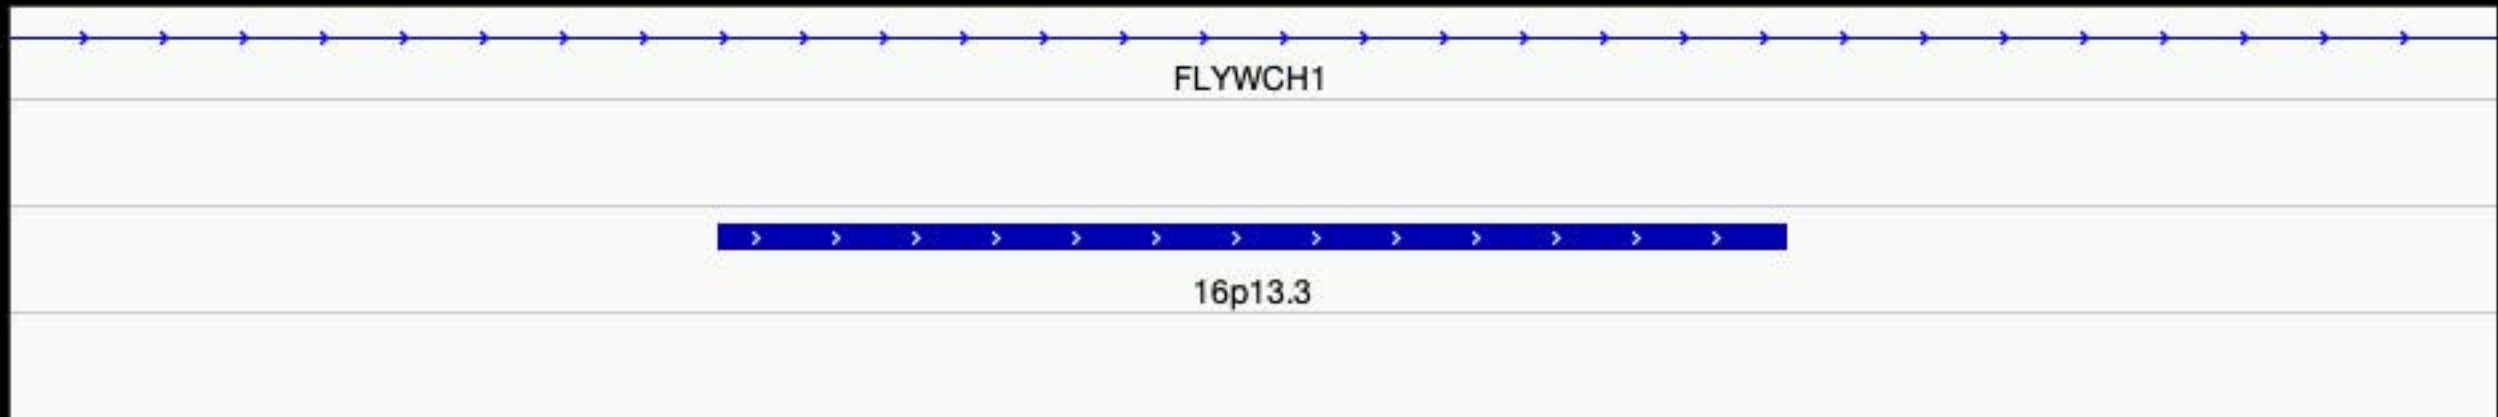



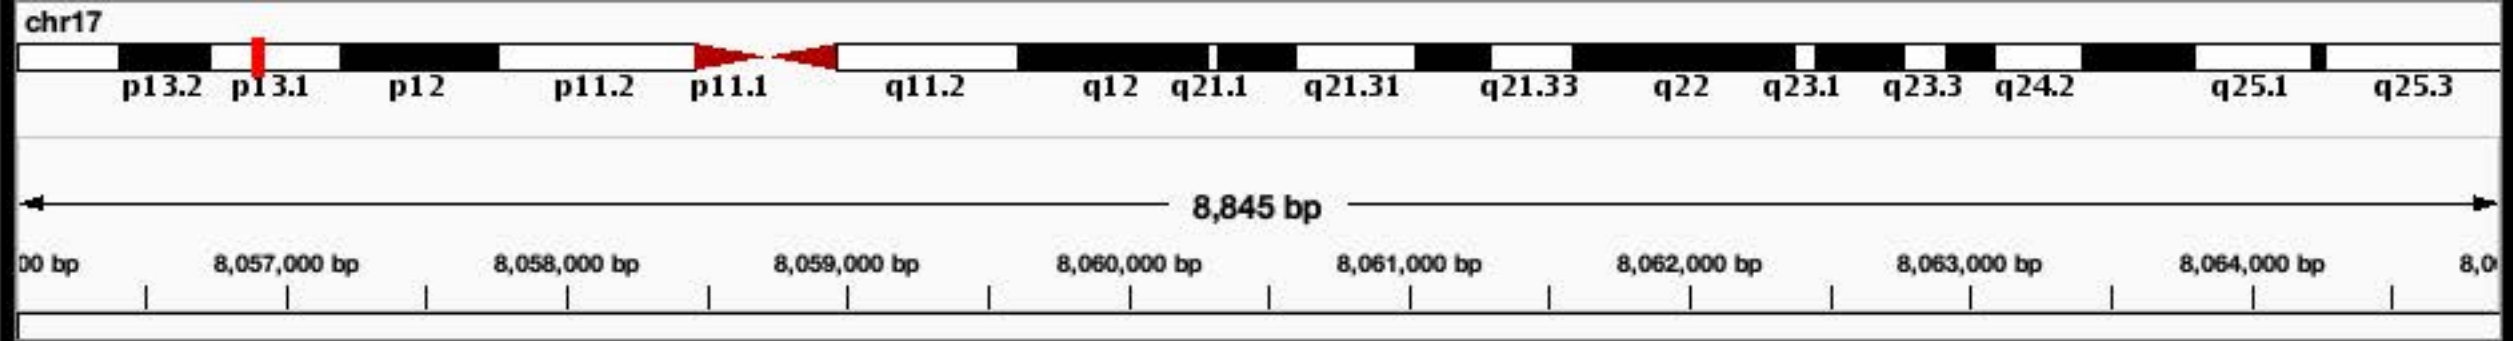

Gene

hg38.subramanianT1.gtf

hg38.subramanianT2.gtf

transcripts.gtf

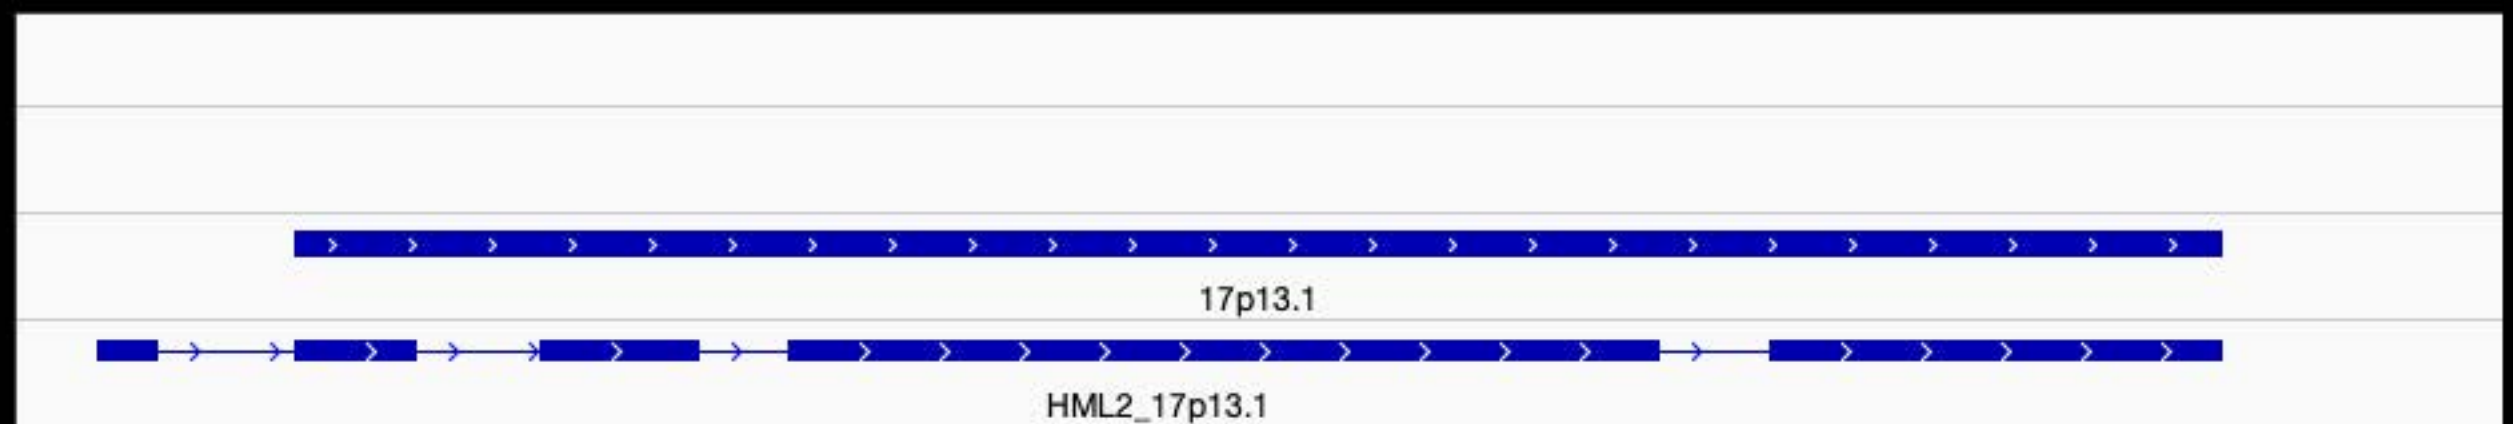

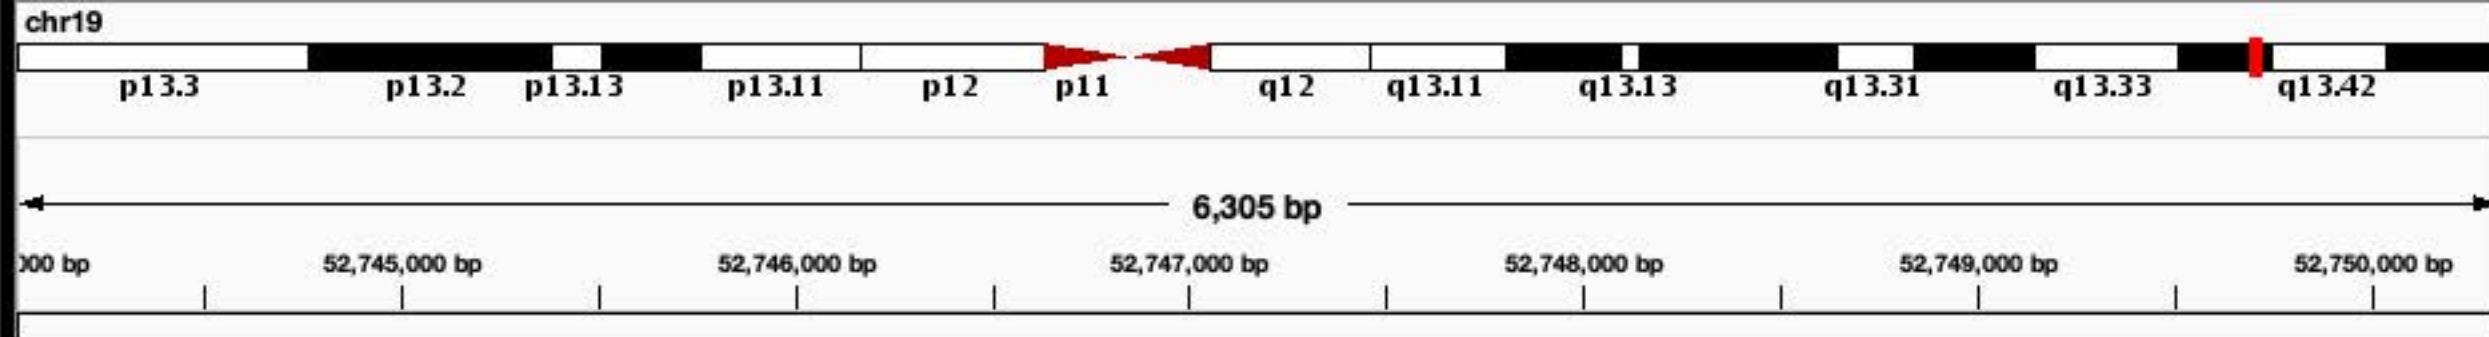

Gene

hg38.subramanianT1.gtf

hg38.subramanianT2.gtf

transcripts.gtf

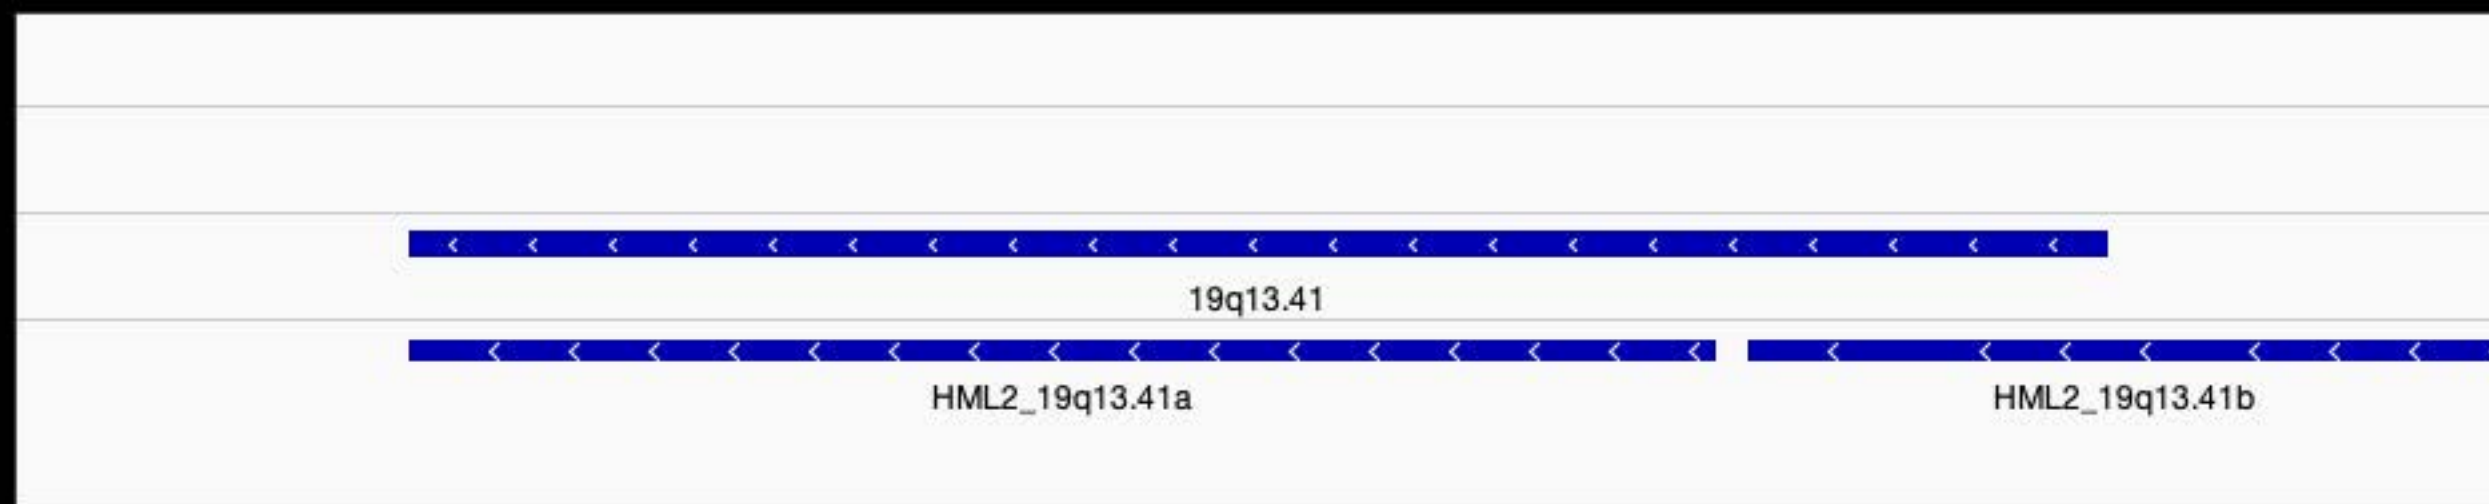

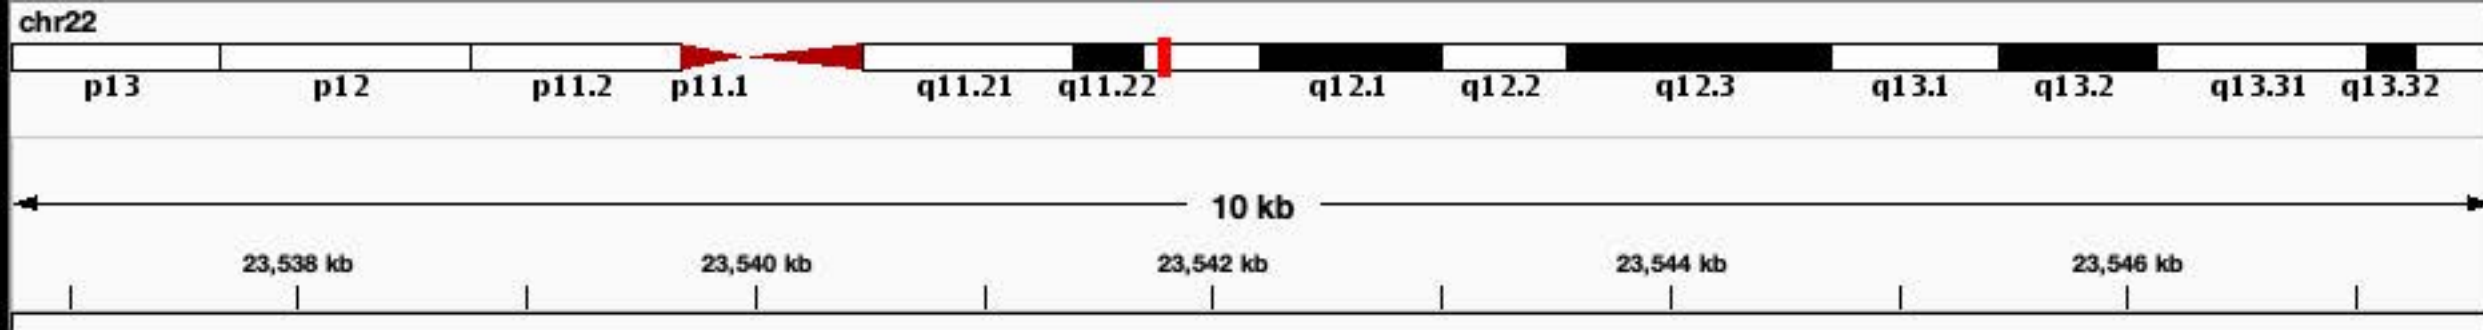

Gene

hg38.subramanianT1.gtf

hg38.subramanianT2.gtf

transcripts.gtf

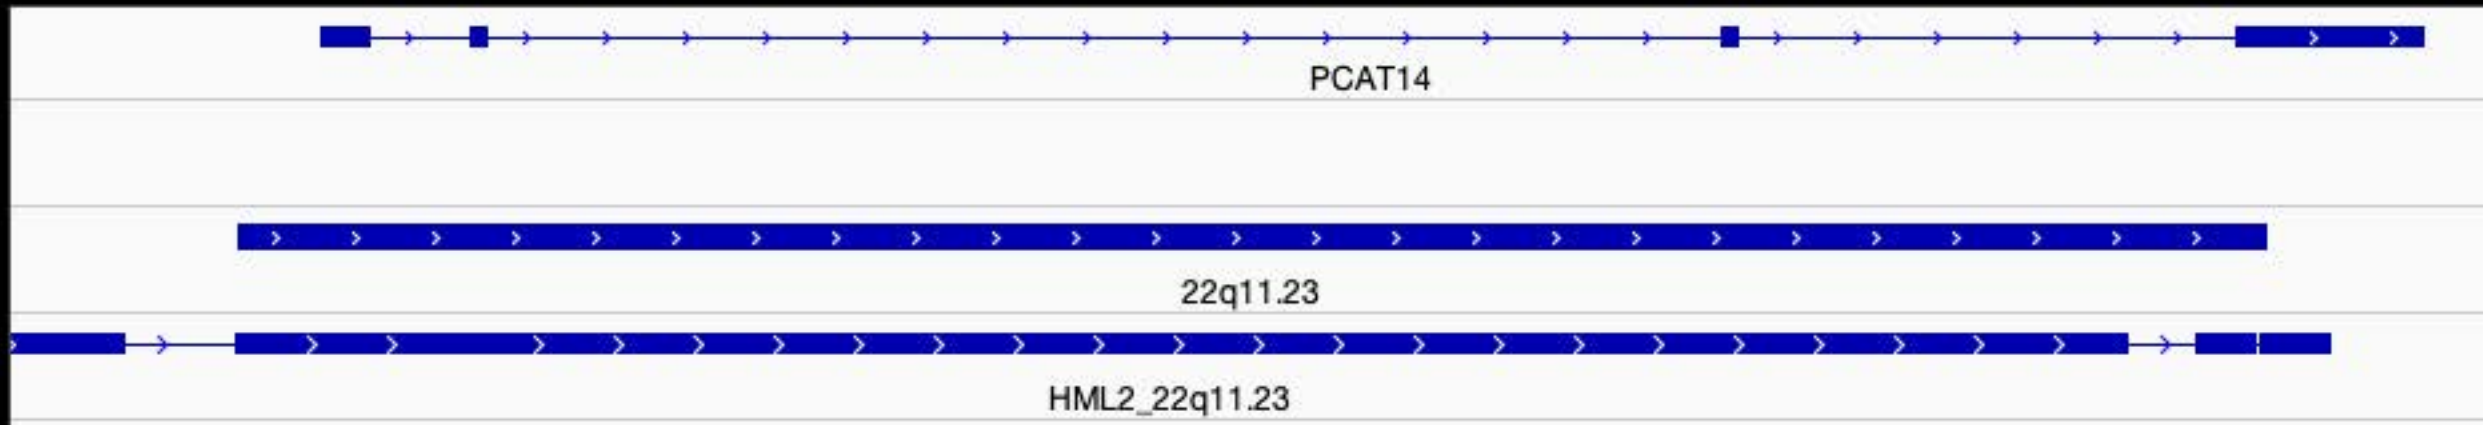

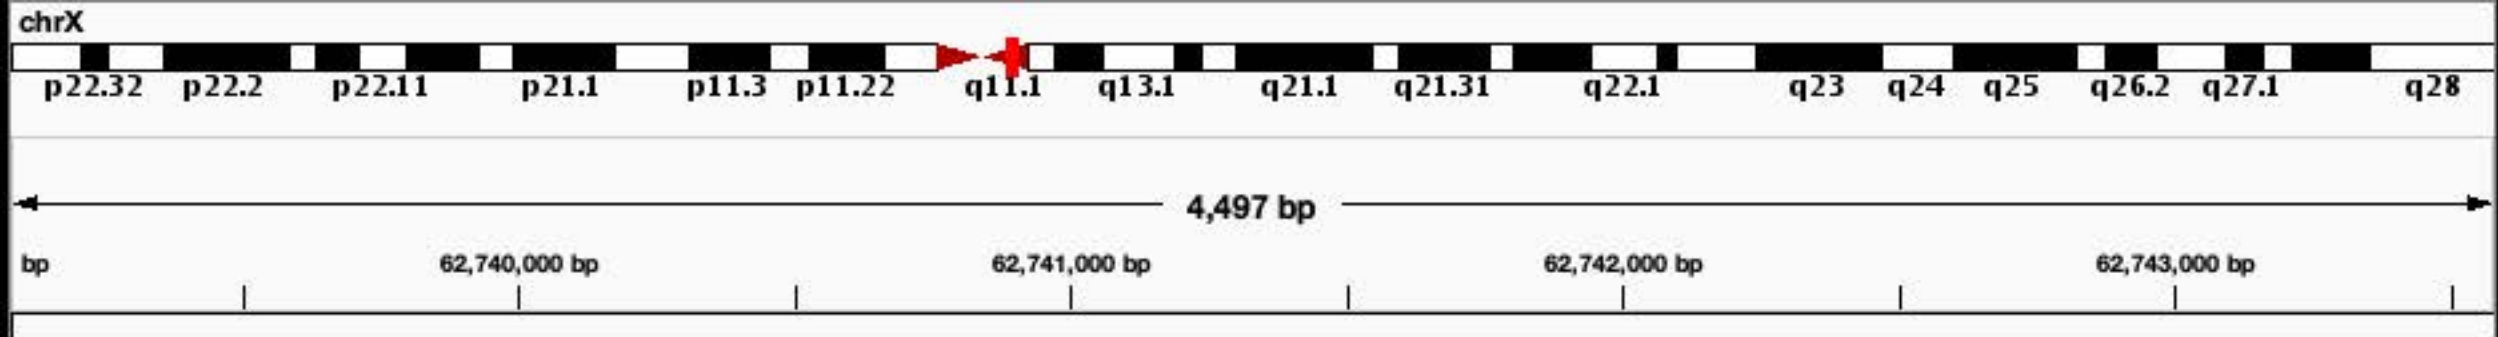

Gene

hg38.subramanianT1.gtf

hg38.subramanianT2.gtf

transcripts.gtf

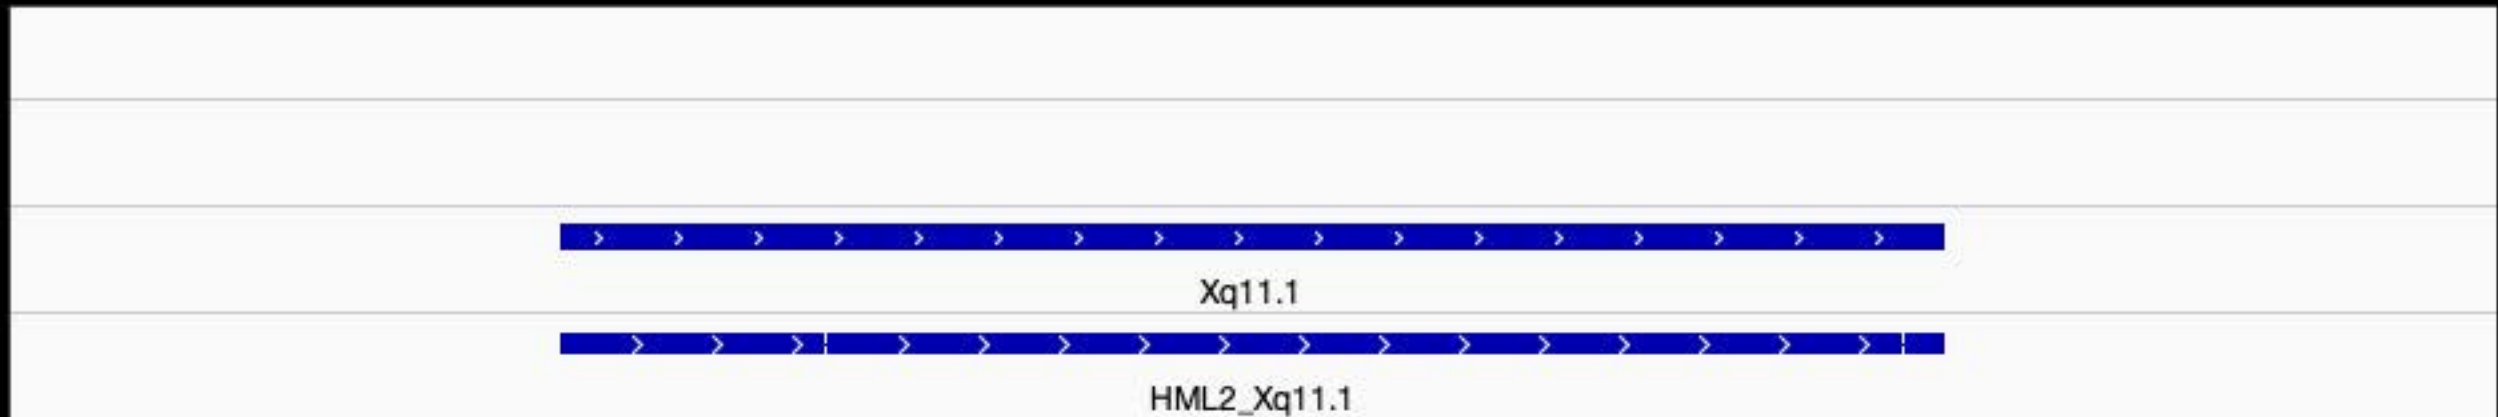

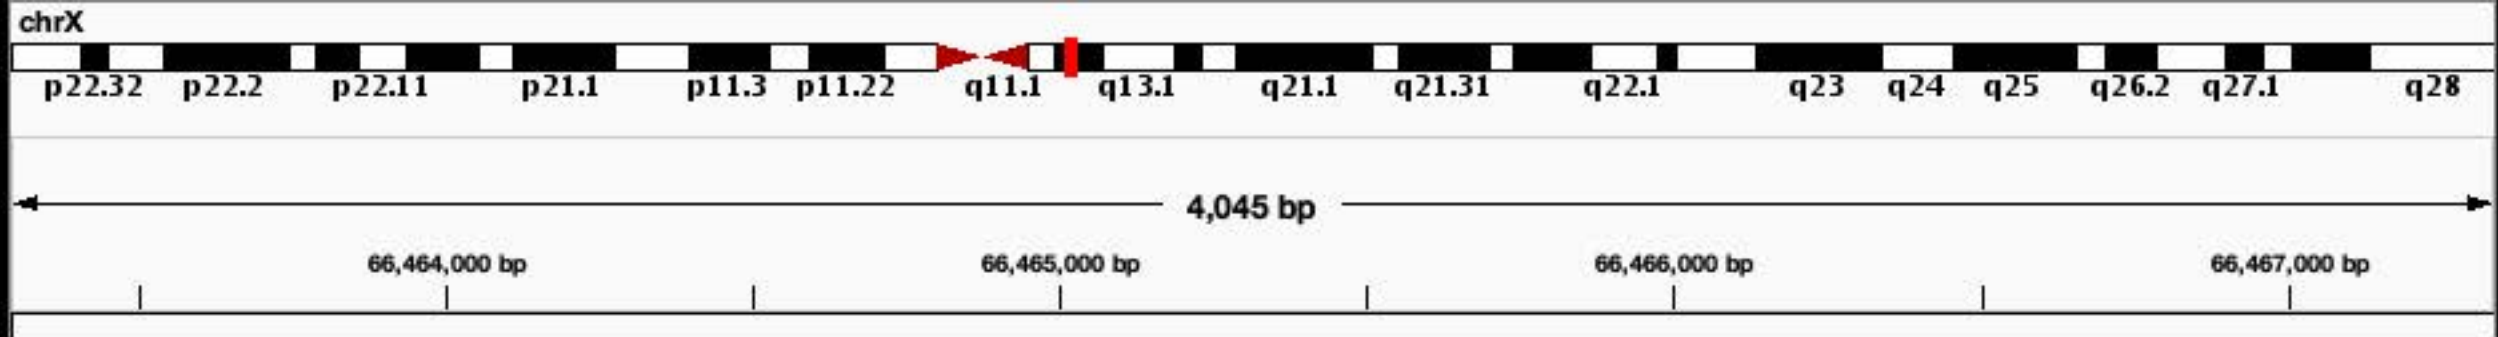

Gene

hg38.subramanianT1.gtf

hg38.subramanianT2.gtf

transcripts.gtf

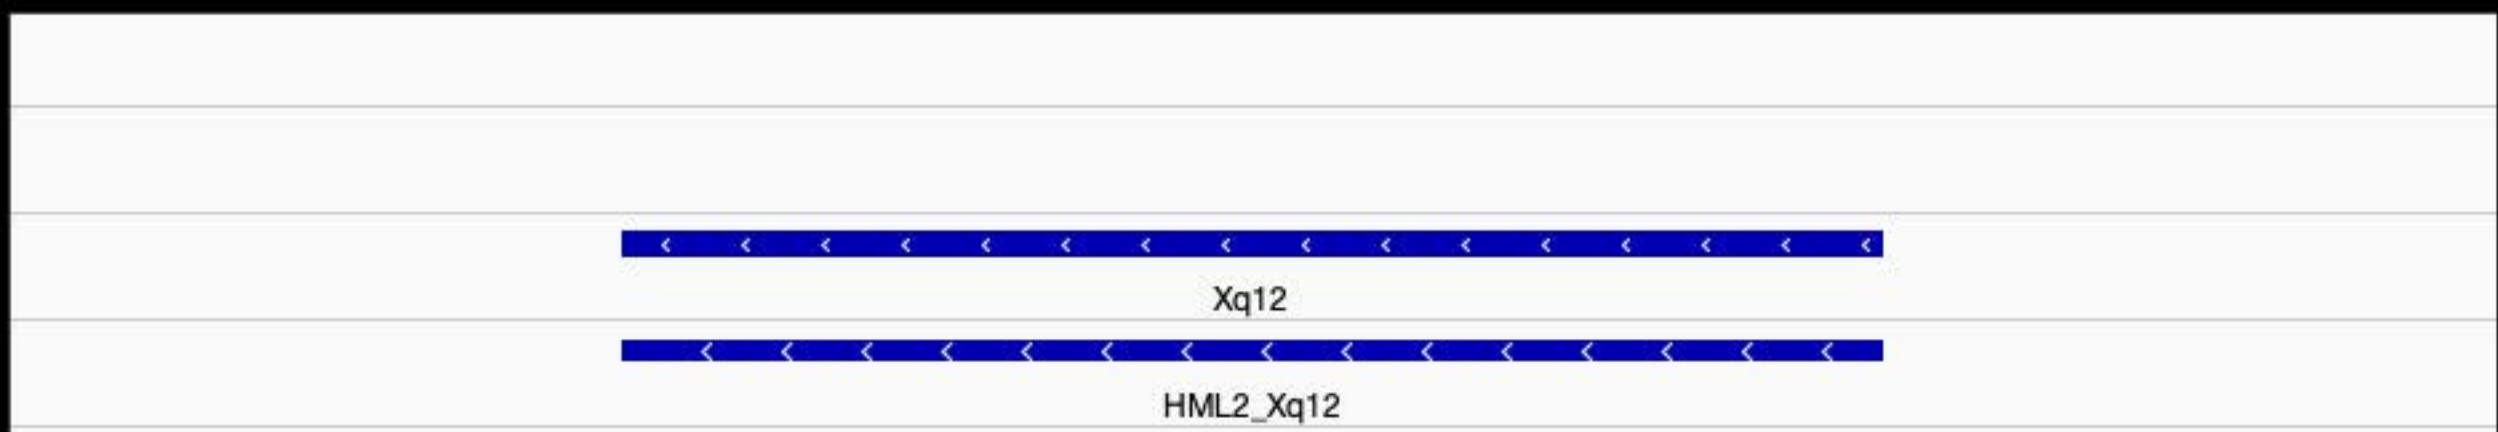

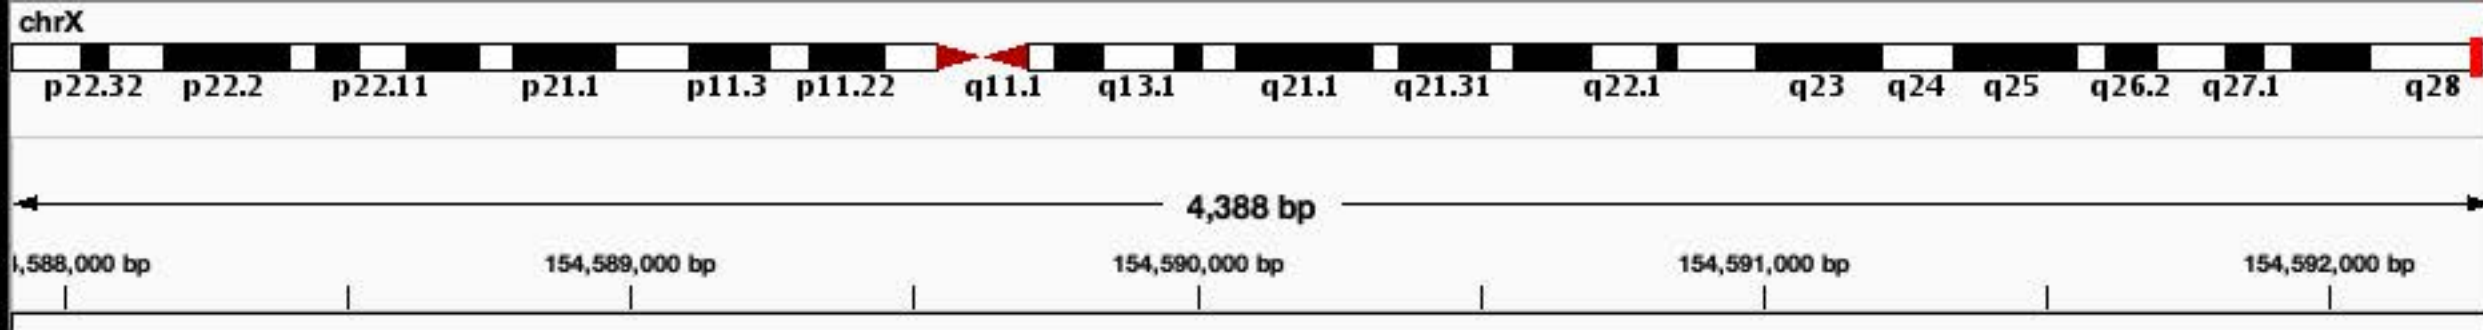

Gene

hg38.subramanianT1.gtf

hg38.subramanianT2.gtf

transcripts.gtf

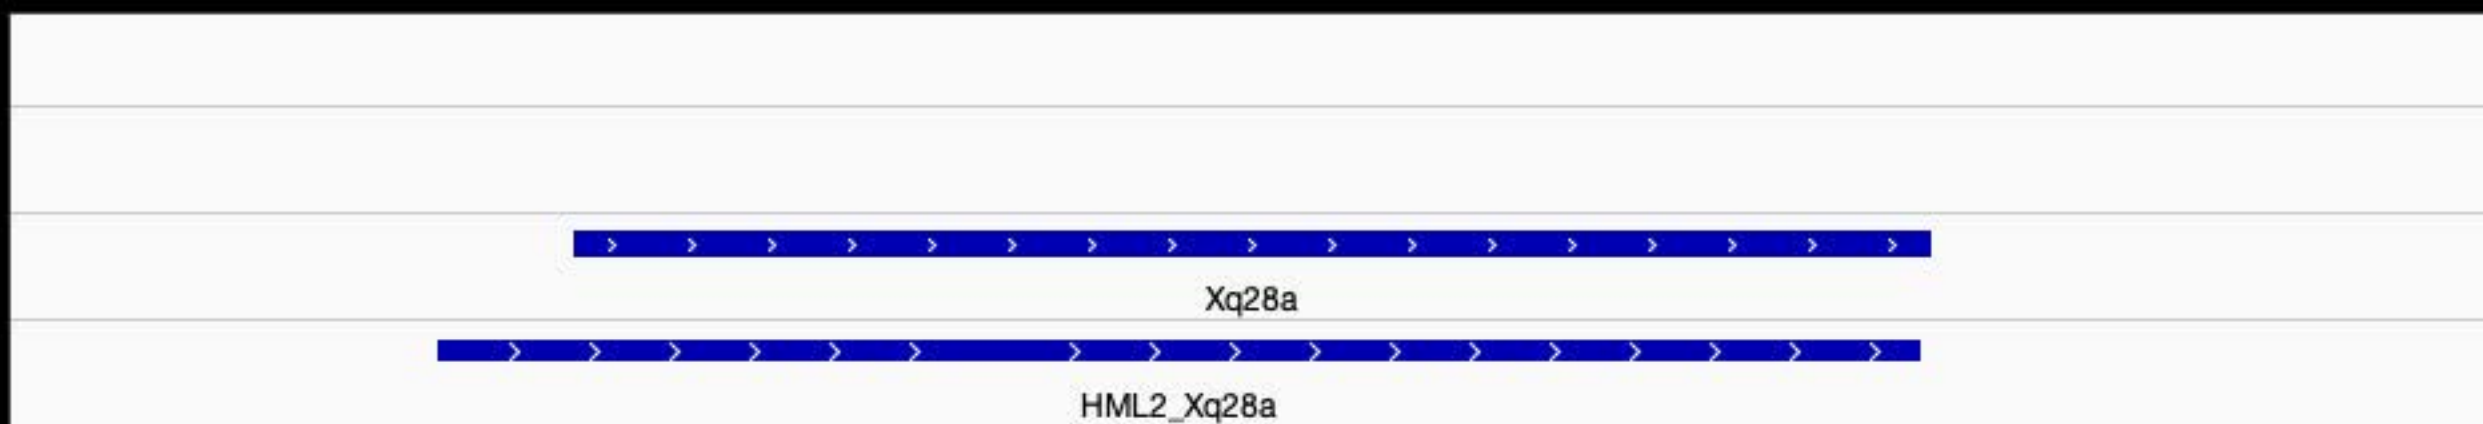

chrX

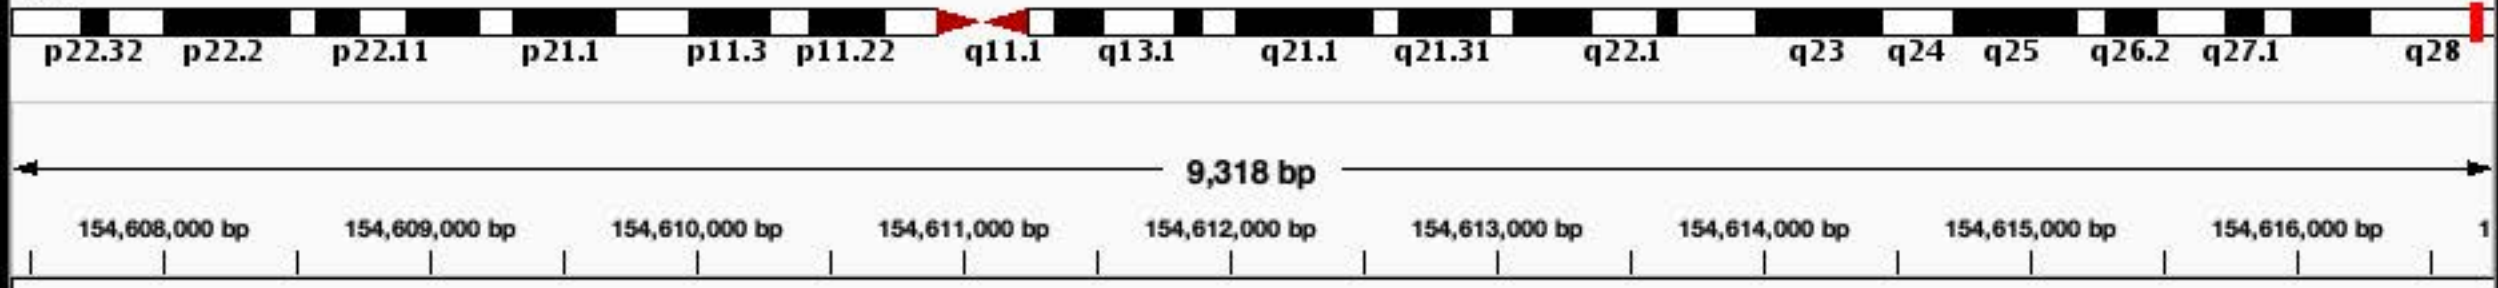

Gene

hg38.subramanianT1.gtf

hg38.subramanianT2.gtf

transcripts.gtf

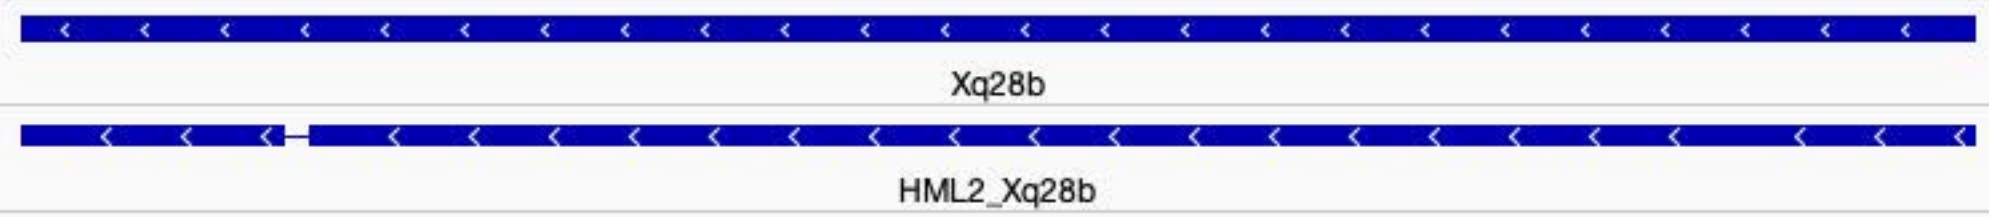

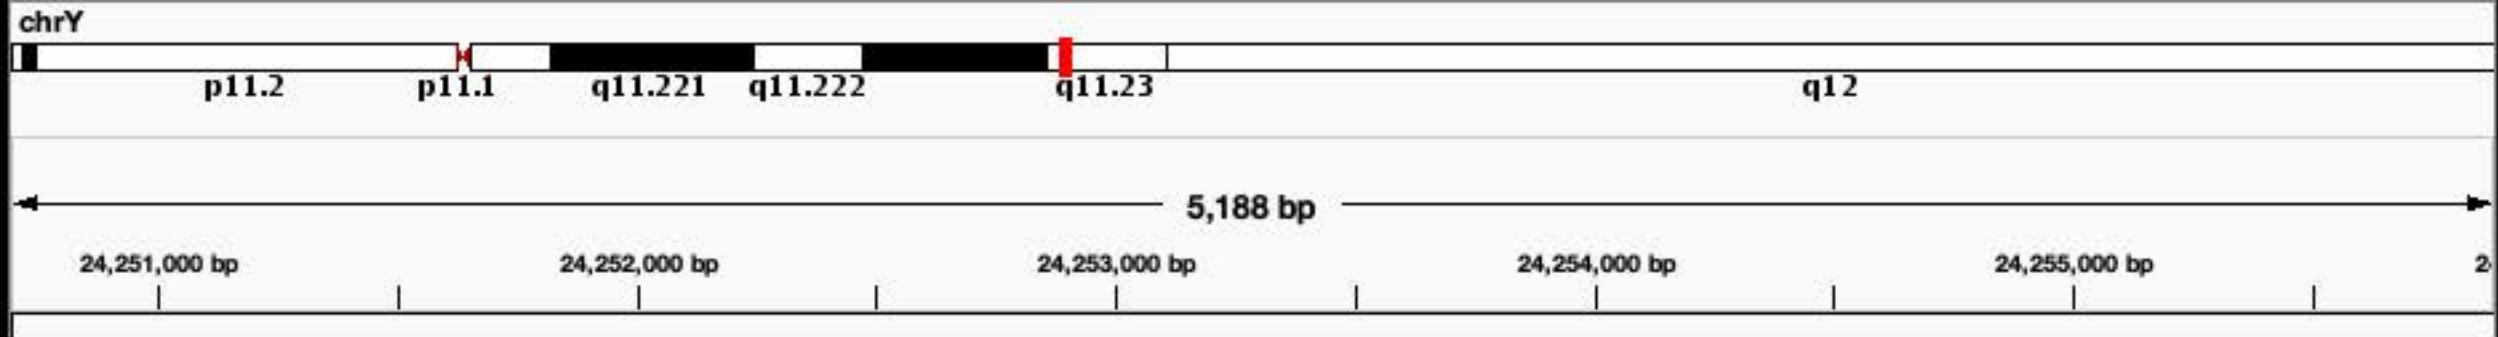

Gene

hg38.subramanianT1.gtf

hg38.subramanianT2.gtf

transcripts.gtf

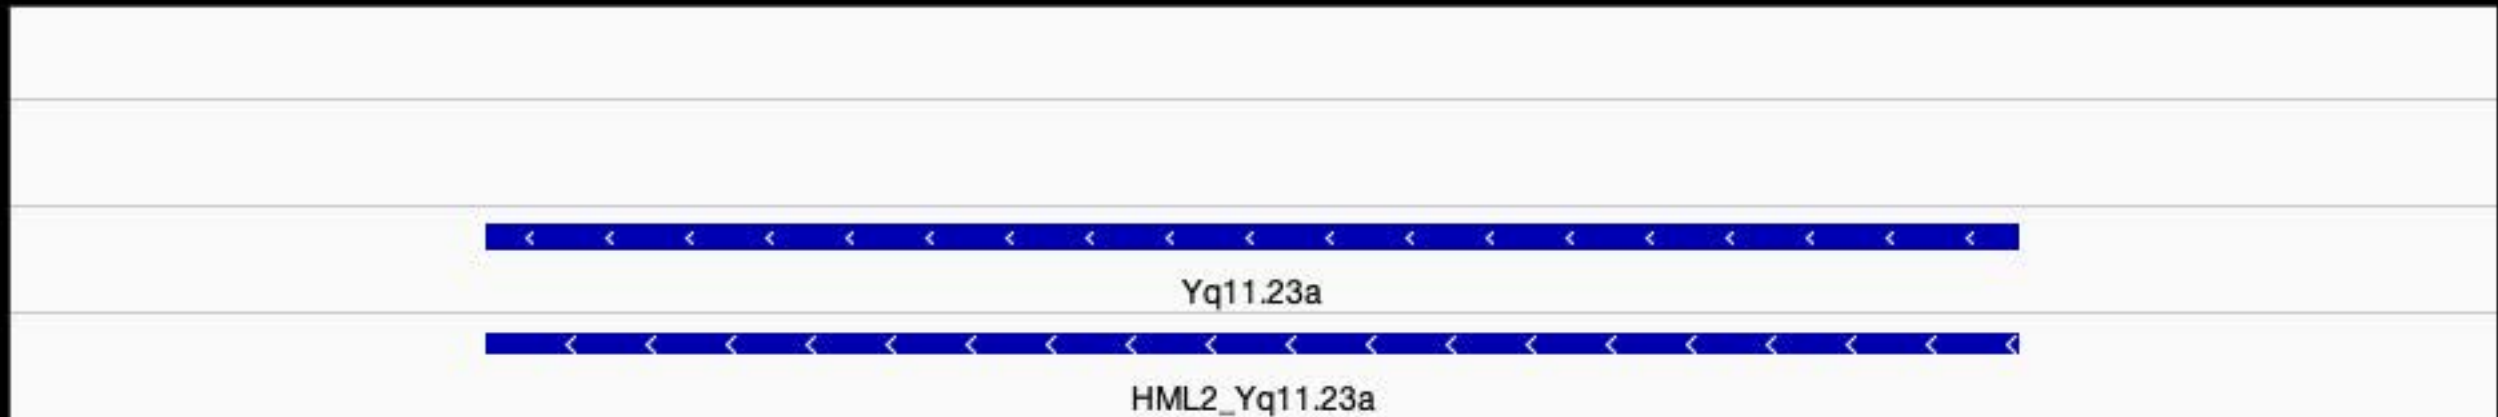



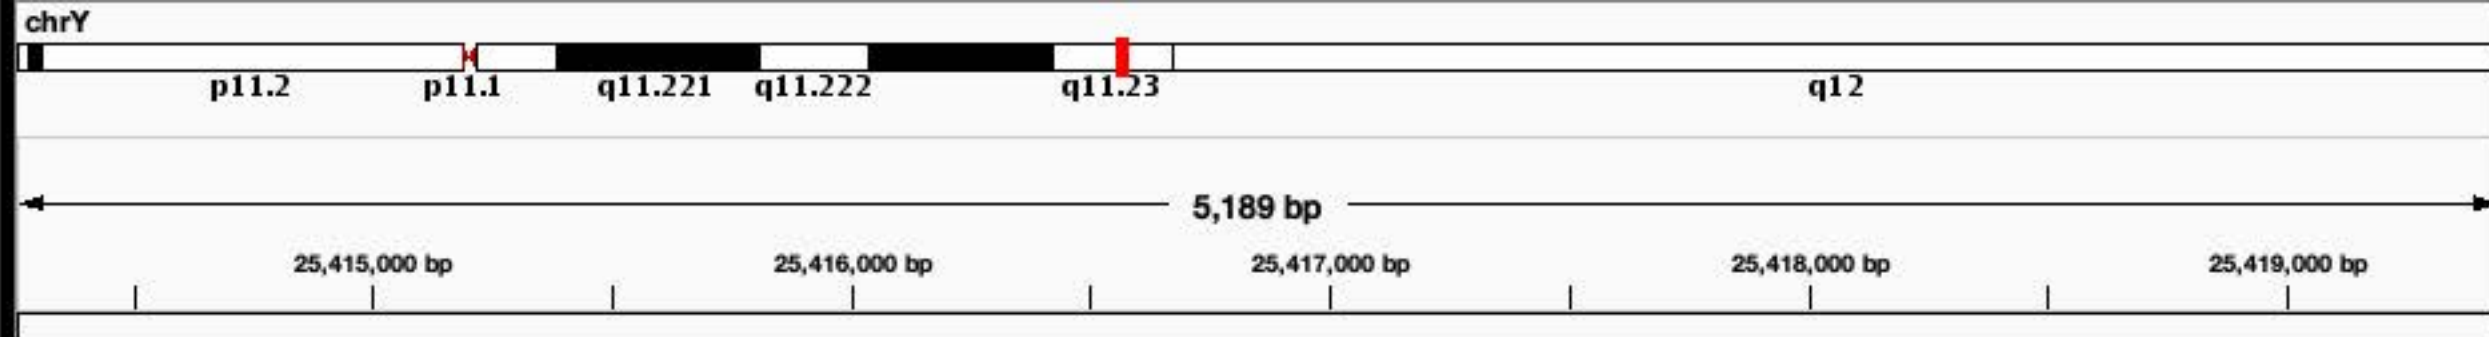

Gene

hg38.subramanianT1.gtf

hg38.subramanianT2.gtf

transcripts.gtf

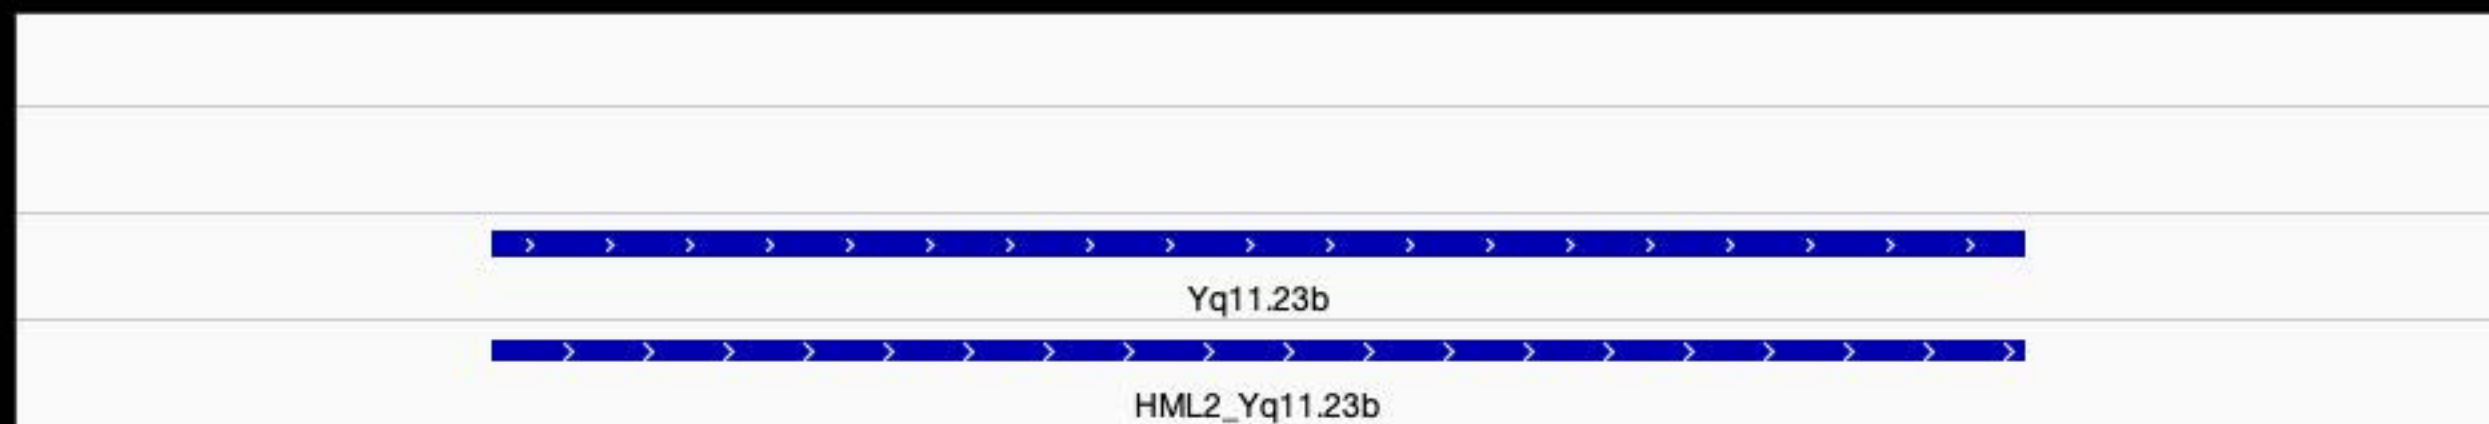

Supplement: pcbi.1006453.s008.pdf [file pcbi.1006453.s008.pdf]
